# Supplementary material for: Temporal dynamics of neurogenomic plasticity in response to social interactions in male threespined sticklebacks
Source: PLoS Genet. 2017 Jul 13;13(7):e1006840. doi: 10.1371/journal.pgen.1006840 (PMC5509087; doi:10.1371/journal.pgen.1006840)
Supplement: S4 Table — (XLSX) [file pgen.1006840.s006.xlsx]

## Sheet: D.DEGx
ensembl_gene_id	gene_name	description	chromosome_name	start_position	end_position	strand	logFC.D30	logFC.D60	logFC.D120	logCPM	LR	PValue	FDR	clus
ENSGACG00000009153	cga	glycoprotein hormones, alpha polypeptide [Source:ZFIN;Acc:ZDB-GENE-040715-2]	groupXV	6926679	6928403	1	-6.09383	3.71951	-7.69161	5.56874	65.2251	4.49e-14	1.35e-13	1
ENSGACG00000006561	prl	prolactin [Source:ZFIN;Acc:ZDB-GENE-030513-1]	groupXI	3126464	3129991	-1	-2.69234	4.03798	-9.48279	5.62528	58.9001	1.01e-12	3.03e-12	1
ENSGACG00000002863			groupXII	809521	810585	-1	-0.141607	-7.14724	5.02675	4.9804	49.4927	1.02e-10	3.07e-10	2
ENSGACG00000020103	zpld1a	zona pellucida-like domain containing 1a [Source:ZFIN;Acc:ZDB-GENE-110411-81]	groupVII	10761112	10770855	-1	-0.0486064	-5.16656	6.96751	0.166355	43.2741	2.15e-09	6.45e-09	2
ENSGACG00000014829	gh1	growth hormone 1 [Source:ZFIN;Acc:ZDB-GENE-030725-2]	groupXI	16069731	16072008	-1	-5.77427	3.34949	-7.23162	3.97298	43.0509	2.4e-09	7.2e-09	1
ENSGACG00000006593	smtla	somatolactin alpha [Source:ZFIN;Acc:ZDB-GENE-060123-2]	groupI	3537920	3541210	-1	-7.01974	1.08788	-2.55634	3.25273	36.5558	5.71e-08	1.71e-07	3
ENSGACG00000013876			groupXI	13646453	13647149	-1	-2.90319	-4.19632	-4.15666	1.45781	36.1702	6.89e-08	2.07e-07	3
ENSGACG00000017340	si:ch211-243g18.2	si:ch211-243g18.2 [Source:ZFIN;Acc:ZDB-GENE-030131-2830]	groupXIV	7334888	7342085	-1	-0.395349	-3.86285	4.15244	0.23171	35.7987	8.26e-08	2.48e-07	4
ENSGACG00000018113	MAMDC4	MAM domain containing 4 [Source:HGNC Symbol;Acc:HGNC:24083]	groupXIV	11278595	11287976	-1	0.238212	-0.399716	2.77453	2.95989	35.3864	1.01e-07	3.03e-07	5
ENSGACG00000004501	s100s	S100 calcium binding protein S [Source:ZFIN;Acc:ZDB-GENE-040822-31]	groupX	6810201	6810711	-1	1.24113	-4.99729	5.73954	-0.041985	33.172	2.96e-07	8.88e-07	2
ENSGACG00000009521	pomca	proopiomelanocortin a [Source:ZFIN;Acc:ZDB-GENE-030513-2]	groupX	14658688	14660689	-1	-6.11874	1.89309	-2.22124	5.12839	32.807	3.54e-07	1.06e-06	3
ENSGACG00000012092	s100t	S100 calcium binding protein T [Source:ZFIN;Acc:ZDB-GENE-050320-61]	groupXX	13228973	13229382	1	-0.174421	-4.40389	5.11938	-0.598803	31.1024	8.09e-07	2.42e-06	2
ENSGACG00000017311	pde6b	phosphodiesterase 6B, cGMP-specific, rod, beta [Source:ZFIN;Acc:ZDB-GENE-090421-2]	groupXIV	7319722	7327313	-1	-0.508719	-5.49876	4.44667	1.13006	29.9113	1.44e-06	4.32e-06	2
ENSGACG00000002791			groupVI	1439613	1448443	-1	-0.383559	-4.60263	3.53444	1.28447	29.631	1.65e-06	4.94e-06	4
ENSGACG00000003112	col2a1a	collagen type II, alpha-1a [Source:ZFIN;Acc:ZDB-GENE-980526-192]	groupXII	1468616	1485189	1	0.288144	-2.17261	2.32948	1.62723	29.181	2.05e-06	6.14e-06	5
ENSGACG00000020446	arr3a	arrestin 3a, retinal (X-arrestin) [Source:ZFIN;Acc:ZDB-GENE-040718-102]	groupVII	18670294	18676401	-1	-2.13049	-5.85724	4.95607	3.0169	28.5116	2.84e-06	8.49e-06	2
ENSGACG00000003567	tectb	tectorin beta [Source:ZFIN;Acc:ZDB-GENE-041212-16]	groupV	3836189	3838574	1	-0.599804	-2.83285	5.14647	-0.603609	28.1572	3.37e-06	1.01e-05	4
ENSGACG00000007705	gnat2	guanine nucleotide binding protein (G protein), alpha transducing activity polypeptide 2 [Source:ZFIN;Acc:ZDB-GENE-011128-10]	groupXII	10028631	10034853	1	0.100155	-4.61086	3.59729	2.89347	28.1591	3.36e-06	1.01e-05	4
ENSGACG00000012301	gnat1	guanine nucleotide binding protein (G protein), alpha transducing activity polypeptide 1 [Source:ZFIN;Acc:ZDB-GENE-011128-11]	groupXVII	14591379	14594859	-1	-0.0228571	-4.75395	3.46634	3.78348	26.3697	7.98e-06	2.39e-05	4
ENSGACG00000003833	osbpl7	oxysterol binding protein-like 7 [Source:ZFIN;Acc:ZDB-GENE-041010-212]	groupV	4513231	4520750	-1	-0.709293	-4.14763	2.98213	-0.225728	26.1165	9.02e-06	2.7e-05	4
ENSGACG00000002787	inaa	internexin neuronal intermediate filament protein, alpha a [Source:ZFIN;Acc:ZDB-GENE-060531-65]	groupVI	1434642	1438648	-1	-0.739592	-4.59275	3.33829	0.849526	26.0382	9.36e-06	2.8e-05	4
ENSGACG00000018668			groupVII	518792	520048	1	-6.5057	5.26503	6.33704	-1.13326	25.9175	9.92e-06	2.97e-05	3
ENSGACG00000016811	pde6a	phosphodiesterase 6A, cGMP-specific, rod, alpha [Source:ZFIN;Acc:ZDB-GENE-030616-42]	groupIV	4184397	4203182	-1	0.0889519	-4.11833	2.87091	1.43115	25.894	1e-05	3e-05	4
ENSGACG00000011475	lhb	luteinizing hormone, beta polypeptide [Source:ZFIN;Acc:ZDB-GENE-040806-2]	groupVI	15261701	15263536	1	-5.67356	2.74791	-5.79386	2.13198	25.6529	1.13e-05	3.37e-05	1
ENSGACG00000004123			groupVIII	2313099	2315708	-1	-0.0853211	-5.21535	4.04577	-0.0454198	25.6243	1.14e-05	3.42e-05	4
ENSGACG00000009422	gnb3b	guanine nucleotide binding protein (G protein), beta polypeptide 3b [Source:ZFIN;Acc:ZDB-GENE-040426-2280]	groupX	14546539	14552132	-1	0.0470495	-4.89145	3.80208	1.65931	25.2135	1.39e-05	4.16e-05	4
ENSGACG00000006726	pde6c	phosphodiesterase 6C, cGMP-specific, cone, alpha prime [Source:ZFIN;Acc:ZDB-GENE-040426-1664]	groupV	8799194	8807124	1	0.244883	-3.77023	2.5125	1.22477	25.1942	1.41e-05	4.2e-05	5
ENSGACG00000017065	clul1	clusterin-like 1 (retinal) [Source:ZFIN;Acc:ZDB-GENE-031118-57]	groupIII	12784519	12788659	1	-0.484823	-6.35196	4.05714	2.03247	25.1918	1.41e-05	4.21e-05	2
ENSGACG00000007435	pdcb (1 of 2)	phosducin b [Source:ZFIN;Acc:ZDB-GENE-031023-2]	groupVIII	8465078	8467677	1	-0.39351	-4.36126	3.28571	0.505116	25.0328	1.52e-05	4.54e-05	4
ENSGACG00000017170			groupIV	5742527	5747140	-1	-1.2386	-5.12069	4.21907	1.98533	24.5661	1.9e-05	5.68e-05	2
ENSGACG00000008019	syt5b	synaptotagmin Vb [Source:ZFIN;Acc:ZDB-GENE-050522-134]	groupV	9906473	9910321	-1	-0.146777	-2.41523	1.89224	0.99236	23.8944	2.63e-05	7.85e-05	6
ENSGACG00000020463	PCYOX1L	prenylcysteine oxidase 1 like [Source:HGNC Symbol;Acc:HGNC:28477]	groupVII	18979716	18986161	-1	1.22855	-0.807172	-1.48427	5.0388	23.6922	2.9e-05	8.65e-05	7
ENSGACG00000006256	gngt1	guanine nucleotide binding protein (G protein), gamma transducing activity polypeptide 1 [Source:ZFIN;Acc:ZDB-GENE-030131-7596]	groupX	8878295	8879183	-1	0.0182327	-4.44589	2.8181	2.79942	23.659	2.94e-05	8.79e-05	4
ENSGACG00000012325	prph2b	peripherin 2b (retinal degeneration, slow) [Source:ZFIN;Acc:ZDB-GENE-000616-9]	groupVI	16878548	16882045	-1	0.694962	-4.74102	3.32038	-0.575585	23.6413	2.97e-05	8.86e-05	4
ENSGACG00000005959	CKMT2 (2 of 2)	creatine kinase, mitochondrial 2 (sarcomeric) [Source:HGNC Symbol;Acc:HGNC:1996]	groupXIII	4441375	4446248	1	-0.42521	-4.77271	3.69623	2.07135	23.5554	3.09e-05	9.23e-05	4
ENSGACG00000013141	atp2a1	ATPase, Ca++ transporting, cardiac muscle, fast twitch 1 [Source:ZFIN;Acc:ZDB-GENE-020905-1]	groupXI	12754742	12769556	-1	-2.27892	1.16484	-1.76546	1.90506	23.4338	3.28e-05	9.79e-05	3
ENSGACG00000008957	atp2b1b	ATPase, Ca++ transporting, plasma membrane 1b [Source:ZFIN;Acc:ZDB-GENE-080409-1]	groupXIX	10104117	10120212	1	-0.616596	-3.84335	2.59353	-0.440437	23.3792	3.37e-05	0.000100427	4
ENSGACG00000010211	guk1b	guanylate kinase 1b [Source:ZFIN;Acc:ZDB-GENE-020916-1]	groupVIII	12928094	12932946	-1	0.0674289	-3.80549	3.12659	1.54585	23.3157	3.47e-05	0.000103525	4
ENSGACG00000007162			groupXI	3854940	3856853	1	-0.194642	-5.57844	3.82928	2.14791	23.127	3.8e-05	0.000113317	2
ENSGACG00000015748	grk7a	G-protein-coupled receptor kinase 7a [Source:ZFIN;Acc:ZDB-GENE-050824-1]	groupIII	9026167	9031456	1	-0.448185	-4.31187	2.87297	-0.277207	22.8148	4.41e-05	0.000131594	4
ENSGACG00000015437			groupXIV	44966	46150	-1	0.15002	-3.97565	3.98198	0.326544	22.7456	4.56e-05	0.000136026	4
ENSGACG00000009609			groupX	14724687	14728964	-1	-0.560442	2.7527	-0.268963	1.36036	22.6578	4.76e-05	0.000141868	8
ENSGACG00000016460	oacyl	O-acyltransferase like [Source:ZFIN;Acc:ZDB-GENE-090710-2]	groupXIV	3931527	3938003	1	-3.27796	0.140047	-0.0662972	2.01998	22.6376	4.81e-05	0.000143243	3
ENSGACG00000014695	pdcb (2 of 2)	phosducin b [Source:ZFIN;Acc:ZDB-GENE-031023-2]	groupIII	5405267	5407603	1	-0.052184	-5.22693	3.30671	0.765121	22.6058	4.88e-05	0.000145434	4
ENSGACG00000013729	cnga3a	cyclic nucleotide gated channel alpha 3a [Source:ZFIN;Acc:ZDB-GENE-090611-2]	groupVIII	17753698	17760795	1	2.00511	-1.64046	-0.23363	2.60259	22.5873	4.92e-05	0.000146727	7
ENSGACG00000020277	rom1a	retinal outer segment membrane protein 1a [Source:ZFIN;Acc:ZDB-GENE-040426-1765]	groupVII	15434894	15438709	1	0.341457	-6.21835	3.9764	1.60026	22.5315	5.06e-05	0.000150689	2
ENSGACG00000019176	pfkfb3	6-phosphofructo-2-kinase/fructose-2,6-biphosphatase 3 [Source:ZFIN;Acc:ZDB-GENE-040426-2724]	groupIV	22147684	22153447	1	-0.516544	-0.915016	1.02946	3.49841	22.4733	5.2e-05	0.000154925	9
ENSGACG00000012427	ckmb	creatine kinase, muscle b [Source:ZFIN;Acc:ZDB-GENE-040426-2128]	groupI	15913134	15919082	1	-4.23559	0.807741	-3.5901	2.46726	22.4657	5.22e-05	0.000155479	3
ENSGACG00000001816	irg1	immunoresponsive gene 1 [Source:ZFIN;Acc:ZDB-GENE-081104-428]	groupXVI	2495273	2497944	-1	0.0476116	-4.4904	2.00746	2.9846	22.4457	5.27e-05	0.000156968	5
ENSGACG00000005276	tshb	thyroid stimulating hormone, beta subunit [Source:ZFIN;Acc:ZDB-GENE-030513-3]	groupXVII	3500288	3502491	-1	-4.84997	1.50749	-6.7083	-0.0677875	22.4383	5.29e-05	0.00015752	1
ENSGACG00000016903	rom1b	retinal outer segment membrane protein 1b [Source:ZFIN;Acc:ZDB-GENE-040426-1073]	groupIV	5039722	5043757	1	-0.788416	-6.81469	4.94767	2.01564	22.3583	5.49e-05	0.000163633	2
ENSGACG00000010229	opn1sw2	opsin 1 (cone pigments), short-wave-sensitive 2 [Source:ZFIN;Acc:ZDB-GENE-990604-40]	groupXVII	10617436	10619138	1	0.0799535	-6.20898	4.11613	1.01175	22.1994	5.93e-05	0.000176547	2
ENSGACG00000007600	lin37	lin-37 homolog (C. elegans) [Source:ZFIN;Acc:ZDB-GENE-050417-446]	groupXX	8907622	8910713	-1	0.588323	-1.32866	-0.348927	5.79264	22.1927	5.95e-05	0.000177107	7
ENSGACG00000006407	gucy2f	guanylate cyclase 2F, retinal [Source:ZFIN;Acc:ZDB-GENE-011128-7]	groupI	3129406	3136785	-1	-0.321352	-3.78221	2.96834	0.0297645	22.1798	5.98e-05	0.000178198	4
ENSGACG00000002068			groupXIX	428034	429135	-1	0.96198	6.56122	1.0276	-0.879379	22.036	6.41e-05	0.000190862	8
ENSGACG00000000615	FAIM2 (1 of 2)	Fas apoptotic inhibitory molecule 2 [Source:HGNC Symbol;Acc:HGNC:17067]	scaffold_27	1372981	1374626	1	-0.240923	-3.10304	2.32827	-0.0358054	21.9696	6.62e-05	0.000197019	5
ENSGACG00000017900	CNGA1 (2 of 2)	cyclic nucleotide gated channel alpha 1 [Source:HGNC Symbol;Acc:HGNC:2148]	groupIX	8868125	8871488	1	0.497086	-3.49108	2.44993	0.770124	21.891	6.87e-05	0.00020457	5
ENSGACG00000015171			groupIII	7098658	7106063	-1	-0.283208	-2.56307	1.44989	3.21261	21.8586	6.98e-05	0.00020776	6
ENSGACG00000018033	arl3l2	ADP-ribosylation factor-like 3, like 2 [Source:ZFIN;Acc:ZDB-GENE-040426-1678]	groupIV	11017480	11020806	-1	-0.315098	-3.27889	2.59596	0.481595	21.6359	7.77e-05	0.000231084	5
ENSGACG00000014288	slc2a6	solute carrier family 2 (facilitated glucose transporter), member 6 [Source:ZFIN;Acc:ZDB-GENE-081104-301]	groupXI	14746039	14749506	1	0.264138	-4.65511	2.96238	0.784112	21.4966	8.3e-05	0.000246946	4
ENSGACG00000001419	sagb	S-antigen; retina and pineal gland (arrestin) b [Source:ZFIN;Acc:ZDB-GENE-050913-98]	scaffold_186	134753	138182	1	-0.382003	-5.60489	4.37164	2.11171	21.4825	8.36e-05	0.000248611	2
ENSGACG00000003215	prph2a	peripherin 2a (retinal degeneration, slow) [Source:ZFIN;Acc:ZDB-GENE-000616-8]	groupV	2545786	2550169	-1	-0.833105	-5.77573	5.6385	-1.15512	21.278	9.22e-05	0.000274115	2
ENSGACG00000001490	sfi1	Sfi1 homolog, spindle assembly associated (yeast) [Source:ZFIN;Acc:ZDB-GENE-080206-4]	scaffold_27	4277151	4279348	1	0.210858	-0.283397	-0.591302	3.93764	21.2578	9.31e-05	0.000276768	10
ENSGACG00000012574	slc2a1a	solute carrier family 2 (facilitated glucose transporter), member 1a [Source:ZFIN;Acc:ZDB-GENE-030131-3158]	groupXII	16618822	16626452	1	0.567244	-5.16707	4.55757	-0.834652	21.232	9.42e-05	0.000280165	2
ENSGACG00000012419	klc3	kinesin light chain 3 [Source:ZFIN;Acc:ZDB-GENE-060929-772]	groupI	15889642	15897725	-1	-0.103899	-0.624259	-0.407378	3.12884	21.2083	9.53e-05	0.000283345	11
ENSGACG00000003189			groupXX	516953	520979	-1	0.641001	-4.70416	3.49797	-1.19207	20.9446	0.000108102	0.000321357	4
ENSGACG00000009414			groupI	9059605	9062045	-1	-0.23137	-4.75049	3.3688	-0.90424	20.8898	0.000110972	0.000329851	4
ENSGACG00000016445	cplx4a	complexin 4a [Source:ZFIN;Acc:ZDB-GENE-060526-116]	groupXIV	3902066	3906382	1	-0.185718	-3.88569	2.73665	0.694002	20.8129	0.000115126	0.000342178	4
ENSGACG00000006419	mmp13b	matrix metalloproteinase 13b [Source:ZFIN;Acc:ZDB-GENE-030131-6152]	groupI	3154035	3156749	-1	-0.409107	2.36862	-1.41692	1.16647	20.7456	0.00011889	0.000353324	8
ENSGACG00000002471	FFAR1	free fatty acid receptor 1 [Source:HGNC Symbol;Acc:HGNC:4498]	groupX	2125535	2126404	-1	-3.737	1.1973	0.702793	-1.04323	20.7351	0.000119491	0.00035509	3
ENSGACG00000004859	slc24a1	solute carrier family 24 (sodium/potassium/calcium exchanger), member 1 [Source:ZFIN;Acc:ZDB-GENE-060503-191]	groupXIX	6447101	6452382	1	-0.65456	-4.92959	3.79448	-1.2454	20.5206	0.000132383	0.000393309	4
ENSGACG00000005970			groupXI	2515096	2516105	1	-0.111123	-0.869241	3.41335	1.86505	20.4725	0.000135461	0.000402432	5
ENSGACG00000001421	eef1db (1 of 2)	elongation factor-1, delta, b [Source:ZFIN;Acc:ZDB-GENE-030131-6544]	scaffold_1251	3157	5399	-1	1.69695	-0.392982	2.2154	0.0422307	20.3884	0.000141018	0.000418843	12
ENSGACG00000020231	MLXIPL	MLX interacting protein-like [Source:HGNC Symbol;Acc:HGNC:12744]	groupVII	14513150	14527273	1	0.502164	-0.719614	-1.30072	2.33811	20.3576	0.000143105	0.000425017	7
ENSGACG00000016988	samd7	sterile alpha motif domain containing 7 [Source:ZFIN;Acc:ZDB-GENE-070912-549]	groupIII	12527112	12533845	-1	0.146636	-3.1657	1.85478	-1.03126	20.2183	0.000152949	0.000454202	5
ENSGACG00000017329	rbp4l	retinol binding protein 4, like [Source:ZFIN;Acc:ZDB-GENE-030131-7591]	groupXIV	7331177	7333523	1	-0.0748357	-3.56874	1.94057	3.74326	20.1266	0.000159789	0.000474486	5
ENSGACG00000007591	cabp5a	calcium binding protein 5a [Source:ZFIN;Acc:ZDB-GENE-040426-1655]	groupV	9619299	9621532	1	-0.241514	-2.90967	2.23342	1.38277	20.0463	0.000166034	0.000492974	5
ENSGACG00000001195	zgc:112334	zgc:112334 [Source:ZFIN;Acc:ZDB-GENE-050809-120]	scaffold_27	3290952	3295605	-1	-0.573826	-4.02572	3.05761	-1.71224	20.0332	0.000167078	0.000496043	4
ENSGACG00000010448			groupX	15606906	15612686	-1	-0.227697	-3.70055	4.36128	-0.490276	20.0225	0.000167933	0.000498553	4
ENSGACG00000016707	abca4b	ATP-binding cassette, sub-family A (ABC1), member 4b [Source:ZFIN;Acc:ZDB-GENE-050517-4]	groupIII	11515854	11543148	1	0.137144	-1.67556	1.21035	2.92299	19.9469	0.000174095	0.000516788	9
ENSGACG00000016084	hk1	hexokinase 1 [Source:ZFIN;Acc:ZDB-GENE-040426-2848]	groupII	13433139	13446582	1	-0.221288	-0.665998	0.19205	3.33416	19.9454	0.000174227	0.000517149	11
ENSGACG00000015769	saga	S-antigen; retina and pineal gland (arrestin) a [Source:ZFIN;Acc:ZDB-GENE-040426-1538]	scaffold_135	49069	55745	-1	-0.133633	-3.08264	1.43536	2.3083	19.9305	0.000175467	0.0005208	6
ENSGACG00000020683	WASF3 (2 of 2)	WAS protein family, member 3 [Source:HGNC Symbol;Acc:HGNC:12734]	groupVII	22258790	22263269	-1	-0.272528	-3.60212	1.93958	-1.19407	19.9089	0.000177284	0.000526162	5
ENSGACG00000009365			groupX	14501579	14507522	-1	-1.62369	-5.47602	4.43901	1.7031	19.8821	0.000179561	0.000532891	2
ENSGACG00000001368	cx30.3	connexin 30.3 [Source:ZFIN;Acc:ZDB-GENE-040406-1]	scaffold_115	201829	202626	-1	0.598856	-2.24329	4.51226	-1.5939	19.855	0.000181899	0.000539798	5
ENSGACG00000005324	nsmfb (2 of 2)	NMDA receptor synaptonuclear signaling and neuronal migration factor b [Source:ZFIN;Acc:ZDB-GENE-080603-4]	groupXIII	3199826	3242850	-1	0.0781165	0.855712	0.320761	3.66602	19.8064	0.000186167	0.000552432	10
ENSGACG00000020168	ckma	creatine kinase, muscle a [Source:ZFIN;Acc:ZDB-GENE-980526-109]	groupVII	12658666	12661721	1	-4.10384	0.348181	-3.69681	1.87321	19.7397	0.000192181	0.000570212	3
ENSGACG00000000705	gpr84	G protein-coupled receptor 84 [Source:ZFIN;Acc:ZDB-GENE-070928-33]	scaffold_27	1892715	1893911	1	-0.0876998	-5.5367	3.8876	-0.0419392	19.6614	0.000199493	0.000591803	2
ENSGACG00000006779			groupXVI	13588753	13591693	1	-0.0805864	-3.29669	2.79476	-0.190229	19.599	0.000205524	0.000609624	5
ENSGACG00000014752			groupI	22723990	22724814	1	-3.22905	-0.580559	-2.92184	-0.401115	19.5796	0.000207431	0.000615208	3
ENSGACG00000014898	arhgap20	Rho GTPase activating protein 20 [Source:ZFIN;Acc:ZDB-GENE-071015-1]	groupI	23177069	23181934	-1	-1.00874	-1.6457	0.465248	0.667771	19.5682	0.000208558	0.000618516	13
ENSGACG00000000759	acox3	acyl-Coenzyme A oxidase 3, pristanoyl [Source:ZFIN;Acc:ZDB-GENE-040426-2163]	scaffold_47	344400	357377	1	0.320158	-0.601749	-0.494931	3.4594	19.5631	0.000209073	0.000620008	11
ENSGACG00000015964	pde6h (1 of 2)	phosphodiesterase 6H, cGMP-specific, cone, gamma [Source:ZFIN;Acc:ZDB-GENE-040426-1754]	groupIX	580825	582033	1	-0.276316	-5.39727	4.50195	3.23997	19.5017	0.000215282	0.000638377	2
ENSGACG00000020681	zdhhc23a	zinc finger, DHHC-type containing 23a [Source:ZFIN;Acc:ZDB-GENE-060526-38]	groupVII	22247011	22249303	-1	-1.3927	-2.34157	0.0859896	-0.461476	19.5016	0.000215292	0.000638377	13
ENSGACG00000017121	slc1a2a	solute carrier family 1 (glial high affinity glutamate transporter), member 2a [Source:ZFIN;Acc:ZDB-GENE-100422-11]	groupII	20642283	20649346	1	0.00302763	-3.25861	2.33864	-0.526015	19.4072	0.000225195	0.000667663	5
ENSGACG00000008236	zgc:195245	zgc:195245 [Source:ZFIN;Acc:ZDB-GENE-081022-200]	groupXII	10430875	10434128	1	0.00203275	-3.99727	2.93815	-1.21709	19.3572	0.000230623	0.000683717	4
ENSGACG00000007920	si:dkey-94f20.4	si:dkey-94f20.4 [Source:ZFIN;Acc:ZDB-GENE-121214-276]	groupV	9843538	9849484	1	-0.0243716	-3.13207	2.05721	1.16151	19.3161	0.000235186	0.000697164	5
ENSGACG00000008348	cdhr1a	cadherin-related family member 1a [Source:ZFIN;Acc:ZDB-GENE-040924-4]	groupVI	9597602	9607340	-1	0.179267	-3.19046	2.14253	-0.480691	19.2968	0.000237355	0.000703554	5
ENSGACG00000019816	kera	keratocan [Source:ZFIN;Acc:ZDB-GENE-041210-165]	groupIV	30577058	30578127	1	0.290929	-4.7476	3.43227	-1.84354	19.2942	0.000237655	0.000704402	4
ENSGACG00000013854			groupXIX	19574771	19576833	-1	0.01807	-6.74795	4.32494	-0.507548	19.2915	0.000237959	0.000705263	2
ENSGACG00000003369	guca1b	guanylate cyclase activator 1B [Source:ZFIN;Acc:ZDB-GENE-011128-6]	groupXII	2022972	2023975	-1	-0.375888	-6.28027	4.05685	-0.644166	19.1302	0.000256961	0.000761447	2
ENSGACG00000015025	SLC27A2 (3 of 3)	solute carrier family 27 (fatty acid transporter), member 2 [Source:HGNC Symbol;Acc:HGNC:10996]	groupII	5798521	5805341	-1	1.09395	-1.13875	0.770823	1.57416	19.0553	0.000266301	0.000789078	12
ENSGACG00000003079	grk1a (1 of 2)	G protein-coupled receptor kinase 1 a [Source:ZFIN;Acc:ZDB-GENE-050823-1]	groupXVI	7497167	7500819	-1	-0.185046	-3.5024	2.45705	1.6627	19.0295	0.00026958	0.000798704	5
ENSGACG00000006502	parp6b	poly (ADP-ribose) polymerase family, member 6b [Source:ZFIN;Acc:ZDB-GENE-080219-1]	groupXIX	7707982	7712421	1	0.837401	-4.50898	2.91556	-1.81452	18.9835	0.000275554	0.000816308	4
ENSGACG00000000022	matn4	matrilin 4 [Source:ZFIN;Acc:ZDB-GENE-050208-64]	scaffold_89	230109	238032	-1	-0.153631	-1.44642	1.76814	0.894575	18.9678	0.000277616	0.00082237	9
ENSGACG00000016496	lrit3a	info leucine-rich repeat, immunoglobulin-like and transmembrane domains 3a [Source:ZFIN;Acc:ZDB-GENE-080723-63]	groupIV	1992232	1996986	-1	0.48945	-3.61608	2.64472	-1.6979	18.9421	0.000281044	0.000832427	5
ENSGACG00000015966	pde6h (2 of 2)	phosphodiesterase 6H, cGMP-specific, cone, gamma [Source:ZFIN;Acc:ZDB-GENE-040426-1754]	groupIX	585235	586792	-1	-0.519115	-3.68822	2.83266	-1.48214	18.9379	0.000281605	0.000834041	4
ENSGACG00000015788			scaffold_135	85407	88235	1	-0.593325	-3.45611	2.09852	2.3953	18.8796	0.00028953	0.000857265	4
ENSGACG00000006197			groupXI	2609853	2614614	-1	-0.654947	0.516255	-0.480893	4.53133	18.7909	0.000302006	0.000894051	10
ENSGACG00000008166	dusp19a	dual specificity phosphatase 19a [Source:ZFIN;Acc:ZDB-GENE-081104-382]	groupXVI	16043770	16046608	-1	-0.0498669	-2.58827	3.66387	-2.38182	18.7043	0.000314713	0.000931615	5
ENSGACG00000017352	TNNT3 (2 of 2)	troponin T type 3 (skeletal, fast) [Source:HGNC Symbol;Acc:HGNC:11950]	groupII	21934736	21940961	-1	-2.08538	0.881863	-1.68063	-0.095601	18.6861	0.000317453	0.000939631	3
ENSGACG00000000355	si:dkey-222f2.1	si:dkey-222f2.1 [Source:ZFIN;Acc:ZDB-GENE-050208-726]	scaffold_883	3360	7343	-1	-1.93421	-3.43335	4.65519	-1.24597	18.6721	0.000319575	0.000945845	4
ENSGACG00000005793	otx5	orthodenticle homolog 5 [Source:ZFIN;Acc:ZDB-GENE-030508-1]	groupI	1988336	1991038	-1	0.0117616	-3.49582	2.61851	-0.324197	18.6351	0.000325252	0.000962591	5
ENSGACG00000004900	irbp	interphotoreceptor retinoid-binding protein [Source:ZFIN;Acc:ZDB-GENE-990415-132]	groupV	5925725	5929372	1	-0.886014	-5.93559	2.71774	1.48093	18.6296	0.000326103	0.000965055	2
ENSGACG00000007182	mylpfb	myosin light chain, phosphorylatable, fast skeletal muscle b [Source:ZFIN;Acc:ZDB-GENE-040912-115]	groupV	9421587	9424849	-1	-3.30358	-0.949776	-2.44802	-1.0352	18.5542	0.000338003	0.000999982	3
ENSGACG00000006406			groupXI	2861620	2864070	-1	-0.00250784	-4.12448	2.88576	-1.32512	18.5362	0.000340916	0.00100854	4
ENSGACG00000008195	si:ch211-163l21.8	si:ch211-163l21.8 [Source:ZFIN;Acc:ZDB-GENE-041008-93]	groupXII	10408074	10416250	-1	-2.87717	1.04135	-1.00922	1.36912	18.5301	0.000341906	0.00101141	3
ENSGACG00000006401	si:ch211-207j7.2 (1 of 2)	si:ch211-207j7.2 [Source:ZFIN;Acc:ZDB-GENE-120215-232]	groupXI	2857169	2860602	-1	0.0388058	-3.61463	2.49305	-0.832127	18.4841	0.000349466	0.0010336	5
ENSGACG00000006839	sgcg	sarcoglycan, gamma [Source:ZFIN;Acc:ZDB-GENE-030724-2]	groupI	4128096	4137512	1	-0.624865	-0.762396	0.137241	2.07653	18.3278	0.000376411	0.00111303	11
ENSGACG00000012807	kcnv2a (1 of 2)	potassium channel, subfamily V, member 2a [Source:ZFIN;Acc:ZDB-GENE-091117-27]	groupXIII	14847154	14851257	1	-0.375423	-5.91572	3.78178	-0.233325	18.2863	0.00038392	0.00113517	2
ENSGACG00000001785	zgc:153932	zgc:153932 [Source:ZFIN;Acc:ZDB-GENE-070209-223]	scaffold_593	9963	12056	1	-0.376537	-0.324718	1.56162	0.801342	18.1255	0.000414391	0.00122492	9
ENSGACG00000012097	CACNA1F (2 of 2)	calcium channel, voltage-dependent, L type, alpha 1F subunit [Source:HGNC Symbol;Acc:HGNC:1393]	groupXII	15882175	15897748	-1	0.422289	-2.26076	1.26981	0.897765	18.0974	0.00041996	0.00124131	6
ENSGACG00000018704	gc2	guanylyl cyclase 2 [Source:ZFIN;Acc:ZDB-GENE-011128-8]	groupVII	590628	598335	-1	0.0899186	-2.65261	1.88656	0.255644	18.0867	0.000422098	0.00124748	6
ENSGACG00000009073	myo6b	myosin VIb [Source:ZFIN;Acc:ZDB-GENE-030318-3]	groupXV	6819291	6846566	1	-0.0689282	-1.2363	1.26868	1.01674	18.0759	0.000424284	0.0012538	9
ENSGACG00000003412	gngt2b	guanine nucleotide binding protein (G protein), gamma transducing activity polypeptide 2b [Source:ZFIN;Acc:ZDB-GENE-091020-4]	groupV	3481760	3482745	-1	-0.445266	-5.01027	3.95704	1.08106	18.0249	0.000434685	0.00128446	4
ENSGACG00000011605	pmelb	premelanosome protein b [Source:ZFIN;Acc:ZDB-GENE-050912-2]	groupXII	15350995	15355600	-1	-0.370026	-4.61991	1.57966	-0.462407	17.9401	0.000452534	0.00133713	5
ENSGACG00000010673	slc1a8b	solute carrier family 1 (glutamate transporter), member 8b [Source:ZFIN;Acc:ZDB-GENE-070912-552]	groupXV	9718255	9726270	-1	0.715266	-1.9937	1.48215	-0.140741	17.9399	0.000452584	0.0013372	6
ENSGACG00000002955			groupXIX	2513168	2523323	1	-2.62212	0.5723	-1.50342	0.134864	17.892	0.000463003	0.00136774	3
ENSGACG00000001956	rgs9bp	regulator of G-protein signalling 9 binding protein [Source:ZFIN;Acc:ZDB-GENE-030728-1]	groupXXI	2069582	2072605	1	-0.802817	-3.81495	2.50232	-1.36846	17.8884	0.000463796	0.00137001	4
ENSGACG00000001434	RHO (2 of 2)	rhodopsin [Source:HGNC Symbol;Acc:HGNC:10012]	scaffold_27	4159256	4160714	1	0.19992	-7.90194	5.40728	-0.337961	17.809	0.000481597	0.00142243	2
ENSGACG00000019917	CABP4 (2 of 2)	calcium binding protein 4 [Source:HGNC Symbol;Acc:HGNC:1386]	groupVII	8143647	8147227	-1	-0.786119	-5.77023	4.58651	-0.422361	17.7824	0.000487715	0.00144041	2
ENSGACG00000009620	ctsl.1	cathepsin L.1 [Source:ZFIN;Acc:ZDB-GENE-040718-61]	groupXV	7603276	7607758	1	0.40614	-3.41424	2.79648	2.94546	17.7501	0.000495256	0.0014626	5
ENSGACG00000005968	ndrg1a	N-myc downstream regulated gene 1a [Source:ZFIN;Acc:ZDB-GENE-030826-34]	groupX	8666553	8677287	-1	-0.0755425	-0.489022	-0.214198	6.24846	17.7451	0.00049642	0.00146595	11
ENSGACG00000001398	RHO (1 of 2)	rhodopsin [Source:HGNC Symbol;Acc:HGNC:10012]	scaffold_27	4146139	4148235	-1	0.143243	-6.23837	5.07951	2.80425	17.7235	0.000501547	0.00148101	2
ENSGACG00000012594	irgq2	immunity-related GTPase family, q2 [Source:ZFIN;Acc:ZDB-GENE-051212-7]	groupXX	14141597	14143269	-1	-0.953437	-4.2482	3.8626	-3.00446	17.6594	0.000517033	0.00152647	4
ENSGACG00000019252	si:ch73-111e15.1	si:ch73-111e15.1 [Source:ZFIN;Acc:ZDB-GENE-110411-28]	groupIX	16121524	16124104	-1	0.434455	-4.35371	1.9155	1.26722	17.6341	0.000523287	0.00154485	5
ENSGACG00000006820			groupVIII	7382329	7385332	1	-0.820416	-2.31374	-1.0043	-0.0252416	17.5683	0.000539873	0.00159372	13
ENSGACG00000009833	RING1	ring finger protein 1 [Source:HGNC Symbol;Acc:HGNC:10018]	groupX	15063627	15068329	-1	0.376072	-0.324055	0.253008	5.50192	17.5491	0.000544796	0.00160816	10
ENSGACG00000014839	kcnb2	potassium voltage-gated channel, Shab-related subfamily, member 2 [Source:ZFIN;Acc:ZDB-GENE-070912-170]	groupIII	5937498	5949782	1	0.0155732	-3.06611	2.19483	-1.07818	17.4871	0.000561072	0.00165592	5
ENSGACG00000009922	USP21	ubiquitin specific peptidase 21 [Source:HGNC Symbol;Acc:HGNC:12620]	groupXII	12402976	12406659	1	-0.606143	-2.39448	1.44846	-0.442231	17.4814	0.000562579	0.00166027	9
ENSGACG00000008124	MYOF (1 of 2)	myoferlin [Source:HGNC Symbol;Acc:HGNC:3656]	groupVI	9500387	9521995	1	1.2605	-0.335232	-0.434384	2.35006	17.4676	0.000566278	0.00167109	10
ENSGACG00000011463	OTOF (2 of 2)	otoferlin [Source:HGNC Symbol;Acc:HGNC:8515]	groupXV	11120356	11135054	-1	0.155241	-1.30307	2.22353	1.18795	17.4648	0.000567024	0.0016732	9
ENSGACG00000018652	IL4I1 (2 of 2)	interleukin 4 induced 1 [Source:HGNC Symbol;Acc:HGNC:19094]	groupVII	494053	497077	1	-0.277056	-4.47871	2.43996	2.31585	17.3811	0.000589977	0.00174043	4
ENSGACG00000008327	snx10b	sorting nexin 10b [Source:ZFIN;Acc:ZDB-GENE-070628-1]	groupXX	9752838	9753601	-1	-0.154134	-3.57943	2.86264	1.68044	17.369	0.000593388	0.00175029	5
ENSGACG00000006358	grn2	granulin 2 [Source:ZFIN;Acc:ZDB-GENE-050522-264]	groupX	9062709	9064969	1	0.190172	-3.15642	2.60405	1.86708	17.3114	0.000609814	0.00179843	5
ENSGACG00000007909	tmem237a	transmembrane protein 237a [Source:ZFIN;Acc:ZDB-GENE-070402-3]	groupXVI	15746121	15750301	1	0.230929	-3.36499	1.99156	-0.798517	17.2642	0.000623603	0.00183878	5
ENSGACG00000007397	atp2a1l	ATPase, Ca++ transporting, cardiac muscle, fast twitch 1 like [Source:ZFIN;Acc:ZDB-GENE-041229-2]	groupV	9492039	9501201	1	-3.55483	0.103564	-3.45598	2.67382	17.2465	0.000628856	0.00185416	3
ENSGACG00000011724	impg1a	interphotoreceptor matrix proteoglycan 1a [Source:ZFIN;Acc:ZDB-GENE-070424-197]	groupXVIII	12323011	12336831	1	0.286295	-2.96055	2.21005	-1.13347	17.1613	0.000654766	0.00193023	5
ENSGACG00000010601	rcv1	recoverin [Source:ZFIN;Acc:ZDB-GENE-030131-7590]	groupXX	12100423	12105492	-1	-0.167475	-4.13779	2.61556	-1.15904	17.1508	0.000658027	0.00193973	4
ENSGACG00000000716	opn1sw1	opsin 1 (cone pigments), short-wave-sensitive 1 [Source:ZFIN;Acc:ZDB-GENE-991109-25]	scaffold_90	461069	462906	1	-1.1389	-6.45916	3.42561	0.124482	17.0196	0.000700228	0.00206354	2
ENSGACG00000008453	cacna2d4b	calcium channel, voltage-dependent, alpha 2/delta subunit 4b [Source:ZFIN;Acc:ZDB-GENE-100422-18]	groupXIX	9414724	9447411	1	-0.0205864	-2.27274	1.82028	0.0876607	16.803	0.000775824	0.00228579	6
ENSGACG00000009696	CIDEC	cell death-inducing DFFA-like effector c [Source:HGNC Symbol;Acc:HGNC:24229]	groupXVII	9849698	9852173	1	0.438857	-0.718005	1.0297	2.59117	16.7887	0.000781094	0.00230118	12
ENSGACG00000017857	rpe65a	retinal pigment epithelium-specific protein 65a [Source:ZFIN;Acc:ZDB-GENE-040426-1717]	groupIII	16241440	16245486	1	-0.0758641	-2.8207	0.633653	1.60903	16.7722	0.000787231	0.002319	6
ENSGACG00000012138	vsx1	visual system homeobox 1 homolog, chx10-like [Source:ZFIN;Acc:ZDB-GENE-990415-205]	groupVI	16670943	16673485	-1	-1.12209	-6.85424	3.91756	-2.16433	16.7308	0.000802798	0.00236431	2
ENSGACG00000020473	vtnb	vitronectin b [Source:ZFIN;Acc:ZDB-GENE-041116-1]	groupVII	19070731	19075868	-1	-0.254253	-3.8161	2.67618	-1.89553	16.7271	0.000804181	0.00236825	4
ENSGACG00000007315	mpeg1	macrophage expressed 1 [Source:ZFIN;Acc:ZDB-GENE-030131-7347]	groupXIII	6521306	6524043	1	-0.0340709	-2.96502	2.04789	3.7876	16.7181	0.000807622	0.00237824	5
ENSGACG00000018007	csf1ra	colony stimulating factor 1 receptor, a [Source:ZFIN;Acc:ZDB-GENE-001205-1]	groupIV	10922842	10930745	1	-1.01677	-0.0896007	-0.475671	3.21743	16.7082	0.000811418	0.00238929	10
ENSGACG00000000971			scaffold_627	11418	11957	1	0.77337	2.98708	0.869839	1.89568	16.6988	0.000815043	0.00239982	8
ENSGACG00000016168	ACTC1 (4 of 4)	actin, alpha, cardiac muscle 1 [Source:HGNC Symbol;Acc:HGNC:143]	groupII	13640060	13643928	-1	-3.29583	-0.948805	-2.58852	1.77572	16.6685	0.000826806	0.00243418	3
ENSGACG00000020568	TRPC4 (2 of 2)	transient receptor potential cation channel, subfamily C, member 4 [Source:HGNC Symbol;Acc:HGNC:12336]	groupVII	20270318	20284895	-1	0.356192	0.532815	0.251768	5.71231	16.6677	0.000827136	0.00243501	10
ENSGACG00000018317	nr5a1b	nuclear receptor subfamily 5, group A, member 1b [Source:ZFIN;Acc:ZDB-GENE-040702-6]	groupXIV	13848579	13856678	-1	-5.07402	3.29162	-6.31479	-0.201553	16.6629	0.000829001	0.00244036	1
ENSGACG00000019087	SLC5A8	solute carrier family 5 (sodium/monocarboxylate cotransporter), member 8 [Source:HGNC Symbol;Acc:HGNC:19119]	groupIV	21532138	21536424	-1	1.17509	-3.49395	4.03955	-2.62323	16.6104	0.000849828	0.00250138	5
ENSGACG00000016771	MTFP1	mitochondrial fission process 1 [Source:HGNC Symbol;Acc:HGNC:26945]	groupXIV	5573576	5576033	1	-0.0415789	-0.210512	-0.914237	3.83868	16.5653	0.000868152	0.00255488	10
ENSGACG00000019503	tyrp1a	tyrosinase-related protein 1a [Source:ZFIN;Acc:ZDB-GENE-070718-2]	groupVII	5570406	5574779	-1	0.742599	-1.42975	0.653595	1.37025	16.5119	0.000890378	0.00261999	9
ENSGACG00000020776	PLEKHB1	pleckstrin homology domain containing, family B (evectins) member 1 [Source:HGNC Symbol;Acc:HGNC:19079]	groupVII	24890855	24892866	-1	-1.13751	-3.66563	2.33262	-1.32576	16.4741	0.00090643	0.00266691	4
ENSGACG00000019764	slc8a4b	solute carrier family 8 (sodium/calcium exchanger), member 4b [Source:ZFIN;Acc:ZDB-GENE-050809-103]	groupVII	7576613	7607584	-1	-0.00909783	0.373077	-0.0969191	4.91738	16.4663	0.000909762	0.00267657	10
ENSGACG00000011018	aldoca	aldolase C, fructose-bisphosphate, a [Source:ZFIN;Acc:ZDB-GENE-050706-128]	groupI	12131921	12135012	1	-1.69822	-2.44138	0.314245	4.99146	16.4284	0.000926219	0.00272483	13
ENSGACG00000018047	cabp4	calcium binding protein 4 [Source:ZFIN;Acc:ZDB-GENE-081104-291]	groupIX	9749653	9756743	-1	-0.362524	-3.91382	2.65421	-2.01205	16.3136	0.000977858	0.00287641	4
ENSGACG00000010691			scaffold_133	123185	130267	1	-0.0263554	-2.9897	2.00325	-0.564274	16.2931	0.000987366	0.00290405	5
ENSGACG00000015322	grk1a (2 of 2)	G protein-coupled receptor kinase 1 a [Source:ZFIN;Acc:ZDB-GENE-050823-1]	groupII	7743343	7748451	-1	0.095091	-3.30298	2.62414	-1.88926	16.2913	0.000988218	0.00290639	5
ENSGACG00000014432	pde6g	phosphodiesterase 6G, cGMP-specific, rod, gamma [Source:ZFIN;Acc:ZDB-GENE-030904-1]	scaffold_112	198492	200652	-1	-0.722327	-2.12207	1.40191	3.61332	16.2545	0.00100555	0.00295719	9
ENSGACG00000018599	tpm2	tropomyosin 2 (beta) [Source:ZFIN;Acc:ZDB-GENE-040625-114]	groupXIV	14793585	14812370	1	-1.1395	0.166478	-0.962465	2.12331	16.2482	0.00100854	0.00296566	3
ENSGACG00000019168	myh11a	myosin, heavy polypeptide 11, smooth muscle a [Source:ZFIN;Acc:ZDB-GENE-050531-1]	groupIX	15605566	15627045	-1	0.224034	-0.608373	-0.162993	5.89181	16.2312	0.00101667	0.00298921	11
ENSGACG00000020398	gc3	guanylyl cyclase 3 [Source:ZFIN;Acc:ZDB-GENE-011128-9]	groupVII	17965520	17974749	1	-0.0253871	-2.66167	1.53258	-0.136087	16.1641	0.00104944	0.00308486	6
ENSGACG00000000187			scaffold_268	12981	13712	1	-3.44127	1.7189	1.35105	-0.88135	16.1027	0.00108031	0.0031754	3
ENSGACG00000002054	si:ch211-53m15.2	si:ch211-53m15.2 [Source:ZFIN;Acc:ZDB-GENE-100922-24]	scaffold_250	28530	63337	-1	0.0783138	-1.96111	1.49384	-0.280151	15.861	0.00121089	0.00355864	6
ENSGACG00000001493			scaffold_27	4279624	4281366	1	0.195545	-0.203422	-0.475721	3.74035	15.851	0.0012166	0.00357519	10
ENSGACG00000005323	cacna1g	calcium channel, voltage-dependent, T type, alpha 1G subunit [Source:ZFIN;Acc:ZDB-GENE-090514-2]	groupV	6457076	6571528	-1	0.510771	0.149684	0.0529522	5.96649	15.7975	0.00124771	0.00366619	10
ENSGACG00000014764	sv2ba	synaptic vesicle glycoprotein 2 ba [Source:ZFIN;Acc:ZDB-GENE-070209-134]	groupII	4617301	4628451	-1	-0.0140624	-2.93221	2.06206	-0.0382127	15.7678	0.00126531	0.0037175	5
ENSGACG00000020178	crx	cone-rod homeobox [Source:ZFIN;Acc:ZDB-GENE-010403-1]	groupVII	12798591	12800846	1	0.0804443	-2.8547	1.66587	-0.0749123	15.763	0.00126818	0.0037257	6
ENSGACG00000013254	tpd52l1	tumor protein D52-like 1 [Source:ZFIN;Acc:ZDB-GENE-050522-121]	groupXVIII	15436938	15444996	1	0.2325	-0.773975	0.510709	2.54368	15.756	0.00127239	0.00373764	12
ENSGACG00000009762			groupX	15033533	15042028	1	0.724677	-0.713088	1.25263	-0.0311874	15.7056	0.00130295	0.0038272	12
ENSGACG00000020429	grk1b	G protein-coupled receptor kinase 1 b [Source:ZFIN;Acc:ZDB-GENE-050417-211]	groupVII	18425524	18436420	-1	-1.31267	-4.66275	3.26523	-2.36728	15.7005	0.00130613	0.00383633	4
ENSGACG00000005449			groupXXI	11300455	11304049	-1	-0.695553	-2.18234	1.61714	1.80313	15.6446	0.00134099	0.00393828	9
ENSGACG00000010707	RAX2 (1 of 2)	retina and anterior neural fold homeobox 2 [Source:HGNC Symbol;Acc:HGNC:18286]	groupVIII	13455374	13459166	1	0.668087	-4.51686	2.96969	-2.77281	15.5721	0.0013876	0.00407467	4
ENSGACG00000014535	cyp2n13	cytochrome P450, family 2, subfamily N, polypeptide 13 [Source:ZFIN;Acc:ZDB-GENE-041001-158]	groupVIII	19106719	19119924	1	1.14385	0.512018	1.73062	1.05154	15.5296	0.0014157	0.00415697	12
ENSGACG00000006331	samsn1a	SAM domain, SH3 domain and nuclear localisation signals, 1a [Source:ZFIN;Acc:ZDB-GENE-030131-8639]	groupI	3080902	3085572	1	0.0444451	-1.98793	1.21391	2.69475	15.5292	0.00141597	0.00415751	6
ENSGACG00000014312	ccl-c5a	chemokine CCL-C5a [Source:ZFIN;Acc:ZDB-GENE-060526-181]	groupXIII	18785076	18787210	-1	-0.0869266	-2.9399	1.97162	2.73931	15.4943	0.00143941	0.00422611	5
ENSGACG00000015912	tyrp1b	tyrosinase-related protein 1b [Source:ZFIN;Acc:ZDB-GENE-040718-249]	groupIX	263920	268621	-1	0.318141	-2.66459	1.21982	0.145758	15.3876	0.00151367	0.00444311	6
ENSGACG00000010287	opn1lw2	opsin 1 (cone pigments), long-wave-sensitive, 2 [Source:ZFIN;Acc:ZDB-GENE-040718-141]	groupXVII	10627091	10629553	1	-0.0106272	-6.43853	4.94301	2.82992	15.3709	0.00152564	0.00447774	2
ENSGACG00000015077	vwa5b2	von Willebrand factor A domain containing 5B2 [Source:ZFIN;Acc:ZDB-GENE-070912-216]	groupIII	6876875	6886320	-1	-1.27421	0.750218	-0.82081	1.97181	15.2792	0.00159295	0.00467474	3
ENSGACG00000013484			scaffold_196	93784	96468	-1	-0.14797	-4.07242	3.39187	-0.824691	15.2729	0.00159768	0.00468835	4
ENSGACG00000003339	IGFN1 (1 of 5)	immunoglobulin-like and fibronectin type III domain containing 1 [Source:HGNC Symbol;Acc:HGNC:24607]	groupXII	1940635	1947412	1	-2.67106	0.472988	-1.78718	-1.59556	15.2569	0.00160976	0.00472355	3
ENSGACG00000008338	lrit2	leucine-rich repeat, immunoglobulin-like and transmembrane domains 2 [Source:ZFIN;Acc:ZDB-GENE-050522-160]	groupVI	9590155	9593047	1	-0.435089	-3.99902	2.51716	-2.12872	15.2559	0.00161054	0.00472557	4
ENSGACG00000011006	fscn2a	fascin homolog 2, actin-bundling protein, retinal (Strongylocentrotus purpuratus) a [Source:ZFIN;Acc:ZDB-GENE-110901-1]	groupXI	9024039	9028104	1	-0.0844181	-2.42863	1.29149	-0.455836	15.1515	0.00169168	0.00496166	6
ENSGACG00000015763			scaffold_135	8651	19562	-1	0.255679	2.97216	1.41377	-0.838688	15.1349	0.00170496	0.00500031	8
ENSGACG00000011259	CAMKK1 (1 of 2)	calcium/calmodulin-dependent protein kinase kinase 1, alpha [Source:HGNC Symbol;Acc:HGNC:1469]	groupI	12361944	12367073	-1	0.416861	-0.980745	1.31957	0.61707	15.1242	0.00171351	0.00502493	12
ENSGACG00000017171	TMEM138 (2 of 2)	transmembrane protein 138 [Source:HGNC Symbol;Acc:HGNC:26944]	groupII	21242641	21248311	1	-0.264889	-2.54017	1.49239	-0.92556	15.1242	0.00171355	0.00502493	6
ENSGACG00000017360	CD274	CD274 molecule [Source:HGNC Symbol;Acc:HGNC:17635]	groupXIV	7425305	7428114	-1	0.544345	-3.35859	2.75941	-0.413263	15.1148	0.00172112	0.00504655	5
ENSGACG00000011982	guca1c	guanylate cyclase activator 1C [Source:ZFIN;Acc:ZDB-GENE-030829-1]	groupI	14461065	14463469	1	-0.838405	-3.96223	3.3436	-2.19732	15.1112	0.00172404	0.00505482	4
ENSGACG00000005618			groupXIX	7085211	7089607	-1	0.0376929	-2.21722	3.11785	-1.32236	15.1091	0.00172572	0.00505945	5
ENSGACG00000016838			groupIII	12158680	12160523	-1	0.185858	-5.61977	4.29621	-2.59246	15.0194	0.00180015	0.00527586	2
ENSGACG00000013108	tmem244	transmembrane protein 244 [Source:ZFIN;Acc:ZDB-GENE-040724-54]	groupXVIII	15127359	15130036	-1	0.372485	-3.00847	3.09702	-2.3016	15.0189	0.00180059	0.00527685	5
ENSGACG00000018505	slc1a3b	solute carrier family 1 (glial high affinity glutamate transporter), member 3b [Source:ZFIN;Acc:ZDB-GENE-090708-3]	groupXIV	14490135	14500817	-1	-1.27959	-1.59161	-0.163952	4.69995	15.0125	0.00180604	0.00529251	13
ENSGACG00000010119	nexn	nexilin (F actin binding protein) [Source:ZFIN;Acc:ZDB-GENE-041114-92]	groupVIII	12857578	12864611	1	-0.846589	-1.73156	-0.736907	1.98478	14.9335	0.00187436	0.00549147	13
ENSGACG00000013256	OSBPL1A (2 of 2)	oxysterol binding protein-like 1A [Source:HGNC Symbol;Acc:HGNC:16398]	groupIII	1085397	1100278	1	-0.232593	-0.536374	0.0487446	5.92934	14.8621	0.00193837	0.00567773	11
ENSGACG00000018010	TMC2 (2 of 2)	transmembrane channel-like 2 [Source:HGNC Symbol;Acc:HGNC:16527]	groupXIV	10689883	10694722	-1	0.107535	-0.993794	1.80475	-0.863622	14.845	0.00195403	0.00572327	12
ENSGACG00000001222	PLCH2 (1 of 2)	phospholipase C, eta 2 [Source:HGNC Symbol;Acc:HGNC:29037]	scaffold_27	3523389	3526548	1	-0.696639	-1.69952	0.115386	0.900757	14.796	0.00199951	0.00585613	13
ENSGACG00000014315	ccl19	chemokine (C-C motif) ligand 19 [Source:ZFIN;Acc:ZDB-GENE-091204-19]	groupXIII	18789994	18791021	-1	-1.80614	-2.90714	2.4673	0.567679	14.769	0.00202504	0.0059299	9
ENSGACG00000018021	alad	aminolevulinate dehydratase [Source:ZFIN;Acc:ZDB-GENE-050417-123]	groupXIV	10781663	10786748	-1	0.00834535	-0.186812	0.502363	3.60139	14.746	0.00204711	0.00599317	12
ENSGACG00000018416			groupIX	12143032	12164384	-1	-1.18968	-1.2962	-0.16787	1.14382	14.7219	0.00207038	0.00606023	13
ENSGACG00000000336			scaffold_131	56853	59742	1	0.437651	-1.37904	1.12771	2.13348	14.6997	0.00209209	0.00612239	9
ENSGACG00000016413	pstpip1b	proline-serine-threonine phosphatase interacting protein 1b [Source:ZFIN;Acc:ZDB-GENE-051127-25]	groupII	15242814	15247792	1	-0.191007	-2.72146	2.10863	1.30735	14.6167	0.00217536	0.00636535	5
ENSGACG00000010482	zpld1b	zona pellucida-like domain containing 1b [Source:ZFIN;Acc:ZDB-GENE-121214-104]	groupI	10940398	10945182	-1	0.459922	-0.725906	2.34373	-1.0568	14.597	0.0021955	0.00642355	9
ENSGACG00000007054	rlbp1b	retinaldehyde binding protein 1b [Source:ZFIN;Acc:ZDB-GENE-040426-1870]	groupXIX	8197387	8201198	1	-0.697465	-2.22964	0.837985	2.05021	14.563	0.00223083	0.00652655	9
ENSGACG00000013999	abcc4 (4 of 4)	ATP-binding cassette, sub-family C (CFTR/MRP), member 4 [Source:ZFIN;Acc:ZDB-GENE-030616-511]	groupI	20717715	20732805	-1	-0.108682	-0.563185	0.176531	3.66287	14.4273	0.00237762	0.00695361	11
ENSGACG00000002489	galm	galactose mutarotase [Source:ZFIN;Acc:ZDB-GENE-040718-66]	groupVI	792678	797452	1	0.453131	-0.0134291	0.148382	5.03992	14.3963	0.00241251	0.00705486	10
ENSGACG00000015571	si:rp71-39b20.4	si:rp71-39b20.4 [Source:ZFIN;Acc:ZDB-GENE-070912-704]	groupIII	8494405	8499478	1	0.202357	-3.34468	2.81327	-1.53252	14.3788	0.0024324	0.00711222	5
ENSGACG00000018690	EPS8L2 (3 of 3)	EPS8-like 2 [Source:HGNC Symbol;Acc:HGNC:21296]	scaffold_654	2701	6301	1	-0.283513	-0.905157	0.233154	2.27595	14.3372	0.0024803	0.00725105	11
ENSGACG00000013631	zgc:110789 (2 of 2)	zgc:110789 [Source:ZFIN;Acc:ZDB-GENE-050306-38]	groupXIX	18634336	18638892	-1	0.232897	-1.98197	0.961892	1.60568	14.3298	0.00248896	0.00727593	6
ENSGACG00000014554	cdc14aa	CDC14 cell division cycle 14 homolog A, a [Source:ZFIN;Acc:ZDB-GENE-040426-1214]	groupIII	5045318	5054197	1	-0.0021738	-4.79812	3.17722	-1.96552	14.3158	0.00250538	0.00732352	4
ENSGACG00000000246	scg2a	secretogranin II (chromogranin C) a [Source:ZFIN;Acc:ZDB-GENE-030131-8214]	scaffold_175	127469	130825	-1	-0.304469	0.155484	0.343115	5.96529	14.3002	0.00252378	0.00737646	10
ENSGACG00000019991	dock11 (1 of 2)	dedicator of cytokinesis 11 [Source:ZFIN;Acc:ZDB-GENE-060503-196]	groupVII	9281432	9306866	1	-0.122046	-0.450142	-0.482704	4.91814	14.2913	0.00253428	0.00740673	11
ENSGACG00000015420	IMPG2 (2 of 2)	interphotoreceptor matrix proteoglycan 2 [Source:HGNC Symbol;Acc:HGNC:18362]	groupI	27380885	27398176	-1	-0.0526041	-3.62116	2.05085	-1.36832	14.2278	0.00261097	0.00762956	5
ENSGACG00000002618	nop16 (1 of 4)	NOP16 nucleolar protein homolog (yeast) [Source:ZFIN;Acc:ZDB-GENE-040718-267]	groupVI	1041607	1044896	1	0.47335	0.0409711	-0.620963	3.22341	14.221	0.00261924	0.00765287	10
ENSGACG00000005997	crhbp (1 of 2)	corticotropin releasing hormone binding protein [Source:ZFIN;Acc:ZDB-GENE-040801-196]	groupXIII	4453104	4457797	-1	-1.00004	-0.0232359	0.0637019	3.62251	14.2093	0.00263372	0.00769473	10
ENSGACG00000014002	RS1 (1 of 2)	retinoschisin 1 [Source:HGNC Symbol;Acc:HGNC:10457]	groupVIII	18201928	18205258	-1	-0.0583078	-2.53643	1.88568	0.82307	14.2037	0.00264058	0.00771434	6
ENSGACG00000014031	CASQ2 (2 of 2)	calsequestrin 2 (cardiac muscle) [Source:HGNC Symbol;Acc:HGNC:1513]	groupI	20745440	20751111	1	-1.44355	-2.01291	-0.14747	5.04726	14.2035	0.0026408	0.00771452	13
ENSGACG00000006693	NT5C1A (1 of 2)	5'-nucleotidase, cytosolic IA [Source:HGNC Symbol;Acc:HGNC:17819]	groupXV	2973149	2977521	1	0.0801904	-0.19924	0.425694	4.47432	14.1172	0.00274989	0.00803002	12
ENSGACG00000010643	BPIFC (2 of 3)	BPI fold containing family C [Source:HGNC Symbol;Acc:HGNC:16503]	groupXVII	10920133	10925973	1	0.517917	-2.35139	1.65459	3.93168	14.0934	0.00278076	0.00811878	6
ENSGACG00000006241	bpifcl	BPI fold containing family C, like [Source:ZFIN;Acc:ZDB-GENE-070912-360]	groupXII	7629631	7634937	-1	-0.226479	-2.32033	0.923002	3.12422	14.0684	0.00281345	0.00821374	9
ENSGACG00000017359			groupXIV	7422416	7423357	-1	0.614274	-2.99054	2.50322	-0.117598	14.0305	0.00286399	0.00836035	5
ENSGACG00000016312	PPEF2 (2 of 2)	protein phosphatase, EF-hand calcium binding domain 2 [Source:HGNC Symbol;Acc:HGNC:9244]	groupXIV	3566771	3571508	-1	0.108988	-2.56705	2.01648	-0.717676	13.9551	0.00296693	0.00865839	6
ENSGACG00000019997	dock11 (2 of 2)	dedicator of cytokinesis 11 [Source:ZFIN;Acc:ZDB-GENE-060503-196]	groupVII	9311356	9318824	1	-0.0970588	-0.483323	-0.377711	4.19976	13.885	0.003066	0.00894545	11
ENSGACG00000012174			groupXI	11252519	11253786	1	-2.88683	-1.22869	-3.09112	1.46819	13.8758	0.00307915	0.00898228	3
ENSGACG00000015943	cyba	cytochrome b-245, alpha polypeptide [Source:ZFIN;Acc:ZDB-GENE-040426-1526]	groupII	11965672	11968093	1	0.124131	-1.97324	1.50727	3.23326	13.8747	0.00308076	0.00898648	6
ENSGACG00000019960	PTGDR2 (3 of 3)	prostaglandin D2 receptor 2 [Source:HGNC Symbol;Acc:HGNC:4502]	groupVII	9012344	9013414	-1	0.441113	-2.48489	0.117914	-0.664905	13.853	0.00311227	0.0090779	6
ENSGACG00000012747			groupI	16528308	16530918	1	1.53234	-2.20032	3.26945	-1.84054	13.8272	0.00315007	0.00918761	5
ENSGACG00000005740			groupV	7636119	7639426	1	0.369192	-3.05786	1.77412	-1.88481	13.7721	0.00323229	0.00942581	5
ENSGACG00000003186	spice1	spindle and centriole associated protein 1 [Source:ZFIN;Acc:ZDB-GENE-041212-64]	groupXXI	7677215	7682182	1	-1.01385	0.526611	-0.168804	3.08641	13.7631	0.003246	0.00946472	10
ENSGACG00000001611	FAM132B	family with sequence similarity 132, member B [Source:HGNC Symbol;Acc:HGNC:26727]	scaffold_120	164636	167247	1	0.411913	-1.40963	-0.371784	1.50746	13.7447	0.00327407	0.00954601	7
ENSGACG00000006376	desma	desmin a [Source:ZFIN;Acc:ZDB-GENE-980526-221]	groupXVI	12208794	12214806	-1	-3.08789	1.84747	0.233107	-0.345008	13.74	0.00328125	0.0095664	3
ENSGACG00000014579	ccr12.3	chemokine (C-C motif) receptor 12.3 [Source:ZFIN;Acc:ZDB-GENE-060503-97]	groupIII	5109655	5111039	1	0.482048	-2.24924	1.25739	2.81546	13.7297	0.0032972	0.00961184	6
ENSGACG00000000456	DGKA (1 of 2)	diacylglycerol kinase, alpha 80kDa [Source:HGNC Symbol;Acc:HGNC:2849]	scaffold_27	936401	947212	-1	-1.10999	-0.807896	1.0591	1.61061	13.7202	0.00331183	0.00965394	9
ENSGACG00000020024	epdl1	ependymin-like 1 [Source:ZFIN;Acc:ZDB-GENE-090710-3]	groupVII	9408874	9410882	-1	0.299036	-1.71698	1.13163	2.78288	13.6536	0.00341661	0.00995766	9
ENSGACG00000014611	il1b	interleukin 1, beta [Source:ZFIN;Acc:ZDB-GENE-040702-2]	groupXIII	19421923	19423566	1	-0.314412	-3.8844	1.85089	-0.423447	13.6432	0.00343329	0.0100051	5
ENSGACG00000007225	gpn2	GPN-loop GTPase 2 [Source:ZFIN;Acc:ZDB-GENE-041010-86]	groupXX	8139823	8143249	1	0.14846	-0.445716	-0.132016	3.39225	13.6318	0.00345174	0.0100572	11
ENSGACG00000010159	gmip	GEM interacting protein [Source:ZFIN;Acc:ZDB-GENE-130530-823]	groupXI	7900410	7907548	-1	0.0479208	-1.75207	0.894877	0.838681	13.6029	0.00349863	0.0101926	9
ENSGACG00000000326			scaffold_395	11467	15104	-1	0.0933575	-1.4897	1.49148	3.13569	13.598	0.00350662	0.0102148	9
ENSGACG00000018046	cnot6	CCR4-NOT transcription complex, subunit 6 [Source:ZFIN;Acc:ZDB-GENE-030131-2768]	groupIV	11092615	11102092	1	-0.412193	-0.443447	0.0287126	3.76401	13.5026	0.00366662	0.0106766	11
ENSGACG00000001229			scaffold_27	3529522	3534482	-1	-0.80081	-1.66158	-0.59035	6.59607	13.4922	0.0036845	0.0107281	13
ENSGACG00000001837			groupX	16269	20746	-1	-0.300123	-1.51232	1.37518	1.21473	13.4879	0.00369197	0.0107492	9
ENSGACG00000001587	MFN1 (1 of 2)	mitofusin 1 [Source:HGNC Symbol;Acc:HGNC:18262]	scaffold_120	151321	166112	-1	0.25121	-0.970481	0.545391	1.77347	13.4809	0.00370411	0.0107839	12
ENSGACG00000017794	parp2	poly (ADP-ribose) polymerase family, member 2 [Source:ZFIN;Acc:ZDB-GENE-031113-6]	groupIII	16016919	16023748	-1	0.21818	-0.245954	-0.306853	3.84369	13.4335	0.00378709	0.0110237	10
ENSGACG00000003658	hck	hemopoietic cell kinase [Source:ZFIN;Acc:ZDB-GENE-090313-72]	groupXII	2607678	2614561	1	-0.0450406	-1.99079	1.22064	3.23582	13.4214	0.00380854	0.0110848	6
ENSGACG00000016134	hsd17b7	hydroxysteroid (17-beta) dehydrogenase 7 [Source:ZFIN;Acc:ZDB-GENE-061013-378]	groupIII	9564767	9568355	1	-0.980119	-0.0381218	-0.170935	3.15044	13.4185	0.00381361	0.011099	10
ENSGACG00000018429			groupIX	12187897	12189566	-1	0.418474	-1.33501	1.64336	2.70212	13.41	0.00382877	0.0111425	9
ENSGACG00000017060	NR2E3 (2 of 2)	nuclear receptor subfamily 2, group E, member 3 [Source:HGNC Symbol;Acc:HGNC:7974]	groupII	19644637	19647506	1	-0.293454	-2.54909	1.25999	-0.66391	13.354	0.00393037	0.0114329	6
ENSGACG00000019649	cdca9	cell division cycle associated 9 [Source:ZFIN;Acc:ZDB-GENE-090706-4]	groupVII	6895937	6897883	-1	-1.9163	0.794168	-0.376082	3.19922	13.3485	0.0039405	0.0114611	3
ENSGACG00000013509	aldh3a2a	aldehyde dehydrogenase 3 family, member A2a [Source:ZFIN;Acc:ZDB-GENE-040718-74]	groupI	18381599	18387921	-1	-0.0977633	-0.284966	0.336444	3.74664	13.3352	0.00396505	0.0115318	12
ENSGACG00000001741	s100a1	S100 calcium binding protein A1 [Source:ZFIN;Acc:ZDB-GENE-040916-1]	scaffold_122	177846	178506	-1	0.0293975	-1.47579	2.48026	-1.56537	13.3316	0.0039718	0.0115502	9
ENSGACG00000001620	lrrfip1a	leucine rich repeat (in FLII) interacting protein 1a [Source:ZFIN;Acc:ZDB-GENE-030131-99]	groupXVI	2173129	2210140	1	-0.115361	-0.494898	0.137341	3.37756	13.2997	0.00403138	0.0117214	11
ENSGACG00000018102			groupIV	11445867	11446591	1	0.14764	-0.641351	0.528778	1.50055	13.2722	0.0040835	0.0118716	12
ENSGACG00000019986	guca1a	guanylate cyclase activator 1A [Source:ZFIN;Acc:ZDB-GENE-011128-5]	groupIV	31583796	31584431	-1	-0.929921	-5.82872	3.5642	-0.467845	13.2565	0.00411341	0.0119579	2
ENSGACG00000001123			scaffold_129	47228	50569	-1	0.0804939	-1.48661	1.41389	4.70543	13.2228	0.00417873	0.0121464	9
ENSGACG00000010141			groupXIII	9880102	9881725	-1	-0.628212	-0.508562	-0.219414	6.75883	13.2217	0.0041809	0.0121521	11
ENSGACG00000019826	C3 (8 of 8)	complement component 3 [Source:HGNC Symbol;Acc:HGNC:1318]	groupIX	19651307	19670618	1	1.1143	-1.80202	-0.124066	3.56181	13.1458	0.00433177	0.0125877	7
ENSGACG00000020778	tecta	tectorin alpha [Source:ZFIN;Acc:ZDB-GENE-110411-120]	groupVII	24910348	24922434	1	0.195097	-0.872109	1.49537	0.535786	13.0384	0.00455432	0.0132292	12
ENSGACG00000001756			scaffold_172	30858	31670	1	3.32078	-2.68074	-0.5893	-1.49628	13.0034	0.00462923	0.0134453	7
ENSGACG00000011263	SDS	serine dehydratase [Source:HGNC Symbol;Acc:HGNC:10691]	groupXIII	12814874	12817907	1	-1.65337	-0.375891	1.06209	1.80276	13.0021	0.00463199	0.0134525	9
ENSGACG00000015864	slc4a4b	solute carrier family 4, sodium bicarbonate cotransporter, member 4b [Source:ZFIN;Acc:ZDB-GENE-091030-1]	groupXIV	1689166	1703994	-1	-0.185761	-0.921807	0.696254	1.30986	12.9617	0.00472017	0.0137055	12
ENSGACG00000006630	syt5a	synaptotagmin Va [Source:ZFIN;Acc:ZDB-GENE-040718-110]	groupXI	3252489	3260038	-1	-0.0916311	-1.80907	1.60028	0.53425	12.941	0.00476603	0.0138371	6
ENSGACG00000014599			groupXIII	19365872	19378410	-1	-0.276282	-2.04962	-0.720705	2.78918	12.9278	0.00479536	0.0139214	13
ENSGACG00000010196			groupXII	12771425	12775389	-1	0.391585	1.12271	-0.22694	3.25851	12.9072	0.0048417	0.0140544	8
ENSGACG00000003551			groupXVII	817933	818885	-1	0.198461	-1.95813	1.31738	3.98945	12.891	0.00487831	0.0141599	6
ENSGACG00000018430			groupIX	12189816	12192031	-1	0.426341	-1.65369	1.60775	2.78048	12.8713	0.00492345	0.0142885	9
ENSGACG00000020876	irf1b	interferon regulatory factor 1b [Source:ZFIN;Acc:ZDB-GENE-041114-13]	groupVII	27201860	27205236	-1	-0.159629	-1.325	0.857466	3.89732	12.8683	0.0049303	0.0143075	9
ENSGACG00000016473	prlra	prolactin receptor a [Source:ZFIN;Acc:ZDB-GENE-080103-2]	groupXIV	3993506	3998272	1	-0.401066	-0.895605	0.541381	1.0919	12.8621	0.00494442	0.0143469	12
ENSGACG00000011666			groupXX	12640361	12642597	-1	1.36396	-3.52835	1.34634	-0.855921	12.851	0.00497013	0.0144207	5
ENSGACG00000002463	LRIT2 (1 of 2)	leucine-rich repeat, immunoglobulin-like and transmembrane domains 2 [Source:HGNC Symbol;Acc:HGNC:23443]	groupV	1032071	1033963	-1	-0.957726	-3.61032	3.1859	-2.70081	12.8464	0.00498086	0.014451	4
ENSGACG00000019298	myh9a	myosin, heavy polypeptide 9a, non-muscle [Source:ZFIN;Acc:ZDB-GENE-030131-5870]	groupIX	16378336	16393085	-1	0.0153768	-1.42297	1.08176	3.76834	12.7468	0.00521735	0.0151337	9
ENSGACG00000006215	PKN1 (1 of 2)	protein kinase N1 [Source:HGNC Symbol;Acc:HGNC:9405]	groupXI	2627552	2637707	-1	-0.24841	-0.708383	0.0829764	4.96451	12.7408	0.00523192	0.0151751	11
ENSGACG00000001509	MSR1	macrophage scavenger receptor 1 [Source:HGNC Symbol;Acc:HGNC:7376]	groupXVI	403151	408474	1	0.412246	-2.31377	1.57237	2.56202	12.7039	0.00532266	0.0154374	6
ENSGACG00000005326	TMEM87B	transmembrane protein 87B [Source:HGNC Symbol;Acc:HGNC:25913]	groupVI	6286183	6292232	1	-0.801979	-0.0727191	0.324389	5.26365	12.6865	0.00536615	0.0155627	10
ENSGACG00000018570	TPPP2	tubulin polymerization-promoting protein family member 2 [Source:HGNC Symbol;Acc:HGNC:19293]	groupIX	13061442	13063917	1	0.282432	-0.14969	-0.296117	8.2346	12.6562	0.00544217	0.0157796	10
ENSGACG00000012954	tnnc1b	troponin C type 1b (slow) [Source:ZFIN;Acc:ZDB-GENE-040625-62]	groupXII	17267202	17271644	-1	-3.46462	-2.30835	-2.36732	-1.55654	12.5904	0.00561153	0.016267	3
ENSGACG00000012885	slc17a7	solute carrier family 17 (sodium-dependent inorganic phosphate cotransporter), member 7 [Source:ZFIN;Acc:ZDB-GENE-050105-5]	groupXI	12552544	12563853	1	-0.52127	-1.20484	-0.18823	4.87139	12.5729	0.00565753	0.0163994	13
ENSGACG00000008655	cadps2	Ca2+-dependent activator protein for secretion 2 [Source:ZFIN;Acc:ZDB-GENE-030903-1]	groupXIX	9666876	9737045	-1	0.205922	0.220072	-0.366712	4.59991	12.5612	0.00568847	0.0164882	10
ENSGACG00000016954	myo1hb	myosin IHb [Source:ZFIN;Acc:ZDB-GENE-070705-355]	groupXIV	6519341	6527036	-1	-0.614135	-1.12098	1.32952	-0.918416	12.5563	0.0057012	0.0165232	9
ENSGACG00000011827	cebpb	CCAAT/enhancer binding protein (C/EBP), beta [Source:ZFIN;Acc:ZDB-GENE-020111-3]	groupXII	15595557	15596471	1	-0.0735371	-1.50203	1.23927	1.78086	12.5547	0.00570569	0.0165352	9
ENSGACG00000013151	tm6sf2	transmembrane 6 superfamily member 2 [Source:ZFIN;Acc:ZDB-GENE-060503-338]	groupVIII	17096123	17103943	-1	-0.612854	-3.37036	1.11596	-1.20013	12.5476	0.00572452	0.0165879	6
ENSGACG00000010000			groupXI	7761756	7772062	1	0.00892858	-1.96651	-0.341352	-0.361824	12.5435	0.00573541	0.0166186	13
ENSGACG00000000137	psmb9a (3 of 5)	proteasome (prosome, macropain) subunit, beta type, 9a [Source:ZFIN;Acc:ZDB-GENE-990415-140]	scaffold_58	980864	982668	-1	-0.56144	-1.64531	1.99994	0.0127252	12.5429	0.00573709	0.0166225	9
ENSGACG00000008609	tysnd1	trypsin domain containing 1 [Source:ZFIN;Acc:ZDB-GENE-030131-8525]	groupVI	9844742	9847517	-1	-0.220833	-0.764154	0.697518	2.95659	12.5389	0.00574769	0.0166523	12
ENSGACG00000017944	CHRNA9 (2 of 2)	cholinergic receptor, nicotinic, alpha 9 (neuronal) [Source:HGNC Symbol;Acc:HGNC:14079]	groupIV	10570521	10573907	-1	-0.844105	-1.75298	0.160179	1.30595	12.5063	0.00583542	0.0169026	13
ENSGACG00000008819			groupXX	10254332	10256022	-1	0.163312	-1.71379	1.3329	4.28633	12.5056	0.00583736	0.0169073	9
ENSGACG00000016788	DCAF8	DDB1 and CUL4 associated factor 8 [Source:HGNC Symbol;Acc:HGNC:24891]	groupIII	11810330	11813930	1	-0.420283	-0.0724441	-0.0433202	5.22649	12.4942	0.00586847	0.0169955	10
ENSGACG00000015495			groupIII	8263705	8266565	1	-0.345089	-1.71766	1.19531	-0.373004	12.4825	0.00590043	0.0170861	9
ENSGACG00000015396	ca7	carbonic anhydrase VII [Source:ZFIN;Acc:ZDB-GENE-040426-1786]	groupII	8245986	8250854	-1	0.157117	-2.5619	1.79079	-1.46277	12.4305	0.00604486	0.0175004	6
ENSGACG00000002238			groupXVI	4679752	4681582	-1	1.00259	-0.511325	-0.328419	2.15907	12.4014	0.00612718	0.0177347	10
ENSGACG00000014486	rcvrna	recoverin a [Source:ZFIN;Acc:ZDB-GENE-050913-106]	groupXI	15457704	15459096	-1	-0.127176	-2.653	1.47884	1.18034	12.3838	0.0061777	0.0178779	6
ENSGACG00000007933	C4B	complement component 4B (Chido blood group) [Source:HGNC Symbol;Acc:HGNC:1324]	groupXX	9276661	9289490	-1	0.122357	-1.21907	1.24062	4.90843	12.3808	0.00618624	0.0179016	9
ENSGACG00000008675			groupV	10710008	10712315	-1	0.306739	-2.14084	1.08624	2.01298	12.3759	0.0062005	0.0179419	6
ENSGACG00000009040			groupX	13788630	13791322	-1	0.136998	0.374173	0.161404	3.48645	12.3571	0.00625495	0.0180984	10
ENSGACG00000020305	myo18aa	myosin XVIIIAa [Source:ZFIN;Acc:ZDB-GENE-080425-5]	groupVII	16142592	16192711	1	-0.152659	-0.167249	-0.542153	4.47482	12.3213	0.0063597	0.0183953	10
ENSGACG00000015537	cybb	cytochrome b-245, beta polypeptide (chronic granulomatous disease) [Source:ZFIN;Acc:ZDB-GENE-040426-1380]	groupI	27696441	27700661	1	0.207625	-2.21467	0.509806	4.20607	12.2523	0.00656689	0.0189882	6
ENSGACG00000001181	GUCY2D (1 of 2)	guanylate cyclase 2D, membrane (retina-specific) [Source:HGNC Symbol;Acc:HGNC:4689]	scaffold_129	206279	224515	-1	-0.176214	-1.51786	1.44244	1.37606	12.2489	0.00657725	0.019016	9
ENSGACG00000007439	dlgap3	discs, large (Drosophila) homolog-associated protein 3 [Source:ZFIN;Acc:ZDB-GENE-060503-413]	groupX	11228435	11239167	1	0.0841981	0.246719	-0.303995	4.03657	12.2214	0.00666209	0.0192591	10
ENSGACG00000010949	KLHDC8A	kelch domain containing 8A [Source:HGNC Symbol;Acc:HGNC:25573]	groupXVII	11300739	11308630	-1	0.249366	0.32594	0.244586	4.02365	12.2149	0.00668224	0.0193162	10
ENSGACG00000020188	dscama	Down syndrome cell adhesion molecule a [Source:ZFIN;Acc:ZDB-GENE-050310-7]	groupVII	13116224	13176677	1	0.194283	0.111817	-0.299082	6.13352	12.1659	0.0068359	0.019756	10
ENSGACG00000013629	tp63	tumor protein p63 [Source:ZFIN;Acc:ZDB-GENE-030819-1]	groupVIII	17661358	17672599	1	1.30089	-1.16695	1.19061	0.0575843	12.1104	0.00701432	0.0202671	12
ENSGACG00000008002	fam213aa	family with sequence similarity 213, member Aa [Source:ZFIN;Acc:ZDB-GENE-030131-2459]	groupVI	9291260	9297236	1	-0.539914	0.0534771	0.186778	5.03797	12.1058	0.00702951	0.0203098	10
ENSGACG00000019296	slc25a38b	solute carrier family 25, member 38b [Source:ZFIN;Acc:ZDB-GENE-110214-1]	groupIX	16371698	16376549	-1	0.388689	-0.513283	-0.173877	3.37296	12.1039	0.00703562	0.0203263	11
ENSGACG00000000702	neurod4 (1 of 2)	neurogenic differentiation 4 [Source:ZFIN;Acc:ZDB-GENE-030730-1]	scaffold_27	1858001	1858993	1	0.134296	-2.69103	1.35616	-1.3907	12.0964	0.00706013	0.020396	6
ENSGACG00000013667	lgals9l1	lectin, galactoside-binding, soluble, 9 (galectin 9)-like 1 [Source:ZFIN;Acc:ZDB-GENE-030131-9543]	groupI	19630729	19638360	1	0.094455	-1.23248	1.27527	4.20264	12.0888	0.00708493	0.0204642	9
ENSGACG00000014845	olfml2bb	olfactomedin-like 2Bb [Source:ZFIN;Acc:ZDB-GENE-070912-266]	groupIII	5978529	5985941	1	-0.382337	0.378618	-0.63662	3.1072	12.0599	0.0071809	0.020739	10
ENSGACG00000001226			scaffold_27	3527015	3528373	1	-0.638911	-1.6043	0.0250024	0.293876	12.0075	0.0073575	0.0212419	13
ENSGACG00000001939	C14orf159	chromosome 14 open reading frame 159 [Source:HGNC Symbol;Acc:HGNC:20498]	scaffold_128	80257	89042	-1	0.00173843	0.417142	-0.594456	5.39478	11.9901	0.00741708	0.0214115	10
ENSGACG00000017758			scaffold_137	194757	195795	-1	-1.03175	-1.60934	-1.06651	1.71747	11.9521	0.00754919	0.0217892	13
ENSGACG00000001525	slc4a2a (1 of 2)	solute carrier family 4, anion exchanger, member 2a [Source:ZFIN;Acc:ZDB-GENE-051101-2]	scaffold_120	71310	75550	1	-3.05301	2.13564	-1.9284	-0.508323	11.9491	0.00755971	0.0218183	3
ENSGACG00000003132	si:ch211-141h20.6	si:ch211-141h20.6 [Source:ZFIN;Acc:ZDB-GENE-110411-271]	groupVIII	885611	890667	1	0.984139	-6.23224	1.7734	-0.851599	11.8903	0.00776842	0.0224182	5
ENSGACG00000015319	TMEM255B	transmembrane protein 255B [Source:HGNC Symbol;Acc:HGNC:28297]	groupII	7730342	7741546	-1	-0.217816	-1.46488	1.27255	-0.541363	11.8893	0.00777208	0.0224275	9
ENSGACG00000014968	GABRA5 (2 of 2)	gamma-aminobutyric acid (GABA) A receptor, alpha 5 [Source:HGNC Symbol;Acc:HGNC:4079]	groupI	23675848	23692437	-1	0.0386967	0.296205	0.136604	5.07163	11.8802	0.0078051	0.0225204	10
ENSGACG00000019378	tp53	tumor protein p53 [Source:ZFIN;Acc:ZDB-GENE-990415-270]	groupVII	4324272	4329205	-1	0.0990418	-0.267814	0.260438	4.5439	11.8725	0.007833	0.0225995	12
ENSGACG00000003911	plxna1	plexin A1 [Source:ZFIN;Acc:ZDB-GENE-061007-1]	groupXIX	5234537	5263312	1	-0.405752	-0.652943	-0.0311773	5.29423	11.8618	0.00787195	0.0227093	11
ENSGACG00000014991	grin2ca	glutamate receptor, ionotropic, N-methyl D-aspartate 2Ca [Source:ZFIN;Acc:ZDB-GENE-070822-3]	groupXI	16517543	16541156	-1	-0.613847	-1.09893	-0.0121721	3.36061	11.8215	0.00802016	0.0231329	13
ENSGACG00000001665	pparg	peroxisome proliferator activated receptor gamma [Source:ZFIN;Acc:ZDB-GENE-990415-213]	scaffold_27	4856585	4866605	1	0.260976	-1.30604	0.872986	2.42126	11.8048	0.00808255	0.023309	9
ENSGACG00000000464	tat	tyrosine aminotransferase [Source:ZFIN;Acc:ZDB-GENE-030131-1144]	scaffold_163	104983	110801	1	-1.46109	-1.06381	0.694821	1.314	11.7973	0.00811074	0.0233876	9
ENSGACG00000015565	bin1	bridging integrator 1 [Source:ZFIN;Acc:ZDB-GENE-030425-1]	groupI	27729774	27738108	1	0.189497	-0.935652	0.438936	1.5568	11.7649	0.00823344	0.0237388	12
ENSGACG00000006539	myl1	myosin, light chain 1, alkali; skeletal, fast [Source:ZFIN;Acc:ZDB-GENE-030131-8109]	groupXVI	12804559	12809401	1	-2.17	-0.483922	-1.35893	-0.128771	11.7606	0.00824977	0.0237832	3
ENSGACG00000011525	KIF25	kinesin family member 25 [Source:HGNC Symbol;Acc:HGNC:6390]	groupXVIII	11759154	11766151	1	-0.610029	-1.61863	1.2903	-0.302905	11.7596	0.00825372	0.0237932	9
ENSGACG00000007239	PAQR4 (1 of 2)	progestin and adipoQ receptor family member IV [Source:HGNC Symbol;Acc:HGNC:26386]	groupV	9473672	9476294	1	0.195283	-6.2265	4.31784	-2.16291	11.7595	0.00825424	0.0237934	2
ENSGACG00000003888	eng2b	engrailed 2b [Source:ZFIN;Acc:ZDB-GENE-980526-40]	groupXXI	8942991	8945741	1	-0.359566	-0.63183	-0.459326	2.66424	11.7575	0.00826187	0.0238141	11
ENSGACG00000016994	gramd2a	GRAM domain containing 2a [Source:ZFIN;Acc:ZDB-GENE-040724-9]	groupII	19305111	19323781	1	-0.0850424	-0.53677	0.0962982	3.33721	11.7493	0.00829327	0.0239032	11
ENSGACG00000003513	RIMS4	regulating synaptic membrane exocytosis 4 [Source:HGNC Symbol;Acc:HGNC:16183]	groupXVII	772640	787599	-1	-0.601078	-0.778862	0.024067	4.12007	11.7323	0.00835871	0.0240878	11
ENSGACG00000003582	tnfsf13b	tumor necrosis factor (ligand) superfamily, member 13b [Source:ZFIN;Acc:ZDB-GENE-080204-44]	groupXVI	8023067	8024372	-1	0.668605	-2.31735	1.51536	0.00971151	11.7278	0.00837637	0.0241373	6
ENSGACG00000002902			groupXIX	2484537	2497605	1	-1.24998	-0.323224	-0.47016	1.31513	11.7269	0.00837979	0.0241458	10
ENSGACG00000003415	dnajc12	DnaJ (Hsp40) homolog, subfamily C, member 12 [Source:ZFIN;Acc:ZDB-GENE-070801-3]	groupVI	2991383	2993839	1	-0.343062	0.104837	0.170032	3.61633	11.7178	0.00841522	0.0242425	10
ENSGACG00000012652	lingo3a	leucine rich repeat and Ig domain containing 3a [Source:ZFIN;Acc:ZDB-GENE-060503-54]	groupVIII	16041766	16043610	1	0.0314337	0.393393	-0.0144486	4.03986	11.7036	0.00847053	0.0244004	10
ENSGACG00000018855			groupVII	1441478	1444706	1	-0.802625	-1.79547	-0.0769702	5.37144	11.6962	0.00849968	0.024483	13
ENSGACG00000000633	esyt1b	extended synaptotagmin-like protein 1b [Source:ZFIN;Acc:ZDB-GENE-040724-209]	scaffold_27	1488529	1504111	-1	-0.306023	-0.198314	0.0877165	5.13502	11.6959	0.00850075	0.0244847	11
ENSGACG00000002454	tmx3	thioredoxin-related transmembrane protein 3 [Source:ZFIN;Acc:ZDB-GENE-050522-396]	scaffold_161	29932	42589	1	0.0648843	-1.20792	0.710454	1.97769	11.6859	0.00854055	0.024598	9
ENSGACG00000016030	pax6b	paired box gene 6b [Source:ZFIN;Acc:ZDB-GENE-001031-1]	groupII	12852672	12865594	1	-0.397638	-1.09141	-0.139136	2.82052	11.6765	0.00857756	0.0247032	13
ENSGACG00000020132			scaffold_84	45192	47422	1	0.0172886	0.315573	0.504297	4.73897	11.6754	0.00858204	0.0247147	10
ENSGACG00000010251	SUCNR1	succinate receptor 1 [Source:HGNC Symbol;Acc:HGNC:4542]	groupI	10382050	10383467	-1	0.243343	-3.99302	3.88482	-1.96961	11.6702	0.0086028	0.0247731	4
ENSGACG00000006709	pou1f1	POU domain, class 1, transcription factor 1 [Source:ZFIN;Acc:ZDB-GENE-040630-7]	groupXVI	13150514	13155698	-1	-2.43007	0.791675	-1.55032	-0.758033	11.6688	0.00860839	0.024785	3
ENSGACG00000016754	grapb	GRB2-related adaptor protein b [Source:ZFIN;Acc:ZDB-GENE-050913-4]	groupIX	5149176	5152194	1	-0.715682	-1.04611	0.15727	0.606293	11.6596	0.00864513	0.0248894	13
ENSGACG00000015326	sema4e	semaphorin 4e [Source:ZFIN;Acc:ZDB-GENE-990715-7]	groupIII	7535753	7541850	-1	-0.409284	-1.09061	0.229388	2.31714	11.6472	0.00869499	0.0250316	11
ENSGACG00000005171			groupXIX	6709031	6714350	1	-0.731759	-1.69323	-0.26686	-0.282372	11.629	0.00876819	0.0252409	13
ENSGACG00000013171	otud7b	OTU domain containing 7B [Source:ZFIN;Acc:ZDB-GENE-060616-1]	groupXX	15718618	15727964	1	-0.447907	0.350572	0.582242	1.93385	11.6222	0.00879599	0.0253181	10
ENSGACG00000002907	sult1st4	sulfotransferase family 1, cytosolic sulfotransferase 4 [Source:ZFIN;Acc:ZDB-GENE-040426-2054]	groupXII	1048504	1051783	-1	-0.0347166	-0.357783	0.6651	3.62724	11.6098	0.00884657	0.0254622	12
ENSGACG00000012600			groupXX	14209796	14211021	-1	-0.0946446	-2.47215	1.23307	-0.251829	11.586	0.00894448	0.0257411	6
ENSGACG00000004107	CLUL1 (1 of 2)	clusterin-like 1 (retinal) [Source:HGNC Symbol;Acc:HGNC:2096]	groupXXI	9489864	9493461	1	0.570517	-1.67373	0.919822	-0.825963	11.5807	0.00896682	0.0258011	9
ENSGACG00000016978	zgc:162144	zgc:162144 [Source:ZFIN;Acc:ZDB-GENE-030131-7630]	groupIV	5306795	5308743	1	-0.126715	-1.8149	0.910212	-0.379772	11.5703	0.00901005	0.0259226	6
ENSGACG00000012215	CACNG1 (1 of 2)	calcium channel, voltage-dependent, gamma subunit 1 [Source:HGNC Symbol;Acc:HGNC:1405]	groupXI	11299220	11306484	1	-0.798659	-1.32891	-0.04302	2.62952	11.5667	0.00902496	0.025964	13
ENSGACG00000008527	im:7148400	im:7148400 [Source:ZFIN;Acc:ZDB-GENE-050309-74]	groupXI	5661792	5665608	1	-0.392839	-0.84942	0.568277	2.11297	11.5413	0.00913155	0.0262677	12
ENSGACG00000018558	FAM46D (1 of 2)	family with sequence similarity 46, member D [Source:HGNC Symbol;Acc:HGNC:28399]	groupIV	15681137	15685074	-1	-0.13105	0.212698	0.33652	4.35726	11.5389	0.00914197	0.0262947	10
ENSGACG00000011698	TP53I3	tumor protein p53 inducible protein 3 [Source:HGNC Symbol;Acc:HGNC:19373]	groupXV	11478567	11482605	1	0.0503825	-1.4676	0.718897	3.5778	11.5159	0.00923942	0.0265721	9
ENSGACG00000008828			groupXX	10257431	10258487	-1	0.136984	-1.50073	1.15111	3.04037	11.5137	0.00924882	0.0265976	9
ENSGACG00000011977	ppdpfa	pancreatic progenitor cell differentiation and proliferation factor a [Source:ZFIN;Acc:ZDB-GENE-030219-204]	groupXII	15736143	15738244	-1	0.336904	-1.22716	1.09598	1.73051	11.5026	0.00929665	0.0267337	9
ENSGACG00000004196	TNNC2 (1 of 2)	troponin C type 2 (fast) [Source:HGNC Symbol;Acc:HGNC:11944]	groupXII	3687732	3690627	1	-1.1864	0.172769	-1.45056	-0.513174	11.5013	0.00930207	0.0267477	3
ENSGACG00000016844	CIB3	calcium and integrin binding family member 3 [Source:HGNC Symbol;Acc:HGNC:24580]	groupIII	12172197	12175808	1	-0.186639	-1.29317	1.54438	-0.15945	11.4967	0.00932219	0.0268026	9
ENSGACG00000018717	add3a	adducin 3 (gamma) a [Source:ZFIN;Acc:ZDB-GENE-030131-2721]	groupIX	14078380	14100035	-1	-0.298832	-0.484269	-0.0537555	5.26694	11.4935	0.00933591	0.0268405	11
ENSGACG00000010244	idh3a	isocitrate dehydrogenase 3 (NAD+) alpha [Source:ZFIN;Acc:ZDB-GENE-040426-1007]	groupXIX	11973704	11978272	1	1.13992	-0.224707	-0.223283	4.99512	11.4877	0.0093607	0.0269103	10
ENSGACG00000000790			scaffold_47	578155	596424	-1	0.126971	-1.84868	1.12041	1.70019	11.4761	0.0094113	0.0270528	9
ENSGACG00000008329	pvalb6	parvalbumin 6 [Source:ZFIN;Acc:ZDB-GENE-040912-95]	groupXI	5145296	5172176	1	-0.450915	-0.742403	-0.151821	6.16209	11.4599	0.00948222	0.0272551	11
ENSGACG00000014881			groupXI	16223914	16226389	-1	-0.0848272	-0.597948	0.993756	1.17185	11.4537	0.00950938	0.0273316	12
ENSGACG00000017305	FYB	FYN binding protein [Source:HGNC Symbol;Acc:HGNC:4036]	groupXIV	7304055	7314207	1	0.0380888	-1.5726	1.09434	4.23743	11.4487	0.00953148	0.0273921	9
ENSGACG00000009825	si:ch211-154o6.6	si:ch211-154o6.6 [Source:ZFIN;Acc:ZDB-GENE-060503-576]	groupXX	11526901	11530777	-1	-0.137668	-1.14589	0.535063	3.88221	11.4288	0.00961938	0.0276385	12
ENSGACG00000015787			scaffold_135	72730	74567	-1	-0.374792	-3.52317	1.18413	1.72438	11.4236	0.0096426	0.0277037	6
ENSGACG00000014325	cep135	centrosomal protein 135 [Source:ZFIN;Acc:ZDB-GENE-041210-325]	groupVIII	18785761	18791670	1	0.0770931	-0.200161	-0.319381	4.68318	11.4196	0.00966028	0.0277529	10
ENSGACG00000015440	hsdl2	hydroxysteroid dehydrogenase like 2 [Source:ZFIN;Acc:ZDB-GENE-030131-1066]	groupXIV	55532	60061	-1	0.240823	0.348046	0.29301	7.22174	11.4185	0.00966537	0.027766	10
ENSGACG00000008349	TNNI2 (4 of 5)	troponin I type 2 (skeletal, fast) [Source:HGNC Symbol;Acc:HGNC:11946]	groupXIX	9323371	9326473	1	-3.34375	-0.71502	-2.07217	-1.79041	11.4078	0.00971316	0.0279001	3
ENSGACG00000019395			groupIX	17101776	17107592	1	-1.27411	2.13821	0.988223	-0.685558	11.3864	0.00980989	0.0281732	8
ENSGACG00000015002	MPP4 (2 of 2)	membrane protein, palmitoylated 4 (MAGUK p55 subfamily member 4) [Source:HGNC Symbol;Acc:HGNC:13680]	scaffold_74	413269	421422	1	-0.109148	-1.41477	0.98819	0.482109	11.3572	0.00994303	0.028554	9
ENSGACG00000019043	pycr1a	pyrroline-5-carboxylate reductase 1a [Source:ZFIN;Acc:ZDB-GENE-040426-1675]	groupIX	15241216	15246931	-1	-0.168343	0.380462	-0.000276329	3.74957	11.3542	0.00995692	0.0285923	10
ENSGACG00000013437	LPIN1 (1 of 2)	lipin 1 [Source:HGNC Symbol;Acc:HGNC:13345]	groupXVIII	15739307	15747826	1	-0.529319	0.06208	-0.331354	3.83821	11.3352	0.0100446	0.0288408	10
ENSGACG00000002357	MYO1G	myosin IG [Source:HGNC Symbol;Acc:HGNC:13880]	groupX	1935507	1963916	-1	0.442539	-1.71352	1.16293	2.13815	11.3346	0.0100474	0.0288473	9
ENSGACG00000006149	CDO1	cysteine dioxygenase type 1 [Source:HGNC Symbol;Acc:HGNC:1795]	groupXIII	4621043	4625012	-1	0.145733	-1.04178	0.701327	4.27612	11.3272	0.010082	0.0289402	12
ENSGACG00000014955			scaffold_74	250410	257776	-1	0.788253	-1.99645	1.51558	0.330898	11.3052	0.0101848	0.0292305	6
ENSGACG00000011602	LAMB3	laminin, beta 3 [Source:HGNC Symbol;Acc:HGNC:6490]	groupXVII	12652011	12662065	-1	1.69901	1.3187	0.227665	-0.0885406	11.2713	0.0103459	0.0296845	8
ENSGACG00000017318	arl13a	ADP-ribosylation factor-like 13A [Source:ZFIN;Acc:ZDB-GENE-040426-1790]	groupIV	6373330	6376956	-1	0.151316	-3.76192	2.00358	-2.27492	11.2657	0.0103724	0.0297589	5
ENSGACG00000009777	erap2	endoplasmic reticulum aminopeptidase 2 [Source:ZFIN;Acc:ZDB-GENE-080402-6]	groupXIII	9555534	9563513	1	0.119782	-0.457349	0.408887	4.17597	11.2647	0.0103773	0.0297711	12
ENSGACG00000004094	gpr37l1a	G protein-coupled receptor 37 like 1a [Source:ZFIN;Acc:ZDB-GENE-110411-20]	groupXVII	1597704	1600808	1	-0.63367	-0.799047	-0.106351	2.35808	11.2624	0.0103885	0.0298016	11
ENSGACG00000001136			scaffold_146	4927	5878	-1	0.657571	0.609743	0.0715793	3.24807	11.2581	0.0104091	0.0298591	10
ENSGACG00000001675			scaffold_120	284160	295979	-1	1.36249	1.77065	-0.169408	1.08122	11.2423	0.0104854	0.0300746	8
ENSGACG00000001585	ITIH4 (2 of 2)	inter-alpha-trypsin inhibitor heavy chain family, member 4 [Source:HGNC Symbol;Acc:HGNC:6169]	scaffold_27	4635811	4639569	-1	0.525018	-1.01743	-0.239805	2.31263	11.2394	0.0104993	0.0301128	7
ENSGACG00000001742			scaffold_232	44159	79908	1	1.19948	-1.49843	-0.101841	2.29814	11.2221	0.0105836	0.030351	7
ENSGACG00000012263	slc38a5a	solute carrier family 38, member 5a [Source:ZFIN;Acc:ZDB-GENE-081105-92]	groupXII	16070839	16077624	-1	-0.0101948	-1.22108	0.501457	0.862763	11.1877	0.0107529	0.0308281	12
ENSGACG00000005410	cyp46a2	cytochrome P450, family 46, subfamily A, polypeptide 2 [Source:ZFIN;Acc:ZDB-GENE-040426-1184]	groupXVIII	2537071	2565520	1	0.0664421	0.034593	0.485306	4.75317	11.1847	0.010768	0.0308695	12
ENSGACG00000002559	hgd	homogentisate 1,2-dioxygenase [Source:ZFIN;Acc:ZDB-GENE-020802-5]	groupXXI	5895782	5903328	-1	0.565213	-0.4861	0.556293	1.71418	11.1788	0.0107973	0.0309519	12
ENSGACG00000009204	PLEKHG1	pleckstrin homology domain containing, family G (with RhoGef domain) member 1 [Source:HGNC Symbol;Acc:HGNC:20884]	groupXVIII	8741976	8757566	-1	-0.516535	-1.02987	-0.120814	4.61124	11.1732	0.0108253	0.0310303	13
ENSGACG00000019072	INTU	inturned planar cell polarity protein [Source:HGNC Symbol;Acc:HGNC:29239]	groupVII	2483542	2494836	-1	0.59781	0.355965	-0.414096	2.98407	11.1598	0.0108925	0.0312179	10
ENSGACG00000018054	serping1	serpin peptidase inhibitor, clade G (C1 inhibitor), member 1 [Source:ZFIN;Acc:ZDB-GENE-030131-1262]	groupIX	9801277	9804719	-1	1.94945	-0.585852	-0.0846675	-0.525757	11.1543	0.01092	0.0312949	7
ENSGACG00000015958	irf8	interferon regulatory factor 8 [Source:ZFIN;Acc:ZDB-GENE-040718-367]	groupII	12097880	12101467	-1	0.0244083	-1.81931	1.21866	3.67194	11.1473	0.0109553	0.0313943	9
ENSGACG00000018809	cyp26b1	cytochrome P450, family 26, subfamily b, polypeptide 1 [Source:ZFIN;Acc:ZDB-GENE-030131-2908]	groupVII	1211620	1221420	1	-0.308568	-0.606991	-0.258886	3.03263	11.1325	0.0110304	0.0316076	11
ENSGACG00000001534	adhfe1	alcohol dehydrogenase, iron containing, 1 [Source:ZFIN;Acc:ZDB-GENE-040426-2070]	scaffold_120	95125	103663	1	0.384264	0.518337	0.266503	4.37447	11.1258	0.0110645	0.0317037	10
ENSGACG00000018832	zgc:136908	zgc:136908 [Source:ZFIN;Acc:ZDB-GENE-060312-22]	groupIX	14579270	14584731	-1	0.157782	-0.714469	-0.123308	1.69286	11.1007	0.0111936	0.0320664	11
ENSGACG00000019690	cacna2d4a	calcium channel, voltage-dependent, alpha 2/delta subunit 4a [Source:ZFIN;Acc:ZDB-GENE-041210-213]	groupIV	28762101	28821369	-1	-1.02038	-1.42218	-0.068914	3.72069	11.0794	0.0113042	0.0323795	13
ENSGACG00000017982	aldob	aldolase b, fructose-bisphosphate [Source:ZFIN;Acc:ZDB-GENE-030131-383]	groupIV	10687390	10690122	1	0.410517	-0.616476	-0.372775	3.11609	11.0623	0.0113937	0.0326306	11
ENSGACG00000017967			groupIII	16679542	16682223	1	0.505532	-1.54558	1.00888	1.26385	11.0584	0.011414	0.0326868	9
ENSGACG00000004815			groupXV	957609	958739	-1	1.44445	0.191202	-0.396044	2.52497	11.0565	0.0114242	0.0327144	10
ENSGACG00000004909	TMEM8B (1 of 2)	transmembrane protein 8B [Source:HGNC Symbol;Acc:HGNC:21427]	groupXIII	2375287	2400699	1	-0.46784	0.328557	0.142995	4.79927	11.0434	0.0114933	0.0329066	10
ENSGACG00000006316			groupI	3056578	3059895	-1	0.205827	-2.18492	1.72947	-1.50791	11.02	0.0116185	0.0332613	6
ENSGACG00000016824	fat2	FAT tumor suppressor homolog 2 (Drosophila) [Source:ZFIN;Acc:ZDB-GENE-111031-1]	groupIV	4393867	4436529	1	-0.472567	-1.37597	-0.0564969	6.17556	11.0195	0.0116209	0.0332665	13
ENSGACG00000002232	LCT (1 of 2)	lactase [Source:HGNC Symbol;Acc:HGNC:6530]	groupXVI	4650140	4660569	1	1.40854	-0.616437	0.654022	1.85806	11.0132	0.0116547	0.0333574	12
ENSGACG00000006817			groupXVII	5590813	5591577	1	-0.481744	-1.16095	-0.428535	2.24723	11.0091	0.0116767	0.0334188	13
ENSGACG00000018504	PRF1 (5 of 5)	perforin 1 (pore forming protein) [Source:HGNC Symbol;Acc:HGNC:9360]	groupIX	12707606	12709413	-1	0.98842	-0.728965	0.551131	0.957325	11.0005	0.0117232	0.033546	12
ENSGACG00000016401	acbd5b	acyl-Coenzyme A binding domain containing 5b [Source:ZFIN;Acc:ZDB-GENE-070705-18]	groupIII	10323045	10328857	-1	-0.188345	-0.290165	-0.039163	4.65289	10.9893	0.0117837	0.0337174	11
ENSGACG00000018796	cmasb	cytidine monophosphate N-acetylneuraminic acid synthetase b [Source:ZFIN;Acc:ZDB-GENE-120427-1]	groupVII	1130001	1132898	1	-0.212317	0.0841343	0.410225	3.90966	10.967	0.0119057	0.0340627	10
ENSGACG00000005040	me1	malic enzyme 1, NADP(+)-dependent, cytosolic [Source:ZFIN;Acc:ZDB-GENE-061013-438]	groupXX	3358064	3409590	-1	-0.0583869	-1.0293	0.514971	0.780647	10.9643	0.0119207	0.0341037	12
ENSGACG00000003678	zic1	zic family member 1 (odd-paired homolog, Drosophila) [Source:ZFIN;Acc:ZDB-GENE-000208-4]	groupXXI	8365368	8367504	-1	-0.516147	-1.01603	-0.155997	6.73286	10.9439	0.0120331	0.0344194	13
ENSGACG00000009455	pvalb9	parvalbumin 9 [Source:ZFIN;Acc:ZDB-GENE-030805-4]	groupV	11308451	11309548	1	-1.01261	-0.453546	1.70825	0.340054	10.9286	0.0121182	0.0346591	9
ENSGACG00000010301			groupXI	8127608	8129632	-1	0.884039	-1.77191	1.33248	-1.40801	10.9287	0.0121178	0.0346591	6
ENSGACG00000015528			groupIII	8423158	8424352	-1	0.39693	-2.21124	1.49976	-0.281649	10.9124	0.0122091	0.034917	6
ENSGACG00000004307	hcn3	hyperpolarization activated cyclic nucleotide-gated potassium channel 3 [Source:ZFIN;Acc:ZDB-GENE-060503-193]	groupX	6676041	6678139	-1	-0.0154131	-2.63147	1.90581	-1.9774	10.9046	0.0122531	0.0350408	6
ENSGACG00000009963	ebi3	Epstein-Barr virus induced gene 3 [Source:ZFIN;Acc:ZDB-GENE-070912-615]	groupXV	8204513	8206803	1	0.391453	-2.4151	0.555756	-0.299457	10.8992	0.0122834	0.0351256	6
ENSGACG00000018426	cabp2a	calcium binding protein 2a [Source:ZFIN;Acc:ZDB-GENE-050913-25]	groupIX	12181360	12185638	1	-0.315043	-2.37454	1.51781	-1.74045	10.8906	0.0123327	0.0352625	6
ENSGACG00000010817	tdh	L-threonine dehydrogenase [Source:ZFIN;Acc:ZDB-GENE-040426-2379]	groupXVIII	10851941	10855974	-1	0.287839	-0.304354	0.673458	3.7532	10.8667	0.0124691	0.0356488	12
ENSGACG00000000718	ankrd33ab	ankyrin repeat domain 33Ab [Source:ZFIN;Acc:ZDB-GENE-100729-1]	scaffold_27	1981960	1984044	1	-0.724506	-3.94341	3.54393	-2.225	10.865	0.012479	0.035675	4
ENSGACG00000002297	cdh1	cadherin 1, epithelial [Source:ZFIN;Acc:ZDB-GENE-010606-1]	groupVI	341078	386283	-1	0.52979	-1.61276	1.19726	1.9682	10.8588	0.0125145	0.0357727	9
ENSGACG00000006769	AAED1	AhpC/TSA antioxidant enzyme domain containing 1 [Source:HGNC Symbol;Acc:HGNC:16881]	groupXIII	5194441	5196142	-1	-0.462094	-0.291471	0.228205	2.45142	10.8571	0.0125243	0.0357985	11
ENSGACG00000019899	srd5a2b	steroid-5-alpha-reductase, alpha polypeptide 2b [Source:ZFIN;Acc:ZDB-GENE-050417-182]	groupIX	19958905	19962337	-1	-0.52735	-0.14605	-0.334964	3.1191	10.8333	0.0126621	0.0361823	10
ENSGACG00000000256	si:dkey-4c23.5	si:dkey-4c23.5 [Source:ZFIN;Acc:ZDB-GENE-050208-349]	scaffold_584	2809	4887	1	0.31049	-1.95097	0.850774	-0.913011	10.8327	0.0126658	0.0361896	6
ENSGACG00000004198	tnnc2	troponin C type 2 (fast) [Source:ZFIN;Acc:ZDB-GENE-000322-2]	groupXII	3692240	3694594	1	-2.39493	-1.17744	-1.36721	-0.427404	10.8309	0.0126763	0.0362169	3
ENSGACG00000018866			groupVII	1446415	1448832	-1	-0.266124	-1.45127	0.688961	0.817195	10.8198	0.0127411	0.0364001	9
ENSGACG00000015091	rs1a	retinoschisin 1a [Source:ZFIN;Acc:ZDB-GENE-040801-171]	groupII	5957410	5961898	1	-0.437208	-2.21383	0.957013	-0.476434	10.8074	0.0128145	0.0366056	9
ENSGACG00000004467	ampd1	adenosine monophosphate deaminase 1 (isoform M) [Source:ZFIN;Acc:ZDB-GENE-040426-1906]	groupXII	4053402	4064368	-1	-1.49674	-0.559049	-1.65783	-1.32996	10.8054	0.0128258	0.0366359	3
ENSGACG00000017581	cngb1a	cyclic nucleotide gated channel beta 1a [Source:ZFIN;Acc:ZDB-GENE-050419-164]	groupII	22689793	22705772	-1	0.145741	-0.257759	3.19093	1.89366	10.7886	0.0129258	0.0369153	5
ENSGACG00000011228			groupVIII	14298043	14301088	-1	0.175355	-2.84166	1.22702	-1.76843	10.7804	0.0129746	0.0370505	6
ENSGACG00000002865	PRICKLE2 (1 of 2)	prickle homolog 2 (Drosophila) [Source:HGNC Symbol;Acc:HGNC:20340]	groupXII	847025	855389	1	0.147857	0.258237	0.0895223	5.88534	10.7793	0.0129809	0.0370665	10
ENSGACG00000017588			groupII	22706044	22707298	-1	0.520716	0.431089	3.53479	-0.405271	10.7709	0.0130312	0.037208	5
ENSGACG00000006694	plaua	plasminogen activator, urokinase a [Source:ZFIN;Acc:ZDB-GENE-090313-278]	groupVI	7982340	7984539	-1	-0.109737	-1.61331	1.13908	0.641373	10.7635	0.0130757	0.037331	9
ENSGACG00000018388	si:dkeyp-35f12.3	si:dkeyp-35f12.3 [Source:ZFIN;Acc:ZDB-GENE-090313-385]	groupXIV	14177820	14184673	-1	0.0991532	-1.59061	0.897381	0.182004	10.7527	0.0131413	0.0375141	9
ENSGACG00000006675			groupI	4051080	4054603	-1	-0.0565155	-1.62451	0.781353	0.186747	10.7056	0.0134294	0.0383302	9
ENSGACG00000003502	C10orf54	chromosome 10 open reading frame 54 [Source:HGNC Symbol;Acc:HGNC:30085]	groupVI	3408391	3415881	-1	-0.0247489	-1.254	0.817505	2.46678	10.6996	0.0134663	0.0384333	9
ENSGACG00000019665			groupIX	18708797	18714576	1	-0.489311	-0.511004	-0.0389714	1.50263	10.6967	0.0134845	0.0384809	11
ENSGACG00000001632	samhd1 (2 of 3)	SAM domain and HD domain 1 [Source:ZFIN;Acc:ZDB-GENE-090313-386]	scaffold_180	90678	100224	-1	-0.0611896	-0.603206	0.0072502	3.50447	10.6867	0.0135466	0.0386539	11
ENSGACG00000006330	PLD4	phospholipase D family, member 4 [Source:HGNC Symbol;Acc:HGNC:23792]	groupXV	2737161	2739834	1	0.125559	-1.66556	0.975179	1.93088	10.6834	0.0135672	0.0387104	9
ENSGACG00000001767	TRIM14 (35 of 76)	tripartite motif containing 14 [Source:HGNC Symbol;Acc:HGNC:16283]	scaffold_310	11953	12480	1	-0.158087	-1.51366	0.606105	-0.0816378	10.6784	0.0135985	0.0387976	9
ENSGACG00000008250			groupX	12683622	12684212	-1	3.92846	-1.03742	2.06369	2.09202	10.665	0.0136821	0.039034	7
ENSGACG00000015987	syt9a	synaptotagmin IXa [Source:ZFIN;Acc:ZDB-GENE-031002-18]	groupII	12593892	12606851	-1	0.239266	0.256477	0.0211871	5.1657	10.6565	0.0137357	0.0391827	10
ENSGACG00000002887	qars	glutaminyl-tRNA synthetase [Source:ZFIN;Acc:ZDB-GENE-040426-1011]	groupXII	875642	881378	-1	-0.140991	-0.311669	0.364793	4.35118	10.6391	0.0138462	0.0394934	12
ENSGACG00000017483	btk	Bruton agammaglobulinemia tyrosine kinase [Source:ZFIN;Acc:ZDB-GENE-070531-1]	groupIV	7482711	7490355	1	0.131221	-1.56465	1.03379	1.74198	10.634	0.0138787	0.0395839	9
ENSGACG00000009594	ppm1na	protein phosphatase, Mg2+/Mn2+ dependent, 1Na (putative) [Source:ZFIN;Acc:ZDB-GENE-040426-2731]	groupI	9359890	9363928	1	0.0382733	-1.96953	0.629871	-0.618211	10.616	0.0139943	0.0399093	6
ENSGACG00000016479	zgc:63568	zgc:63568 [Source:ZFIN;Acc:ZDB-GENE-040426-1165]	groupIV	1795282	1798778	1	0.00597926	-0.74963	1.25123	1.68859	10.6006	0.0140935	0.0401875	12
ENSGACG00000019369	PIK3R6 (2 of 3)	phosphoinositide-3-kinase, regulatory subunit 6 [Source:HGNC Symbol;Acc:HGNC:27101]	groupIX	16817187	16820255	-1	0.399176	-1.26301	0.218057	1.106	10.5986	0.014107	0.0402239	7
ENSGACG00000011569	TRPM6	transient receptor potential cation channel, subfamily M, member 6 [Source:HGNC Symbol;Acc:HGNC:17995]	groupXIII	13116394	13129794	-1	0.21715	0.367792	-0.477133	3.71587	10.5983	0.0141086	0.0402263	10
ENSGACG00000013472	mybpc2a	myosin binding protein C, fast type a [Source:ZFIN;Acc:ZDB-GENE-060901-1]	groupXI	13059902	13087747	1	-0.0250966	-0.932658	-0.14277	0.973997	10.5896	0.0141652	0.0403852	11
ENSGACG00000017972	tcirg1	T-cell, immune regulator 1, ATPase, H+ transporting, lysosomal V0 subunit A3 [Source:ZFIN;Acc:ZDB-GENE-090311-31]	groupIV	10641984	10650309	-1	0.0961764	-0.975575	0.761295	4.98916	10.5739	0.0142676	0.0406704	12
ENSGACG00000009409	pvalb4	parvalbumin 4 [Source:ZFIN;Acc:ZDB-GENE-040625-48]	groupV	11304063	11306049	1	-2.046	-1.59294	-0.156698	0.133911	10.5705	0.0142905	0.0407311	13
ENSGACG00000008536	MLKL	mixed lineage kinase domain-like [Source:HGNC Symbol;Acc:HGNC:26617]	groupXIX	9509896	9515977	-1	-0.917828	-0.584528	0.649358	0.805561	10.5609	0.0143536	0.0409021	9
ENSGACG00000020605	HEPHL1	hephaestin-like 1 [Source:HGNC Symbol;Acc:HGNC:30477]	groupVII	21319485	21328831	1	-0.214956	-0.714949	0.181524	4.52612	10.5457	0.0144542	0.0411817	11
ENSGACG00000001996			scaffold_128	163363	177686	1	-0.536551	1.59213	0.33467	1.40525	10.5406	0.0144882	0.041272	8
ENSGACG00000012178	pvalb8	parvalbumin 8 [Source:ZFIN;Acc:ZDB-GENE-030805-3]	groupXI	11257429	11258830	1	0.903582	-2.51498	2.89823	0.768533	10.5362	0.0145174	0.0413481	5
ENSGACG00000012977	tango2	transport and golgi organization 2 homolog (Drosophila) [Source:ZFIN;Acc:ZDB-GENE-040808-42]	groupXIII	15450020	15462773	-1	0.0292713	-0.524555	-0.223095	3.56901	10.5275	0.0145752	0.0415037	11
ENSGACG00000005172	anxa13	annexin A13 [Source:ZFIN;Acc:ZDB-GENE-010406-1]	groupXXI	11058258	11061418	-1	-0.197608	0.223926	-0.238501	6.90096	10.5273	0.014577	0.0415062	10
ENSGACG00000002464	lrit1b	leucine-rich repeat, immunoglobulin-like and transmembrane domains 1b [Source:ZFIN;Acc:ZDB-GENE-060616-45]	groupV	1036289	1039034	-1	0.143591	-2.09811	1.2045	-0.769424	10.5244	0.0145962	0.0415589	6
ENSGACG00000014988	inpp4ab	inositol polyphosphate-4-phosphatase, type Ib [Source:ZFIN;Acc:ZDB-GENE-081104-521]	scaffold_74	375766	388161	1	-0.375376	-0.275774	0.0156622	5.77469	10.5061	0.0147197	0.0419033	11
ENSGACG00000001306	psmb10 (6 of 6)	proteasome (prosome, macropain) subunit, beta type, 10 [Source:ZFIN;Acc:ZDB-GENE-001208-2]	scaffold_452	15685	18236	-1	-0.21154	-1.86186	2.60646	-1.65853	10.5039	0.0147343	0.0419426	5
ENSGACG00000001392	synpr	synaptoporin [Source:ZFIN;Acc:ZDB-GENE-030616-625]	scaffold_27	4139907	4142849	1	-0.00882127	1.59965	-0.0548481	1.10867	10.4902	0.0148274	0.0422031	8
ENSGACG00000000085	rpa3	replication protein A3 [Source:ZFIN;Acc:ZDB-GENE-040426-977]	scaffold_58	498185	499671	1	0.527877	-0.338499	-0.23741	4.65498	10.4825	0.0148801	0.0423482	10
ENSGACG00000018783	NXNL1 (1 of 2)	nucleoredoxin-like 1 [Source:HGNC Symbol;Acc:HGNC:25179]	groupIX	14469994	14472968	1	0.295495	-2.58582	1.19485	-1.6872	10.4777	0.0149128	0.0424391	6
ENSGACG00000014086	cbln12	cerebellin 12 [Source:ZFIN;Acc:ZDB-GENE-070912-11]	groupIII	2853612	2856399	1	-0.578742	-1.58722	-0.119449	6.52955	10.476	0.0149246	0.0424703	13
ENSGACG00000014216	farp1	FERM, RhoGEF (ARHGEF) and pleckstrin domain protein 1 (chondrocyte-derived) [Source:ZFIN;Acc:ZDB-GENE-070424-163]	groupI	21155272	21181371	1	-0.229602	-0.280484	0.0739287	5.22811	10.4723	0.0149497	0.0425391	11
ENSGACG00000001663	twf2b	twinfilin, actin-binding protein, homolog 2b (Drosophila) [Source:ZFIN;Acc:ZDB-GENE-050522-238]	scaffold_27	4834374	4837625	1	-0.227641	-2.05771	2.7639	-2.21353	10.4598	0.0150359	0.0427801	5
ENSGACG00000002000	abca4a	ATP-binding cassette, sub-family A (ABC1), member 4a [Source:ZFIN;Acc:ZDB-GENE-050517-3]	groupXXI	2180740	2208802	1	-0.141691	-1.42752	0.667342	2.28911	10.4453	0.0151367	0.0430595	9
ENSGACG00000006606	zgc:112484	zgc:112484 [Source:ZFIN;Acc:ZDB-GENE-050417-155]	groupXI	3172985	3193999	1	0.00359926	-0.035818	-0.349349	4.13381	10.4222	0.015298	0.0435134	10
ENSGACG00000002011	si:ch211-218d20.15	si:ch211-218d20.15 [Source:ZFIN;Acc:ZDB-GENE-070912-193]	groupXVI	3416058	3419330	-1	0.359657	-0.0580514	-0.177511	4.33679	10.4158	0.0153432	0.0436396	10
ENSGACG00000008321	tnni2a.2	troponin I, skeletal, fast 2a, tandem duplicate 2 [Source:ZFIN;Acc:ZDB-GENE-040426-970]	groupXIX	9291925	9297476	1	-3.34849	-0.720862	-2.23398	-1.38834	10.3963	0.0154811	0.0440245	3
ENSGACG00000012167	lgmn	legumain [Source:ZFIN;Acc:ZDB-GENE-021030-1]	groupXV	12139892	12145795	1	0.0365723	-0.31318	0.239045	5.86753	10.3959	0.015484	0.0440303	12
ENSGACG00000013057	tbx1	T-box 1 [Source:ZFIN;Acc:ZDB-GENE-030805-5]	groupXIII	15665789	15672536	-1	0.591147	-0.754902	1.48785	-1.15351	10.3852	0.0155603	0.0442425	12
ENSGACG00000013470	CTSS (2 of 2)	cathepsin S [Source:HGNC Symbol;Acc:HGNC:2545]	groupXX	16251960	16257880	1	0.088696	-1.66983	0.96434	5.11548	10.3844	0.0155662	0.0442566	9
ENSGACG00000012432	mag	myelin associated glycoprotein [Source:ZFIN;Acc:ZDB-GENE-041217-24]	groupXX	13657980	13668172	1	-0.132439	-0.20851	-0.325701	6.65215	10.3734	0.0156451	0.0444786	10
ENSGACG00000019428			groupVII	4568992	4570830	-1	0.0890045	-1.24054	1.10857	-0.495348	10.3721	0.0156542	0.0445019	9
ENSGACG00000006047	cad	carbamoyl-phosphate synthetase 2, aspartate transcarbamylase, and dihydroorotase [Source:ZFIN;Acc:ZDB-GENE-021030-4]	groupXVIII	3262716	3282550	1	0.311036	0.108838	0.398165	4.62442	10.3615	0.0157304	0.044716	12
ENSGACG00000007843	ptprc	protein tyrosine phosphatase, receptor type, C [Source:ZFIN;Acc:ZDB-GENE-050208-585]	groupVIII	8853903	8869102	-1	0.144442	-1.58698	0.978617	4.93073	10.3563	0.0157679	0.0448203	9
ENSGACG00000008657			groupXII	10784180	10785603	1	0.24648	-1.47465	1.31869	1.32692	10.353	0.0157921	0.0448866	9
ENSGACG00000001941			groupX	891779	894040	1	0.142788	-1.46885	0.796536	0.83429	10.3519	0.0158003	0.0449073	9
ENSGACG00000000547			scaffold_229	28615	29289	1	-0.764135	4.25403	2.35907	-0.271461	10.3483	0.0158259	0.0449752	8
ENSGACG00000020872			groupVII	27162489	27167621	1	2.8173	-1.09944	-0.984863	1.0765	10.3419	0.0158728	0.045106	7
ENSGACG00000002005	si:dkey-14o18.2	si:dkey-14o18.2 [Source:ZFIN;Acc:ZDB-GENE-060503-145]	scaffold_149	79926	85217	-1	0.334784	-2.19803	1.31689	-0.993863	10.3306	0.0159555	0.0453335	6
ENSGACG00000005436	EPS8L2 (1 of 3)	EPS8-like 2 [Source:HGNC Symbol;Acc:HGNC:21296]	groupXIX	6921327	6924109	1	-0.299256	-0.837863	0.00979	2.33874	10.3286	0.0159696	0.0453685	11
ENSGACG00000004509	lactbl1b	lactamase, beta-like 1b [Source:ZFIN;Acc:ZDB-GENE-061207-53]	groupXVII	2408258	2416301	1	0.427665	-1.70119	1.01301	-0.285637	10.3153	0.0160677	0.045642	9
ENSGACG00000000147	psmb9a (5 of 5)	proteasome (prosome, macropain) subunit, beta type, 9a [Source:ZFIN;Acc:ZDB-GENE-990415-140]	scaffold_58	1063341	1065352	-1	-0.840209	-1.41808	1.97847	-0.935758	10.3095	0.0161108	0.0457618	9
ENSGACG00000007641			groupVIII	8608236	8612174	-1	0.108965	-1.45943	1.18121	2.05057	10.3027	0.0161609	0.0459017	9
ENSGACG00000002933			groupXIX	2501529	2511962	1	-1.12617	-0.055404	-0.537375	1.89158	10.2938	0.0162272	0.0460874	10
ENSGACG00000006984	ndrg1b	N-myc downstream regulated gene 1b [Source:ZFIN;Acc:ZDB-GENE-040426-1648]	groupXX	7813416	7816606	1	-0.0409335	-1.22982	0.341649	3.91763	10.2899	0.016256	0.046166	12
ENSGACG00000000129	psmb9a (2 of 5)	proteasome (prosome, macropain) subunit, beta type, 9a [Source:ZFIN;Acc:ZDB-GENE-990415-140]	scaffold_58	930596	932523	-1	-0.342353	-1.98259	1.95177	-1.7595	10.2828	0.0163089	0.0463118	9
ENSGACG00000004669			groupXV	771509	780654	1	0.269757	-0.466243	-0.224515	3.71164	10.2813	0.0163206	0.0463424	11
ENSGACG00000004132			groupVI	4583806	4584971	-1	-0.977605	-2.56998	-0.0201316	0.605938	10.2605	0.0164768	0.0467783	13
ENSGACG00000012020	si:dkey-70p6.1 (2 of 2)	si:dkey-70p6.1 [Source:ZFIN;Acc:ZDB-GENE-040724-140]	groupXII	15782012	15783536	1	0.259245	0.263708	-0.0654773	4.26958	10.2569	0.016504	0.046853	10
ENSGACG00000018472			groupIX	12320854	12327711	-1	-0.259661	-2.14603	0.78389	0.186541	10.2488	0.0165652	0.0470215	9
ENSGACG00000017217			groupXIV	6973575	6976777	1	-0.295347	-0.118604	-0.423136	9.47868	10.241	0.0166251	0.0471838	10
ENSGACG00000018121	grin1a	glutamate receptor, ionotropic, N-methyl D-aspartate 1a [Source:ZFIN;Acc:ZDB-GENE-051202-1]	groupXIV	11304434	11333562	-1	0.0291398	0.194856	-0.0673067	9.7105	10.2256	0.0167428	0.0475151	10
ENSGACG00000014281			groupII	2419524	2426190	1	0.349667	-1.56032	1.11267	2.08155	10.218	0.0168011	0.0476751	9
ENSGACG00000004750			groupVI	5865442	5867472	-1	0.102751	-1.25975	1.10389	4.81328	10.2176	0.016804	0.0476808	9
ENSGACG00000017136	tmem154	transmembrane protein 154 [Source:ZFIN;Acc:ZDB-GENE-030131-2401]	groupIX	6121866	6126808	1	0.320232	-1.51212	1.18705	1.86261	10.2163	0.016814	0.0477065	9
ENSGACG00000002247	SLC9A1 (1 of 2)	solute carrier family 9, subfamily A (NHE1, cation proton antiporter 1), member 1 [Source:HGNC Symbol;Acc:HGNC:11071]	groupX	1598669	1606704	-1	0.157475	0.0946279	-0.231406	4.40409	10.2001	0.0169397	0.0480554	10
ENSGACG00000018002			groupIV	10867467	10891677	1	0.0762069	-1.30951	-0.0690204	0.998088	10.1926	0.0169977	0.0482117	7
ENSGACG00000000314	cnga1	cyclic nucleotide gated channel alpha 1 [Source:ZFIN;Acc:ZDB-GENE-110408-39]	scaffold_131	15870	20132	-1	-0.264584	-1.63064	1.34564	0.912487	10.1922	0.0170008	0.0482179	9
ENSGACG00000002498	commd3	COMM domain containing 3 [Source:ZFIN;Acc:ZDB-GENE-041219-3]	groupXXI	5627431	5630858	-1	0.121686	-0.181554	0.23418	4.27306	10.1914	0.017007	0.0482328	12
ENSGACG00000017039	prom1b	prominin 1 b [Source:ZFIN;Acc:ZDB-GENE-031003-1]	groupIX	6017779	6033654	1	-0.0124094	-1.53945	0.822158	1.66629	10.1733	0.0171494	0.0486285	9
ENSGACG00000009160	phospho1	phosphatase, orphan 1 [Source:ZFIN;Acc:ZDB-GENE-040801-198]	groupXI	6371650	6372487	1	0.242071	0.397345	0.18121	3.68275	10.17	0.0171752	0.0486991	10
ENSGACG00000002395	ankrd33ba	ankyrin repeat domain 33ba [Source:ZFIN;Acc:ZDB-GENE-040724-39]	groupXXI	4591348	4602711	-1	-0.0677786	-1.66403	0.53259	-0.00331772	10.1694	0.0171794	0.0487084	9
ENSGACG00000007569	hsc70	heat shock cognate 70 [Source:ZFIN;Acc:ZDB-GENE-040426-1221]	groupXX	8895263	8899797	1	-2.97706	-1.28603	-2.02446	-1.61832	10.1687	0.0171856	0.0487231	3
ENSGACG00000013555	coro1a	coronin, actin binding protein, 1A [Source:ZFIN;Acc:ZDB-GENE-030131-9512]	groupXI	13284111	13289431	-1	0.099709	-1.19239	1.08914	4.22765	10.1633	0.017228	0.0488354	9
ENSGACG00000000330			scaffold_131	52153	54217	1	0.0961645	-1.38198	1.24867	3.70901	10.1613	0.0172434	0.0488762	9
ENSGACG00000007889	mpp4a	membrane protein, palmitoylated 4a (MAGUK p55 subfamily member 4) [Source:ZFIN;Acc:ZDB-GENE-070912-523]	groupXVI	15735794	15745166	1	0.696603	-2.42734	1.87552	-1.56968	10.1568	0.0172791	0.0489695	6
ENSGACG00000000544	pmela	premelanosome protein a [Source:ZFIN;Acc:ZDB-GENE-030131-9818]	scaffold_27	1133558	1140623	1	0.05402	-1.57713	0.589118	1.0829	10.1563	0.0172829	0.0489775	9
ENSGACG00000006942	gpnmb	glycoprotein (transmembrane) nmb [Source:ZFIN;Acc:ZDB-GENE-060503-106]	groupX	9572022	9576776	-1	1.78494	-1.10679	-0.27223	1.12073	10.1501	0.0173326	0.0491128	7
ENSGACG00000013863	si:ch211-175f12.2	si:ch211-175f12.2 [Source:ZFIN;Acc:ZDB-GENE-110411-220]	groupXX	17706245	17708332	-1	-0.0735228	-2.37403	1.17974	-1.64685	10.1469	0.0173578	0.0491815	6
ENSGACG00000004135			groupVI	4584981	4586183	-1	-1.04255	-3.1352	0.107123	-0.0615523	10.1442	0.0173791	0.0492339	13
ENSGACG00000009734	CUZD1	CUB and zona pellucida-like domains 1 [Source:HGNC Symbol;Acc:HGNC:17937]	groupVI	11873578	11875041	-1	0.943999	-0.887457	-0.997069	1.64513	10.1439	0.0173813	0.0492362	7
ENSGACG00000006459	ccr8.1	chemokine (C-C motif) receptor 8.1 [Source:ZFIN;Acc:ZDB-GENE-070302-1]	groupXX	6343841	6345841	1	1.07703	-1.94835	1.65914	-1.10552	10.1413	0.0174025	0.0492893	6
ENSGACG00000011655	scml4	sex comb on midleg-like 4 (Drosophila) [Source:ZFIN;Acc:ZDB-GENE-041210-338]	groupXV	11423644	11426835	1	0.0440293	0.230219	-0.353939	4.94427	10.1394	0.0174173	0.0493257	10
ENSGACG00000008301			groupXVI	16368349	16369778	-1	-1.26721	-1.2608	0.903837	-0.769768	10.1322	0.0174755	0.049485	9
ENSGACG00000000391			scaffold_341	1271	2388	1	0.208215	5.82819	-1.37191	-0.963439	10.1256	0.0175284	0.0496321	8
ENSGACG00000014494	slc12a7a	solute carrier family 12, member 7a [Source:ZFIN;Acc:ZDB-GENE-070912-696]	groupIII	4902925	4919919	-1	-0.271425	0.175412	-0.6106	1.87469	10.1252	0.0175313	0.0496375	10
ENSGACG00000001528			scaffold_27	4411504	4430437	1	0.261779	-2.31963	-1.22512	-0.358931	10.1181	0.0175887	0.0497974	13
ENSGACG00000010905			groupXVIII	10940768	10947132	1	0.126603	-1.72081	1.15664	2.7809	10.1131	0.0176289	0.0499057	9
ENSGACG00000003192	bai1b	brain-specific angiogenesis inhibitor 1b [Source:ZFIN;Acc:ZDB-GENE-081031-45]	groupX	4364784	4380750	1	0.0543179	0.250423	0.161927	6.54327	10.1126	0.0176331	0.0499149	10
ENSGACG00000020434	il2rgb	interleukin 2 receptor, gamma b [Source:ZFIN;Acc:ZDB-GENE-080402-2]	groupVII	18548109	18551764	1	0.0464344	-2.0189	0.631907	2.74446	10.1088	0.0176632	0.0499973	6
ENSGACG00000017782	rhbg	Rhesus blood group, B glycoprotein [Source:ZFIN;Acc:ZDB-GENE-030131-9542]	scaffold_137	240288	248932	1	-0.1242	-1.6039	1.1861	-1.06927	10.1012	0.0177249	0.0501665	9
ENSGACG00000008090	NAPSA	napsin A aspartic peptidase [Source:HGNC Symbol;Acc:HGNC:13395]	groupXI	5068126	5071647	-1	-0.280188	-0.652807	0.277883	4.10941	10.0995	0.0177387	0.0501999	11
ENSGACG00000016915	ccdc88b	coiled-coil domain containing 88B [Source:ZFIN;Acc:ZDB-GENE-080303-31]	groupIV	5045251	5062999	1	0.075429	-1.36675	0.626001	0.409089	10.0912	0.0178064	0.0503832	9
ENSGACG00000003902	lingo4a	leucine rich repeat and Ig domain containing 4a [Source:ZFIN;Acc:ZDB-GENE-060503-275]	groupX	5313483	5315330	1	-0.416898	-1.5047	-0.0642038	4.06365	10.0872	0.0178389	0.0504694	13
ENSGACG00000000155	C3 (1 of 8)	complement component 3 [Source:HGNC Symbol;Acc:HGNC:1318]	scaffold_251	15265	34678	1	1.10315	-1.45986	-0.105375	2.79296	10.0762	0.0179296	0.0507233	7
ENSGACG00000005743			groupV	7639898	7640978	1	-0.223144	-1.97664	1.85192	-1.93575	10.0722	0.0179624	0.0508133	9
ENSGACG00000019365	shbg	sex hormone binding globulin [Source:ZFIN;Acc:ZDB-GENE-030131-1324]	groupVII	4261545	4265559	-1	-0.89861	-0.101887	0.781517	1.14702	10.0053	0.0185214	0.0523801	9
ENSGACG00000009164	LYAR	Ly1 antibody reactive [Source:HGNC Symbol;Acc:HGNC:26021]	groupXVII	8775427	8778420	-1	-0.751581	-0.267002	0.285167	2.8524	10.0025	0.0185453	0.052442	10
ENSGACG00000010941	ZACN	zinc activated ligand-gated ion channel [Source:HGNC Symbol;Acc:HGNC:29504]	groupXI	8866306	8895216	1	-2.90869	0.484219	1.58139	-0.129931	10.0011	0.0185564	0.0524706	3
ENSGACG00000005469	pitpnaa	phosphatidylinositol transfer protein, alpha a [Source:ZFIN;Acc:ZDB-GENE-040426-744]	groupI	1385915	1393786	1	-0.0749871	-0.719746	0.400383	2.0221	9.97156	0.0188095	0.0531772	12
ENSGACG00000014950			groupI	23448762	23450982	-1	0.183789	-1.84968	0.524254	-0.204955	9.96806	0.0188396	0.0532595	6
ENSGACG00000008645	arhgap4a	Rho GTPase activating protein 4a [Source:ZFIN;Acc:ZDB-GENE-040426-1229]	groupXII	10780057	10783969	1	0.322258	-1.55385	1.19099	2.08317	9.94118	0.0190728	0.0539069	9
ENSGACG00000000193			scaffold_198	54786	56486	1	0.673651	-1.7011	1.32839	-0.763482	9.94037	0.0190799	0.053924	6
ENSGACG00000018779	col4a6	collagen, type IV, alpha 6 [Source:ZFIN;Acc:ZDB-GENE-101001-2]	groupVII	1036400	1060359	1	-0.01232	-0.0413857	-0.419793	3.38342	9.93781	0.0191022	0.0539842	10
ENSGACG00000011714	ADCK3 (1 of 2)	aarF domain containing kinase 3 [Source:HGNC Symbol;Acc:HGNC:16812]	groupXV	11493917	11501523	-1	0.541258	-0.0561329	1.48812	2.89176	9.92629	0.0192032	0.0542636	12
ENSGACG00000017080			groupIV	5550353	5552459	-1	-0.122209	-0.661711	0.587409	3.32	9.90965	0.0193499	0.0546692	12
ENSGACG00000016734	ANKRD50	ankyrin repeat domain 50 [Source:HGNC Symbol;Acc:HGNC:29223]	groupIV	3512927	3533277	-1	0.105223	0.18808	-0.235429	5.68859	9.90689	0.0193744	0.0547353	10
ENSGACG00000008553	atp6v0a1a	ATPase, H+ transporting, lysosomal V0 subunit a isoform 1a [Source:ZFIN;Acc:ZDB-GENE-030131-3027]	groupXI	5708601	5718665	-1	-0.0816199	-0.335824	0.223893	4.83225	9.89562	0.0194745	0.0550091	12
ENSGACG00000003818	zgc:91849	zgc:91849 [Source:ZFIN;Acc:ZDB-GENE-040718-438]	groupXVI	8681508	8688504	-1	-0.103988	-1.21725	1.12825	2.1639	9.87474	0.0196614	0.0555309	9
ENSGACG00000020643	cryaba	crystallin, alpha B, a [Source:ZFIN;Acc:ZDB-GENE-991119-2]	groupVII	21680381	21681616	-1	-0.158744	-0.41308	0.0135168	4.63544	9.86165	0.0197795	0.0558428	11
ENSGACG00000010291	wu:fj39g12	wu:fj39g12 [Source:ZFIN;Acc:ZDB-GENE-030131-7901]	groupXX	11787698	11788302	-1	0.295587	0.349863	-0.0193329	5.93072	9.84887	0.0198954	0.0561609	10
ENSGACG00000020208	btg3	B-cell translocation gene 3 [Source:ZFIN;Acc:ZDB-GENE-031113-19]	groupVII	13573625	13574965	1	0.199827	-0.224724	-0.497563	1.92271	9.82419	0.0201212	0.0567795	10
ENSGACG00000010406			groupI	10842240	10844758	1	0.242843	-1.77784	1.24395	-1.15864	9.82353	0.0201273	0.0567936	9
ENSGACG00000010079			groupXVII	10406369	10422223	1	-0.412604	-1.0879	-0.0598042	5.95505	9.82252	0.0201367	0.0568137	13
ENSGACG00000010226	p2ry12	purinergic receptor P2Y, G-protein coupled, 12 [Source:ZFIN;Acc:ZDB-GENE-110208-4]	groupI	10334339	10336553	-1	0.161566	-1.32225	0.926566	4.32754	9.81346	0.0202202	0.0570431	9
ENSGACG00000004673	snx5	sorting nexin 5 [Source:ZFIN;Acc:ZDB-GENE-040426-2857]	groupVI	5842529	5847391	1	-0.0241669	-0.549555	0.415174	4.23882	9.81236	0.0202304	0.0570687	12
ENSGACG00000001959	atp1a3a	ATPase, Na+/K+ transporting, alpha 3a polypeptide [Source:ZFIN;Acc:ZDB-GENE-001212-7]	groupX	945775	970597	1	-0.0493509	0.220446	-0.111409	8.43188	9.79698	0.0203731	0.0574617	10
ENSGACG00000017589			groupII	22718785	22722344	-1	0.327186	0.0236821	3.72681	0.139042	9.79486	0.0203929	0.0575144	5
ENSGACG00000011084	kcng1	potassium voltage-gated channel, subfamily G, member 1 [Source:ZFIN;Acc:ZDB-GENE-080220-5]	groupXII	14466359	14469568	-1	0.450154	0.37481	-0.00113691	2.72074	9.79116	0.0204274	0.0576085	10
ENSGACG00000007718	npc2	Niemann-Pick disease, type C2 [Source:ZFIN;Acc:ZDB-GENE-021206-13]	groupXV	4827386	4829230	1	-0.118758	-0.658469	0.323758	4.89343	9.79071	0.0204316	0.0576173	12
ENSGACG00000005385	GALNT3	polypeptide N-acetylgalactosaminyltransferase 3 [Source:HGNC Symbol;Acc:HGNC:4125]	groupXVI	10644150	10648972	-1	0.0865151	-0.209177	-0.46372	2.81893	9.78069	0.0205253	0.0578721	10
ENSGACG00000011884	MSRB1 (2 of 2)	methionine sulfoxide reductase B1 [Source:HGNC Symbol;Acc:HGNC:14133]	groupXI	10897156	10899020	-1	0.253115	-0.502259	-0.157928	2.69493	9.76596	0.020664	0.0582568	11
ENSGACG00000003346	inpp5f	inositol polyphosphate-5-phosphatase F [Source:ZFIN;Acc:ZDB-GENE-041111-194]	groupVI	2925683	2934870	-1	0.239684	-0.0926037	-0.102971	5.66772	9.76243	0.0206974	0.0583475	10
ENSGACG00000005156			groupXV	1454413	1458371	-1	1.41478	-1.14606	-1.18834	-0.908959	9.75931	0.0207269	0.0584244	7
ENSGACG00000004264	glmnb	glomulin, FKBP associated protein b [Source:ZFIN;Acc:ZDB-GENE-080723-14]	groupVIII	2393415	2398406	1	0.116948	-1.59291	0.482578	0.0350136	9.75663	0.0207522	0.0584926	9
ENSGACG00000019081			groupVII	2506486	2507989	-1	0.832693	-1.12852	-0.232731	1.87325	9.75447	0.0207728	0.0585474	7
ENSGACG00000001519	itgb2	integrin, beta 2 [Source:ZFIN;Acc:ZDB-GENE-110411-4]	groupXVI	427012	442506	-1	0.325	-1.40952	0.914944	5.49306	9.74981	0.0208171	0.0586688	9
ENSGACG00000008268	EVC2	Ellis van Creveld syndrome 2 [Source:HGNC Symbol;Acc:HGNC:19747]	groupXVII	7780541	7790696	1	-0.777208	-0.218125	0.0490486	3.21465	9.74751	0.0208389	0.0587272	10
ENSGACG00000007959	lcp1	lymphocyte cytosolic plastin 1 [Source:ZFIN;Acc:ZDB-GENE-991213-5]	groupXVI	15774042	15783144	-1	0.226549	-1.26522	1.03312	5.06616	9.73422	0.0209658	0.0590817	9
ENSGACG00000005500	ptchd1	patched domain containing 1 [Source:ZFIN;Acc:ZDB-GENE-061220-1]	groupXXI	11375961	11384054	1	0.222928	0.199902	-0.165982	4.62755	9.73223	0.0209849	0.0591322	10
ENSGACG00000013438			groupI	18046339	18053773	-1	0.256554	-0.447625	0.19191	4.66767	9.72869	0.0210189	0.0592215	10
ENSGACG00000014680	hsd17b14	hydroxysteroid (17-beta) dehydrogenase 14 [Source:ZFIN;Acc:ZDB-GENE-040801-24]	groupXI	15718986	15722215	-1	0.108402	-1.47944	0.613051	0.833295	9.72805	0.0210251	0.0592357	9
ENSGACG00000009363	il10ra	interleukin 10 receptor, alpha [Source:ZFIN;Acc:ZDB-GENE-070905-4]	groupI	8950903	8953636	-1	0.227768	-1.57275	0.89834	1.17334	9.71879	0.0211142	0.0594769	9
ENSGACG00000013216			groupXVIII	15307548	15316206	-1	0.867407	-0.74762	0.85818	1.73709	9.70712	0.0212271	0.0597817	12
ENSGACG00000016746	colm	collomin [Source:ZFIN;Acc:ZDB-GENE-050119-4]	groupII	18045594	18048728	1	-0.0375726	-0.414725	0.868128	0.978897	9.6955	0.02134	0.0600834	12
ENSGACG00000011335	CPNE9 (2 of 2)	copine family member IX [Source:HGNC Symbol;Acc:HGNC:24336]	groupXVII	12166388	12221168	-1	0.108149	0.283607	0.0628045	5.19486	9.68602	0.0214325	0.0603405	10
ENSGACG00000004454	dennd2c	DENN/MADD domain containing 2C [Source:ZFIN;Acc:ZDB-GENE-081105-71]	groupXII	4036539	4046719	-1	0.147303	-0.107282	-0.531727	3.00517	9.672	0.0215703	0.0607217	10
ENSGACG00000020479	si:ch211-274p24.3	si:ch211-274p24.3 [Source:ZFIN;Acc:ZDB-GENE-091118-96]	groupVII	19122394	19127881	-1	-0.713691	-1.42599	-0.193692	-0.451986	9.6691	0.0215988	0.0607986	13
ENSGACG00000013573	prf1.1	perforin 1.1 [Source:ZFIN;Acc:ZDB-GENE-111212-2]	groupXI	13299458	13302397	1	0.58279	-1.78891	0.43663	-0.252319	9.66463	0.0216429	0.0609195	9
ENSGACG00000008008			groupXV	5346398	5347976	-1	-0.973876	-1.53969	1.37196	-1.78112	9.66389	0.0216503	0.0609368	9
ENSGACG00000011793			groupXV	11611703	11612743	1	-0.549377	-1.40503	-0.232471	1.77465	9.66223	0.0216667	0.0609797	13
ENSGACG00000000605	LIMA1 (1 of 2)	LIM domain and actin binding 1 [Source:HGNC Symbol;Acc:HGNC:24636]	scaffold_27	1279547	1289829	-1	-0.106941	-0.553019	0.344405	1.8342	9.64997	0.0217883	0.0613118	12
ENSGACG00000011411	es1	es1 protein [Source:ZFIN;Acc:ZDB-GENE-980526-188]	groupXIII	12952685	12958203	-1	0.024755	-0.694931	0.424223	4.67968	9.64943	0.0217936	0.0613201	12
ENSGACG00000006392	ptprna	protein tyrosine phosphatase, receptor type, Na [Source:ZFIN;Acc:ZDB-GENE-030131-3511]	groupXVI	12223208	12236463	1	-0.0410532	0.194994	0.129883	8.28394	9.64555	0.0218323	0.0614255	10
ENSGACG00000014777	socs7	suppressor of cytokine signaling 7 [Source:ZFIN;Acc:ZDB-GENE-080204-125]	groupXI	15885037	15887971	1	-0.29269	0.00314682	0.696077	4.31873	9.63578	0.0219299	0.0616867	12
ENSGACG00000006472	siae (2 of 2)	sialic acid acetylesterase [Source:ZFIN;Acc:ZDB-GENE-040426-1032]	groupI	3185346	3192141	-1	0.142657	-0.0141739	0.425507	3.62344	9.61323	0.0221568	0.0623181	12
ENSGACG00000019231	ccdc88aa	coiled-coil domain containing 88Aa [Source:ZFIN;Acc:ZDB-GENE-100701-2]	groupIX	16073061	16085439	1	-0.227996	0.321153	0.186002	6.37184	9.60415	0.0222488	0.0625733	10
ENSGACG00000000845	slc38a3a	solute carrier family 38, member 3a [Source:ZFIN;Acc:ZDB-GENE-070615-25]	scaffold_27	2474900	2501949	-1	-0.252392	0.141727	-0.132405	6.74678	9.59795	0.0223118	0.0627391	10
ENSGACG00000001296	tpm3	tropomyosin 3 [Source:ZFIN;Acc:ZDB-GENE-030826-16]	scaffold_130	156147	165885	1	-2.39773	-0.134497	-1.6743	-1.14254	9.59787	0.0223126	0.0627391	3
ENSGACG00000018867	KHNYN	KH and NYN domain containing [Source:HGNC Symbol;Acc:HGNC:20166]	groupVII	1452630	1459173	1	-0.164415	-0.748909	0.0592782	2.59808	9.59632	0.0223284	0.0627801	11
ENSGACG00000001244	REM2 (1 of 2)	RAS (RAD and GEM)-like GTP binding 2 [Source:HGNC Symbol;Acc:HGNC:20248]	scaffold_891	4973	8608	-1	0.209666	0.175264	0.161213	4.66449	9.59564	0.0223354	0.0627963	10
ENSGACG00000017927	cebpd	CCAAT/enhancer binding protein (C/EBP), delta [Source:ZFIN;Acc:ZDB-GENE-020111-4]	groupIII	16376602	16377524	-1	-0.335041	-0.446958	0.774967	3.86876	9.5805	0.0224902	0.0632178	12
ENSGACG00000018355	hbegfb	heparin-binding EGF-like growth factor b [Source:ZFIN;Acc:ZDB-GENE-070820-6]	groupIV	13294516	13295502	1	-0.14588	-0.959251	0.546054	1.79926	9.57859	0.0225098	0.0632692	12
ENSGACG00000019327	lygl1	lysozyme g-like 1 [Source:ZFIN;Acc:ZDB-GENE-040718-461]	groupIX	16510433	16512041	1	1.17362	-1.96091	-0.484059	-0.218845	9.57279	0.0225695	0.0634231	7
ENSGACG00000010785	si:ch211-13k12.1	si:ch211-13k12.1 [Source:ZFIN;Acc:ZDB-GENE-050208-116]	groupXIX	12707400	12723545	1	-0.0789714	-1.72771	1.2623	-1.32555	9.55786	0.0227237	0.0638461	9
ENSGACG00000008686			groupV	10730136	10744608	-1	0.638746	-2.07336	0.882933	0.512816	9.55151	0.0227896	0.0640277	6
ENSGACG00000002037	ATAD2 (1 of 2)	ATPase family, AAA domain containing 2 [Source:HGNC Symbol;Acc:HGNC:30123]	scaffold_472	904	4317	1	0.938285	-0.362297	0.163037	2.00078	9.53264	0.0229866	0.0645706	10
ENSGACG00000000507	gnrhr1	gonadotropin releasing hormone receptor 1 [Source:ZFIN;Acc:ZDB-GENE-090128-2]	scaffold_101	279647	283887	-1	0.304164	-0.0864431	-0.235274	3.44876	9.49379	0.0233975	0.065714	10
ENSGACG00000003168	zgc:112285	zgc:112285 [Source:ZFIN;Acc:ZDB-GENE-050913-132]	groupV	2517084	2519085	1	1.52474	-0.72965	-4.026	1.18466	9.49199	0.0234167	0.0657607	7
ENSGACG00000010263	CD97 (1 of 2)	CD97 molecule [Source:HGNC Symbol;Acc:HGNC:1711]	groupXI	7947648	7954421	-1	0.105911	-1.03996	0.499978	3.30671	9.48524	0.0234888	0.0659561	12
ENSGACG00000002439	degs1	degenerative spermatocyte homolog 1, lipid desaturase (Drosophila) [Source:ZFIN;Acc:ZDB-GENE-030131-5283]	groupVI	624617	631220	-1	-0.0844344	-0.313078	-0.094127	4.03895	9.47754	0.0235715	0.0661847	11
ENSGACG00000013350	PECAM1 (1 of 2)	platelet/endothelial cell adhesion molecule 1 [Source:HGNC Symbol;Acc:HGNC:8823]	groupXI	12871307	12877357	-1	-0.0709721	0.307967	0.21975	4.3874	9.47315	0.0236187	0.0663136	10
ENSGACG00000019751	TMEM179B	transmembrane protein 179B [Source:HGNC Symbol;Acc:HGNC:33744]	groupVII	7496418	7498823	1	0.244252	-1.2279	0.682673	1.1301	9.47088	0.0236432	0.0663749	9
ENSGACG00000011575			groupXV	11264050	11265010	-1	0.343278	-0.931622	0.271099	1.69128	9.45545	0.0238101	0.0668308	12
ENSGACG00000019597			groupIX	18440029	18440714	1	0.113119	-2.21365	1.23425	-0.807903	9.45538	0.0238108	0.0668308	6
ENSGACG00000006921	cxcl12a	chemokine (C-X-C motif) ligand 12a (stromal cell-derived factor 1) [Source:ZFIN;Acc:ZDB-GENE-030318-1]	groupVI	8102677	8107213	1	-0.638392	-0.43609	0.235013	2.88304	9.45058	0.0238629	0.0669699	10
ENSGACG00000006782	zgc:193593	zgc:193593 [Source:ZFIN;Acc:ZDB-GENE-080723-21]	groupXV	3395955	3397738	1	0.0217084	-0.991384	0.790464	2.44222	9.44732	0.0238985	0.0670623	12
ENSGACG00000014911	ca8	carbonic anhydrase VIII [Source:ZFIN;Acc:ZDB-GENE-050417-26]	groupIII	6175595	6191434	1	-0.446917	-0.623978	-0.132207	4.59781	9.44515	0.0239221	0.0671249	11
ENSGACG00000019629	ADAMTSL1	ADAMTS-like 1 [Source:HGNC Symbol;Acc:HGNC:14632]	groupVII	6808550	6819446	-1	0.512346	-0.320907	0.168205	2.18589	9.436	0.024022	0.0674016	10
ENSGACG00000005153	tulp1b	tubby like protein 1b [Source:ZFIN;Acc:ZDB-GENE-110411-113]	groupXVII	3375149	3377674	-1	-0.364612	-1.38874	1.13095	-0.434203	9.42999	0.0240879	0.0675828	9
ENSGACG00000013223	aim1a	absent in melanoma 1a [Source:ZFIN;Acc:ZDB-GENE-041008-100]	groupXV	15668284	15673979	-1	-0.202051	-0.260061	0.599267	2.30931	9.42833	0.0241062	0.0676304	12
ENSGACG00000001729			scaffold_882	1249	3529	1	-0.0494218	-3.215	1.20665	-1.2275	9.42623	0.0241292	0.0676876	6
ENSGACG00000016508	ttyh3b	tweety homolog 3b (Drosophila) [Source:ZFIN;Acc:ZDB-GENE-051120-105]	groupIX	4423617	4442232	-1	0.0719025	0.241181	-0.114612	7.32197	9.42583	0.0241337	0.0676964	10
ENSGACG00000006551	gpsm2l	G-protein signalling modulator 2, like [Source:ZFIN;Acc:ZDB-GENE-041010-223]	groupVIII	6941174	6957175	1	0.210455	-0.86479	0.723026	1.99005	9.40038	0.0244151	0.0684784	12
ENSGACG00000019849			groupIV	30881750	30882582	1	-0.673497	0.669625	0.456982	1.02228	9.39558	0.0244685	0.0686231	10
ENSGACG00000004668	kif26bb	kinesin family member 26Bb [Source:ZFIN;Acc:ZDB-GENE-041001-188]	groupXVIII	1254361	1269480	-1	-0.335092	-1.06525	-0.130436	3.20568	9.38459	0.0245914	0.0689577	13
ENSGACG00000005218	KCNA10 (1 of 2)	potassium channel, voltage gated shaker related subfamily A, member 10 [Source:HGNC Symbol;Acc:HGNC:6219]	groupXVII	3419388	3421085	-1	0.329323	-0.918923	0.555375	0.625659	9.384	0.0245979	0.0689686	12
ENSGACG00000009671	DNASE2B	deoxyribonuclease II beta [Source:HGNC Symbol;Acc:HGNC:28875]	groupVIII	12463843	12466855	1	0.312007	-1.30315	1.01207	1.66024	9.37433	0.0247066	0.0692656	9
ENSGACG00000019798	COL9A1 (2 of 2)	collagen, type IX, alpha 1 [Source:HGNC Symbol;Acc:HGNC:2217]	groupIX	19544951	19558346	-1	0.0880342	-0.546273	1.10189	2.39335	9.35078	0.024973	0.0700049	12
ENSGACG00000018163	ITGAL	integrin, alpha L (antigen CD11A (p180), lymphocyte function-associated antigen 1; alpha polypeptide) [Source:HGNC Symbol;Acc:HGNC:6148]	groupIX	10183494	10195276	-1	0.0530668	-1.77193	0.626994	2.49233	9.34543	0.0250339	0.0701717	6
ENSGACG00000016918	myo9b	myosin IXb [Source:ZFIN;Acc:ZDB-GENE-030131-938]	groupIII	12322870	12341345	1	-0.119363	-1.46667	0.838219	0.587255	9.33903	0.0251069	0.0703687	9
ENSGACG00000014806	itga3a	integrin, alpha 3a [Source:ZFIN;Acc:ZDB-GENE-090805-3]	groupXI	16001449	16024182	-1	-0.314394	0.429533	0.808335	4.18302	9.32338	0.0252864	0.0708564	10
ENSGACG00000013089	OTOGL	otogelin-like [Source:HGNC Symbol;Acc:HGNC:26901]	groupXIX	16792927	16814426	-1	0.198431	-0.520448	0.747055	1.13569	9.30902	0.0254523	0.0713096	12
ENSGACG00000009079	crygs2	crystallin, gamma S2 [Source:ZFIN;Acc:ZDB-GENE-050126-3]	groupXVI	17676449	17677821	1	1.80772	0.656489	-2.66801	-1.19297	9.29681	0.0255942	0.0716874	7
ENSGACG00000002398	cry3	cryptochrome 3 [Source:ZFIN;Acc:ZDB-GENE-010426-6]	groupXIX	1002682	1016637	-1	0.465758	0.534207	0.0388254	3.95236	9.29031	0.0256699	0.0718957	10
ENSGACG00000003835	PIP5KL1 (1 of 2)	phosphatidylinositol-4-phosphate 5-kinase-like 1 [Source:HGNC Symbol;Acc:HGNC:28711]	groupXIII	1125165	1128921	1	1.08814	0.581369	0.489371	-0.07285	9.28487	0.0257336	0.0720662	10
ENSGACG00000019494			groupIV	25482617	25490893	-1	-0.969857	-3.77802	-0.194893	0.0642675	9.27093	0.0258974	0.072509	13
ENSGACG00000011281	C2CD3	C2 calcium-dependent domain containing 3 [Source:HGNC Symbol;Acc:HGNC:24564]	groupI	12379163	12390950	-1	-0.088525	0.0908364	-0.275498	4.32027	9.26841	0.0259271	0.0725844	10
ENSGACG00000011942	kcnn3	potassium intermediate/small conductance calcium-activated channel, subfamily N, member 3 [Source:ZFIN;Acc:ZDB-GENE-100921-56]	groupXX	12933802	12963689	-1	0.287258	0.193673	0.0968479	3.31182	9.2594	0.0260337	0.0728707	10
ENSGACG00000016365	NFATC3	nuclear factor of activated T-cells, cytoplasmic, calcineurin-dependent 3 [Source:HGNC Symbol;Acc:HGNC:7777]	groupII	14997944	15034759	-1	-0.297839	-0.801512	-0.0854014	2.47831	9.25816	0.0260483	0.0729076	11
ENSGACG00000020253	trpv1	transient receptor potential cation channel, subfamily V, member 1 [Source:ZFIN;Acc:ZDB-GENE-030912-8]	groupVII	14974131	14980077	-1	0.387081	-1.30002	0.917983	0.877506	9.25787	0.0260517	0.0729134	9
ENSGACG00000019290	ttc26	tetratricopeptide repeat domain 26 [Source:ZFIN;Acc:ZDB-GENE-041212-41]	groupIX	16355818	16364657	-1	-0.124925	0.311633	0.128974	4.81556	9.25671	0.0260655	0.0729478	10
ENSGACG00000014094	tesca	tescalcin a [Source:ZFIN;Acc:ZDB-GENE-040426-2632]	groupXIII	18095591	18101339	1	-0.311585	-0.471866	-0.0988118	2.86126	9.25575	0.026077	0.0729759	11
ENSGACG00000001143			scaffold_27	3205372	3219593	-1	-0.282351	-0.655267	-0.0347766	7.05689	9.25452	0.0260915	0.0730052	11
ENSGACG00000011652	PRKCA (1 of 2)	protein kinase C, alpha [Source:HGNC Symbol;Acc:HGNC:9393]	groupXI	10494542	10558232	-1	-0.268677	-0.573501	0.0630684	5.37209	9.25451	0.0260917	0.0730052	11
ENSGACG00000001591	bicd2	bicaudal D homolog 2 (Drosophila) [Source:ZFIN;Acc:ZDB-GENE-120717-1]	scaffold_27	4674493	4681833	-1	-0.148205	-0.372386	0.00976069	4.65372	9.24195	0.0262411	0.0734193	11
ENSGACG00000000964			scaffold_37	1623366	1624805	-1	-0.642179	-0.269015	0.0517051	2.93648	9.22462	0.0264488	0.0739858	10
ENSGACG00000020443	rce1b	RCE1 homolog, prenyl protein peptidase (S. cerevisiae) b [Source:ZFIN;Acc:ZDB-GENE-091204-277]	groupVII	18640111	18642468	-1	0.0632931	-1.28768	1.0408	-0.984298	9.22457	0.0264494	0.0739858	9
ENSGACG00000008100			groupV	9999445	10003516	-1	0.128204	-0.350258	0.264521	3.48548	9.22007	0.0265036	0.0741335	12
ENSGACG00000009535	SLC8B1	solute carrier family 8 (sodium/lithium/calcium exchanger), member B1 [Source:HGNC Symbol;Acc:HGNC:26175]	groupXIII	9337546	9342577	1	0.0258765	-0.876284	0.602401	1.81848	9.21375	0.0265799	0.0743429	12
ENSGACG00000019795	lrrc4.1	leucine rich repeat containing 4.1 [Source:ZFIN;Acc:ZDB-GENE-041210-129]	groupIV	30169143	30171953	-1	0.101133	0.265951	0.0252191	5.37553	9.21165	0.0266053	0.0744098	10
ENSGACG00000011520			groupXI	10376604	10377473	1	0.397254	-1.33021	0.922331	0.587613	9.19103	0.026856	0.0750946	9
ENSGACG00000017096	slc6a5	solute carrier family 6 (neurotransmitter transporter, glycine), member 5 [Source:ZFIN;Acc:ZDB-GENE-050105-2]	groupII	20027174	20041230	1	0.0705464	-1.6355	0.920378	0.531786	9.19045	0.026863	0.0751102	9
ENSGACG00000002059	cerkl	ceramide kinase-like [Source:ZFIN;Acc:ZDB-GENE-070410-38]	groupXVI	3513049	3529958	-1	-0.479218	-1.12697	-0.0826451	1.31464	9.16888	0.0271278	0.07583	13
ENSGACG00000001606			scaffold_106	73669	137197	1	-0.460449	0.266381	0.325205	5.11556	9.16617	0.0271612	0.0759108	10
ENSGACG00000012026	prcp	prolylcarboxypeptidase (angiotensinase C) [Source:ZFIN;Acc:ZDB-GENE-040718-447]	groupI	14472720	14482140	1	0.268185	-1.18343	0.746644	3.37247	9.15974	0.0272408	0.0761291	9
ENSGACG00000007820	zgc:92313	zgc:92313 [Source:ZFIN;Acc:ZDB-GENE-040718-339]	groupV	9767169	9769690	-1	-1.97234	-1.37452	1.8967	-1.75938	9.12289	0.0277008	0.077381	9
ENSGACG00000010645	thyn1	thymocyte nuclear protein 1 [Source:ZFIN;Acc:ZDB-GENE-040426-1585]	groupI	11088226	11089320	1	0.100291	-0.0599675	0.350162	3.27886	9.10705	0.0279009	0.0779358	12
ENSGACG00000009676			groupVIII	12468629	12470421	1	-0.32669	-1.1312	1.70561	-0.524045	9.10227	0.0279617	0.0781012	9
ENSGACG00000000107	psmb9a (1 of 5)	proteasome (prosome, macropain) subunit, beta type, 9a [Source:ZFIN;Acc:ZDB-GENE-990415-140]	scaffold_58	768224	771333	-1	-0.432897	-1.09361	1.45327	2.39361	9.10046	0.0279846	0.0781567	9
ENSGACG00000011282	gltpd1	glycolipid transfer protein domain containing 1 [Source:ZFIN;Acc:ZDB-GENE-040801-240]	groupXII	15045612	15047301	1	-0.285544	0.0255622	0.186979	4.20692	9.09483	0.0280562	0.0783441	10
ENSGACG00000018432	stc2a	stanniocalcin 2a [Source:ZFIN;Acc:ZDB-GENE-041008-14]	groupIV	13930376	13933821	-1	-0.148749	-0.194599	0.710386	1.92615	9.08154	0.0282262	0.0788057	12
ENSGACG00000020896	rhogb	ras homolog gene family, member Gb [Source:ZFIN;Acc:ZDB-GENE-030131-8877]	groupVII	27688913	27695543	-1	0.267722	-1.32318	0.961531	3.38063	9.08075	0.0282363	0.0788255	9
ENSGACG00000003089	necab2	N-terminal EF-hand calcium binding protein 2 [Source:ZFIN;Acc:ZDB-GENE-050706-167]	groupXIX	2691135	2740776	1	-0.024954	0.308434	-0.0638989	5.15846	9.07711	0.028283	0.0789515	10
ENSGACG00000017508	trpm1a (1 of 2)	transient receptor potential cation channel, subfamily M, member 1a [Source:ZFIN;Acc:ZDB-GENE-070112-1372]	groupII	22384178	22393916	1	-0.0755812	-2.49524	1.6995	-2.54623	9.06518	0.0284367	0.0793676	6
ENSGACG00000002064	neurod	neurogenic differentiation [Source:ZFIN;Acc:ZDB-GENE-990415-172]	groupXVI	3540086	3541895	-1	-0.607953	-1.05404	-0.191554	5.71134	9.06378	0.0284548	0.0794095	13
ENSGACG00000018169	gabra6a	gamma-aminobutyric acid (GABA) A receptor, alpha 6a [Source:ZFIN;Acc:ZDB-GENE-040426-1692]	groupIV	11817769	11822613	-1	-0.766668	-1.65848	1.06916	-1.41551	9.06381	0.0284545	0.0794095	9
ENSGACG00000016922	macrod1	MACRO domain containing 1 [Source:ZFIN;Acc:ZDB-GENE-040912-100]	groupIV	5083045	5165312	-1	-0.179721	0.488487	-0.658465	2.81682	9.06253	0.0284709	0.0794502	10
ENSGACG00000010667	abcg8	ATP-binding cassette, sub-family G (WHITE), member 8 [Source:ZFIN;Acc:ZDB-GENE-050517-41]	groupVI	13374118	13380352	1	0.259053	3.4317	0.0151761	-1.30777	9.05927	0.0285131	0.0795635	8
ENSGACG00000019896	RPGRIP1	retinitis pigmentosa GTPase regulator interacting protein 1 [Source:HGNC Symbol;Acc:HGNC:13436]	groupVII	8099373	8106000	1	0.164519	-2.18559	1.59382	-1.09784	9.0577	0.0285335	0.0796118	6
ENSGACG00000001673	rac2	ras-related C3 botulinum toxin substrate 2 (rho family, small GTP binding protein Rac2) [Source:ZFIN;Acc:ZDB-GENE-040625-27]	scaffold_664	9244	11806	-1	0.280019	-0.998516	0.958568	3.91052	9.05749	0.0285362	0.0796151	12
ENSGACG00000002806	slc12a5b	solute carrier family 12 (potassium/chloride transporter), member 5b [Source:ZFIN;Acc:ZDB-GENE-080707-1]	groupXII	669406	674050	-1	0.0105924	-0.719104	0.230935	2.84737	9.05555	0.0285613	0.0796808	12
ENSGACG00000009232	STAC	SH3 and cysteine rich domain [Source:HGNC Symbol;Acc:HGNC:11353]	groupXV	7007914	7026200	-1	-0.646145	-0.732711	-0.0312165	2.41101	9.05474	0.0285719	0.0797017	11
ENSGACG00000003296	otc	ornithine carbamoyltransferase [Source:ZFIN;Acc:ZDB-GENE-070912-422]	groupXVI	7634747	7637939	-1	0.269381	-0.200869	0.580821	1.40188	9.04877	0.0286494	0.0799092	12
ENSGACG00000020744	sh3pxd2b	SH3 and PX domains 2B [Source:ZFIN;Acc:ZDB-GENE-060810-52]	groupVII	23858080	23881792	1	-0.447113	-0.958559	-0.150638	5.42022	9.04838	0.0286545	0.079919	13
ENSGACG00000005308	THNSL1	threonine synthase-like 1 (S. cerevisiae) [Source:HGNC Symbol;Acc:HGNC:26160]	groupXXI	11117318	11119516	-1	-0.138734	0.725463	-1.11801	0.31242	9.0463	0.0286816	0.0799902	10
ENSGACG00000020444	ehbp1l1b	EH domain binding protein 1-like 1b [Source:ZFIN;Acc:ZDB-GENE-091204-238]	groupVII	18643279	18663673	-1	-0.062593	-0.866409	0.77746	3.12546	9.03888	0.0287784	0.0802514	12
ENSGACG00000000062	zgc:77375	zgc:77375 [Source:ZFIN;Acc:ZDB-GENE-040426-1827]	scaffold_99	46014	49113	1	0.196024	0.184684	-0.01922	4.97269	9.03322	0.0288525	0.0804493	10
ENSGACG00000004495	C20orf194	chromosome 20 open reading frame 194 [Source:HGNC Symbol;Acc:HGNC:17721]	groupXV	485620	499810	-1	0.318119	0.142008	-0.333639	7.43587	9.02078	0.0290159	0.0808829	10
ENSGACG00000012528	ethe1	ethylmalonic encephalopathy 1 [Source:ZFIN;Acc:ZDB-GENE-040426-2503]	groupXX	14018982	14023948	1	-0.255811	0.134166	0.155855	5.07146	9.01622	0.029076	0.0810463	10
ENSGACG00000020845	rad51d	RAD51 homolog D (S. cerevisiae) [Source:ZFIN;Acc:ZDB-GENE-040426-2490]	groupVII	26760863	26768254	1	-0.39978	-0.73899	1.08286	0.793521	9.01253	0.0291248	0.0811733	9
ENSGACG00000019438	BTN3A1	butyrophilin, subfamily 3, member A1 [Source:HGNC Symbol;Acc:HGNC:1138]	groupVII	4835025	4838108	-1	0.852261	-0.323927	-0.318108	1.80438	9.00952	0.0291646	0.0812753	10
ENSGACG00000003614	bdh1	3-hydroxybutyrate dehydrogenase, type 1 [Source:ZFIN;Acc:ZDB-GENE-070410-130]	groupXXI	8259730	8263422	-1	-0.438252	-0.32249	0.239923	4.10241	9.00811	0.0291833	0.0813232	11
ENSGACG00000003976	WDR60	WD repeat domain 60 [Source:HGNC Symbol;Acc:HGNC:21862]	groupXXI	9264263	9270619	1	-0.205675	0.0574797	-0.209751	4.23736	8.99965	0.0292956	0.0816183	10
ENSGACG00000003329	slc1a8a	solute carrier family 1 (glutamate transporter), member 8a [Source:ZFIN;Acc:ZDB-GENE-101111-8]	groupVIII	1360083	1367088	-1	0.170359	-2.39877	2.20959	-2.32347	8.99152	0.0294038	0.0819153	5
ENSGACG00000013145	adck3	aarF domain containing kinase 3 [Source:ZFIN;Acc:ZDB-GENE-040718-487]	groupXVIII	15221188	15227968	1	0.0433175	-0.278374	0.324647	4.24521	8.97747	0.029592	0.0824352	12
ENSGACG00000004655	chrna4b	cholinergic receptor, nicotinic, alpha 4b [Source:ZFIN;Acc:ZDB-GENE-090505-3]	groupXII	4256970	4263701	1	0.330916	0.341012	0.268084	2.06752	8.97266	0.0296566	0.0826107	10
ENSGACG00000019261	CLDN15 (1 of 2)	claudin 15 [Source:HGNC Symbol;Acc:HGNC:2036]	groupVII	3092201	3094459	1	-1.33809	-1.02959	1.86382	-1.30826	8.94888	0.0299784	0.0834801	9
ENSGACG00000007524	gpr157	G protein-coupled receptor 157 [Source:ZFIN;Acc:ZDB-GENE-050809-126]	groupXII	9926338	9929517	-1	-0.113017	-1.02447	0.458904	1.16562	8.94503	0.0300308	0.0836121	12
ENSGACG00000008615			groupXX	9990377	9996076	1	-0.0679893	0.305755	-0.0309874	6.90034	8.94482	0.0300336	0.0836154	10
ENSGACG00000000188			scaffold_1318	4364	5126	-1	0.0788259	-1.8696	-0.958295	0.169155	8.93476	0.030171	0.0839934	13
ENSGACG00000011606	postnb	periostin, osteoblast specific factor b [Source:ZFIN;Acc:ZDB-GENE-030131-9120]	groupI	13650351	13660833	-1	-0.331807	0.591758	-0.409973	2.91532	8.93148	0.0302159	0.084114	10
ENSGACG00000015384	epha6	eph receptor A6 [Source:ZFIN;Acc:ZDB-GENE-090311-43]	groupII	8148242	8183150	-1	0.209137	0.157657	0.130397	6.17651	8.92246	0.0303398	0.0844451	10
ENSGACG00000015145	fndc7	fibronectin type III domain containing 7 [Source:ZFIN;Acc:ZDB-GENE-070216-2]	groupIII	7006777	7012008	1	-0.30765	-1.16834	1.7035	-0.851381	8.92077	0.030363	0.0845005	9
ENSGACG00000018031	slc44a1a	solute carrier family 44, member 1a [Source:ZFIN;Acc:ZDB-GENE-050417-204]	groupIX	9656750	9663571	-1	0.120565	-0.355849	0.292122	4.0388	8.91795	0.030402	0.0846043	12
ENSGACG00000006101	TCF12 (1 of 2)	transcription factor 12 [Source:HGNC Symbol;Acc:HGNC:11623]	groupXIX	7477087	7484256	1	-0.257495	-0.658368	-0.52876	2.24118	8.9082	0.0305367	0.0849746	11
ENSGACG00000003621	gyg1b	glycogenin 1b [Source:ZFIN;Acc:ZDB-GENE-040625-30]	groupXXI	8263488	8269613	-1	-0.604876	-0.536305	-0.0748754	4.75507	8.9078	0.0305423	0.0849855	11
ENSGACG00000009744			groupX	14993071	14994658	-1	0.955683	-0.0300771	0.999328	-0.376131	8.90735	0.0305484	0.0849981	12
ENSGACG00000009115	plek	pleckstrin [Source:ZFIN;Acc:ZDB-GENE-040426-1506]	groupVI	10585490	10589570	-1	-0.0321268	-1.4193	0.978202	1.49513	8.90334	0.030604	0.0851482	9
ENSGACG00000017067			groupXIV	6755601	6756832	1	-0.0762007	-0.150381	0.647089	1.3192	8.86621	0.0311236	0.0865561	12
ENSGACG00000007985	ctsc	cathepsin C [Source:ZFIN;Acc:ZDB-GENE-030619-9]	groupI	6368016	6374543	1	0.130305	-1.5161	0.648549	4.70878	8.8619	0.0311845	0.0867163	9
ENSGACG00000009695	FAM53B (2 of 2)	family with sequence similarity 53, member B [Source:HGNC Symbol;Acc:HGNC:28968]	groupVI	11688288	11705963	1	-0.0596275	-0.371372	0.0605587	3.48001	8.8543	0.0312921	0.0870014	11
ENSGACG00000004797	padi2	peptidyl arginine deiminase, type II [Source:ZFIN;Acc:ZDB-GENE-031116-67]	groupXVII	2797661	2805248	1	-0.242588	0.459412	0.193991	3.28623	8.85387	0.0312982	0.0870133	10
ENSGACG00000012944	gad1b	glutamate decarboxylase 1b [Source:ZFIN;Acc:ZDB-GENE-030909-3]	groupIII	448107	459938	1	-0.127854	0.192792	0.0895353	8.79514	8.84477	0.0314276	0.0873542	10
ENSGACG00000002392	hs3st3l	heparan sulfate (glucosamine) 3-O-sulfotransferase 3-like [Source:ZFIN;Acc:ZDB-GENE-070202-6]	scaffold_54	1189470	1197851	1	0.0722211	-1.64759	1.28565	-1.21475	8.84082	0.0314839	0.0875061	9
ENSGACG00000008638	aass	aminoadipate-semialdehyde synthase [Source:ZFIN;Acc:ZDB-GENE-061220-8]	groupXIX	9640525	9655560	-1	-0.149627	0.138638	0.186043	4.56793	8.83331	0.0315912	0.0877949	10
ENSGACG00000004902	loxl3b	lysyl oxidase-like 3b [Source:ZFIN;Acc:ZDB-GENE-030131-8210]	groupXV	1315297	1327503	1	0.671708	-0.0202397	-0.266981	3.01172	8.83229	0.0316059	0.0878308	10
ENSGACG00000005558	lingo2	leucine rich repeat and Ig domain containing 2 [Source:ZFIN;Acc:ZDB-GENE-080723-57]	groupXV	1730436	1732274	1	0.0975495	0.281734	-0.0762317	4.04693	8.83154	0.0316166	0.0878557	10
ENSGACG00000007003			groupXI	3717782	3739910	1	-0.0599058	0.0925596	-0.270102	4.14386	8.81927	0.0317929	0.0883361	10
ENSGACG00000006393	pkmb	pyruvate kinase, muscle, b [Source:ZFIN;Acc:ZDB-GENE-040801-230]	groupXIX	7699117	7705618	-1	-1.5268	-0.753138	-1.01641	-0.555191	8.81681	0.0318283	0.0884297	3
ENSGACG00000014601			groupI	22365015	22396113	-1	0.149589	-0.756586	1.10698	1.30034	8.81024	0.0319233	0.0886792	12
ENSGACG00000006711			groupXV	2986778	2987060	1	-0.053926	-1.88469	0.878685	0.802388	8.80919	0.0319384	0.0887164	6
ENSGACG00000019136	plxnc1	plexin C1 [Source:ZFIN;Acc:ZDB-GENE-030131-1620]	groupIV	21957750	21968421	1	0.294771	-1.16306	0.836422	3.1923	8.79996	0.0320722	0.0890689	9
ENSGACG00000013187	med23	mediator complex subunit 23 [Source:ZFIN;Acc:ZDB-GENE-040724-82]	groupXVIII	15261256	15275935	1	-0.576388	0.0615839	0.0173899	6.14905	8.79464	0.0321496	0.089279	10
ENSGACG00000007282	cxcr4b	chemokine (C-X-C motif), receptor 4b [Source:ZFIN;Acc:ZDB-GENE-010614-1]	groupXVI	14116230	14118276	-1	-0.0483388	-1.43316	1.06911	2.66269	8.79306	0.0321726	0.0893379	9
ENSGACG00000012752	crybb2	crystallin, beta B2 [Source:ZFIN;Acc:ZDB-GENE-060130-1]	groupXIII	14810916	14812259	1	2.98445	-0.0335038	-2.72855	-0.630855	8.78608	0.0322745	0.0896063	7
ENSGACG00000010034	PCP2	Purkinje cell protein 2 [Source:HGNC Symbol;Acc:HGNC:30209]	groupXI	7791014	7795841	-1	0.215074	-1.3108	0.0740365	1.19035	8.78502	0.03229	0.0896446	7
ENSGACG00000010456			groupX	15635802	15640132	-1	-0.322454	-4.73929	3.92536	-2.7031	8.78266	0.0323246	0.0897358	4
ENSGACG00000012769	ighv1-4 (1 of 3)	immunoglobulin heavy variable 1-4 [Source:ZFIN;Acc:ZDB-GENE-040514-1]	groupXI	12330953	12351249	-1	1.02552	-3.32023	1.08621	0.410182	8.77873	0.0323821	0.0898905	5
ENSGACG00000009364	tlr21	toll-like receptor 21 [Source:ZFIN;Acc:ZDB-GENE-040220-4]	groupXX	10893595	10896378	1	0.142532	-1.48338	0.752816	0.562061	8.76705	0.0325539	0.0903576	9
ENSGACG00000017767	gucy1a3	guanylate cyclase 1, soluble, alpha 3 [Source:ZFIN;Acc:ZDB-GENE-050417-230]	groupIX	8635553	8641486	1	0.198977	0.190232	0.00727203	4.68823	8.76606	0.0325685	0.0903932	10
ENSGACG00000014009	si:ch211-79k12.1	si:ch211-79k12.1 [Source:ZFIN;Acc:ZDB-GENE-080303-9]	groupXX	17937881	17945441	1	-0.00412501	-1.37375	0.845593	3.48804	8.76478	0.0325874	0.0904361	9
ENSGACG00000018119	PHYKPL	5-phosphohydroxy-L-lysine phospho-lyase [Source:HGNC Symbol;Acc:HGNC:28249]	groupIV	11482342	11488415	-1	-0.441268	-0.0905514	0.0585422	4.63867	8.75431	0.0327422	0.0908508	10
ENSGACG00000003269	ret	ret proto-oncogene receptor tyrosine kinase [Source:ZFIN;Acc:ZDB-GENE-980526-307]	groupVI	2894196	2901932	1	-0.314722	-0.416338	-0.215751	3.55323	8.74841	0.0328298	0.091089	11
ENSGACG00000013859	zc3h12a	zinc finger CCCH-type containing 12A [Source:ZFIN;Acc:ZDB-GENE-110411-6]	groupXX	17700261	17704760	1	0.15076	-0.780223	0.89119	1.87932	8.73705	0.0329992	0.0915442	12
ENSGACG00000007111	zswim6 (1 of 2)	zinc finger, SWIM-type containing 6 [Source:ZFIN;Acc:ZDB-GENE-060602-4]	groupXIII	6207431	6246104	-1	-0.018974	0.107452	-0.289066	4.4118	8.7323	0.0330702	0.0917313	10
ENSGACG00000001061	nuak2	NUAK family, SNF1-like kinase, 2 [Source:ZFIN;Acc:ZDB-GENE-050208-563]	scaffold_27	3042977	3050106	-1	-0.731124	0.0906631	0.347671	2.11394	8.72643	0.0331582	0.0919654	10
ENSGACG00000018534	tenm1	teneurin transmembrane protein 1 [Source:ZFIN;Acc:ZDB-GENE-060531-26]	groupIV	15373076	15510407	1	0.0833855	0.207632	-0.160826	7.47396	8.71595	0.0333159	0.0923877	10
ENSGACG00000001596	TOP1 (1 of 2)	topoisomerase (DNA) I [Source:HGNC Symbol;Acc:HGNC:11986]	scaffold_180	1399	13644	-1	-0.0049161	0.440805	-0.19646	5.82229	8.71533	0.0333253	0.0924088	10
ENSGACG00000002668	entpd1	ectonucleoside triphosphate diphosphohydrolase 1 [Source:ZFIN;Acc:ZDB-GENE-040801-58]	groupV	1673683	1685493	1	0.232469	-0.754554	0.38219	4.89991	8.71104	0.0333899	0.0925681	12
ENSGACG00000010001	atad1b	ATPase family, AAA domain containing 1b [Source:ZFIN;Acc:ZDB-GENE-030616-44]	groupV	11771822	11778526	1	-0.237268	-0.0542108	0.133487	5.46041	8.71113	0.0333887	0.0925681	10
ENSGACG00000006654	junbb	jun B proto-oncogene b [Source:ZFIN;Acc:ZDB-GENE-040426-2666]	groupXI	3309437	3310423	1	0.266544	0.238731	0.236519	4.33108	8.7107	0.0333952	0.0925777	10
ENSGACG00000006337	ankib1b	ankyrin repeat and IBR domain containing 1b [Source:ZFIN;Acc:ZDB-GENE-100920-6]	groupXX	5978144	5999605	-1	-0.500648	-0.867901	-0.0981253	5.40204	8.70981	0.0334087	0.09261	13
ENSGACG00000011339	ADCY9 (1 of 2)	adenylate cyclase 9 [Source:HGNC Symbol;Acc:HGNC:240]	groupXI	9993572	10013050	1	-0.279347	-0.293684	0.0476553	4.99329	8.70412	0.0334947	0.0928385	11
ENSGACG00000000093	tac1	tachykinin 1 [Source:ZFIN;Acc:ZDB-GENE-060503-904]	scaffold_58	590630	595294	1	-0.187689	0.257336	0.0615974	5.35508	8.69877	0.0335759	0.0930565	10
ENSGACG00000001568	IL17RC	interleukin 17 receptor C [Source:HGNC Symbol;Acc:HGNC:18358]	scaffold_27	4605904	4607228	-1	0.261934	-1.44879	-0.0797064	-0.352236	8.69323	0.0336602	0.093277	7
ENSGACG00000004289	IL12B (1 of 3)	interleukin 12B [Source:HGNC Symbol;Acc:HGNC:5970]	groupXIII	1785250	1786555	-1	-0.470502	0.826415	0.643054	0.159473	8.69265	0.0336691	0.0932968	10
ENSGACG00000008326	csf2rb	colony stimulating factor 2 receptor, beta, low-affinity (granulocyte-macrophage) [Source:ZFIN;Acc:ZDB-GENE-080115-1]	groupXI	5130398	5134910	-1	0.259783	-1.48926	0.877741	1.08093	8.6918	0.033682	0.0933275	9
ENSGACG00000006524	loxhd1b	lipoxygenase homology domains 1b [Source:ZFIN;Acc:ZDB-GENE-081104-370]	groupXIII	5074451	5088689	-1	-1.06813	-1.13985	-0.426861	0.050789	8.68987	0.0337114	0.0933988	13
ENSGACG00000003228	stxbp1b	syntaxin binding protein 1b [Source:ZFIN;Acc:ZDB-GENE-060531-166]	groupXIII	11028	33824	1	0.0965483	-0.782877	0.569432	3.62711	8.684	0.0338011	0.0936337	12
ENSGACG00000006738	pik3c2a	phosphoinositide-3-kinase, class 2, alpha polypeptide [Source:ZFIN;Acc:ZDB-GENE-030328-39]	groupXIX	8023351	8047873	-1	-0.24034	-0.307722	-0.146792	3.93287	8.68189	0.0338334	0.0937114	11
ENSGACG00000002526	GALR1 (1 of 2)	galanin receptor 1 [Source:HGNC Symbol;Acc:HGNC:4132]	groupX	2176422	2178269	1	-0.775302	0.330121	0.0620671	0.851376	8.66597	0.0340781	0.0943739	10
ENSGACG00000000058			scaffold_99	6773	8856	-1	-0.185535	-1.36173	0.10963	1.70035	8.66357	0.034115	0.0944711	13
ENSGACG00000011425	NUGGC (3 of 3)	nuclear GTPase, germinal center associated [Source:HGNC Symbol;Acc:HGNC:33550]	groupXI	10229188	10233182	1	-0.219658	-0.253496	0.704777	4.04006	8.66149	0.0341471	0.0945497	12
ENSGACG00000022735	SNORD22	Small nucleolar RNA SNORD22 [Source:RFAM;Acc:RF00099]	groupVII	7743822	7743948	-1	0.870437	2.20393	0.567923	-0.701444	8.65981	0.0341731	0.0946165	8
ENSGACG00000003218	ctsa	cathepsin A [Source:ZFIN;Acc:ZDB-GENE-030131-537]	groupXVII	486334	490813	-1	0.0661988	-0.6681	0.480742	4.58826	8.65652	0.0342241	0.0947526	12
ENSGACG00000018910	tfec	transcription factor EC [Source:ZFIN;Acc:ZDB-GENE-041210-21]	groupIV	18862829	18870435	1	0.0586637	-1.52126	0.835418	0.201014	8.65067	0.0343146	0.0949982	9
ENSGACG00000010877			groupXII	13773115	13789160	-1	-0.466516	-0.282819	-0.288233	5.59211	8.64499	0.034403	0.0952274	10
ENSGACG00000001900	zic5	zic family member 5 (odd-paired homolog, Drosophila) [Source:ZFIN;Acc:ZDB-GENE-040622-1]	groupXVI	2867278	2869821	-1	-0.183596	-0.548996	-0.369299	3.81096	8.64357	0.0344251	0.0952731	11
ENSGACG00000001429	si:rp71-68n21.9	si:rp71-68n21.9 [Source:ZFIN;Acc:ZDB-GENE-081105-100]	scaffold_115	336850	343148	-1	0.153649	-1.41253	0.955536	0.9364	8.63882	0.0344991	0.0954626	9
ENSGACG00000017079			groupIV	5548883	5549972	-1	-0.0731108	-0.653942	0.533146	3.01741	8.63754	0.0345191	0.0955127	12
ENSGACG00000016122	rgs18	regulator of G-protein signaling 18 [Source:ZFIN;Acc:ZDB-GENE-061013-722]	groupIII	9445520	9448756	-1	0.00117727	-1.27064	0.814326	2.91649	8.62507	0.0347144	0.0960375	9
ENSGACG00000000848	im:7136729	im:7136729 [Source:ZFIN;Acc:ZDB-GENE-041111-14]	scaffold_47	889259	893482	-1	0.160834	-1.09048	0.35516	2.52138	8.62066	0.0347836	0.096224	12
ENSGACG00000017574			groupIV	8185136	8188393	-1	0.625254	-1.78179	0.620189	0.33869	8.61868	0.0348148	0.096305	9
ENSGACG00000002897			groupX	3240832	3242595	-1	1.8245	1.9954	0.76857	0.756825	8.61854	0.034817	0.096306	8
ENSGACG00000009794	csk	c-src tyrosine kinase [Source:ZFIN;Acc:ZDB-GENE-061103-493]	groupXIX	11158713	11169086	1	0.167601	-1.06118	0.746223	1.57035	8.61509	0.0348714	0.0964511	12
ENSGACG00000007829			groupXIX	8889688	8893864	-1	-0.607808	-0.916092	-0.100227	1.00432	8.61229	0.0349155	0.0965627	13
ENSGACG00000016928	PRODH	proline dehydrogenase (oxidase) 1 [Source:HGNC Symbol;Acc:HGNC:9453]	groupXIV	6433673	6440019	1	-0.259146	-0.408302	0.411354	5.51649	8.61145	0.0349288	0.0965942	12
ENSGACG00000020612	slc47a2 (2 of 2)	solute carrier family 47, member 2 [Source:ZFIN;Acc:ZDB-GENE-070112-1472]	groupVII	21416942	21422973	1	-0.947118	0.891915	0.413865	1.37511	8.60762	0.0349894	0.0967568	10
ENSGACG00000006852	PIK3R5 (1 of 2)	phosphoinositide-3-kinase, regulatory subunit 5 [Source:HGNC Symbol;Acc:HGNC:30035]	groupXI	3532009	3537923	-1	-0.0217673	-0.973308	0.947575	3.13629	8.60662	0.0350052	0.0967953	12
ENSGACG00000003731			groupXVII	1163942	1165035	1	0.354091	-1.1925	0.858401	1.72378	8.60301	0.0350623	0.0969478	9
ENSGACG00000001966	ncf2	neutrophil cytosolic factor 2 [Source:ZFIN;Acc:ZDB-GENE-070209-29]	groupXXI	2079984	2084918	-1	0.45026	-1.45892	0.905504	4.2515	8.60162	0.0350845	0.0969987	9
ENSGACG00000003659	ESPNL	espin-like [Source:HGNC Symbol;Acc:HGNC:27937]	groupVIII	1718780	1730079	1	0.349823	-0.856113	1.40579	-1.25203	8.59795	0.0351426	0.097149	12
ENSGACG00000013569	SLC35D3	solute carrier family 35, member D3 [Source:HGNC Symbol;Acc:HGNC:15621]	groupXVIII	15943021	15943865	-1	-0.693716	0.42747	-0.549859	0.338708	8.59656	0.0351648	0.0972052	10
ENSGACG00000013986	aldh1a3	aldehyde dehydrogenase 1 family, member A3 [Source:ZFIN;Acc:ZDB-GENE-061128-2]	groupII	251899	277349	1	-0.421664	-0.858507	0.667199	1.32658	8.59274	0.0352256	0.0973679	12
ENSGACG00000008074	KIF24	kinesin family member 24 [Source:HGNC Symbol;Acc:HGNC:19916]	groupXIII	8166788	8170554	-1	0.350193	-2.29176	0.894104	-1.54627	8.58597	0.0353335	0.0976608	6
ENSGACG00000011156	sult6b1	sulfotransferase family, cytosolic, 6b, member 1 [Source:ZFIN;Acc:ZDB-GENE-050417-228]	groupVI	14351690	14358209	-1	-0.765879	0.332013	-0.242013	2.14929	8.57907	0.0354439	0.097945	10
ENSGACG00000012287	zfyve26	zinc finger, FYVE domain containing 26 [Source:ZFIN;Acc:ZDB-GENE-030131-3286]	groupXV	12232184	12252104	1	-0.499113	0.619013	0.294772	4.36352	8.57391	0.0355267	0.0981685	10
ENSGACG00000005303	paplna	papilin a, proteoglycan-like sulfated glycoprotein [Source:ZFIN;Acc:ZDB-GENE-070815-4]	groupXV	1547817	1561936	-1	0.34736	-1.29935	0.786921	0.671831	8.5709	0.035575	0.0982967	9
ENSGACG00000001459	zgc:56585 (2 of 3)	zgc:56585 [Source:ZFIN;Acc:ZDB-GENE-040426-1084]	scaffold_273	18896	22052	-1	0.58114	-0.0943411	-0.271985	1.93421	8.57022	0.035586	0.0983218	10
ENSGACG00000005268	sft2d1	SFT2 domain containing 1 [Source:ZFIN;Acc:ZDB-GENE-040426-1350]	groupVI	6261976	6270820	-1	-0.0742726	-0.142244	0.275054	4.31542	8.55383	0.0358505	0.0990419	12
ENSGACG00000002529	GAN	gigaxonin [Source:HGNC Symbol;Acc:HGNC:4137]	groupXIX	1547513	1555102	-1	0.0130823	-0.110694	0.34186	3.47644	8.5497	0.0359176	0.0992218	12
ENSGACG00000002266	pcbp3	poly(rC) binding protein 3 [Source:ZFIN;Acc:ZDB-GENE-050522-157]	groupXVI	4908425	4920547	-1	-0.254239	-0.457305	-0.136835	5.37101	8.54928	0.0359244	0.0992352	11
ENSGACG00000005807	psma6l	proteasome (prosome, macropain) subunit, alpha type, 6, like [Source:ZFIN;Acc:ZDB-GENE-010502-2]	groupI	2001693	2004602	-1	0.121551	-0.788329	0.801726	2.03476	8.53962	0.0360816	0.0996534	12
ENSGACG00000003932			groupX	5372498	5374253	1	-0.44509	-0.962211	0.166876	1.15552	8.53252	0.0361975	0.0999682	11

## Sheet: T.DEGx
ensembl_gene_id	gene_name	description	chromosome_name	start_position	end_position	strand	logFC.T30	logFC.T60	logFC.T120	logCPM	LR	PValue	FDR	clus
ENSGACG00000018668			groupVII	518792	520048	1	-7.01256	7.63139	7.05983	-0.0125738	38.2379	2.51693e-08	7.55079e-08	1
ENSGACG00000018113	MAMDC4	MAM domain containing 4 [Source:HGNC Symbol;Acc:HGNC:24083]	groupXIV	11278595	11287976	-1	0.350042	-0.543019	3.12553	3.27806	37.9291	2.92589e-08	8.77716e-08	2
ENSGACG00000003079	grk1a (1 of 2)	G protein-coupled receptor kinase 1 a [Source:ZFIN;Acc:ZDB-GENE-050823-1]	groupXVI	7497167	7500819	-1	0.506245	-4.14236	-2.19833	0.247247	32.4416	4.22371e-07	1.26636e-06	3
ENSGACG00000013876			groupXI	13646453	13647149	-1	-2.82384	-4.35493	-3.54995	1.2831	31.952	5.35683e-07	1.60591e-06	3
ENSGACG00000001419	sagb	S-antigen; retina and pineal gland (arrestin) b [Source:ZFIN;Acc:ZDB-GENE-050913-98]	scaffold_186	134753	138182	1	0.492114	-5.11769	-3.34953	0.734427	31.864	5.59045e-07	1.67584e-06	3
ENSGACG00000017065	clul1	clusterin-like 1 (retinal) [Source:ZFIN;Acc:ZDB-GENE-031118-57]	groupIII	12784519	12788659	1	0.845119	-4.76607	-2.95911	0.881324	31.1237	8.00564e-07	2.39942e-06	3
ENSGACG00000001816	irg1	immunoresponsive gene 1 [Source:ZFIN;Acc:ZDB-GENE-081104-428]	groupXVI	2495273	2497944	-1	0.336609	-5.65885	3.70164	3.44012	30.8251	9.25258e-07	2.77298e-06	4
ENSGACG00000001310	agr2	anterior gradient homolog 2 (Xenopus laevis) [Source:ZFIN;Acc:ZDB-GENE-050417-214]	scaffold_130	216160	217339	-1	-6.86373	3.22442	-0.226379	-0.0584983	29.6033	1.67232e-06	5.01073e-06	5
ENSGACG00000002232	LCT (1 of 2)	lactase [Source:HGNC Symbol;Acc:HGNC:6530]	groupXVI	4650140	4660569	1	3.06632	-1.74701	1.1366	1.12162	28.9659	2.27669e-06	6.82076e-06	6
ENSGACG00000016903	rom1b	retinal outer segment membrane protein 1b [Source:ZFIN;Acc:ZDB-GENE-040426-1073]	groupIV	5039722	5043757	1	1.26658	-6.17247	-4.91736	0.604415	28.6865	2.60619e-06	7.80699e-06	3
ENSGACG00000014288	slc2a6	solute carrier family 2 (facilitated glucose transporter), member 6 [Source:ZFIN;Acc:ZDB-GENE-081104-301]	groupXI	14746039	14749506	1	0.099661	-5.29273	3.9423	1.23717	28.6258	2.68386e-06	8.03917e-06	4
ENSGACG00000016811	pde6a	phosphodiesterase 6A, cGMP-specific, rod, alpha [Source:ZFIN;Acc:ZDB-GENE-030616-42]	groupIV	4184397	4203182	-1	-0.377039	-4.53494	-2.0788	-0.0214801	28.0806	3.49332e-06	1.04632e-05	3
ENSGACG00000003971	si:dkey-65b12.6	si:dkey-65b12.6 [Source:ZFIN;Acc:ZDB-GENE-060526-329]	groupXX	2091662	2105365	1	-4.63214	3.67027	-0.752945	2.20469	27.6915	4.21592e-06	1.26253e-05	5
ENSGACG00000000325	EGR4 (1 of 2)	early growth response 4 [Source:HGNC Symbol;Acc:HGNC:3241]	scaffold_131	38860	39828	1	0.872195	-0.0449674	0.223568	3.50001	27.3181	5.04911e-06	1.51177e-05	7
ENSGACG00000019503	tyrp1a	tyrosinase-related protein 1a [Source:ZFIN;Acc:ZDB-GENE-070718-2]	groupVII	5570406	5574779	-1	1.95886	-1.81251	-0.668853	0.242272	27.1829	5.3897e-06	1.61356e-05	6
ENSGACG00000006419	mmp13b	matrix metalloproteinase 13b [Source:ZFIN;Acc:ZDB-GENE-030131-6152]	groupI	3154035	3156749	-1	-0.953434	3.73799	-3.15006	0.825006	27.1231	5.54773e-06	1.66077e-05	8
ENSGACG00000007705	gnat2	guanine nucleotide binding protein (G protein), alpha transducing activity polypeptide 2 [Source:ZFIN;Acc:ZDB-GENE-011128-10]	groupXII	10028631	10034853	1	0.391052	-4.01006	-1.79768	1.56202	26.7678	6.58545e-06	1.97119e-05	3
ENSGACG00000007600	lin37	lin-37 homolog (C. elegans) [Source:ZFIN;Acc:ZDB-GENE-050417-446]	groupXX	8907622	8910713	-1	0.627073	-0.89107	-0.192463	5.49724	26.7055	6.7864e-06	2.03122e-05	6
ENSGACG00000007397	atp2a1l	ATPase, Ca++ transporting, cardiac muscle, fast twitch 1 like [Source:ZFIN;Acc:ZDB-GENE-041229-2]	groupV	9492039	9501201	1	-2.84488	4.98012	-1.90075	2.59738	26.5333	7.37435e-06	2.20707e-05	8
ENSGACG00000010229	opn1sw2	opsin 1 (cone pigments), short-wave-sensitive 2 [Source:ZFIN;Acc:ZDB-GENE-990604-40]	groupXVII	10617436	10619138	1	1.53174	-5.00925	-3.84801	-0.0498135	26.4625	7.63077e-06	2.28354e-05	3
ENSGACG00000006256	gngt1	guanine nucleotide binding protein (G protein), gamma transducing activity polypeptide 1 [Source:ZFIN;Acc:ZDB-GENE-030131-7596]	groupX	8878295	8879183	-1	-0.0688387	-4.53174	-1.52419	1.63911	26.4006	7.86193e-06	2.35258e-05	3
ENSGACG00000009422	gnb3b	guanine nucleotide binding protein (G protein), beta polypeptide 3b [Source:ZFIN;Acc:ZDB-GENE-040426-2280]	groupX	14546539	14552132	-1	0.759663	-3.85785	-2.35934	0.5105	26.0159	9.46441e-06	2.83176e-05	3
ENSGACG00000015769	saga	S-antigen; retina and pineal gland (arrestin) a [Source:ZFIN;Acc:ZDB-GENE-040426-1538]	scaffold_135	49069	55745	-1	-2.03384	-5.04158	-0.355721	0.755576	25.9398	9.81816e-06	2.93726e-05	4
ENSGACG00000000705	gpr84	G protein-coupled receptor 84 [Source:ZFIN;Acc:ZDB-GENE-070928-33]	scaffold_27	1892715	1893911	1	0.267385	-6.59965	4.4483	0.985499	25.6059	1.15326e-05	3.44995e-05	4
ENSGACG00000012301	gnat1	guanine nucleotide binding protein (G protein), alpha transducing activity polypeptide 1 [Source:ZFIN;Acc:ZDB-GENE-011128-11]	groupXVII	14591379	14594859	-1	-0.388821	-5.41934	-2.22462	2.32602	25.4266	1.25729e-05	3.76093e-05	3
ENSGACG00000001490	sfi1	Sfi1 homolog, spindle assembly associated (yeast) [Source:ZFIN;Acc:ZDB-GENE-080206-4]	scaffold_27	4277151	4279348	1	0.333344	-0.353177	-0.660361	3.83064	25.4243	1.25871e-05	3.76496e-05	7
ENSGACG00000020277	rom1a	retinal outer segment membrane protein 1a [Source:ZFIN;Acc:ZDB-GENE-040426-1765]	groupVII	15434894	15438709	1	1.76879	-5.02359	-2.23278	0.377168	25.4211	1.26063e-05	3.77047e-05	3
ENSGACG00000002863			groupXII	809521	810585	-1	2.30329	-5.66794	-5.47482	3.58994	25.1953	1.40546e-05	4.20292e-05	3
ENSGACG00000014611	il1b	interleukin 1, beta [Source:ZFIN;Acc:ZDB-GENE-040702-2]	groupXIII	19421923	19423566	1	-0.0310608	-5.40091	3.09169	0.362813	25.1227	1.45545e-05	4.35215e-05	4
ENSGACG00000010287	opn1lw2	opsin 1 (cone pigments), long-wave-sensitive, 2 [Source:ZFIN;Acc:ZDB-GENE-040718-141]	groupXVII	10627091	10629553	1	1.12681	-4.51118	-4.02617	1.55852	25.0372	1.51661e-05	4.53477e-05	3
ENSGACG00000012174			groupXI	11252519	11253786	1	-1.88712	4.40033	-1.87406	0.73726	25.0021	1.54249e-05	4.61188e-05	8
ENSGACG00000005752	tph1a	tryptophan hydroxylase 1 (tryptophan 5-monooxygenase) a [Source:ZFIN;Acc:ZDB-GENE-030317-1]	groupXIX	7196791	7201894	1	-1.55193	-2.33828	0.182019	1.16534	24.657	1.82124e-05	5.44402e-05	9
ENSGACG00000012739	cldna	claudin a [Source:ZFIN;Acc:ZDB-GENE-010328-1]	groupI	16515331	16515954	-1	-5.39546	2.2425	-0.664844	0.381601	24.4729	1.98984e-05	5.94729e-05	5
ENSGACG00000014695	pdcb (2 of 2)	phosducin b [Source:ZFIN;Acc:ZDB-GENE-031023-2]	groupIII	5405267	5407603	1	-0.0295147	-4.63996	-3.51753	-0.472527	24.0581	2.4292e-05	7.25959e-05	3
ENSGACG00000008429			groupXIII	8449029	8455020	1	-4.68185	2.7529	-0.765618	2.40936	23.8765	2.65084e-05	7.92102e-05	5
ENSGACG00000012427	ckmb	creatine kinase, muscle b [Source:ZFIN;Acc:ZDB-GENE-040426-2128]	groupI	15913134	15919082	1	-3.13827	4.35986	-1.56542	2.05068	23.6076	3.01645e-05	9.01193e-05	8
ENSGACG00000007591	cabp5a	calcium binding protein 5a [Source:ZFIN;Acc:ZDB-GENE-040426-1655]	groupV	9619299	9621532	1	-0.216573	-3.15437	-0.713099	0.870526	23.3235	3.45743e-05	0.000103282	9
ENSGACG00000020231	MLXIPL	MLX interacting protein-like [Source:HGNC Symbol;Acc:HGNC:12744]	groupVII	14513150	14527273	1	0.800386	-1.11268	-1.60944	1.9399	23.2569	3.56977e-05	0.000106631	6
ENSGACG00000016445	cplx4a	complexin 4a [Source:ZFIN;Acc:ZDB-GENE-060526-116]	groupXIV	3902066	3906382	1	-1.38657	-4.5764	-2.55108	-0.623711	22.9392	4.15778e-05	0.000124181	3
ENSGACG00000014109	MUC5B (2 of 2)	mucin 5B, oligomeric mucus/gel-forming [Source:HGNC Symbol;Acc:HGNC:7516]	groupII	473043	478908	1	-6.51942	4.60211	-0.794882	0.235201	22.6572	4.76033e-05	0.000142152	5
ENSGACG00000005959	CKMT2 (2 of 2)	creatine kinase, mitochondrial 2 (sarcomeric) [Source:HGNC Symbol;Acc:HGNC:1996]	groupXIII	4441375	4446248	1	0.00104735	-4.09007	-1.68556	0.839248	22.608	4.87396e-05	0.000145537	3
ENSGACG00000002489	galm	galactose mutarotase [Source:ZFIN;Acc:ZDB-GENE-040718-66]	groupVI	792678	797452	1	0.526646	-0.0962398	0.144916	5.12005	22.3281	5.57402e-05	0.000166421	7
ENSGACG00000010476	fos	v-fos FBJ murine osteosarcoma viral oncogene homolog [Source:ZFIN;Acc:ZDB-GENE-031222-4]	groupXVIII	10338805	10341156	-1	0.770465	-0.0447918	0.206448	3.94186	22.2556	5.77113e-05	0.000172296	7
ENSGACG00000007162			groupXI	3854940	3856853	1	-0.130208	-4.42884	-3.54518	0.916641	22.0001	6.52295e-05	0.000194695	3
ENSGACG00000019431			groupVII	4596742	4598040	-1	-5.14327	1.49521	0.113446	0.348335	21.7375	7.3972e-05	0.000220763	5
ENSGACG00000014312	ccl-c5a	chemokine CCL-C5a [Source:ZFIN;Acc:ZDB-GENE-060526-181]	groupXIII	18785076	18787210	-1	0.720516	-2.73257	2.68186	2.44727	21.6137	7.84889e-05	0.00023423	2
ENSGACG00000020168	ckma	creatine kinase, muscle a [Source:ZFIN;Acc:ZDB-GENE-980526-109]	groupVII	12658666	12661721	1	-2.86329	4.66827	-1.52437	1.34785	21.5847	7.95848e-05	0.000237486	8
ENSGACG00000002791			groupVI	1439613	1448443	-1	-0.0692753	-3.89795	-1.94368	0.116866	21.5767	7.98915e-05	0.000238387	3
ENSGACG00000001729			scaffold_882	1249	3529	1	-0.106711	-3.80152	2.13528	-0.00893235	21.541	8.1269e-05	0.000242483	4
ENSGACG00000012473			groupXX	13875776	13876264	-1	0.221548	-3.97763	1.62952	-0.686077	21.4302	8.56956e-05	0.000255676	4
ENSGACG00000016359	esrp2	epithelial splicing regulatory protein 2 [Source:ZFIN;Acc:ZDB-GENE-030131-9824]	groupII	14972131	14987084	-1	-3.99049	2.52159	-0.764234	-1.03355	21.4201	8.61096e-05	0.000256896	5
ENSGACG00000014486	rcvrna	recoverin a [Source:ZFIN;Acc:ZDB-GENE-050913-106]	groupXI	15457704	15459096	-1	-2.82704	-5.99446	-0.643358	-0.263948	21.3338	8.97383e-05	0.00026769	4
ENSGACG00000001421	eef1db (1 of 2)	elongation factor-1, delta, b [Source:ZFIN;Acc:ZDB-GENE-030131-6544]	scaffold_1251	3157	5399	-1	1.67684	-0.538565	2.35811	0.331243	21.1787	9.66535e-05	0.000288284	6
ENSGACG00000017234			groupII	21372076	21380564	1	-2.30301	0.501757	-0.193937	-0.291964	21.1083	9.99642e-05	0.000298141	10
ENSGACG00000017311	pde6b	phosphodiesterase 6B, cGMP-specific, rod, beta [Source:ZFIN;Acc:ZDB-GENE-090421-2]	groupXIV	7319722	7327313	-1	-0.452466	-4.77081	-3.25678	-0.601517	21.0065	0.00010495	0.000312974	3
ENSGACG00000015788			scaffold_135	85407	88235	1	-0.168541	-3.35124	2.06243	1.76647	20.952	0.000107722	0.000321221	4
ENSGACG00000002632	epcam	epithelial cell adhesion molecule [Source:ZFIN;Acc:ZDB-GENE-040426-2209]	groupVI	1052768	1056426	1	-3.64979	1.69074	-0.40977	1.14013	20.9125	0.000109774	0.000327304	5
ENSGACG00000000187			scaffold_268	12981	13712	1	-3.8312	1.57825	1.61807	-0.622244	20.872	0.000111919	0.000333678	10
ENSGACG00000009620	ctsl.1	cathepsin L.1 [Source:ZFIN;Acc:ZDB-GENE-040718-61]	groupXV	7603276	7607758	1	-0.0119448	-2.61651	3.46498	2.94553	20.8664	0.000112222	0.00033456	2
ENSGACG00000004404	ppl	periplakin [Source:ZFIN;Acc:ZDB-GENE-041008-196]	groupXI	171394	186879	1	-3.25262	1.58501	-0.708269	1.3763	20.7252	0.000120058	0.000357903	5
ENSGACG00000017170			groupIV	5742527	5747140	-1	-0.689044	-4.23259	-2.45699	0.643786	20.6366	0.000125248	0.00037333	3
ENSGACG00000012383	DNAH2	dynein, axonemal, heavy chain 2 [Source:HGNC Symbol;Acc:HGNC:2948]	groupI	15831154	15878109	1	0.89634	0.860273	0.730555	3.37305	20.5744	0.000129026	0.000384567	7
ENSGACG00000020463	PCYOX1L	prenylcysteine oxidase 1 like [Source:HGNC Symbol;Acc:HGNC:28477]	groupVII	18979716	18986161	-1	1.1826	-0.650499	-1.23708	5.09399	20.4811	0.000134908	0.000402053	6
ENSGACG00000015342	egr2b	early growth response 2b [Source:ZFIN;Acc:ZDB-GENE-980526-283]	scaffold_48	1253749	1255511	-1	1.84996	0.350341	0.694518	0.227433	20.3008	0.00014704	0.000438054	6
ENSGACG00000006726	pde6c	phosphodiesterase 6C, cGMP-specific, cone, alpha prime [Source:ZFIN;Acc:ZDB-GENE-040426-1664]	groupV	8799194	8807124	1	0.325047	-3.89601	-1.01388	-0.425116	20.2874	0.000147983	0.000440837	3
ENSGACG00000014689			groupXI	15740446	15742572	1	-5.47579	2.50838	-0.581986	4.62927	20.1897	0.000155053	0.000461869	5
ENSGACG00000012977	tango2	transport and golgi organization 2 homolog (Drosophila) [Source:ZFIN;Acc:ZDB-GENE-040808-42]	groupXIII	15450020	15462773	-1	0.0094397	-0.737005	-0.265633	3.52492	19.981	0.000171289	0.000510115	7
ENSGACG00000000759	acox3	acyl-Coenzyme A oxidase 3, pristanoyl [Source:ZFIN;Acc:ZDB-GENE-040426-2163]	scaffold_47	344400	357377	1	0.317125	-0.678969	-0.580859	3.44415	19.9454	0.000174223	0.00051879	7
ENSGACG00000003787	krt5	keratin 5 [Source:ZFIN;Acc:ZDB-GENE-991110-23]	groupXII	2955937	2960693	-1	-5.08476	2.27205	-0.461299	5.15548	19.8845	0.000179357	0.000534046	5
ENSGACG00000000545	timeless	timeless homolog (Drosophila) [Source:ZFIN;Acc:ZDB-GENE-030131-8978]	scaffold_27	1143834	1158386	1	2.98652	-0.190387	-0.106832	3.02325	19.82	0.000184961	0.0005507	6
ENSGACG00000000971			scaffold_627	11418	11957	1	0.703071	3.33674	0.853321	1.96181	19.8193	0.000185025	0.00055086	8
ENSGACG00000015964	pde6h (1 of 2)	phosphodiesterase 6H, cGMP-specific, cone, gamma [Source:ZFIN;Acc:ZDB-GENE-040426-1754]	groupIX	580825	582033	1	1.34189	-4.56286	-2.92779	2.01158	19.76	0.000190338	0.000566643	3
ENSGACG00000007063	evplb	envoplakin b [Source:ZFIN;Acc:ZDB-GENE-030131-212]	groupXI	3754217	3763483	1	-1.70839	1.12782	-0.542328	1.3746	19.7021	0.000195663	0.000582392	10
ENSGACG00000019231	ccdc88aa	coiled-coil domain containing 88Aa [Source:ZFIN;Acc:ZDB-GENE-100701-2]	groupIX	16073061	16085439	1	-0.187699	0.61892	0.161524	6.3448	19.6975	0.000196091	0.000583632	11
ENSGACG00000004618	si:dkey-17e16.9 (1 of 2)	si:dkey-17e16.9 [Source:ZFIN;Acc:ZDB-GENE-091118-123]	groupXVIII	1227899	1240293	1	-1.08841	3.59091	1.14833	-0.676253	19.6949	0.000196334	0.000584322	8
ENSGACG00000006820			groupVIII	7382329	7385332	1	-0.777657	-2.59756	-1.2837	-0.28606	19.6281	0.000202689	0.000603199	9
ENSGACG00000006908			groupI	4256610	4274453	1	-5.29309	2.13382	-0.499181	4.85342	19.3946	0.000226557	0.000674073	5
ENSGACG00000001703	pax7b	paired box gene 7b [Source:ZFIN;Acc:ZDB-GENE-080917-54]	scaffold_27	5048747	5088359	-1	1.91426	-0.716061	4.81162	-1.38042	19.3022	0.000236747	0.000704265	2
ENSGACG00000015114	CDH26	cadherin 26 [Source:HGNC Symbol;Acc:HGNC:15902]	scaffold_68	432442	435814	-1	-4.54041	2.71679	-0.802618	-1.58966	19.2374	0.000244175	0.000726277	5
ENSGACG00000008706	zgc:91999	zgc:91999 [Source:ZFIN;Acc:ZDB-GENE-040801-241]	groupV	10785152	10788629	1	-1.01484	-0.460782	-0.0538884	2.59582	19.1352	0.000256353	0.000762454	7
ENSGACG00000012562			groupXII	16530362	16547407	-1	-4.76009	0.798139	1.61673	-0.417197	19.0484	0.000267166	0.000794473	1
ENSGACG00000002955			groupXIX	2513168	2523323	1	-1.1587	3.4857	-0.20605	-0.161603	19.0469	0.000267366	0.000795022	8
ENSGACG00000017671			groupIV	8344802	8357245	-1	-0.826521	-1.14943	0.183388	2.34141	19.0096	0.000272152	0.000809206	9
ENSGACG00000000314	cnga1	cyclic nucleotide gated channel alpha 1 [Source:ZFIN;Acc:ZDB-GENE-110408-39]	scaffold_131	15870	20132	-1	-0.0426561	-2.96186	-0.975662	-0.50091	18.947	0.00028038	0.000833621	9
ENSGACG00000000363	oclna	occludin a [Source:ZFIN;Acc:ZDB-GENE-040426-2685]	scaffold_168	103138	108449	1	-4.38017	1.40924	-0.780249	-0.872836	18.8373	0.000295418	0.000878229	5
ENSGACG00000017777			groupIII	15939271	15942457	-1	-4.69246	1.89034	0.0473417	-0.253264	18.8245	0.00029722	0.000883483	5
ENSGACG00000018652	IL4I1 (2 of 2)	interleukin 4 induced 1 [Source:HGNC Symbol;Acc:HGNC:19094]	groupVII	494053	497077	1	-0.44153	-4.0399	3.64482	2.23418	18.7492	0.00030806	0.000915651	2
ENSGACG00000020446	arr3a	arrestin 3a, retinal (X-arrestin) [Source:ZFIN;Acc:ZDB-GENE-040718-102]	groupVII	18670294	18676401	-1	-0.566874	-4.37443	-2.87003	1.54048	18.7424	0.000309057	0.000918561	3
ENSGACG00000001678			scaffold_213	11977	14125	-1	0.315127	0.60146	0.595494	4.26853	18.707	0.000314308	0.000934056	7
ENSGACG00000002084			scaffold_56	892868	900239	-1	-3.84862	2.20762	0.227707	-0.18413	18.6582	0.000321692	0.000955943	5
ENSGACG00000018108	zgc:92061	zgc:92061 [Source:ZFIN;Acc:ZDB-GENE-040718-78]	groupIX	10019261	10022541	-1	-4.2269	1.90599	-0.256444	3.38127	18.5948	0.000331538	0.000985145	5
ENSGACG00000017610			groupIX	8455613	8456757	1	0.509819	0.21587	-0.116793	3.95778	18.571	0.000335315	0.000996309	7
ENSGACG00000004130	scinla	scinderin like a [Source:ZFIN;Acc:ZDB-GENE-030131-2005]	groupVIII	2316006	2323164	-1	-3.86483	1.24141	-0.38219	1.83257	18.5241	0.000342872	0.00101864	5
ENSGACG00000018922			groupVII	1723958	1731123	-1	-4.59668	2.99522	-0.913565	-1.0571	18.5079	0.000345534	0.00102649	5
ENSGACG00000003965	ESYT2 (1 of 2)	extended synaptotagmin-like protein 2 [Source:HGNC Symbol;Acc:HGNC:22211]	groupXXI	9244795	9263251	-1	-0.0973986	-0.497782	0.0140236	4.49561	18.5055	0.00034592	0.00102758	7
ENSGACG00000013141	atp2a1	ATPase, Ca++ transporting, cardiac muscle, fast twitch 1 [Source:ZFIN;Acc:ZDB-GENE-020905-1]	groupXI	12754742	12769556	-1	-1.72215	2.85658	-0.272967	2.65097	18.3733	0.000368361	0.00109411	8
ENSGACG00000009696	CIDEC	cell death-inducing DFFA-like effector c [Source:HGNC Symbol;Acc:HGNC:24229]	groupXVII	9849698	9852173	1	0.367511	-0.653814	1.01771	2.63948	18.3603	0.000370654	0.00110086	12
ENSGACG00000011673	elf3	E74-like factor 3 (ets domain transcription factor, epithelial-specific ) [Source:ZFIN;Acc:ZDB-GENE-030131-8760]	groupXVII	13179867	13183311	-1	-3.88325	1.35271	-0.0248169	-0.712673	18.2513	0.000390363	0.00115926	5
ENSGACG00000008352	FER1L6	fer-1-like family member 6 [Source:HGNC Symbol;Acc:HGNC:28065]	groupXVI	16508075	16523530	-1	-3.05019	1.40548	-0.153964	-0.351519	18.2349	0.000393405	0.00116816	5
ENSGACG00000003228	stxbp1b	syntaxin binding protein 1b [Source:ZFIN;Acc:ZDB-GENE-060531-166]	groupXIII	11028	33824	1	0.394959	-4.35428	0.431329	0.401087	18.2201	0.000396193	0.00117636	4
ENSGACG00000003412	gngt2b	guanine nucleotide binding protein (G protein), gamma transducing activity polypeptide 2b [Source:ZFIN;Acc:ZDB-GENE-091020-4]	groupV	3481760	3482745	-1	0.959906	-4.13807	-3.50284	0.0785368	18.1768	0.000404415	0.00120064	3
ENSGACG00000018001			groupIX	9417461	9494931	-1	-3.22787	1.21296	-0.540202	0.0245067	18.1067	0.000418107	0.00124114	5
ENSGACG00000006358	grn2	granulin 2 [Source:ZFIN;Acc:ZDB-GENE-050522-264]	groupX	9062709	9064969	1	-0.561394	-2.12031	2.83655	2.04891	18.024	0.000434855	0.0012907	2
ENSGACG00000011954	vgll4l	vestigial like 4 like [Source:ZFIN;Acc:ZDB-GENE-070112-1682]	groupXIII	13415649	13419278	-1	-3.26811	1.88688	-0.771413	-1.281	18.0056	0.000438675	0.00130196	5
ENSGACG00000006569	oxt	oxytocin [Source:ZFIN;Acc:ZDB-GENE-030407-1]	groupXIII	5131577	5133164	1	0.430477	-2.81602	4.15863	5.45628	17.9729	0.000445555	0.00132215	2
ENSGACG00000001493			scaffold_27	4279624	4281366	1	0.289909	-0.393284	-0.476775	3.67054	17.9681	0.000446567	0.00132508	7
ENSGACG00000020661	tmem45b	transmembrane protein 45B [Source:ZFIN;Acc:ZDB-GENE-040426-1904]	groupVII	22064785	22067010	1	-4.79911	-0.899443	2.84488	-1.00613	17.7856	0.000486987	0.00144459	1
ENSGACG00000007435	pdcb (1 of 2)	phosducin b [Source:ZFIN;Acc:ZDB-GENE-031023-2]	groupVIII	8465078	8467677	1	0.208023	-3.90479	-1.82458	-0.94356	17.7837	0.000487418	0.00144578	3
ENSGACG00000009501	grhl3	grainyhead-like 3 [Source:ZFIN;Acc:ZDB-GENE-030131-9854]	groupXV	7400568	7405671	1	-3.2903	1.65219	-0.704294	-1.13416	17.7128	0.00050409	0.00149515	5
ENSGACG00000015437			groupXIV	44966	46150	-1	0.627167	-1.95855	4.35143	-0.239006	17.6953	0.000508309	0.00150757	2
ENSGACG00000019176	pfkfb3	6-phosphofructo-2-kinase/fructose-2,6-biphosphatase 3 [Source:ZFIN;Acc:ZDB-GENE-040426-2724]	groupIV	22147684	22153447	1	-0.22739	-0.286635	1.4299	2.61195	17.6839	0.000511063	0.00151565	12
ENSGACG00000004882	IMPA1 (2 of 3)	inositol(myo)-1(or 4)-monophosphatase 1 [Source:HGNC Symbol;Acc:HGNC:6050]	groupXXI	10624323	10627058	-1	-2.66441	1.12633	-0.40896	-0.364834	17.6773	0.000512671	0.00152033	10
ENSGACG00000010211	guk1b	guanylate kinase 1b [Source:ZFIN;Acc:ZDB-GENE-020916-1]	groupVIII	12928094	12932946	-1	-0.158139	-4.2167	-1.51325	0.293579	17.6765	0.000512859	0.0015208	3
ENSGACG00000010514	si:ch73-261i21.5	si:ch73-261i21.5 [Source:ZFIN;Acc:ZDB-GENE-110411-258]	groupI	10981250	10983032	-1	-7.08356	-0.706922	4.33179	-0.947964	17.6507	0.000519174	0.00153944	1
ENSGACG00000007248	nmnat1	nicotinamide nucleotide adenylyltransferase 1 [Source:ZFIN;Acc:ZDB-GENE-050417-101]	groupXII	9463517	9469423	-1	-2.02363	0.906841	-0.267451	1.94486	17.6002	0.000531748	0.00157663	10
ENSGACG00000002990			groupXII	1180141	1181902	-1	-1.51586	-1.41381	0.723603	0.765364	17.5552	0.000543227	0.00161057	9
ENSGACG00000001578	si:dkey-61m24.1	si:dkey-61m24.1 [Source:ZFIN;Acc:ZDB-GENE-040724-47]	scaffold_904	2771	4632	1	-0.389682	1.6025	0.960084	-0.0376089	17.5398	0.000547209	0.00162228	8
ENSGACG00000002068			groupXIX	428034	429135	-1	0.547849	5.04437	0.864311	-0.598803	17.5273	0.000550459	0.00163182	8
ENSGACG00000005131	b4galnt2.2	beta-1,4-N-acetyl-galactosaminyl transferase 2, tandem duplicate 2 [Source:ZFIN;Acc:ZDB-GENE-130530-731]	groupXI	798847	806198	1	-4.49746	1.61005	-0.668514	-0.137137	17.4102	0.000581894	0.0017246	5
ENSGACG00000009963	ebi3	Epstein-Barr virus induced gene 3 [Source:ZFIN;Acc:ZDB-GENE-070912-615]	groupXV	8204513	8206803	1	-0.136456	-3.50993	1.40312	0.262853	17.376	0.000591412	0.00175271	4
ENSGACG00000004797	padi2	peptidyl arginine deiminase, type II [Source:ZFIN;Acc:ZDB-GENE-031116-67]	groupXVII	2797661	2805248	1	-0.565258	0.631194	0.408499	3.50398	17.3667	0.000594035	0.00176038	11
ENSGACG00000018033	arl3l2	ADP-ribosylation factor-like 3, like 2 [Source:ZFIN;Acc:ZDB-GENE-040426-1678]	groupIV	11017480	11020806	-1	-1.02281	-4.063	-1.23818	-0.871488	17.3421	0.000601002	0.00178092	4
ENSGACG00000002895			groupX	3231202	3235847	-1	-5.18743	1.19457	0.0772455	-0.750461	17.3125	0.000609483	0.00180595	5
ENSGACG00000014432	pde6g	phosphodiesterase 6G, cGMP-specific, rod, gamma [Source:ZFIN;Acc:ZDB-GENE-030904-1]	scaffold_112	198492	200652	-1	-1.16964	-4.76895	-0.496994	1.35676	17.2967	0.000614052	0.00181938	4
ENSGACG00000019260	evpla	envoplakin a [Source:ZFIN;Acc:ZDB-GENE-030829-19]	groupIX	16159871	16170192	1	-2.2137	1.06982	-0.558999	0.866864	17.1888	0.000646269	0.00191439	10
ENSGACG00000013729	cnga3a	cyclic nucleotide gated channel alpha 3a [Source:ZFIN;Acc:ZDB-GENE-090611-2]	groupVIII	17753698	17760795	1	0.775218	-1.0843	-0.128111	3.86982	17.1744	0.000650703	0.00192718	6
ENSGACG00000010251	SUCNR1	succinate receptor 1 [Source:HGNC Symbol;Acc:HGNC:4542]	groupI	10382050	10383467	-1	-0.373212	-3.43238	4.51998	-1.92562	17.1132	0.000669863	0.00198346	2
ENSGACG00000005449			groupXXI	11300455	11304049	-1	-0.92753	-2.06273	1.67849	1.86595	17.0522	0.000689492	0.00204135	9
ENSGACG00000008609	tysnd1	trypsin domain containing 1 [Source:ZFIN;Acc:ZDB-GENE-030131-8525]	groupVI	9844742	9847517	-1	-0.106486	-1.01403	0.678069	3.15923	16.8294	0.000766203	0.00226793	12
ENSGACG00000002143			groupX	1557471	1561810	-1	-2.57724	1.94147	-1.81418	4.18028	16.8158	0.000771126	0.00228237	8
ENSGACG00000001459	zgc:56585 (2 of 3)	zgc:56585 [Source:ZFIN;Acc:ZDB-GENE-040426-1084]	scaffold_273	18896	22052	-1	0.945232	-0.333942	-0.354861	1.66424	16.7303	0.000802986	0.00237639	6
ENSGACG00000011827	cebpb	CCAAT/enhancer binding protein (C/EBP), beta [Source:ZFIN;Acc:ZDB-GENE-020111-3]	groupXII	15595557	15596471	1	-0.449824	-1.81532	1.43591	1.83551	16.6543	0.000832368	0.00246276	9
ENSGACG00000012712	SPHK1 (1 of 2)	sphingosine kinase 1 [Source:HGNC Symbol;Acc:HGNC:11240]	scaffold_151	127833	131299	-1	0.36149	-2.39241	0.733214	-0.74817	16.6311	0.000841583	0.00248988	9
ENSGACG00000015763			scaffold_135	8651	19562	-1	0.170201	2.53423	0.804105	-0.396856	16.6282	0.000842721	0.00249296	8
ENSGACG00000020320	cldn7b	claudin 7b [Source:ZFIN;Acc:ZDB-GENE-001103-5]	groupVII	16901341	16905118	-1	-1.53288	0.724006	-0.0625371	1.25831	16.6023	0.00085311	0.0025234	10
ENSGACG00000008019	syt5b	synaptotagmin Vb [Source:ZFIN;Acc:ZDB-GENE-050522-134]	groupV	9906473	9910321	-1	-0.13683	-2.19652	0.340189	0.623217	16.5398	0.000878692	0.00259876	9
ENSGACG00000001398	RHO (1 of 2)	rhodopsin [Source:HGNC Symbol;Acc:HGNC:10012]	scaffold_27	4146139	4148235	-1	1.41845	-4.39228	-3.97467	1.40442	16.4082	0.000935131	0.00276487	3
ENSGACG00000015912	tyrp1b	tyrosinase-related protein 1b [Source:ZFIN;Acc:ZDB-GENE-040718-249]	groupIX	263920	268621	-1	1.28536	-2.13963	-0.738352	-0.33515	16.3856	0.000945144	0.00279415	6
ENSGACG00000018719	si:dkey-16m19.1	si:dkey-16m19.1 [Source:ZFIN;Acc:ZDB-GENE-030131-7281]	groupIX	14144403	14147044	1	-2.32966	1.74357	0.633492	-1.34688	16.3037	0.000982474	0.00290383	10
ENSGACG00000000716	opn1sw1	opsin 1 (cone pigments), short-wave-sensitive 1 [Source:ZFIN;Acc:ZDB-GENE-991109-25]	scaffold_90	461069	462906	1	1.47682	-4.11185	-4.66042	-0.9742	16.2789	0.00099404	0.00293784	3
ENSGACG00000019252	si:ch73-111e15.1	si:ch73-111e15.1 [Source:ZFIN;Acc:ZDB-GENE-110411-28]	groupIX	16121524	16124104	-1	0.948542	-3.37132	2.23739	1.22034	16.2739	0.00099639	0.00294462	2
ENSGACG00000006393	pkmb	pyruvate kinase, muscle, b [Source:ZFIN;Acc:ZDB-GENE-040801-230]	groupXIX	7699117	7705618	-1	-2.95624	3.02335	-1.22916	-0.761259	16.2382	0.00101331	0.00299427	8
ENSGACG00000017329	rbp4l	retinol binding protein 4, like [Source:ZFIN;Acc:ZDB-GENE-030131-7591]	groupXIV	7331177	7333523	1	-1.3603	-4.21268	-0.887768	2.50104	16.1093	0.00107696	0.00318161	4
ENSGACG00000011569	TRPM6	transient receptor potential cation channel, subfamily M, member 6 [Source:HGNC Symbol;Acc:HGNC:17995]	groupXIII	13116394	13129794	-1	0.285081	0.536874	-0.483002	3.53574	16.1077	0.00107777	0.0031838	11
ENSGACG00000003339	IGFN1 (1 of 5)	immunoglobulin-like and fibronectin type III domain containing 1 [Source:HGNC Symbol;Acc:HGNC:24607]	groupXII	1940635	1947412	1	-2.88159	5.34952	-1.0002	-1.34603	16.1063	0.00107848	0.00318573	8
ENSGACG00000002554	zfpm1	zinc finger protein, multitype 1 [Source:ZFIN;Acc:ZDB-GENE-050419-238]	groupXIX	1681785	1687169	1	0.550893	0.206926	-0.655634	2.65357	16.0764	0.00109381	0.00323083	7
ENSGACG00000003217			groupXX	559381	568019	1	-3.06379	0.944314	-0.369946	0.0624431	16.0498	0.00110766	0.00327153	5
ENSGACG00000001611	FAM132B	family with sequence similarity 132, member B [Source:HGNC Symbol;Acc:HGNC:26727]	scaffold_120	164636	167247	1	0.10208	-1.55413	0.256208	1.36595	16.0256	0.00112038	0.00330852	9
ENSGACG00000008327	snx10b	sorting nexin 10b [Source:ZFIN;Acc:ZDB-GENE-070628-1]	groupXX	9752838	9753601	-1	-0.231888	-2.47785	3.14492	1.61412	15.9957	0.00113628	0.00335508	2
ENSGACG00000017359			groupXIV	7422416	7423357	-1	-0.488761	-2.70285	2.7068	0.114286	15.9815	0.00114395	0.00337755	2
ENSGACG00000011698	TP53I3	tumor protein p53 inducible protein 3 [Source:HGNC Symbol;Acc:HGNC:19373]	groupXV	11478567	11482605	1	0.0461215	-1.81908	1.1753	3.4051	15.9702	0.00115004	0.00339531	9
ENSGACG00000005450	scn1a	sodium channel, voltage-gated, type I, alpha [Source:ZFIN;Acc:ZDB-GENE-040426-751]	groupXVI	10666686	10681782	-1	2.92067	-0.778822	0.467332	0.0821343	15.9668	0.00115191	0.00340065	6
ENSGACG00000004900	irbp	interphotoreceptor retinoid-binding protein [Source:ZFIN;Acc:ZDB-GENE-990415-132]	groupV	5925725	5929372	1	0.239027	-2.76866	-3.49763	0.252568	15.937	0.00116822	0.00344839	3
ENSGACG00000016824	fat2	FAT tumor suppressor homolog 2 (Drosophila) [Source:ZFIN;Acc:ZDB-GENE-111031-1]	groupIV	4393867	4436529	1	-0.68876	0.290174	2.43533	1.31405	15.8636	0.00120938	0.00356927	2
ENSGACG00000014002	RS1 (1 of 2)	retinoschisin 1 [Source:HGNC Symbol;Acc:HGNC:10457]	groupVIII	18201928	18205258	-1	-0.572145	-4.31504	-0.450585	-0.611252	15.8541	0.00121484	0.00358497	4
ENSGACG00000005789			groupX	8269260	8270252	-1	0.636836	0.0619647	0.253071	3.25727	15.8076	0.00124179	0.00366384	7
ENSGACG00000009762			groupX	15033533	15042028	1	0.943655	-0.584996	0.953787	0.269079	15.7255	0.00129077	0.00380793	12
ENSGACG00000009833	RING1	ring finger protein 1 [Source:HGNC Symbol;Acc:HGNC:10018]	groupX	15063627	15068329	-1	0.28684	-0.22814	0.187296	5.55972	15.6977	0.00130784	0.00385806	7
ENSGACG00000002454	tmx3	thioredoxin-related transmembrane protein 3 [Source:ZFIN;Acc:ZDB-GENE-050522-396]	scaffold_161	29932	42589	1	0.441039	-2.28901	0.465143	0.0101492	15.6881	0.00131377	0.00387531	9
ENSGACG00000017360	CD274	CD274 molecule [Source:HGNC Symbol;Acc:HGNC:17635]	groupXIV	7425305	7428114	-1	-0.88223	-2.68531	3.00296	-0.34994	15.6346	0.00134734	0.00397342	2
ENSGACG00000007851			groupVI	9193459	9197329	-1	-2.58813	0.845754	-0.061537	-0.470487	15.506	0.00143156	0.00422055	10
ENSGACG00000018003			groupIII	16775135	16784646	1	-0.147383	4.10012	-0.343499	-1.35414	15.4902	0.00144225	0.00425183	8
ENSGACG00000006160			groupI	2698988	2699903	-1	-4.36077	1.03822	0.376297	-0.467546	15.4682	0.00145725	0.00429555	5
ENSGACG00000002054	si:ch211-53m15.2	si:ch211-53m15.2 [Source:ZFIN;Acc:ZDB-GENE-100922-24]	scaffold_250	28530	63337	-1	0.38053	-1.4095	1.64314	-0.446193	15.441	0.00147605	0.0043507	12
ENSGACG00000015528			groupIII	8423158	8424352	-1	-0.420222	-2.71575	1.53003	0.169452	15.3972	0.00150681	0.00444059	4
ENSGACG00000018106	glulc	glutamate-ammonia ligase (glutamine synthase) c [Source:ZFIN;Acc:ZDB-GENE-060929-540]	groupXIV	11265128	11270449	-1	-2.39977	0.98365	0.0380555	-0.288191	15.3603	0.00153324	0.00451821	10
ENSGACG00000006711			groupXV	2986778	2987060	1	0.665205	-2.09068	0.92624	0.921053	15.34	0.00154796	0.00456135	9
ENSGACG00000012690	TSTA3 (2 of 2)	tissue specific transplantation antigen P35B [Source:HGNC Symbol;Acc:HGNC:12390]	groupXI	12203036	12211914	-1	-3.31114	1.7255	0.0150602	-1.05382	15.3286	0.0015563	0.00458565	5
ENSGACG00000007727	ALDOA (2 of 2)	aldolase A, fructose-bisphosphate [Source:HGNC Symbol;Acc:HGNC:414]	groupV	9673592	9680896	-1	-1.50187	2.25207	-0.882965	2.22346	15.307	0.00157224	0.00463208	8
ENSGACG00000018310	krt15	keratin 15 [Source:ZFIN;Acc:ZDB-GENE-040426-2931]	groupIX	10936813	10942851	-1	-2.0188	-0.640878	-0.800402	4.23612	15.2722	0.00159823	0.0047081	9
ENSGACG00000019826	C3 (8 of 8)	complement component 3 [Source:HGNC Symbol;Acc:HGNC:1318]	groupIX	19651307	19670618	1	1.21658	-1.9738	0.0814577	3.60706	15.1504	0.00169253	0.0049856	6
ENSGACG00000012557	OVGP1 (4 of 4)	oviductal glycoprotein 1, 120kDa [Source:HGNC Symbol;Acc:HGNC:8524]	groupXII	16510869	16515882	-1	-3.78553	0.564505	-1.58471	-0.0211336	15.1235	0.0017141	0.00504765	5
ENSGACG00000019948	chrm2a	cholinergic receptor, muscarinic 2a [Source:ZFIN;Acc:ZDB-GENE-030314-1]	groupIV	31170519	31172044	-1	-0.119359	0.481679	-0.215348	5.54714	15.0961	0.00173637	0.00511264	11
ENSGACG00000012455	DHPS (1 of 2)	deoxyhypusine synthase [Source:HGNC Symbol;Acc:HGNC:2869]	groupXI	11660812	11665052	1	-2.19619	1.06889	0.286139	-0.25775	15.077	0.001752	0.00515808	10
ENSGACG00000018442	GPR151	G protein-coupled receptor 151 [Source:HGNC Symbol;Acc:HGNC:23624]	groupIV	14023862	14025085	1	-2.30671	-1.53817	0.970146	0.861305	15.0293	0.00179179	0.00527492	9
ENSGACG00000020178	crx	cone-rod homeobox [Source:ZFIN;Acc:ZDB-GENE-010403-1]	groupVII	12798591	12800846	1	-0.289951	-2.59006	-0.146285	-0.714125	15.0224	0.0017976	0.0052917	9
ENSGACG00000006793	gadd45g	growth arrest and DNA-damage-inducible, gamma [Source:ZFIN;Acc:ZDB-GENE-040426-1882]	groupXIII	5635194	5636935	-1	-0.518045	-0.159342	0.561583	4.13775	15.0165	0.0018026	0.00530612	7
ENSGACG00000017900	CNGA1 (2 of 2)	cyclic nucleotide gated channel alpha 1 [Source:HGNC Symbol;Acc:HGNC:2148]	groupIX	8868125	8871488	1	-0.614581	-5.28009	-0.990136	-0.673192	15.0095	0.00180855	0.00532331	4
ENSGACG00000018145	barhl1b	BarH-like 1b [Source:ZFIN;Acc:ZDB-GENE-060118-2]	groupXIV	11471663	11476209	-1	2.30995	-0.322095	4.73198	-1.61419	15.0007	0.00181606	0.0053448	2
ENSGACG00000019761	capn9	calpain 9 [Source:ZFIN;Acc:ZDB-GENE-010724-2]	groupIX	19327853	19335074	-1	-3.63493	1.572	-0.424928	-0.0246482	14.9234	0.00188332	0.00554049	5
ENSGACG00000009369	tmprss13a	transmembrane protease, serine 13a [Source:ZFIN;Acc:ZDB-GENE-090309-3]	groupI	8959411	8964674	1	-2.50531	1.64219	0.73482	-1.64895	14.8992	0.00190487	0.00560325	10
ENSGACG00000016413	pstpip1b	proline-serine-threonine phosphatase interacting protein 1b [Source:ZFIN;Acc:ZDB-GENE-051127-25]	groupII	15242814	15247792	1	-0.255778	-2.07285	2.09196	1.12596	14.8616	0.00193886	0.00570256	9
ENSGACG00000009825	si:ch211-154o6.6	si:ch211-154o6.6 [Source:ZFIN;Acc:ZDB-GENE-060503-576]	groupXX	11526901	11530777	-1	-0.234778	-1.06171	0.562146	4.02459	14.8488	0.00195051	0.00573615	12
ENSGACG00000004815			groupXV	957609	958739	-1	1.57603	-0.421918	-0.247764	2.03224	14.806	0.00199018	0.00585248	6
ENSGACG00000002787	inaa	internexin neuronal intermediate filament protein, alpha a [Source:ZFIN;Acc:ZDB-GENE-060531-65]	groupVI	1434642	1438648	-1	0.0389772	-3.88157	-1.84209	-0.332308	14.7934	0.00200195	0.00588673	3
ENSGACG00000002480	SLC18A3 (1 of 2)	solute carrier family 18 (vesicular acetylcholine transporter), member 3 [Source:HGNC Symbol;Acc:HGNC:10936]	groupV	1049043	1050542	1	-2.14788	-1.35583	1.49607	0.539347	14.7918	0.00200353	0.00589105	9
ENSGACG00000016293	col17a1a	collagen, type XVII, alpha 1a [Source:ZFIN;Acc:ZDB-GENE-090313-107]	groupIX	2327057	2339020	1	-2.64699	0.957268	-0.724302	-0.724211	14.6725	0.00211906	0.00622894	10
ENSGACG00000017831			groupIII	16076418	16079556	-1	0.366516	-0.751245	0.126167	1.22784	14.5822	0.00221087	0.00649692	7
ENSGACG00000013984	snrnp25	small nuclear ribonucleoprotein 25 [Source:ZFIN;Acc:ZDB-GENE-050417-179]	groupXI	13720527	13721620	1	0.039876	-0.449636	-0.387658	2.7788	14.4842	0.00231499	0.0068013	7
ENSGACG00000002457	cyb5r2	cytochrome b5 reductase 2 [Source:ZFIN;Acc:ZDB-GENE-060825-83]	groupXIX	1262591	1267022	-1	-0.384917	-0.853512	0.88371	0.673112	14.4576	0.00234409	0.0068864	12
ENSGACG00000014752			groupI	22723990	22724814	1	-2.30128	3.76171	-0.396851	-0.931229	14.4068	0.00240056	0.00705148	8
ENSGACG00000000085	rpa3	replication protein A3 [Source:ZFIN;Acc:ZDB-GENE-040426-977]	scaffold_58	498185	499671	1	0.652383	-0.461364	-0.340478	4.73807	14.3806	0.0024303	0.007138	6
ENSGACG00000019899	srd5a2b	steroid-5-alpha-reductase, alpha polypeptide 2b [Source:ZFIN;Acc:ZDB-GENE-050417-182]	groupIX	19958905	19962337	-1	-0.884873	-0.507445	-0.342068	2.94302	14.3492	0.00246633	0.00724342	7
ENSGACG00000017039	prom1b	prominin 1 b [Source:ZFIN;Acc:ZDB-GENE-031003-1]	groupIX	6017779	6033654	1	-0.181827	-2.86553	-0.371586	-0.729381	14.3258	0.00249356	0.0073221	9
ENSGACG00000013171	otud7b	OTU domain containing 7B [Source:ZFIN;Acc:ZDB-GENE-060616-1]	groupXX	15718618	15727964	1	-0.385835	0.426175	0.733464	2.14896	14.2773	0.00255102	0.00748953	11
ENSGACG00000019649	cdca9	cell division cycle associated 9 [Source:ZFIN;Acc:ZDB-GENE-090706-4]	groupVII	6895937	6897883	-1	-1.89254	0.76915	-0.534477	3.06511	14.2347	0.00260243	0.00763824	10
ENSGACG00000018941	si:ch211-202h22.9	si:ch211-202h22.9 [Source:ZFIN;Acc:ZDB-GENE-030131-1143]	groupIX	14920278	14922777	-1	-2.40173	1.29388	-0.303337	-1.50695	14.2076	0.00263581	0.00773577	10
ENSGACG00000012423	lsr	lipolysis stimulated lipoprotein receptor [Source:ZFIN;Acc:ZDB-GENE-050913-73]	groupXX	13643753	13652239	1	-2.86672	1.47327	-0.325097	-1.19504	14.1493	0.00270881	0.00794816	5
ENSGACG00000014114	ANO9 (2 of 2)	anoctamin 9 [Source:HGNC Symbol;Acc:HGNC:20679]	groupII	482933	501158	-1	-3.30968	1.53944	-0.368454	-1.20407	14.0912	0.00278366	0.00816686	5
ENSGACG00000013904	tal2	T-cell acute lymphocytic leukemia 2 [Source:ZFIN;Acc:ZDB-GENE-040115-1]	groupXIII	17446664	17448343	-1	1.17648	-0.179036	3.51293	-0.994333	14.0814	0.00279639	0.00820371	2
ENSGACG00000019432			groupVII	4603618	4642267	-1	-3.04389	1.2114	-0.0603582	-0.135576	13.9408	0.00298686	0.00875946	5
ENSGACG00000006376	desma	desmin a [Source:ZFIN;Acc:ZDB-GENE-980526-221]	groupXVI	12208794	12214806	-1	-1.19923	1.98933	0.67943	-0.131749	13.9277	0.00300523	0.0088128	8
ENSGACG00000011331			groupXII	15121756	15124352	1	-4.52233	0.418195	2.77309	-2.39695	13.9081	0.00303297	0.00889364	1
ENSGACG00000011884	MSRB1 (2 of 2)	methionine sulfoxide reductase B1 [Source:HGNC Symbol;Acc:HGNC:14133]	groupXI	10897156	10899020	-1	0.202406	-0.695689	0.019455	2.35823	13.9022	0.00304127	0.00891696	7
ENSGACG00000011748			groupXVII	13592528	13625997	1	-0.021874	0.478241	0.0933242	5.16854	13.8895	0.00305953	0.00896996	11
ENSGACG00000003007	cyp1b1	cytochrome P450, family 1, subfamily B, polypeptide 1 [Source:ZFIN;Acc:ZDB-GENE-030902-1]	groupVI	2417129	2420132	-1	-0.775534	-0.349127	0.331357	1.07058	13.8805	0.00307245	0.00900733	7
ENSGACG00000006476	abca12	ATP-binding cassette, sub-family A (ABC1), member 12 [Source:ZFIN;Acc:ZDB-GENE-030131-9790]	groupXVI	12290488	12318696	1	-0.962961	0.61841	-0.152557	1.19273	13.8616	0.00309967	0.00908658	10
ENSGACG00000013266	gpx4a (1 of 3)	glutathione peroxidase 4a [Source:ZFIN;Acc:ZDB-GENE-030410-2]	groupVIII	17193571	17195072	1	1.28073	-0.683175	-0.00532919	0.435631	13.845	0.00312387	0.009157	6
ENSGACG00000000631	atp8b1	ATPase, aminophospholipid transporter, class I, type 8B, member 1 [Source:ZFIN;Acc:ZDB-GENE-091116-14]	scaffold_88	405761	423134	-1	-2.29104	1.33691	-0.483848	-0.173217	13.7995	0.0031911	0.00935354	10
ENSGACG00000016771	MTFP1	mitochondrial fission process 1 [Source:HGNC Symbol;Acc:HGNC:26945]	groupXIV	5573576	5576033	1	0.0479124	-0.286549	-1.03028	2.90318	13.6895	0.00335974	0.00984328	7
ENSGACG00000018704	gc2	guanylyl cyclase 2 [Source:ZFIN;Acc:ZDB-GENE-011128-8]	groupVII	590628	598335	-1	-0.441938	-2.31162	-0.526851	-0.697205	13.6744	0.0033836	0.00991259	9
ENSGACG00000015230	HCN2 (2 of 2)	hyperpolarization activated cyclic nucleotide gated potassium channel 2 [Source:HGNC Symbol;Acc:HGNC:4846]	groupIII	7266517	7285700	1	-0.264047	0.429015	0.0820701	3.6045	13.6721	0.00338728	0.0099228	11
ENSGACG00000007624	cryba2a	crystallin, beta A2a [Source:ZFIN;Acc:ZDB-GENE-040625-8]	groupXVI	14978748	14981290	-1	4.41067	-3.03256	-3.45081	-2.07511	13.6346	0.00344717	0.0100971	6
ENSGACG00000019228	PLD5 (2 of 2)	phospholipase D family, member 5 [Source:HGNC Symbol;Acc:HGNC:26879]	groupIX	16064180	16071483	1	-0.492995	1.38735	0.560416	4.54536	13.601	0.00350184	0.0102548	8
ENSGACG00000019075	sox5	SRY-box containing gene 5 [Source:ZFIN;Acc:ZDB-GENE-000607-13]	groupIV	21308461	21365649	-1	-0.0387084	0.383834	-0.218621	4.84179	13.5918	0.00351693	0.0102984	11
ENSGACG00000018054	serping1	serpin peptidase inhibitor, clade G (C1 inhibitor), member 1 [Source:ZFIN;Acc:ZDB-GENE-030131-1262]	groupIX	9801277	9804719	-1	1.71492	-0.796668	-0.170088	0.404047	13.5666	0.00355852	0.010419	6
ENSGACG00000010609	ptk2bb	protein tyrosine kinase 2 beta, b [Source:ZFIN;Acc:ZDB-GENE-020507-1]	groupXVIII	10583092	10597725	1	0.774446	-0.0988262	1.52618	3.46002	13.5394	0.00360417	0.0105514	12
ENSGACG00000013484			scaffold_196	93784	96468	-1	0.513076	-1.90142	3.8839	-1.20732	13.5197	0.00363746	0.0106477	2
ENSGACG00000014361	SOCS1 (1 of 2)	suppressor of cytokine signaling 1 [Source:HGNC Symbol;Acc:HGNC:19383]	groupXI	14940995	14942608	1	0.0783902	-2.00298	1.71527	-0.963595	13.5107	0.00365276	0.0106918	9
ENSGACG00000006539	myl1	myosin, light chain 1, alkali; skeletal, fast [Source:ZFIN;Acc:ZDB-GENE-030131-8109]	groupXVI	12804559	12809401	1	-1.60817	2.77497	-0.333069	-0.893846	13.4987	0.00367331	0.0107514	8
ENSGACG00000004669			groupXV	771509	780654	1	0.91661	-0.0385812	-0.20731	2.88204	13.4847	0.00369749	0.0108215	6
ENSGACG00000016169	zgc:73226	zgc:73226 [Source:ZFIN;Acc:ZDB-GENE-050703-8]	groupXIV	3251935	3256350	-1	0.203347	-0.234936	0.619263	3.30298	13.4723	0.003719	0.0108832	7
ENSGACG00000015171			groupIII	7098658	7106063	-1	-0.323809	-1.57453	-0.310464	2.69152	13.4705	0.00372204	0.0108915	9
ENSGACG00000014295	si:ch211-157c3.4	si:ch211-157c3.4 [Source:ZFIN;Acc:ZDB-GENE-030131-8454]	groupXI	14754163	14757380	1	-2.9833	1.41102	-0.611096	-0.299346	13.4315	0.00379066	0.0110904	5
ENSGACG00000016707	abca4b	ATP-binding cassette, sub-family A (ABC1), member 4b [Source:ZFIN;Acc:ZDB-GENE-050517-4]	groupIII	11515854	11543148	1	0.270659	-1.50153	-0.0919157	1.80746	13.4176	0.0038152	0.0111615	9
ENSGACG00000016625	PIEZO2 (2 of 2)	piezo-type mechanosensitive ion channel component 2 [Source:HGNC Symbol;Acc:HGNC:26270]	groupIII	11053380	11072649	1	1.48779	-0.527387	-0.153488	1.54654	13.403	0.00384139	0.0112368	6
ENSGACG00000002000	abca4a	ATP-binding cassette, sub-family A (ABC1), member 4a [Source:ZFIN;Acc:ZDB-GENE-050517-3]	groupXXI	2180740	2208802	1	0.0704286	-1.43838	-0.353573	0.911884	13.3683	0.00390418	0.0114192	9
ENSGACG00000006164			groupI	2703457	2704480	-1	-2.13551	0.899911	-0.952858	-0.930463	13.3311	0.00397266	0.0116174	10
ENSGACG00000006984	ndrg1b	N-myc downstream regulated gene 1b [Source:ZFIN;Acc:ZDB-GENE-040426-1648]	groupXX	7813416	7816606	1	0.253934	-4.36134	0.551529	0.574991	13.3209	0.00399164	0.0116716	4
ENSGACG00000015025	SLC27A2 (3 of 3)	solute carrier family 27 (fatty acid transporter), member 2 [Source:HGNC Symbol;Acc:HGNC:10996]	groupII	5798521	5805341	-1	0.95689	-1.01145	0.706496	1.70797	13.2953	0.00403955	0.0118103	12
ENSGACG00000001743	scel	sciellin [Source:ZFIN;Acc:ZDB-GENE-030616-15]	groupXVI	2420506	2423117	-1	-3.24933	1.42389	-0.649198	-0.980891	13.2876	0.00405425	0.0118526	5
ENSGACG00000006331	samsn1a	SAM domain, SH3 domain and nuclear localisation signals, 1a [Source:ZFIN;Acc:ZDB-GENE-030131-8639]	groupI	3080902	3085572	1	-0.408628	-1.30783	1.18262	2.68056	13.2851	0.00405888	0.0118655	12
ENSGACG00000003833	osbpl7	oxysterol binding protein-like 7 [Source:ZFIN;Acc:ZDB-GENE-041010-212]	groupV	4513231	4520750	-1	0.578807	-3.4706	-0.764822	-1.31317	13.2699	0.00408791	0.0119496	3
ENSGACG00000014881			groupXI	16223914	16226389	-1	-0.0753967	-0.821142	1.05528	1.03827	13.2559	0.00411459	0.0120269	12
ENSGACG00000019598	TRIM14 (74 of 76)	tripartite motif containing 14 [Source:HGNC Symbol;Acc:HGNC:16283]	groupIX	18443757	18444299	1	0.0107129	-2.70567	1.01677	-0.700181	13.2443	0.00413697	0.012091	9
ENSGACG00000001785	zgc:153932	zgc:153932 [Source:ZFIN;Acc:ZDB-GENE-070209-223]	scaffold_593	9963	12056	1	-0.571606	-0.821383	1.04738	0.478133	13.2133	0.00419724	0.012265	12
ENSGACG00000010643	BPIFC (2 of 3)	BPI fold containing family C [Source:HGNC Symbol;Acc:HGNC:16503]	groupXVII	10920133	10925973	1	0.587026	-1.42927	1.89519	3.64562	13.203	0.00421758	0.0123237	12
ENSGACG00000010941	ZACN	zinc activated ligand-gated ion channel [Source:HGNC Symbol;Acc:HGNC:29504]	groupXI	8866306	8895216	1	-3.06923	0.347042	2.16014	-0.0557971	13.1423	0.00433881	0.0126713	10
ENSGACG00000000507	gnrhr1	gonadotropin releasing hormone receptor 1 [Source:ZFIN;Acc:ZDB-GENE-090128-2]	scaffold_101	279647	283887	-1	0.555397	-0.0281918	-0.402031	3.19232	13.1405	0.00434239	0.012681	7
ENSGACG00000005377	and1	actinodin1 [Source:ZFIN;Acc:ZDB-GENE-030131-9105]	groupXXI	11194757	11199747	1	-0.425441	-0.537739	0.59003	1.16238	13.1223	0.00437947	0.0127871	7
ENSGACG00000017352	TNNT3 (2 of 2)	troponin T type 3 (skeletal, fast) [Source:HGNC Symbol;Acc:HGNC:11950]	groupII	21934736	21940961	-1	-0.942362	2.24077	-0.494567	0.978273	13.108	0.00440878	0.0128705	10
ENSGACG00000005156			groupXV	1454413	1458371	-1	1.61026	-1.14585	-1.43156	-1.18953	13.0772	0.00447268	0.0130548	6
ENSGACG00000001648	gabrr3b	gamma-aminobutyric acid (GABA) A receptor, rho 3b [Source:ZFIN;Acc:ZDB-GENE-131120-131]	scaffold_355	1181	11877	1	-0.00291231	-1.33586	-0.15543	0.836248	13.0714	0.00448474	0.0130892	9
ENSGACG00000017687	nefla	neurofilament, light polypeptide a [Source:ZFIN;Acc:ZDB-GENE-091117-1]	groupXIV	8929320	8932047	1	2.4185	-0.361906	1.10038	1.81108	13.0708	0.00448595	0.013092	6
ENSGACG00000006252			groupXII	7636077	7638864	-1	1.30909	-1.86095	2.9476	1.08083	13.0553	0.00451843	0.013186	2
ENSGACG00000002176	si:ch211-125o16.4	si:ch211-125o16.4 [Source:ZFIN;Acc:ZDB-GENE-131120-100]	groupVI	85476	88028	-1	-3.43618	1.49231	-1.19767	-0.545887	13.0529	0.00452349	0.0131993	5
ENSGACG00000019414	CPZ (2 of 2)	carboxypeptidase Z [Source:HGNC Symbol;Acc:HGNC:2333]	groupVII	4420249	4424357	1	0.690747	-0.621675	-0.0698862	3.04029	12.9904	0.00465741	0.0135861	6
ENSGACG00000014845	olfml2bb	olfactomedin-like 2Bb [Source:ZFIN;Acc:ZDB-GENE-070912-266]	groupIII	5978529	5985941	1	-0.655934	0.573318	-1.07313	2.39455	12.9602	0.00472346	0.0137756	10
ENSGACG00000009759	myof	myoferlin [Source:ZFIN;Acc:ZDB-GENE-040426-1138]	groupV	11563352	11580379	1	-0.855439	0.439505	-0.10047	2.60722	12.9421	0.00476349	0.0138915	10
ENSGACG00000015110	si:ch73-96b22.1	si:ch73-96b22.1 [Source:ZFIN;Acc:ZDB-GENE-100922-183]	scaffold_68	419740	424812	-1	-3.18405	2.55765	-0.442993	-1.67119	12.9388	0.00477073	0.0139119	8
ENSGACG00000009169	esrp1	epithelial splicing regulatory protein 1 [Source:ZFIN;Acc:ZDB-GENE-070112-1732]	groupXX	10732757	10740516	1	-2.34165	1.2335	-0.645047	-0.670238	12.9312	0.0047878	0.0139608	10
ENSGACG00000013667	lgals9l1	lectin, galactoside-binding, soluble, 9 (galectin 9)-like 1 [Source:ZFIN;Acc:ZDB-GENE-030131-9543]	groupI	19630729	19638360	1	0.0437378	-0.858337	1.07101	4.43536	12.8924	0.00487508	0.014212	12
ENSGACG00000008991	sp5l	Sp5 transcription factor-like [Source:ZFIN;Acc:ZDB-GENE-030131-2981]	groupXII	11144529	11145968	1	2.03502	-1.30212	3.46587	-2.53966	12.8854	0.00489099	0.0142576	2
ENSGACG00000005968	ndrg1a	N-myc downstream regulated gene 1a [Source:ZFIN;Acc:ZDB-GENE-030826-34]	groupX	8666553	8677287	-1	-0.0523425	-0.782396	-0.194124	5.65538	12.8829	0.00489686	0.0142731	7
ENSGACG00000016970	skila	SKI-like oncogene a [Source:ZFIN;Acc:ZDB-GENE-070912-548]	groupIII	12474038	12498128	1	-0.112212	0.448904	0.0970339	4.25722	12.8736	0.00491806	0.0143332	11
ENSGACG00000013249	RAB25 (2 of 2)	RAB25, member RAS oncogene family [Source:HGNC Symbol;Acc:HGNC:18238]	groupXX	16004671	16011903	1	-3.05597	1.5781	-0.390799	-0.790658	12.8648	0.00493834	0.0143915	5
ENSGACG00000000790			scaffold_47	578155	596424	-1	-0.000333413	-1.71098	0.907381	1.87083	12.8271	0.00502573	0.0146436	9
ENSGACG00000002310	sdpra	serum deprivation response a [Source:ZFIN;Acc:ZDB-GENE-090313-215]	groupXVI	5120895	5134417	-1	-1.62674	0.550651	0.0908498	0.158981	12.824	0.00503301	0.014664	10
ENSGACG00000008357	pfkma	phosphofructokinase, muscle a [Source:ZFIN;Acc:ZDB-GENE-040912-135]	groupXII	10481808	10490116	1	-1.09199	3.06261	0.0200643	-1.30984	12.8169	0.00504976	0.0147111	8
ENSGACG00000003404			groupXXI	7946497	7947460	1	-3.36775	1.0663	0.0303758	-0.221321	12.7698	0.00516176	0.0150348	5
ENSGACG00000017221	pou4f2	POU domain, class 4, transcription factor 2 [Source:ZFIN;Acc:ZDB-GENE-040401-1]	groupIX	6745083	6797187	-1	-0.425975	-2.4819	3.86961	-0.732566	12.7334	0.00525016	0.0152896	2
ENSGACG00000001674	NEBL	nebulette [Source:HGNC Symbol;Acc:HGNC:16932]	scaffold_213	321	11585	-1	0.227256	0.292761	0.380873	6.68207	12.7097	0.00530844	0.0154576	7
ENSGACG00000008124	MYOF (1 of 2)	myoferlin [Source:HGNC Symbol;Acc:HGNC:3656]	groupVI	9500387	9521995	1	1.12477	-0.273888	-0.9501	1.67276	12.6997	0.00533322	0.0155288	6
ENSGACG00000018472			groupIX	12320854	12327711	-1	-1.0101	-1.67573	-0.0998275	0.0767847	12.6938	0.00534782	0.0155705	9
ENSGACG00000003697	pck1	phosphoenolpyruvate carboxykinase 1 (soluble) [Source:ZFIN;Acc:ZDB-GENE-030909-11]	groupXVII	1121929	1127118	1	-1.03655	-1.21074	0.704376	5.13495	12.6925	0.00535095	0.0155787	9
ENSGACG00000011155	cd40	CD40 antigen [Source:ZFIN;Acc:ZDB-GENE-090313-95]	groupXII	14765314	14769502	1	-0.0868261	-0.982015	0.415869	4.45231	12.6248	0.00552239	0.0160722	7
ENSGACG00000016134	hsd17b7	hydroxysteroid (17-beta) dehydrogenase 7 [Source:ZFIN;Acc:ZDB-GENE-061013-378]	groupIII	9564767	9568355	1	-0.861281	-0.273774	-0.0359666	2.82987	12.5884	0.00561673	0.0163449	7
ENSGACG00000008805	ST3GAL1	ST3 beta-galactoside alpha-2,3-sialyltransferase 1 [Source:HGNC Symbol;Acc:HGNC:10862]	groupX	13142212	13171897	-1	0.0471563	0.461192	-0.249659	3.62644	12.5848	0.00562627	0.0163717	11
ENSGACG00000012954	tnnc1b	troponin C type 1b (slow) [Source:ZFIN;Acc:ZDB-GENE-040625-62]	groupXII	17267202	17271644	-1	-4.61803	2.01655	-1.84596	-1.31127	12.5837	0.00562922	0.0163794	5
ENSGACG00000015994	SLC35A3 (2 of 2)	solute carrier family 35 (UDP-N-acetylglucosamine (UDP-GlcNAc) transporter), member A3 [Source:HGNC Symbol;Acc:HGNC:11023]	groupIII	9122054	9129523	-1	-1.23147	1.60379	-0.241655	-1.03022	12.5424	0.00573822	0.0166927	10
ENSGACG00000018321	zgc:110712	zgc:110712 [Source:ZFIN;Acc:ZDB-GENE-050417-50]	groupIX	10944595	10949412	-1	-1.8305	1.25982	0.0119265	2.16952	12.4726	0.00592772	0.017238	10
ENSGACG00000005323	cacna1g	calcium channel, voltage-dependent, T type, alpha 1G subunit [Source:ZFIN;Acc:ZDB-GENE-090514-2]	groupV	6457076	6571528	-1	0.465229	0.250558	0.162899	7.24597	12.4666	0.00594425	0.0172851	7
ENSGACG00000014764	sv2ba	synaptic vesicle glycoprotein 2 ba [Source:ZFIN;Acc:ZDB-GENE-070209-134]	groupII	4617301	4628451	-1	-0.366592	-2.49135	0.0835678	-0.513087	12.4634	0.00595326	0.0173103	9
ENSGACG00000003614	bdh1	3-hydroxybutyrate dehydrogenase, type 1 [Source:ZFIN;Acc:ZDB-GENE-070410-130]	groupXXI	8259730	8263422	-1	-0.29929	-0.508294	0.480503	3.90438	12.4497	0.00599109	0.0174173	7
ENSGACG00000005954	glb1l	galactosidase, beta 1-like [Source:ZFIN;Acc:ZDB-GENE-050309-196]	groupXVI	11568969	11574338	1	-0.0988105	-0.48844	-0.0595631	4.17855	12.4406	0.00601655	0.0174893	7
ENSGACG00000015168			groupIII	7062853	7089306	-1	-0.0737427	0.289061	-0.177324	7.01166	12.429	0.00604904	0.0175827	11
ENSGACG00000009365			groupX	14501579	14507522	-1	0.182698	-4.10369	-3.1607	0.591238	12.4239	0.00606362	0.0176231	3
ENSGACG00000018910	tfec	transcription factor EC [Source:ZFIN;Acc:ZDB-GENE-041210-21]	groupIV	18862829	18870435	1	-0.111269	-1.81892	0.893552	0.256687	12.411	0.00609989	0.0177275	9
ENSGACG00000001061	nuak2	NUAK family, SNF1-like kinase, 2 [Source:ZFIN;Acc:ZDB-GENE-050208-563]	scaffold_27	3042977	3050106	-1	-0.675306	0.232696	0.3844	1.84091	12.3808	0.00618623	0.0179753	11
ENSGACG00000007315	mpeg1	macrophage expressed 1 [Source:ZFIN;Acc:ZDB-GENE-030131-7347]	groupXIII	6521306	6524043	1	-0.364579	-1.34532	1.9699	3.75131	12.3775	0.00619578	0.018001	9
ENSGACG00000014851	atp11a (2 of 2)	ATPase, class VI, type 11A [Source:ZFIN;Acc:ZDB-GENE-090311-52]	groupI	23025627	23036352	-1	-0.240026	0.543479	0.43206	4.17394	12.3744	0.00620463	0.0180257	11
ENSGACG00000001789	si:dkey-269d20.3	si:dkey-269d20.3 [Source:ZFIN;Acc:ZDB-GENE-100922-34]	scaffold_122	252753	253987	1	-0.100903	-1.68782	0.545464	-0.344715	12.3608	0.00624397	0.0181389	9
ENSGACG00000013988	mkl2b	MKL/myocardin-like 2b [Source:ZFIN;Acc:ZDB-GENE-030619-16]	groupXI	13726297	13732972	-1	-0.510642	-0.42803	0.66517	4.74986	12.3605	0.00624487	0.0181405	7
ENSGACG00000015618	DMBX1 (2 of 2)	diencephalon/mesencephalon homeobox 1 [Source:HGNC Symbol;Acc:HGNC:19026]	groupIII	8732915	8738288	-1	1.68694	-1.31601	4.74176	-2.19365	12.3278	0.00634071	0.0184168	2
ENSGACG00000016922	macrod1	MACRO domain containing 1 [Source:ZFIN;Acc:ZDB-GENE-040912-100]	groupIV	5083045	5165312	-1	-0.202782	0.603855	-0.66036	2.8605	12.3001	0.00642275	0.0186529	11
ENSGACG00000016509	gnb5b	guanine nucleotide binding protein (G protein), beta 5b [Source:ZFIN;Acc:ZDB-GENE-040426-1712]	groupII	15599550	15607029	-1	0.234412	-0.619429	-0.0765407	2.48457	12.2971	0.00643163	0.0186776	7
ENSGACG00000007277	tfap2b	transcription factor AP-2 beta [Source:ZFIN;Acc:ZDB-GENE-050417-394]	groupXVIII	6109801	6120188	-1	0.930892	-1.3082	3.33911	-0.93179	12.27	0.0065131	0.018911	2
ENSGACG00000017927	cebpd	CCAAT/enhancer binding protein (C/EBP), delta [Source:ZFIN;Acc:ZDB-GENE-020111-4]	groupIII	16376602	16377524	-1	-0.398252	-0.597001	0.49695	4.28134	12.2593	0.00654554	0.019003	7
ENSGACG00000001107	VWA5A (1 of 3)	von Willebrand factor A domain containing 5A [Source:HGNC Symbol;Acc:HGNC:6658]	scaffold_598	1421	9182	-1	1.56251	-0.520023	0.0526332	1.71977	12.2353	0.00661902	0.0192108	6
ENSGACG00000008755			groupXII	10836518	10857059	1	-0.114242	0.400277	0.0668321	4.55133	12.2262	0.00664721	0.0192915	11
ENSGACG00000004067	cacnb2a	calcium channel, voltage-dependent, beta 2a [Source:ZFIN;Acc:ZDB-GENE-080808-7]	groupXXI	9401018	9408367	-1	0.207154	-0.000676562	0.364939	5.2413	12.1947	0.00674496	0.019574	7
ENSGACG00000008053	si:ch211-256m1.8 (1 of 4)	si:ch211-256m1.8 [Source:ZFIN;Acc:ZDB-GENE-131127-417]	groupXI	5019935	5020840	-1	-1.28667	-4.63826	0.90578	-0.495265	12.1716	0.00681801	0.0197838	4
ENSGACG00000016297	slc45a2	solute carrier family 45, member 2 [Source:ZFIN;Acc:ZDB-GENE-050208-97]	groupXIV	3516755	3524906	-1	0.166368	-0.812846	-1.54974	-0.542502	12.1664	0.00683426	0.0198298	6
ENSGACG00000017076	npas4a	neuronal PAS domain protein 4a [Source:ZFIN;Acc:ZDB-GENE-060616-396]	groupIV	5510202	5514798	1	0.564876	0.242058	0.368051	4.21254	12.1459	0.00689981	0.0200177	7
ENSGACG00000020876	irf1b	interferon regulatory factor 1b [Source:ZFIN;Acc:ZDB-GENE-041114-13]	groupVII	27201860	27205236	-1	-0.284466	-1.15005	0.864089	3.92641	12.0787	0.00711822	0.0206442	12
ENSGACG00000012890	pax7a	paired box gene 7a [Source:ZFIN;Acc:ZDB-GENE-990415-201]	groupXII	17018402	17065768	1	1.68099	-0.466971	4.34831	-2.4161	12.0741	0.00713355	0.0206863	2
ENSGACG00000004655	chrna4b	cholinergic receptor, nicotinic, alpha 4b [Source:ZFIN;Acc:ZDB-GENE-090505-3]	groupXII	4256970	4263701	1	0.29432	0.60114	-0.00687165	4.79277	12.0728	0.00713795	0.0206979	7
ENSGACG00000019472	nav3	neuron navigator 3 [Source:ZFIN;Acc:ZDB-GENE-021205-1]	groupIV	25318371	25416178	1	-0.00275457	0.399779	-0.0285426	6.36456	12.0551	0.00719685	0.0208663	11
ENSGACG00000016681	irx5a	iroquois homeobox protein 5a [Source:ZFIN;Acc:ZDB-GENE-010716-2]	groupII	16999232	17003358	-1	0.342263	-1.54246	3.12202	-0.410302	12.0472	0.00722336	0.0209419	2
ENSGACG00000001810	si:ch211-114l13.9	si:ch211-114l13.9 [Source:ZFIN;Acc:ZDB-GENE-070424-116]	scaffold_1118	118	1706	-1	-2.32397	1.74766	-0.548552	-0.326668	12.0426	0.00723855	0.0209848	8
ENSGACG00000018337	unc5a	unc-5 homolog A (C. elegans) [Source:ZFIN;Acc:ZDB-GENE-080219-19]	groupIV	13161092	13215854	1	-0.338112	0.320522	-0.286578	3.97523	12.0376	0.00725538	0.0210324	11
ENSGACG00000002719	AIM1L	absent in melanoma 1-like [Source:HGNC Symbol;Acc:HGNC:17295]	groupX	3073192	3083180	1	-2.13217	1.2666	-0.380424	-0.1882	12.0088	0.00735303	0.021313	10
ENSGACG00000003582	tnfsf13b	tumor necrosis factor (ligand) superfamily, member 13b [Source:ZFIN;Acc:ZDB-GENE-080204-44]	groupXVI	8023067	8024372	-1	0.613277	-2.06485	1.37153	-0.123901	11.99	0.00741754	0.0214988	9
ENSGACG00000006329			groupXVI	12120235	12126773	-1	-0.223882	0.302806	-0.0353513	4.06844	11.9818	0.00744572	0.0215767	11
ENSGACG00000000753	mtm1	myotubularin 1 [Source:ZFIN;Acc:ZDB-GENE-051113-128]	scaffold_47	288717	296739	-1	-0.264486	0.327039	0.500699	3.65451	11.9673	0.00749594	0.0217185	11
ENSGACG00000018429			groupIX	12187897	12189566	-1	0.284075	-0.917772	1.16824	3.53876	11.9576	0.00752987	0.0218156	12
ENSGACG00000015326	sema4e	semaphorin 4e [Source:ZFIN;Acc:ZDB-GENE-990715-7]	groupIII	7535753	7541850	-1	-0.675372	-0.639832	0.491439	2.14011	11.936	0.00760572	0.0220341	7
ENSGACG00000019284	myh10 (2 of 2)	myosin, heavy chain 10, non-muscle [Source:ZFIN;Acc:ZDB-GENE-030616-162]	groupIX	16300906	16335278	1	-0.0995383	0.334714	0.0914794	7.14533	11.9209	0.0076591	0.0221862	11
ENSGACG00000009709	TMEM30B	transmembrane protein 30B [Source:HGNC Symbol;Acc:HGNC:27254]	groupXV	7950325	7955376	1	-2.45897	0.263212	-0.180954	-0.60966	11.9063	0.00771113	0.0223343	10
ENSGACG00000012564			groupXI	11838445	11838984	1	1.52822	-2.37622	2.7427	-2.1035	11.9023	0.00772541	0.0223744	2
ENSGACG00000012600			groupXX	14209796	14211021	-1	-0.181665	-1.98746	1.3759	0.0266134	11.9002	0.00773291	0.0223948	9
ENSGACG00000019272	RHBDF2	rhomboid 5 homolog 2 (Drosophila) [Source:HGNC Symbol;Acc:HGNC:20788]	groupIX	16196378	16203822	1	-0.470141	0.248584	0.463777	2.80482	11.8632	0.00786695	0.0227817	11
ENSGACG00000013764	gabra5	gamma-aminobutyric acid (GABA) A receptor, alpha 5 [Source:ZFIN;Acc:ZDB-GENE-081104-30]	groupVIII	17825606	17837021	1	-0.149237	0.565035	-0.101352	6.17206	11.8395	0.00795374	0.0230291	11
ENSGACG00000009118	gem	GTP binding protein overexpressed in skeletal muscle [Source:ZFIN;Acc:ZDB-GENE-060825-251]	groupXX	10698583	10701028	-1	-0.282677	0.532483	0.373073	5.43141	11.8302	0.00798818	0.0231275	11
ENSGACG00000007182	mylpfb	myosin light chain, phosphorylatable, fast skeletal muscle b [Source:ZFIN;Acc:ZDB-GENE-040912-115]	groupV	9421587	9424849	-1	-4.02052	2.50772	-0.916051	0.0247634	11.808	0.00807065	0.0233649	5
ENSGACG00000005604	soga1	suppressor of glucose, autophagy associated 1 [Source:ZFIN;Acc:ZDB-GENE-090313-188]	groupXII	6516487	6573473	-1	-0.12702	0.406745	-0.0366176	4.93355	11.8057	0.00807927	0.0233885	11
ENSGACG00000011575			groupXV	11264050	11265010	-1	1.47475	-0.870413	0.835226	0.173004	11.7712	0.0082095	0.0237615	6
ENSGACG00000008090	NAPSA	napsin A aspartic peptidase [Source:HGNC Symbol;Acc:HGNC:13395]	groupXI	5068126	5071647	-1	-0.0624889	-0.853284	0.284558	3.40477	11.7524	0.0082814	0.0239668	7
ENSGACG00000016172	prdx1	peroxiredoxin 1 [Source:ZFIN;Acc:ZDB-GENE-050320-35]	groupIII	9656798	9659142	1	0.10456	-0.848676	0.191971	4.48623	11.7491	0.00829383	0.0240014	7
ENSGACG00000020827	ncf1	neutrophil cytosolic factor 1 [Source:ZFIN;Acc:ZDB-GENE-031006-6]	groupVII	26211536	26217024	1	0.309935	-1.64033	0.972541	2.62044	11.7454	0.00830833	0.024042	12
ENSGACG00000019799	gpha2	glycoprotein hormone alpha 2 [Source:ZFIN;Acc:ZDB-GENE-091029-1]	groupVII	7677892	7678577	1	-0.0510353	-1.24421	-0.549668	-0.493099	11.7412	0.0083244	0.0240857	9
ENSGACG00000002897			groupX	3240832	3242595	-1	-2.94868	1.2974	-0.645712	2.21941	11.7259	0.00838378	0.0242548	5
ENSGACG00000003570	myo16	myosin XVI [Source:ZFIN;Acc:ZDB-GENE-070912-470]	groupXVI	7947036	8001612	-1	-0.00890525	0.442333	-0.178247	5.91147	11.6943	0.00850716	0.0246089	11
ENSGACG00000019997	dock11 (2 of 2)	dedicator of cytokinesis 11 [Source:ZFIN;Acc:ZDB-GENE-060503-196]	groupVII	9311356	9318824	1	-0.0485289	-0.400273	-0.304531	4.09168	11.691	0.00852025	0.0246454	7
ENSGACG00000020652	pygma	phosphorylase, glycogen (muscle) A [Source:ZFIN;Acc:ZDB-GENE-050522-482]	groupVII	21858509	21866071	1	-1.63132	2.57761	-0.445098	-1.22362	11.6858	0.00854093	0.024701	8
ENSGACG00000012821			groupI	16576953	16584352	1	0.303993	-0.396495	0.264101	5.09128	11.6828	0.00855279	0.0247338	7
ENSGACG00000008401	PRR35	proline rich 35 [Source:HGNC Symbol;Acc:HGNC:14139]	groupV	10406807	10408748	-1	1.2402	-3.21753	0.621006	-1.57686	11.6615	0.00863748	0.0249759	9
ENSGACG00000001675			scaffold_120	284160	295979	-1	0.748894	1.88023	0.60854	1.51058	11.6482	0.00869086	0.0251288	8
ENSGACG00000011598	GRM1 (1 of 2)	glutamate receptor, metabotropic 1 [Source:HGNC Symbol;Acc:HGNC:4593]	groupXV	11313611	11328034	1	-0.0347609	0.34848	0.444222	4.58015	11.6451	0.00870335	0.025162	11
ENSGACG00000015002	MPP4 (2 of 2)	membrane protein, palmitoylated 4 (MAGUK p55 subfamily member 4) [Source:HGNC Symbol;Acc:HGNC:13680]	scaffold_74	413269	421422	1	0.15586	-1.7954	-0.265394	-0.276972	11.6236	0.00879043	0.0254109	9
ENSGACG00000000547			scaffold_229	28615	29289	1	-0.84068	4.94638	1.42968	-0.085386	11.6029	0.00887481	0.0256533	8
ENSGACG00000008070	twist1a	twist1a [Source:ZFIN;Acc:ZDB-GENE-000210-6]	groupXX	9505813	9506319	1	0.215386	-1.14004	0.549347	0.358864	11.6	0.00888701	0.0256871	9
ENSGACG00000004049	TUBA8 (2 of 5)	tubulin, alpha 8 [Source:HGNC Symbol;Acc:HGNC:12410]	groupVI	4390950	4392855	1	-0.635906	-0.623072	0.710226	4.69461	11.5938	0.00891241	0.0257561	7
ENSGACG00000010645	thyn1	thymocyte nuclear protein 1 [Source:ZFIN;Acc:ZDB-GENE-040426-1585]	groupI	11088226	11089320	1	0.0768953	-0.268482	0.428727	3.21432	11.5903	0.00892682	0.0257948	7
ENSGACG00000010084	si:dkey-206f10.1	si:dkey-206f10.1 [Source:ZFIN;Acc:ZDB-GENE-041014-154]	groupXVIII	9873600	9881101	-1	2.65935	0.907793	2.71667	1.12484	11.5758	0.00898702	0.0259673	6
ENSGACG00000008737			groupXVI	17425826	17428816	1	0.683283	-2.4781	-0.397682	-0.873939	11.5634	0.00903891	0.0261142	6
ENSGACG00000004676	exoc3l4	exocyst complex component 3-like 4 [Source:ZFIN;Acc:ZDB-GENE-081028-71]	groupXV	802977	814404	1	-1.25814	0.515609	0.368991	0.831007	11.5565	0.00906744	0.0261952	10
ENSGACG00000001742			scaffold_232	44159	79908	1	1.18604	-1.68616	-0.150376	2.32788	11.5497	0.00909614	0.0262766	6
ENSGACG00000018007	csf1ra	colony stimulating factor 1 receptor, a [Source:ZFIN;Acc:ZDB-GENE-001205-1]	groupIV	10922842	10930745	1	-1.18324	0.0663287	0.564117	3.40377	11.4985	0.00931423	0.0268943	10
ENSGACG00000009676			groupVIII	12468629	12470421	1	-2.44254	0.422405	1.13923	-0.122314	11.4772	0.00940649	0.0271576	10
ENSGACG00000014150	trim25l	tripartite motif-containing 25-like [Source:ZFIN;Acc:ZDB-GENE-040914-87]	groupI	21037368	21043291	1	-2.00838	0.636139	0.513103	-0.953142	11.4638	0.00946483	0.0273229	10
ENSGACG00000000303	ACTA2	actin, alpha 2, smooth muscle, aorta [Source:HGNC Symbol;Acc:HGNC:130]	scaffold_1221	1931	3677	1	0.271624	-0.468375	-0.448231	2.50341	11.4353	0.00959064	0.0276829	7
ENSGACG00000016748	dmxl2	Dmx-like 2 [Source:ZFIN;Acc:ZDB-GENE-031007-6]	groupII	18050954	18082549	-1	-0.156002	0.350316	0.0626734	8.08907	11.4205	0.00965631	0.0278709	11
ENSGACG00000015787			scaffold_135	72730	74567	-1	-0.513949	-3.01724	1.84522	1.13019	11.4029	0.0097355	0.0280946	4
ENSGACG00000020439			groupVII	18585497	18603040	1	0.00204391	0.405743	0.0539213	6.06337	11.389	0.00979822	0.0282708	11
ENSGACG00000019760	plcb3	phospholipase C, beta 3 (phosphatidylinositol-specific) [Source:ZFIN;Acc:ZDB-GENE-030616-594]	groupVII	7552878	7564274	1	-0.0651635	0.649299	0.374142	3.91959	11.385	0.00981608	0.0283191	11
ENSGACG00000004196	TNNC2 (1 of 2)	troponin C type 2 (fast) [Source:HGNC Symbol;Acc:HGNC:11944]	groupXII	3687732	3690627	1	-1.87173	1.79985	-1.35989	-0.713302	11.3803	0.00983736	0.0283773	8
ENSGACG00000011928	BEAN1	brain expressed, associated with NEDD4, 1 [Source:HGNC Symbol;Acc:HGNC:24160]	groupVI	16240469	16262214	1	-0.848356	-0.189594	0.521377	0.858408	11.3459	0.00999507	0.028824	7
ENSGACG00000020845	rad51d	RAD51 homolog D (S. cerevisiae) [Source:ZFIN;Acc:ZDB-GENE-040426-2490]	groupVII	26760863	26768254	1	-0.838733	-0.521991	1.37005	0.626681	11.3438	0.0100047	0.0288485	12
ENSGACG00000015537	cybb	cytochrome b-245, beta polypeptide (chronic granulomatous disease) [Source:ZFIN;Acc:ZDB-GENE-040426-1380]	groupI	27696441	27700661	1	0.164048	-1.76664	0.422056	4.05823	11.3414	0.010016	0.0288795	9
ENSGACG00000001939	C14orf159	chromosome 14 open reading frame 159 [Source:HGNC Symbol;Acc:HGNC:20498]	scaffold_128	80257	89042	-1	0.0635276	0.487629	-0.629809	5.29466	11.3257	0.010089	0.0290881	11
ENSGACG00000001632	samhd1 (2 of 3)	SAM domain and HD domain 1 [Source:ZFIN;Acc:ZDB-GENE-090313-386]	scaffold_180	90678	100224	-1	-0.0421436	-0.557505	0.184346	3.75209	11.3118	0.0101541	0.0292744	7
ENSGACG00000000580			scaffold_346	14463	20903	1	-0.198811	-1.90707	-1.01673	-0.690087	11.3026	0.0101974	0.0293956	9
ENSGACG00000000715	serpine1	serpin peptidase inhibitor, clade E (nexin, plasminogen activator inhibitor type 1), member 1 [Source:ZFIN;Acc:ZDB-GENE-070912-60]	scaffold_47	95842	99259	1	0.147814	-1.84252	-0.411361	-0.22239	11.2919	0.010248	0.0295365	9
ENSGACG00000001387	spint2	serine peptidase inhibitor, Kunitz type, 2 [Source:ZFIN;Acc:ZDB-GENE-061013-323]	scaffold_186	109966	119530	1	-1.03904	0.426368	0.0218443	2.75326	11.2878	0.0102673	0.0295906	10
ENSGACG00000012740	CRYBB3 (2 of 2)	crystallin, beta B3 [Source:HGNC Symbol;Acc:HGNC:2400]	groupXIII	14805972	14808063	1	0.88915	-2.41653	-1.13152	-1.1657	11.2832	0.0102889	0.0296494	6
ENSGACG00000018599	tpm2	tropomyosin 2 (beta) [Source:ZFIN;Acc:ZDB-GENE-040625-114]	groupXIV	14793585	14812370	1	-0.666936	1.7143	-0.44583	2.10278	11.2628	0.0103863	0.0299231	10
ENSGACG00000003800	krt18	keratin 18 [Source:ZFIN;Acc:ZDB-GENE-030411-6]	groupXII	3021372	3029708	1	-0.472507	-0.344507	-0.305741	6.64681	11.2533	0.010432	0.0300514	7
ENSGACG00000008654	stx11b.1	syntaxin 11b, tandem duplicate 1 [Source:ZFIN;Acc:ZDB-GENE-040426-1893]	groupXVIII	8152279	8154796	-1	-2.26279	1.04459	-0.146815	-1.03539	11.2436	0.0104789	0.0301831	10
ENSGACG00000015768			scaffold_135	46079	46944	1	-4.57098	-1.29101	2.41755	-2.55847	11.2367	0.0105127	0.0302769	1
ENSGACG00000010244	idh3a	isocitrate dehydrogenase 3 (NAD+) alpha [Source:ZFIN;Acc:ZDB-GENE-040426-1007]	groupXIX	11973704	11978272	1	1.10036	-0.215214	-0.262401	4.93716	11.2314	0.0105384	0.0303476	6
ENSGACG00000015923	rhcg	Rh family, C glycoprotein (rhcg), mRNA [Source:RefSeq mRNA;Acc:NM_001267646]	groupII	11842600	11848089	1	-2.02008	0.690502	0.274574	-0.683861	11.2297	0.0105463	0.0303687	10
ENSGACG00000017015	mbnl3	muscleblind-like 3 (Drosophila) [Source:ZFIN;Acc:ZDB-GENE-081002-3]	groupIV	5360379	5367647	1	0.0607527	0.433965	-0.150893	3.74315	11.2137	0.0106249	0.0305914	11
ENSGACG00000000246	scg2a	secretogranin II (chromogranin C) a [Source:ZFIN;Acc:ZDB-GENE-030131-8214]	scaffold_175	127469	130825	-1	-0.339049	0.115472	0.345481	6.06627	11.2052	0.0106667	0.0307065	11
ENSGACG00000001509	MSR1	macrophage scavenger receptor 1 [Source:HGNC Symbol;Acc:HGNC:7376]	groupXVI	403151	408474	1	0.140719	-1.7417	1.34597	2.7336	11.2012	0.0106863	0.0307595	9
ENSGACG00000000909	CPNE4	copine IV [Source:HGNC Symbol;Acc:HGNC:2317]	scaffold_157	63330	82115	1	0.0854586	0.430411	0.0430537	4.33992	11.1948	0.0107179	0.0308468	11
ENSGACG00000002011	si:ch211-218d20.15	si:ch211-218d20.15 [Source:ZFIN;Acc:ZDB-GENE-070912-193]	groupXVI	3416058	3419330	-1	0.333166	-0.0947401	-0.139169	4.56535	11.1573	0.0109048	0.0313776	7
ENSGACG00000003551			groupXVII	817933	818885	-1	-0.0738771	-1.20265	1.13342	4.19847	11.1478	0.0109529	0.0315126	12
ENSGACG00000015386	epha4b	eph receptor A4b [Source:ZFIN;Acc:ZDB-GENE-030826-6]	groupIII	7784960	7850927	1	0.00132174	0.36404	-0.133428	6.12571	11.1442	0.0109712	0.0315616	11
ENSGACG00000006038	ZNFX1	zinc finger, NFX1-type containing 1 [Source:HGNC Symbol;Acc:HGNC:29271]	groupXVII	4531155	4544248	-1	0.320742	-0.0999858	0.269671	4.30423	11.1409	0.0109878	0.0316075	7
ENSGACG00000015260	PCDH9	protocadherin 9 [Source:HGNC Symbol;Acc:HGNC:8661]	groupII	6665264	6668296	1	-0.0869798	0.452644	-0.00851758	5.97839	11.1403	0.010991	0.031615	11
ENSGACG00000011606	postnb	periostin, osteoblast specific factor b [Source:ZFIN;Acc:ZDB-GENE-030131-9120]	groupI	13650351	13660833	-1	-0.535411	0.987386	-1.23791	2.45558	11.127	0.0110584	0.0318051	10
ENSGACG00000000155	C3 (1 of 8)	complement component 3 [Source:HGNC Symbol;Acc:HGNC:1318]	scaffold_251	15265	34678	1	1.27213	-1.68174	-0.0210928	2.81068	11.1144	0.0111231	0.0319893	6
ENSGACG00000005825	slc5a2	solute carrier family 5 (sodium/glucose cotransporter), member 2 [Source:ZFIN;Acc:ZDB-GENE-040426-2498]	groupI	2024413	2029617	1	1.0662	-1.2492	0.206854	-0.482654	11.1037	0.0111784	0.0321465	6
ENSGACG00000009050	cmpk2	cytidine monophosphate (UMP-CMP) kinase 2, mitochondrial [Source:ZFIN;Acc:ZDB-GENE-040724-24]	groupXV	6443010	6447046	1	0.744725	-0.0825677	0.491132	2.6149	11.0967	0.0112142	0.032246	7
ENSGACG00000020361	scn4bb	sodium channel, voltage-gated, type IV, beta b [Source:ZFIN;Acc:ZDB-GENE-031116-71]	groupVII	17446833	17449484	1	1.67359	-0.106918	1.95011	-1.62912	11.0921	0.0112382	0.0323114	6
ENSGACG00000000747	erbb3a	v-erb-b2 erythroblastic leukemia viral oncogene homolog 3a [Source:ZFIN;Acc:ZDB-GENE-030916-3]	scaffold_27	2032090	2041981	1	-1.06234	0.509445	-0.531338	1.09538	11.0854	0.0112731	0.0324079	10
ENSGACG00000011977	ppdpfa	pancreatic progenitor cell differentiation and proliferation factor a [Source:ZFIN;Acc:ZDB-GENE-030219-204]	groupXII	15736143	15738244	-1	0.448934	-1.32742	0.722063	2.13894	11.0712	0.0113468	0.0326144	9
ENSGACG00000010034	PCP2	Purkinje cell protein 2 [Source:HGNC Symbol;Acc:HGNC:30209]	groupXI	7791014	7795841	-1	0.271821	-0.94574	-0.582325	1.08321	11.0574	0.0114196	0.0328198	7
ENSGACG00000009554	crym	crystallin, mu [Source:ZFIN;Acc:ZDB-GENE-070112-1782]	groupV	11372152	11374064	-1	0.232152	-0.624064	0.641089	2.58845	11.037	0.0115276	0.033115	7
ENSGACG00000002905	blnk	B-cell linker [Source:ZFIN;Acc:ZDB-GENE-040702-4]	groupVI	2188938	2196270	1	0.223325	-1.45602	0.849936	1.38091	11.0316	0.011556	0.0331947	12
ENSGACG00000009797	pgbd5	piggyBac transposable element derived 5 [Source:ZFIN;Acc:ZDB-GENE-040724-229]	groupVI	11910628	11918855	1	-0.03404	0.420365	-0.129739	5.35502	11.0307	0.0115609	0.033207	11
ENSGACG00000018002			groupIV	10867467	10891677	1	0.32009	-1.13655	-0.0551419	0.870108	10.979	0.01184	0.033995	7
ENSGACG00000002238			groupXVI	4679752	4681582	-1	1.16707	-0.441236	-0.25988	1.90812	10.9759	0.0118567	0.0340392	6
ENSGACG00000019940			groupIX	20065917	20077111	-1	1.53966	-0.0292047	0.0587841	3.62832	10.9503	0.0119979	0.0344369	6
ENSGACG00000012287	zfyve26	zinc finger, FYVE domain containing 26 [Source:ZFIN;Acc:ZDB-GENE-030131-3286]	groupXV	12232184	12252104	1	-0.413171	0.726358	0.327019	4.39921	10.9481	0.0120101	0.034468	11
ENSGACG00000009357	nptx2b	neuronal pentraxin 2b [Source:ZFIN;Acc:ZDB-GENE-110328-1]	groupV	11256608	11259614	1	-1.99421	-1.5753	0.847657	2.49022	10.9339	0.0120888	0.0346917	9
ENSGACG00000006782	zgc:193593	zgc:193593 [Source:ZFIN;Acc:ZDB-GENE-080723-21]	groupXV	3395955	3397738	1	0.164881	-0.840331	-0.317536	2.16917	10.8923	0.0123226	0.0353467	7
ENSGACG00000013451	ccdc85a	coiled-coil domain containing 85A [Source:ZFIN;Acc:ZDB-GENE-080220-55]	scaffold_61	711945	713938	-1	0.208172	0.394532	-0.294143	2.71609	10.888	0.0123472	0.0354151	11
ENSGACG00000005065	nfkbiaa	nuclear factor of kappa light polypeptide gene enhancer in B-cells inhibitor, alpha a [Source:ZFIN;Acc:ZDB-GENE-040426-2227]	groupXVIII	1969540	1972310	-1	-0.0482338	-0.678194	0.35199	3.96726	10.8876	0.0123496	0.0354201	7
ENSGACG00000019995	ppfia2	protein tyrosine phosphatase, receptor type, f polypeptide (PTPRF), interacting protein (liprin), alpha 2 [Source:ZFIN;Acc:ZDB-GENE-030131-7905]	groupIV	31632410	31707854	1	-0.310615	0.145794	-0.140036	6.72347	10.8771	0.0124095	0.0355857	11
ENSGACG00000001289	si:dkey-81h8.1	si:dkey-81h8.1 [Source:ZFIN;Acc:ZDB-GENE-060503-931]	scaffold_130	70192	82136	1	0.520696	-0.152058	0.0167812	5.57535	10.8697	0.0124518	0.035705	7
ENSGACG00000002806	slc12a5b	solute carrier family 12 (potassium/chloride transporter), member 5b [Source:ZFIN;Acc:ZDB-GENE-080707-1]	groupXII	669406	674050	-1	0.0150397	-0.912009	0.245314	2.80946	10.8668	0.0124683	0.0357502	7
ENSGACG00000006619	KIRREL3	kin of IRRE like 3 (Drosophila) [Source:HGNC Symbol;Acc:HGNC:23204]	groupI	3727950	3776112	1	-0.187084	0.453098	-0.100925	4.7175	10.8537	0.0125436	0.0359601	11
ENSGACG00000019921			groupVII	8166832	8167860	-1	-0.318337	0.563416	-0.0406347	2.50572	10.8306	0.0126779	0.0363349	11
ENSGACG00000005476	zgc:91890	zgc:91890 [Source:ZFIN;Acc:ZDB-GENE-040704-21]	groupXX	4085854	4088423	1	-0.0352807	-0.723818	-0.335045	3.51166	10.7991	0.0128633	0.036858	7
ENSGACG00000013054	tap1	transporter 1, ATP-binding cassette, sub-family B (MDR/TAP) [Source:ZFIN;Acc:ZDB-GENE-050517-43]	groupXX	15435937	15442114	-1	-0.0687905	-0.0137316	0.525352	4.39078	10.7948	0.0128886	0.0369283	7
ENSGACG00000016048	wfs1a	Wolfram syndrome 1a (wolframin) [Source:ZFIN;Acc:ZDB-GENE-080225-11]	groupIX	1263151	1268311	1	0.3899	-0.463116	0.490718	3.14411	10.7909	0.0129119	0.0369929	7
ENSGACG00000015589	stat1a	signal transduction and activation of transcription 1a [Source:ZFIN;Acc:ZDB-GENE-980526-499]	groupI	27829942	27837042	1	0.0441033	-0.474798	0.544447	5.71687	10.7579	0.0131097	0.0375532	7
ENSGACG00000000489	si:ch211-152p11.4	si:ch211-152p11.4 [Source:ZFIN;Acc:ZDB-GENE-060503-764]	scaffold_101	150196	155270	-1	-0.793847	0.512104	0.186777	2.02963	10.7432	0.0131986	0.0378036	10
ENSGACG00000018117	phpt1	phosphohistidine phosphatase 1 [Source:ZFIN;Acc:ZDB-GENE-040801-85]	groupXIV	11289169	11291245	-1	0.0588425	-0.0150647	-0.526616	4.63768	10.7353	0.0132466	0.0379326	7
ENSGACG00000018516			groupIX	12782664	12786527	-1	0.459174	-1.37027	-0.772647	0.267268	10.7354	0.013246	0.0379326	6
ENSGACG00000002482	CHAT (1 of 2)	choline O-acetyltransferase [Source:HGNC Symbol;Acc:HGNC:1912]	groupV	1052048	1059304	1	-1.67272	-1.09253	1.13205	0.785381	10.7352	0.0132476	0.0379331	9
ENSGACG00000007080	ndufa4	NADH dehydrogenase (ubiquinone) 1 alpha subcomplex, 4 [Source:ZFIN;Acc:ZDB-GENE-040426-1962]	groupV	9294683	9296160	-1	-0.354735	0.199811	-0.0291473	6.98799	10.7318	0.0132684	0.0379885	11
ENSGACG00000018999	CC2D1A	coiled-coil and C2 domain containing 1A [Source:HGNC Symbol;Acc:HGNC:30237]	groupIX	15105705	15116132	-1	-0.32943	0.631656	-0.0594455	5.31453	10.7031	0.0134448	0.0384847	11
ENSGACG00000007534	got1	glutamic-oxaloacetic transaminase 1, soluble [Source:ZFIN;Acc:ZDB-GENE-040426-2003]	groupVI	8807677	8811830	-1	0.554629	-0.474989	0.825718	3.73383	10.7012	0.0134564	0.0385138	12
ENSGACG00000011206	mn1b	meningioma 1b [Source:ZFIN;Acc:ZDB-GENE-080917-23]	groupXIII	12638814	12652820	-1	0.0380462	0.325208	-0.149237	7.12659	10.6896	0.0135284	0.038711	11
ENSGACG00000000464	tat	tyrosine aminotransferase [Source:ZFIN;Acc:ZDB-GENE-030131-1144]	scaffold_163	104983	110801	1	-1.36406	-1.02707	0.762154	1.74045	10.6848	0.0135581	0.0387915	9
ENSGACG00000016405	isl2b	islet2b [Source:ZFIN;Acc:ZDB-GENE-990415-133]	groupII	15167459	15172100	1	1.79433	0.00537328	-0.246799	0.292108	10.6699	0.0136518	0.0390531	6
ENSGACG00000019340	chst11	carbohydrate (chondroitin 4) sulfotransferase 11 [Source:ZFIN;Acc:ZDB-GENE-040315-1]	groupIV	24262691	24277902	-1	-0.0851163	0.553063	-0.138188	2.91077	10.6589	0.0137211	0.0392423	11
ENSGACG00000004779	trmt61a	tRNA methyltransferase 61 homolog A (S. cerevisiae) [Source:ZFIN;Acc:ZDB-GENE-040718-5]	groupXV	889276	897659	1	0.417322	0.389793	0.421602	2.68618	10.655	0.0137453	0.0393094	7
ENSGACG00000015958	irf8	interferon regulatory factor 8 [Source:ZFIN;Acc:ZDB-GENE-040718-367]	groupII	12097880	12101467	-1	-0.205737	-1.55051	1.02489	3.73585	10.6466	0.0137984	0.0394591	9
ENSGACG00000014124			groupXI	14371005	14373327	1	-0.0569575	0.310402	-0.196775	5.64517	10.6333	0.0138836	0.0397004	11
ENSGACG00000002771	IMPG2 (1 of 2)	interphotoreceptor matrix proteoglycan 2 [Source:HGNC Symbol;Acc:HGNC:18362]	groupXVI	6582867	6593455	1	0.924198	-0.549786	-0.330663	1.66995	10.627	0.0139236	0.0398124	6
ENSGACG00000014315	ccl19	chemokine (C-C motif) ligand 19 [Source:ZFIN;Acc:ZDB-GENE-091204-19]	groupXIII	18789994	18791021	-1	-1.77961	-2.64271	2.23617	1.28077	10.6184	0.0139789	0.0399662	2
ENSGACG00000013255	MYT1L (2 of 2)	myelin transcription factor 1-like [Source:HGNC Symbol;Acc:HGNC:7623]	groupXV	15759319	15781086	-1	-0.00796189	0.333891	0.0513539	4.92247	10.6112	0.0140249	0.0400932	11
ENSGACG00000015635	sox6	SRY-box containing gene 6 [Source:ZFIN;Acc:ZDB-GENE-081120-6]	groupII	9549115	9622574	1	-0.0860636	0.449924	-0.0850096	3.73481	10.6047	0.014067	0.0402111	11
ENSGACG00000013846	tal1	T-cell acute lymphocytic leukemia 1 [Source:ZFIN;Acc:ZDB-GENE-980526-501]	groupIII	2152790	2154924	-1	0.455978	0.074241	1.43712	0.471955	10.5782	0.0142397	0.0406935	12
ENSGACG00000006559	st3gal4	ST3 beta-galactoside alpha-2,3-sialyltransferase 4 [Source:ZFIN;Acc:ZDB-GENE-050309-174]	groupI	3352438	3368132	1	-0.221819	-0.518426	0.128227	4.37155	10.5771	0.0142471	0.0407123	7
ENSGACG00000010667	abcg8	ATP-binding cassette, sub-family G (WHITE), member 8 [Source:ZFIN;Acc:ZDB-GENE-050517-41]	groupVI	13374118	13380352	1	0.118063	3.75389	0.0893459	-1.34463	10.5386	0.0145011	0.041431	8
ENSGACG00000013825	pde4a	phosphodiesterase 4A, cAMP-specific [Source:ZFIN;Acc:ZDB-GENE-131125-7]	groupXI	13554864	13565422	1	-0.122757	0.30126	0.0337172	5.78825	10.5212	0.0146174	0.0417563	11
ENSGACG00000004949			groupXXI	10639495	10643086	1	0.79329	-0.122176	0.557918	3.56001	10.5197	0.0146279	0.0417838	7
ENSGACG00000020315	PCDHGC5 (2 of 2)	protocadherin gamma subfamily C, 5 [Source:HGNC Symbol;Acc:HGNC:8718]	groupVII	16829719	16845611	1	-0.0508306	0.331619	-0.129194	8.02713	10.5076	0.0147091	0.042011	11
ENSGACG00000012752	crybb2	crystallin, beta B2 [Source:ZFIN;Acc:ZDB-GENE-060130-1]	groupXIII	14810916	14812259	1	3.44165	-3.52449	-1.61174	-1.49416	10.5071	0.0147131	0.04202	6
ENSGACG00000009895	cmya5	cardiomyopathy associated 5 [Source:ZFIN;Acc:ZDB-GENE-070630-1]	groupXIII	9670982	9678459	-1	0.181078	-0.581257	1.514	0.0274277	10.5066	0.0147159	0.0420257	12
ENSGACG00000001123			scaffold_129	47228	50569	-1	-0.120746	-0.972336	1.26754	4.68488	10.4977	0.0147767	0.0421946	12
ENSGACG00000015578	sord	sorbitol dehydrogenase [Source:ZFIN;Acc:ZDB-GENE-040426-1231]	groupII	9204468	9207737	1	0.148434	-0.392909	0.110803	3.64579	10.4933	0.0148066	0.0422729	7
ENSGACG00000000022	matn4	matrilin 4 [Source:ZFIN;Acc:ZDB-GENE-050208-64]	scaffold_89	230109	238032	-1	-0.137797	-1.40262	0.484379	0.138051	10.4175	0.0153311	0.0437456	9
ENSGACG00000011843	cdh11	cadherin 11, osteoblast [Source:ZFIN;Acc:ZDB-GENE-980526-170]	groupVI	16066094	16083294	1	-0.233262	0.327125	0.0562758	5.75401	10.3989	0.0154628	0.0441138	11
ENSGACG00000017982	aldob	aldolase b, fructose-bisphosphate [Source:ZFIN;Acc:ZDB-GENE-030131-383]	groupIV	10687390	10690122	1	0.468299	-0.835544	-0.322014	4.0526	10.3846	0.0155646	0.0444017	6
ENSGACG00000011600	myh14	myosin, heavy chain 14, non-muscle [Source:ZFIN;Acc:ZDB-GENE-100921-1]	groupXX	12528767	12547852	-1	-0.090644	0.343	-0.0576657	6.15242	10.3833	0.0155737	0.0444252	11
ENSGACG00000019845	uhrf1bp1l	UHRF1 (ICBP90) binding protein 1-like [Source:ZFIN;Acc:ZDB-GENE-041210-177]	groupIV	30867908	30890504	-1	-0.179453	0.229633	-0.0409017	5.52675	10.375	0.0156335	0.0445808	11
ENSGACG00000006047	cad	carbamoyl-phosphate synthetase 2, aspartate transcarbamylase, and dihydroorotase [Source:ZFIN;Acc:ZDB-GENE-021030-4]	groupXVIII	3262716	3282550	1	0.360302	0.174119	0.530217	4.60646	10.3709	0.015663	0.0446623	7
ENSGACG00000019043	pycr1a	pyrroline-5-carboxylate reductase 1a [Source:ZFIN;Acc:ZDB-GENE-040426-1675]	groupIX	15241216	15246931	-1	-0.224816	0.322291	0.13341	3.70992	10.3677	0.0156857	0.0447244	11
ENSGACG00000011655	scml4	sex comb on midleg-like 4 (Drosophila) [Source:ZFIN;Acc:ZDB-GENE-041210-338]	groupXV	11423644	11426835	1	-0.0783619	0.264827	-0.37363	5.19403	10.3618	0.0157285	0.044839	11
ENSGACG00000000095			scaffold_527	10528	11476	-1	-0.500212	-2.18865	3.25271	-1.54156	10.3599	0.0157422	0.0448731	2
ENSGACG00000016949	hspb15	heat shock protein, alpha-crystallin-related, b15 [Source:ZFIN;Acc:ZDB-GENE-080214-5]	groupXIV	6508337	6510005	-1	-0.56005	-0.662289	0.392517	5.55463	10.3486	0.015824	0.0451035	7
ENSGACG00000009188			groupXVII	8810502	8815093	1	0.571098	-0.962619	1.39776	2.78653	10.3244	0.0160005	0.0456016	12
ENSGACG00000009662			groupX	14795391	14808405	-1	1.39258	-0.435838	0.626873	-0.253157	10.3192	0.016039	0.0457061	6
ENSGACG00000012646	eml2	echinoderm microtubule associated protein like 2 [Source:ZFIN;Acc:ZDB-GENE-050706-71]	groupI	16354945	16372843	-1	0.175505	-0.456844	-0.297374	7.66614	10.3165	0.0160587	0.0457597	7
ENSGACG00000013859	zc3h12a	zinc finger CCCH-type containing 12A [Source:ZFIN;Acc:ZDB-GENE-110411-6]	groupXX	17700261	17704760	1	0.0471192	-0.988317	0.628852	2.2153	10.3131	0.016084	0.045824	12
ENSGACG00000011740			groupI	13928378	13929303	1	-3.66479	1.36855	-1.09881	-1.63818	10.2992	0.0161866	0.0461061	5
ENSGACG00000004828	prr12b	proline rich 12b [Source:ZFIN;Acc:ZDB-GENE-130625-2]	groupXI	406551	420747	-1	0.066804	0.325437	-0.114655	7.13065	10.2942	0.0162241	0.046205	11
ENSGACG00000018021	alad	aminolevulinate dehydratase [Source:ZFIN;Acc:ZDB-GENE-050417-123]	groupXIV	10781663	10786748	-1	0.0588666	-0.281052	0.342202	3.82494	10.2712	0.0163962	0.0466819	7
ENSGACG00000013900	fgf12a	fibroblast growth factor 12a [Source:ZFIN;Acc:ZDB-GENE-050221-6]	groupIII	2197146	2224845	1	0.416001	0.147895	0.173511	3.54473	10.2626	0.0164609	0.046861	7
ENSGACG00000004902	loxl3b	lysyl oxidase-like 3b [Source:ZFIN;Acc:ZDB-GENE-030131-8210]	groupXV	1315297	1327503	1	0.654875	0.133586	-0.178861	2.61255	10.2579	0.0164963	0.0469565	7
ENSGACG00000005480	slc12a5a	solute carrier family 12 (potassium/chloride transporter), member 5a [Source:ZFIN;Acc:ZDB-GENE-120927-3]	groupXVII	3715493	3747480	-1	-0.077287	0.425113	0.0946054	7.24103	10.2531	0.0165325	0.047054	11
ENSGACG00000019401	TNRC6C (2 of 2)	trinucleotide repeat containing 6C [Source:HGNC Symbol;Acc:HGNC:29318]	groupIX	17270999	17292017	1	-0.135908	0.492848	-0.00495568	5.16753	10.249	0.0165637	0.0471404	11
ENSGACG00000009898	ace	angiotensin I converting enzyme (peptidyl-dipeptidase A) 1 [Source:ZFIN;Acc:ZDB-GENE-030131-1826]	groupV	11674619	11688534	-1	-0.238261	0.471634	-0.0754484	3.76701	10.2449	0.0165948	0.0472233	11
ENSGACG00000016928	PRODH	proline dehydrogenase (oxidase) 1 [Source:HGNC Symbol;Acc:HGNC:9453]	groupXIV	6433673	6440019	1	-0.398415	-0.50652	0.33027	5.63781	10.2438	0.0166035	0.0472456	7
ENSGACG00000012385	mfsd2b	major facilitator superfamily domain containing 2B [Source:ZFIN;Acc:ZDB-GENE-041210-308]	groupXVIII	13772879	13784829	-1	0.0679873	-0.508029	0.271301	3.44366	10.2211	0.0167771	0.0477235	7
ENSGACG00000004331	pank4	pantothenate kinase 4 [Source:ZFIN;Acc:ZDB-GENE-040426-1592]	groupXVII	1863609	1869407	1	0.24481	-0.258122	0.143759	6.36143	10.2044	0.0169061	0.0480822	7
ENSGACG00000019119	faah2b (2 of 2)	fatty acid amide hydrolase 2b [Source:ZFIN;Acc:ZDB-GENE-061027-358]	groupVII	2726309	2733138	1	0.280827	-0.298956	0.0283956	5.12711	10.1978	0.0169574	0.0482228	7
ENSGACG00000007142	prdm8	PR domain containing 8 [Source:ZFIN;Acc:ZDB-GENE-040426-2747]	groupVI	8321996	8323887	-1	0.0110756	0.589944	-0.463667	1.74373	10.1943	0.0169846	0.0482975	11
ENSGACG00000013529	ppp1caa	protein phosphatase 1, catalytic subunit, alpha isoform a [Source:ZFIN;Acc:ZDB-GENE-040516-3]	groupXI	13273176	13279635	-1	0.0439394	0.227123	0.250299	6.1726	10.1645	0.0172184	0.0489566	11
ENSGACG00000007197	GRIN2B (1 of 2)	glutamate receptor, ionotropic, N-methyl D-aspartate 2B [Source:HGNC Symbol;Acc:HGNC:4586]	groupXI	3962795	4020708	-1	0.025031	0.538281	0.128898	7.16524	10.1505	0.0173293	0.0492554	11
ENSGACG00000018805	dak	dihydroxyacetone kinase 2 homolog (S. cerevisiae) [Source:ZFIN;Acc:ZDB-GENE-060929-652]	groupVII	1144794	1149892	-1	0.175124	-0.352872	0.321243	3.60521	10.1496	0.0173362	0.0492723	7
ENSGACG00000017305	FYB	FYN binding protein [Source:HGNC Symbol;Acc:HGNC:4036]	groupXIV	7304055	7314207	1	0.158996	-1.24196	1.02824	4.15192	10.1375	0.0174324	0.0495377	12
ENSGACG00000010675	igsf9ba (2 of 2)	immunoglobulin superfamily, member 9Ba [Source:ZFIN;Acc:ZDB-GENE-060503-729]	groupI	11135265	11149842	1	-0.100805	0.405343	-0.195265	4.17214	10.127	0.0175168	0.0497687	11
ENSGACG00000011457	SMC6	structural maintenance of chromosomes 6 [Source:HGNC Symbol;Acc:HGNC:20466]	groupXVIII	11693835	11703972	1	-0.304343	0.202489	0.152999	4.52653	10.1216	0.01756	0.0498886	11
ENSGACG00000001756			scaffold_172	30858	31670	1	3.14648	-2.37395	-0.691909	-1.33466	10.1203	0.0175709	0.0499168	6
ENSGACG00000002672	tfap2e	transcription factor AP-2 epsilon [Source:ZFIN;Acc:ZDB-GENE-040426-1455]	groupX	2650823	2657474	1	0.472133	-1.45617	2.1194	-1.01569	10.1178	0.0175907	0.0499704	12
ENSGACG00000001767	TRIM14 (35 of 76)	tripartite motif containing 14 [Source:HGNC Symbol;Acc:HGNC:16283]	scaffold_310	11953	12480	1	-0.183336	-1.80141	0.338586	-0.210051	10.1169	0.0175978	0.0499876	9
ENSGACG00000018866			groupVII	1446415	1448832	-1	0.0615489	-1.51269	0.882658	0.626457	10.1149	0.0176143	0.0500318	12
ENSGACG00000002618	nop16 (1 of 4)	NOP16 nucleolar protein homolog (yeast) [Source:ZFIN;Acc:ZDB-GENE-040718-267]	groupVI	1041607	1044896	1	0.325614	0.0312951	-0.608541	3.44495	10.1111	0.0176453	0.0501125	7
ENSGACG00000016479	zgc:63568	zgc:63568 [Source:ZFIN;Acc:ZDB-GENE-040426-1165]	groupIV	1795282	1798778	1	0.189329	-0.436406	1.24862	1.3576	10.111	0.0176457	0.0501125	12
ENSGACG00000005172	anxa13	annexin A13 [Source:ZFIN;Acc:ZDB-GENE-010406-1]	groupXXI	11058258	11061418	-1	-0.210921	0.22861	-0.239023	6.71435	10.1001	0.0177341	0.0503495	11
ENSGACG00000014409	rnf213b	ring finger protein 213b [Source:ZFIN;Acc:ZDB-GENE-110822-1]	scaffold_112	156020	178413	-1	0.268874	-0.308046	0.713086	3.43086	10.0928	0.0177938	0.0505133	7
ENSGACG00000014535	cyp2n13	cytochrome P450, family 2, subfamily N, polypeptide 13 [Source:ZFIN;Acc:ZDB-GENE-041001-158]	groupVIII	19106719	19119924	1	0.536342	-0.40367	1.46202	-0.0505512	10.0887	0.0178268	0.0505983	12
ENSGACG00000002887	qars	glutaminyl-tRNA synthetase [Source:ZFIN;Acc:ZDB-GENE-040426-1011]	groupXII	875642	881378	-1	-0.180691	-0.223618	0.339224	4.38227	10.0687	0.0179912	0.0510477	7
ENSGACG00000018706			groupIX	13930692	13931775	-1	2.03208	-2.58384	0.0698888	0.266358	10.0655	0.0180174	0.0511193	6
ENSGACG00000017889			groupIX	8806378	8808455	-1	-1.13893	-0.856949	0.253531	1.76948	10.0574	0.0180843	0.0513004	9
ENSGACG00000019545	MSLN	mesothelin [Source:HGNC Symbol;Acc:HGNC:7371]	groupIX	18061908	18068860	1	-1.4915	0.747559	-0.0284024	-0.371165	10.0554	0.0181011	0.0513451	10
ENSGACG00000018567			groupVII	160486	163129	-1	0.120608	-1.40177	0.427153	-0.0872254	10.0432	0.0182025	0.0516211	9
ENSGACG00000014749			scaffold_1036	2367	5411	-1	-0.145195	0.867537	0.653828	0.123247	10.0393	0.0182349	0.0517045	11
ENSGACG00000008055	si:ch211-256m1.8 (2 of 4)	si:ch211-256m1.8 [Source:ZFIN;Acc:ZDB-GENE-131127-417]	groupXI	5020850	5021746	-1	-2.87485	-4.44354	1.9119	-1.36061	10.034	0.0182797	0.0518286	4
ENSGACG00000016734	ANKRD50	ankyrin repeat domain 50 [Source:HGNC Symbol;Acc:HGNC:29223]	groupIV	3512927	3533277	-1	0.0516789	0.325225	-0.199708	5.67256	10.0315	0.0183007	0.0518792	11
ENSGACG00000003186	spice1	spindle and centriole associated protein 1 [Source:ZFIN;Acc:ZDB-GENE-041212-64]	groupXXI	7677215	7682182	1	-1.08665	0.293928	-0.149336	2.99585	10.0281	0.0183289	0.0519536	10
ENSGACG00000006975	cntn3a.1	contactin 3a, tandem duplicate 1 [Source:ZFIN;Acc:ZDB-GENE-081030-10]	groupXII	8923483	8966616	-1	-0.0523736	0.368129	0.0618423	6.33949	10.0236	0.0183667	0.0520578	11
ENSGACG00000009976	keap1a	kelch-like ECH-associated protein 1a [Source:ZFIN;Acc:ZDB-GENE-030131-556]	groupXV	8234896	8246409	1	0.217153	-0.354749	0.134993	3.90544	10.021	0.0183883	0.052116	7
ENSGACG00000012662	arhgef10lb	Rho guanine nucleotide exchange factor (GEF) 10-like b [Source:ZFIN;Acc:ZDB-GENE-090313-222]	groupXII	16676928	16692542	1	0.349648	-1.28977	0.544935	1.87355	10.0024	0.0185457	0.0525503	9
ENSGACG00000013631	zgc:110789 (2 of 2)	zgc:110789 [Source:ZFIN;Acc:ZDB-GENE-050306-38]	groupXIX	18634336	18638892	-1	-0.0884056	-1.16227	0.968228	1.53439	10.0023	0.018547	0.052551	12
ENSGACG00000008077	ptprk	protein tyrosine phosphatase, receptor type, K [Source:ZFIN;Acc:ZDB-GENE-030131-9834]	groupXVIII	7308267	7357805	1	-0.0963396	0.358377	-0.0765052	7.29689	10.0015	0.0185533	0.0525659	11
ENSGACG00000001606			scaffold_106	73669	137197	1	-0.384672	0.674158	0.344473	5.24196	9.9932	0.018624	0.0527603	11
ENSGACG00000020094	prkcq	protein kinase C, theta [Source:ZFIN;Acc:ZDB-GENE-041210-195]	groupIV	32510967	32523662	-1	-1.20114	-0.552835	0.965737	0.946404	9.98843	0.0186648	0.05287	12
ENSGACG00000007933	C4B	complement component 4B (Chido blood group) [Source:HGNC Symbol;Acc:HGNC:1324]	groupXX	9276661	9289490	-1	0.443397	-0.826213	1.01348	5.33913	9.98631	0.0186829	0.0529183	12
ENSGACG00000001534	adhfe1	alcohol dehydrogenase, iron containing, 1 [Source:ZFIN;Acc:ZDB-GENE-040426-2070]	scaffold_120	95125	103663	1	0.427996	0.343728	0.354993	4.21543	9.96774	0.0188424	0.0533521	7
ENSGACG00000001998	shox	short stature homeobox [Source:ZFIN;Acc:ZDB-GENE-051030-21]	groupXVI	3301653	3308807	-1	0.847122	-0.516124	3.9591	-1.64963	9.95752	0.0189307	0.0535963	2
ENSGACG00000000274	TTN	titin [Source:HGNC Symbol;Acc:HGNC:12403]	scaffold_69	196695	364852	-1	-0.206119	1.16478	0.185639	1.4713	9.95212	0.0189776	0.0537258	11
ENSGACG00000012376	chmp7	CHMP family, member 7 [Source:ZFIN;Acc:ZDB-GENE-040426-1750]	groupXIII	14423967	14427196	-1	-0.00303752	-0.214206	0.298562	5.5665	9.95074	0.0189895	0.0537567	7
ENSGACG00000012167	lgmn	legumain [Source:ZFIN;Acc:ZDB-GENE-021030-1]	groupXV	12139892	12145795	1	0.121254	-0.37062	0.169887	5.39557	9.93276	0.0191465	0.0541949	7
ENSGACG00000014777	socs7	suppressor of cytokine signaling 7 [Source:ZFIN;Acc:ZDB-GENE-080204-125]	groupXI	15885037	15887971	1	-0.166401	-0.0543842	0.699373	3.95291	9.93006	0.0191701	0.0542587	7
ENSGACG00000005049			groupVIII	3798130	3799410	-1	2.2847	-2.06525	-0.103748	1.07125	9.927	0.019197	0.0543318	6
ENSGACG00000005895	gabbr2	gamma-aminobutyric acid (GABA) B receptor, 2 [Source:ZFIN;Acc:ZDB-GENE-060503-620]	groupX	8485326	8571015	1	0.0490228	0.392316	0.0615342	6.03452	9.92299	0.0192322	0.0544243	11
ENSGACG00000014923	col5a2b	collagen, type V, alpha 2b [Source:ZFIN;Acc:ZDB-GENE-110406-2]	scaffold_74	197753	208954	-1	-0.477132	-0.264323	-0.128417	4.22873	9.92291	0.0192329	0.0544243	7
ENSGACG00000011602	LAMB3	laminin, beta 3 [Source:HGNC Symbol;Acc:HGNC:6490]	groupXVII	12652011	12662065	-1	1.46843	1.85016	0.00999342	0.336239	9.9143	0.0193089	0.0546271	8
ENSGACG00000000188			scaffold_1318	4364	5126	-1	-0.300131	-1.81638	-1.33612	0.130302	9.9115	0.0193336	0.054694	9
ENSGACG00000011969	st6galnac5b	ST6 (alpha-N-acetyl-neuraminyl-2,3-beta-galactosyl-1,3)-N-acetylgalactosaminide alpha-2,6-sialyltransferase 5b [Source:ZFIN;Acc:ZDB-GENE-040912-25]	groupVIII	15272974	15285593	-1	0.340468	0.162987	0.15364	4.59186	9.90329	0.0194063	0.0548967	7
ENSGACG00000001336	kcnb1	potassium voltage-gated channel, Shab-related subfamily, member 1 [Source:ZFIN;Acc:ZDB-GENE-090831-3]	scaffold_27	3843351	3862320	1	-0.111081	0.402283	-0.0520738	4.78803	9.89785	0.0194547	0.0550273	11
ENSGACG00000000546			scaffold_229	6997	8223	1	-0.589609	1.45108	1.60612	2.23789	9.88138	0.0196019	0.0554312	8
ENSGACG00000007077	sst3	somatostatin 3 [Source:ZFIN;Acc:ZDB-GENE-030813-3]	groupXII	9114925	9116176	1	-0.251438	-0.399182	-0.0697962	8.15809	9.87944	0.0196192	0.0554771	7
ENSGACG00000009353	mao	monoamine oxidase [Source:ZFIN;Acc:ZDB-GENE-040329-3]	groupXVI	18090430	18105144	1	0.166782	-0.239676	-0.0999927	5.21265	9.86025	0.0197922	0.0559632	7
ENSGACG00000016909	UACA	uveal autoantigen with coiled-coil domains and ankyrin repeats [Source:HGNC Symbol;Acc:HGNC:15947]	groupII	18755567	18770424	1	-0.391943	0.0512118	0.0401977	5.35066	9.85853	0.0198078	0.0560009	11
ENSGACG00000014325	cep135	centrosomal protein 135 [Source:ZFIN;Acc:ZDB-GENE-041210-325]	groupVIII	18785761	18791670	1	0.186327	-0.282176	-0.178978	4.63556	9.85613	0.0198296	0.0560594	7
ENSGACG00000019933			groupVII	8628159	8630699	1	-0.288677	0.103937	1.33937	1.72487	9.85081	0.0198778	0.0561927	12
ENSGACG00000008845	grhl1	grainyhead-like 1 (Drosophila) [Source:ZFIN;Acc:ZDB-GENE-030131-3665]	groupXV	6080714	6092164	-1	-1.09823	0.418502	-0.160285	1.15095	9.83914	0.0199842	0.056484	10
ENSGACG00000017695	nefma	neurofilament, medium polypeptide a [Source:ZFIN;Acc:ZDB-GENE-050522-205]	groupXIV	8935776	8950786	-1	1.43457	-0.243143	0.795043	3.01409	9.8348	0.0200239	0.0565897	6
ENSGACG00000016274	RIN2 (2 of 2)	Ras and Rab interactor 2 [Source:HGNC Symbol;Acc:HGNC:18750]	groupIX	2261568	2267495	-1	0.655968	0.110271	1.08728	2.28472	9.83413	0.02003	0.056604	12
ENSGACG00000007031	FKBP14 (1 of 2)	FK506 binding protein 14, 22 kDa [Source:HGNC Symbol;Acc:HGNC:18625]	groupX	9735093	9737437	-1	0.0758419	1.464	-1.40015	-0.757246	9.81546	0.0202017	0.0570795	10
ENSGACG00000018591			groupVII	208410	211478	1	0.876507	-0.569191	-0.689088	1.92795	9.80877	0.0202636	0.0572514	6
ENSGACG00000018303	KRT23 (2 of 2)	keratin 23 (histone deacetylase inducible) [Source:HGNC Symbol;Acc:HGNC:6438]	groupIX	10934122	10939022	1	-2.08586	0.582704	-0.125855	1.111	9.80633	0.0202862	0.057312	10
ENSGACG00000019597			groupIX	18440029	18440714	1	0.18203	-2.40587	0.733971	-0.6907	9.79208	0.0204188	0.0576833	9
ENSGACG00000020313	pcdh1a	protocadherin 1a [Source:ZFIN;Acc:ZDB-GENE-091116-32]	groupVII	16703180	16706782	-1	-0.120415	0.322277	-0.115102	5.99119	9.78438	0.0204908	0.0578801	11
ENSGACG00000006456			groupXVII	5282637	5335165	-1	0.231168	-0.566148	0.441134	1.6905	9.77661	0.0205637	0.0580731	7
ENSGACG00000006753	arhgef10 (1 of 2)	Rho guanine nucleotide exchange factor (GEF) 10 [Source:ZFIN;Acc:ZDB-GENE-030131-6210]	groupXV	3243115	3253633	-1	-0.0313966	-0.28402	0.385765	2.67692	9.76936	0.0206319	0.0582561	7
ENSGACG00000009087	impg1b	interphotoreceptor matrix proteoglycan 1b [Source:ZFIN;Acc:ZDB-GENE-101007-1]	groupXV	6848071	6861496	-1	1.12824	-2.57181	-0.19177	-1.06403	9.76531	0.0206702	0.0583608	6
ENSGACG00000003346	inpp5f	inositol polyphosphate-5-phosphatase F [Source:ZFIN;Acc:ZDB-GENE-041111-194]	groupVI	2925683	2934870	-1	0.239694	0.00426885	-0.149732	5.61819	9.76219	0.0206996	0.0584375	7
ENSGACG00000012635			groupXV	13199807	13202626	1	-0.00139465	-0.178099	0.245218	5.87032	9.76114	0.0207096	0.0584622	7
ENSGACG00000006241	bpifcl	BPI fold containing family C, like [Source:ZFIN;Acc:ZDB-GENE-070912-360]	groupXII	7629631	7634937	-1	-0.26938	-1.75203	1.0244	2.83698	9.74394	0.020873	0.0589169	9
ENSGACG00000004322	HES5 (4 of 9)	hes family bHLH transcription factor 5 [Source:HGNC Symbol;Acc:HGNC:19764]	groupXVII	1843067	1843668	1	-0.337251	0.66954	1.52478	-0.743494	9.72588	0.0210459	0.0593984	12
ENSGACG00000012452	IL16	interleukin 16 [Source:HGNC Symbol;Acc:HGNC:5980]	scaffold_98	60461	99524	1	0.831177	-0.162498	0.413269	2.11851	9.72466	0.0210576	0.0594281	7
ENSGACG00000003391	grpr (1 of 2)	gastrin-releasing peptide receptor [Source:ZFIN;Acc:ZDB-GENE-081015-4]	groupXVI	7707054	7709592	1	-2.13506	-0.606434	1.12859	0.419404	9.7098	0.021201	0.0598229	9
ENSGACG00000004965	rab25a	RAB25, member RAS oncogene family a [Source:ZFIN;Acc:ZDB-GENE-041212-69]	groupX	7477373	7480027	1	-2.28776	1.87318	-0.957843	-1.53642	9.70853	0.0212133	0.0598543	8
ENSGACG00000000137	psmb9a (3 of 5)	proteasome (prosome, macropain) subunit, beta type, 9a [Source:ZFIN;Acc:ZDB-GENE-990415-140]	scaffold_58	980864	982668	-1	-0.670732	-0.553541	1.88681	-0.0254452	9.69741	0.0213214	0.0601526	12
ENSGACG00000006149	CDO1	cysteine dioxygenase type 1 [Source:HGNC Symbol;Acc:HGNC:1795]	groupXIII	4621043	4625012	-1	0.0663063	-0.650781	0.615404	4.30401	9.69749	0.0213207	0.0601526	7
ENSGACG00000002398	cry3	cryptochrome 3 [Source:ZFIN;Acc:ZDB-GENE-010426-6]	groupXIX	1002682	1016637	-1	0.455645	0.535051	0.00711661	4.11662	9.68612	0.0214316	0.0604566	7
ENSGACG00000020314	PCDHGC3 (4 of 4)	protocadherin gamma subfamily C, 3 [Source:HGNC Symbol;Acc:HGNC:8716]	groupVII	16804232	16815940	1	0.0167087	0.248508	-0.207956	5.06268	9.68017	0.0214899	0.0606178	11
ENSGACG00000018487	cyfip2	cytoplasmic FMR1 interacting protein 2 [Source:ZFIN;Acc:ZDB-GENE-080724-2]	groupIV	14529767	14543116	1	-0.0149112	0.295329	-0.161646	6.97403	9.66572	0.0216322	0.0610054	11
ENSGACG00000018966			groupIX	15034280	15040459	1	-0.0225342	-2.93539	0.513551	0.0277024	9.66271	0.0216619	0.0610859	9
ENSGACG00000014264	dhcr7	7-dehydrocholesterol reductase [Source:ZFIN;Acc:ZDB-GENE-030912-9]	groupII	2319783	2325710	1	-0.108891	-0.418925	-0.288068	3.25358	9.65814	0.0217071	0.0612032	7
ENSGACG00000005780	PKP4 (1 of 2)	plakophilin 4 [Source:HGNC Symbol;Acc:HGNC:9026]	groupXVI	11095735	11137714	-1	0.10586	-0.0184225	-0.324883	5.19414	9.65548	0.0217335	0.0612639	7
ENSGACG00000003784	oclnb	occludin b [Source:ZFIN;Acc:ZDB-GENE-041212-43]	groupXIII	1053570	1058934	-1	-2.09232	0.71281	-0.192615	-1.18562	9.65169	0.0217712	0.0613668	10
ENSGACG00000005713	si:dkey-72l14.3	si:dkey-72l14.3 [Source:ZFIN;Acc:ZDB-GENE-060526-332]	groupXII	6849829	6852340	-1	-0.0640692	-3.70813	1.41366	0.321554	9.61903	0.0220983	0.0622712	4
ENSGACG00000002696	EPHA10	EPH receptor A10 [Source:HGNC Symbol;Acc:HGNC:19987]	groupX	2923308	3005703	1	-0.229586	0.245191	0.164518	4.48907	9.59573	0.0223345	0.0629158	11
ENSGACG00000005326	TMEM87B	transmembrane protein 87B [Source:HGNC Symbol;Acc:HGNC:25913]	groupVI	6286183	6292232	1	-0.69062	-0.0799541	0.314339	4.9782	9.58829	0.0224104	0.0631156	7
ENSGACG00000014891			groupXI	16252563	16254158	-1	-2.38247	0.762956	-0.285205	-0.956631	9.5879	0.0224144	0.0631235	10
ENSGACG00000002247	SLC9A1 (1 of 2)	solute carrier family 9, subfamily A (NHE1, cation proton antiporter 1), member 1 [Source:HGNC Symbol;Acc:HGNC:11071]	groupX	1598669	1606704	-1	0.166223	0.0620565	-0.282471	4.359	9.58596	0.0224343	0.0631758	7
ENSGACG00000017782	rhbg	Rhesus blood group, B glycoprotein [Source:ZFIN;Acc:ZDB-GENE-030131-9542]	scaffold_137	240288	248932	1	-2.10703	-0.853035	-0.266452	-0.278611	9.58207	0.0224741	0.063281	9
ENSGACG00000013676	mycbp	c-myc binding protein [Source:ZFIN;Acc:ZDB-GENE-060331-97]	groupXX	16965623	16968010	-1	0.309112	-0.770796	0.304611	0.529616	9.58169	0.022478	0.0632884	7
ENSGACG00000001136			scaffold_146	4927	5878	-1	0.858939	0.562128	0.108504	3.13861	9.58044	0.0224908	0.063321	7
ENSGACG00000016788	DCAF8	DDB1 and CUL4 associated factor 8 [Source:HGNC Symbol;Acc:HGNC:24891]	groupIII	11810330	11813930	1	-0.352353	0.027644	-0.0876002	5.16079	9.56599	0.0226396	0.0637151	11
ENSGACG00000020266	aspa	aspartoacylase [Source:ZFIN;Acc:ZDB-GENE-080204-11]	groupVII	15227558	15234735	-1	-0.255941	-0.448764	-0.147722	4.60797	9.56334	0.022667	0.0637849	7
ENSGACG00000007122	raver2	ribonucleoprotein, PTB-binding 2 [Source:ZFIN;Acc:ZDB-GENE-090713-1]	groupVIII	7921434	7960181	1	-0.0287201	0.437869	-0.161388	5.81728	9.5581	0.0227212	0.0639269	11
ENSGACG00000015511	jund	jun D proto-oncogene [Source:ZFIN;Acc:ZDB-GENE-070725-2]	groupIII	8309013	8309948	1	0.391335	-0.020476	-0.103828	3.49511	9.55675	0.0227352	0.0639627	7
ENSGACG00000018244	inab	internexin neuronal intermediate filament protein, alpha b [Source:ZFIN;Acc:ZDB-GENE-990415-83]	groupIX	10749285	10751279	-1	-0.251034	0.0250201	-0.364394	6.20433	9.55436	0.0227601	0.0640255	11
ENSGACG00000010466	si:dkey-26c10.5	si:dkey-26c10.5 [Source:ZFIN;Acc:ZDB-GENE-060607-13]	groupXX	11932237	11936397	1	-0.224129	-0.385379	0.294137	6.78841	9.55194	0.0227851	0.0640925	7
ENSGACG00000000415	fat3a	FAT atypical cadherin 3a [Source:ZFIN;Acc:ZDB-GENE-060929-1254]	scaffold_119	101294	203489	1	0.0453873	0.435434	0.138936	8.20145	9.53944	0.0229155	0.0644555	11
ENSGACG00000006693	NT5C1A (1 of 2)	5'-nucleotidase, cytosolic IA [Source:HGNC Symbol;Acc:HGNC:17819]	groupXV	2973149	2977521	1	0.101597	-0.171873	0.373748	4.96396	9.53919	0.0229181	0.0644592	7
ENSGACG00000006712	kri1	KRI1 homolog [Source:ZFIN;Acc:ZDB-GENE-040915-3]	groupXI	3403023	3408552	1	-0.050945	-0.125685	0.355002	4.33345	9.5316	0.0229976	0.064672	7
ENSGACG00000009700	CHST15 (2 of 2)	carbohydrate (N-acetylgalactosamine 4-sulfate 6-O) sulfotransferase 15 [Source:HGNC Symbol;Acc:HGNC:18137]	groupVI	11743774	11747855	1	-0.341976	-0.892684	-0.318605	2.31632	9.52685	0.0230474	0.0648086	7
ENSGACG00000012980			groupXI	12605649	12606908	-1	-0.0528596	0.364617	0.557684	2.55075	9.51981	0.0231216	0.0650099	11
ENSGACG00000007434	ptpn9a	protein tyrosine phosphatase, non-receptor type 9, a [Source:ZFIN;Acc:ZDB-GENE-101027-1]	groupXIX	8584916	8591806	-1	-0.561243	-0.118877	0.22332	2.0896	9.51673	0.0231541	0.0650976	7
ENSGACG00000000987	svila	supervillin a [Source:ZFIN;Acc:ZDB-GENE-990706-5]	scaffold_37	1988687	2023111	1	0.432482	-0.323353	0.119492	5.17635	9.51638	0.0231577	0.0651044	7
ENSGACG00000020748	jakmip2	janus kinase and microtubule interacting protein 2 [Source:ZFIN;Acc:ZDB-GENE-091204-293]	groupVII	23994700	24002922	-1	0.00235349	0.282481	-0.115879	6.15484	9.5158	0.0231639	0.065118	11
ENSGACG00000015221	NCOA3 (2 of 2)	nuclear receptor coactivator 3 [Source:HGNC Symbol;Acc:HGNC:7670]	scaffold_68	728889	741447	1	-0.0173878	0.305423	-0.010631	4.59565	9.50591	0.0232686	0.0654052	11
ENSGACG00000006694	plaua	plasminogen activator, urokinase a [Source:ZFIN;Acc:ZDB-GENE-090313-278]	groupVI	7982340	7984539	-1	-0.207176	-1.09602	1.13509	0.474067	9.50319	0.0232974	0.0654788	12
ENSGACG00000017847	LPHN2 (2 of 2)	latrophilin 2 [Source:HGNC Symbol;Acc:HGNC:18582]	groupIII	16124121	16159719	-1	0.110087	0.30333	0.0552276	5.87391	9.49643	0.0233694	0.0656701	11
ENSGACG00000002821	rnaseh2b	ribonuclease H2, subunit B [Source:ZFIN;Acc:ZDB-GENE-040426-1090]	groupXVI	6947968	6950857	-1	0.514594	-0.156262	0.1681	3.16277	9.49545	0.0233799	0.0656959	7
ENSGACG00000019030	GAL3ST3	galactose-3-O-sulfotransferase 3 [Source:HGNC Symbol;Acc:HGNC:24144]	groupVII	2346844	2363295	1	0.0416609	0.361559	-0.220326	4.38011	9.49418	0.0233933	0.0657301	11
ENSGACG00000015932	MAP1B	microtubule-associated protein 1B [Source:HGNC Symbol;Acc:HGNC:6836]	groupXIV	2584536	2597754	1	-0.0619262	0.319318	-0.183987	8.54123	9.4765	0.0235827	0.0662586	11
ENSGACG00000020017	syt1a	synaptotagmin Ia [Source:ZFIN;Acc:ZDB-GENE-040718-165]	groupIV	31925264	31944068	1	-0.0592049	0.314793	-0.137217	7.7612	9.46972	0.0236557	0.0664526	11
ENSGACG00000005984	cbln20	cerebellin 20 [Source:ZFIN;Acc:ZDB-GENE-111109-2]	groupI	2180844	2181239	1	-2.64867	0.317683	1.00447	-2.21087	9.46143	0.0237453	0.0666968	10
ENSGACG00000003035	amigo3	adhesion molecule with Ig-like domain 3 [Source:ZFIN;Acc:ZDB-GENE-050208-449]	groupXVII	49166	50694	-1	0.18315	0.376019	0.205061	2.95126	9.45783	0.0237842	0.0668003	7
ENSGACG00000005844	PPP1R9B (2 of 2)	protein phosphatase 1, regulatory subunit 9B [Source:HGNC Symbol;Acc:HGNC:9298]	groupXI	2369598	2383585	-1	-0.168685	0.373126	-0.0778089	5.77009	9.45176	0.0238501	0.0669764	11
ENSGACG00000014202	SRCIN1 (2 of 2)	SRC kinase signaling inhibitor 1 [Source:HGNC Symbol;Acc:HGNC:29506]	groupXI	14595153	14607919	1	0.0306476	0.346367	-0.122072	5.19019	9.44725	0.0238992	0.0671106	11
ENSGACG00000018416			groupIX	12143032	12164384	-1	-0.867815	-1.20814	-0.492197	0.701929	9.4468	0.0239041	0.0671206	9
ENSGACG00000011458	nfasca	neurofascin homolog (chicken) a [Source:ZFIN;Acc:ZDB-GENE-080229-6]	groupXVII	12454256	12488095	1	-0.132368	0.339079	0.157575	6.28564	9.44486	0.0239252	0.0671761	11
ENSGACG00000008250			groupX	12683622	12684212	-1	3.94588	-0.971312	2.06506	2.09483	9.44434	0.023931	0.0671885	6
ENSGACG00000000744	med11	mediator complex subunit 11 [Source:ZFIN;Acc:ZDB-GENE-091207-2]	scaffold_47	243774	244460	1	0.390575	-0.399499	-0.137418	2.23647	9.43372	0.024047	0.067503	7
ENSGACG00000002448	zgc:112332	zgc:112332 [Source:ZFIN;Acc:ZDB-GENE-050522-387]	groupXXI	5186922	5193840	1	-0.308862	-0.426726	-0.0625152	6.22557	9.43352	0.0240492	0.0675056	7
ENSGACG00000018617			groupVII	288933	289898	-1	0.0660418	-0.288918	0.263311	3.24399	9.43338	0.0240508	0.0675061	7
ENSGACG00000004646	kcnq2a	potassium voltage-gated channel, KQT-like subfamily, member 2a [Source:ZFIN;Acc:ZDB-GENE-080220-37]	groupXII	4212224	4226440	1	0.436741	-0.00463817	0.025363	3.80216	9.41768	0.0242235	0.0679758	7
ENSGACG00000013327			groupXX	16118214	16120496	-1	-0.45603	-0.738945	1.05142	0.748841	9.40748	0.0243362	0.0682883	12
ENSGACG00000006670	avp	arginine vasopressin [Source:ZFIN;Acc:ZDB-GENE-030407-2]	groupXIII	5162715	5164290	1	-0.593556	-2.41139	2.80219	4.58834	9.39473	0.024478	0.0686634	2
ENSGACG00000009164	LYAR	Ly1 antibody reactive [Source:HGNC Symbol;Acc:HGNC:26021]	groupXVII	8775427	8778420	-1	-0.784358	-0.132361	0.234751	2.87989	9.39441	0.0244816	0.0686696	7
ENSGACG00000016084	hk1	hexokinase 1 [Source:ZFIN;Acc:ZDB-GENE-040426-2848]	groupII	13433139	13446582	1	-0.113713	-0.834605	0.453859	2.19973	9.38809	0.0245522	0.0688637	7
ENSGACG00000010601	rcv1	recoverin [Source:ZFIN;Acc:ZDB-GENE-030131-7590]	groupXX	12100423	12105492	-1	-1.13805	-1.96752	0.284443	-0.961258	9.38352	0.0246034	0.0689997	9
ENSGACG00000012769	ighv1-4 (1 of 3)	immunoglobulin heavy variable 1-4 [Source:ZFIN;Acc:ZDB-GENE-040514-1]	groupXI	12330953	12351249	-1	1.09755	-2.86616	2.25233	1.06816	9.37881	0.0246561	0.0691439	2
ENSGACG00000007372	csmd2	CUB and Sushi multiple domains 2 [Source:ZFIN;Acc:ZDB-GENE-030616-39]	groupX	10807926	10961030	-1	-0.0507127	0.459858	0.248162	6.13819	9.37765	0.0246692	0.0691766	11
ENSGACG00000017972	tcirg1	T-cell, immune regulator 1, ATPase, H+ transporting, lysosomal V0 subunit A3 [Source:ZFIN;Acc:ZDB-GENE-090311-31]	groupIV	10641984	10650309	-1	-0.0211768	-0.660835	0.765021	4.8713	9.37699	0.0246767	0.0691937	7
ENSGACG00000016050	CSMD1	CUB and Sushi multiple domains 1 [Source:HGNC Symbol;Acc:HGNC:14026]	groupII	13035298	13239947	-1	-0.0436082	0.520272	0.262464	6.54104	9.37586	0.0246894	0.0692256	11
ENSGACG00000019377			groupVII	4319824	4322239	-1	0.0543569	-0.196069	0.721768	2.38132	9.37445	0.0247052	0.069266	7
ENSGACG00000013216			groupXVIII	15307548	15316206	-1	0.847295	-0.520603	1.01291	1.51655	9.37323	0.0247189	0.0693008	12
ENSGACG00000006805	SLC5A7 (1 of 2)	solute carrier family 5 (sodium/choline cotransporter), member 7 [Source:HGNC Symbol;Acc:HGNC:14025]	groupXVI	13602905	13607696	1	-0.309555	-0.103044	-0.66471	1.30286	9.36991	0.0247563	0.0693978	11
ENSGACG00000010510	bcmo1l	beta-carotene 15,15'-monooxygenase 1-like [Source:ZFIN;Acc:ZDB-GENE-040426-1191]	scaffold_210	35851	40763	1	-0.0813527	-0.839681	0.327054	1.48408	9.3637	0.0248265	0.0695868	7
ENSGACG00000018430			groupIX	12189816	12192031	-1	0.147314	-0.936007	1.09531	3.654	9.36235	0.0248417	0.0696257	12
ENSGACG00000007543	nudt14	nudix (nucleoside diphosphate linked moiety X)-type motif 14 [Source:ZFIN;Acc:ZDB-GENE-041014-254]	groupXVIII	6421494	6434023	-1	-0.0833305	0.447061	-0.0998376	3.75366	9.34389	0.0250514	0.0701939	11
ENSGACG00000008829	kcnma1a	potassium large conductance calcium-activated channel, subfamily M, alpha member 1a [Source:ZFIN;Acc:ZDB-GENE-070202-9]	groupVI	10053208	10156710	1	0.165541	0.326487	0.0840247	5.86261	9.34222	0.0250705	0.0702397	11
ENSGACG00000015378	SLC5A7 (2 of 2)	solute carrier family 5 (sodium/choline cotransporter), member 7 [Source:HGNC Symbol;Acc:HGNC:14025]	groupII	8135996	8140663	-1	-1.6594	-1.77734	2.58646	-1.55901	9.30989	0.0254422	0.0712613	2
ENSGACG00000002022	grin2da	glutamate receptor, ionotropic, N-methyl D-aspartate 2D, a [Source:ZFIN;Acc:ZDB-GENE-041008-124]	scaffold_149	161791	168657	-1	-0.246406	0.577172	-0.0261004	3.8108	9.30799	0.0254642	0.0713151	11
ENSGACG00000003043	GRM7 (2 of 2)	glutamate receptor, metabotropic 7 [Source:HGNC Symbol;Acc:HGNC:4599]	groupXVII	111370	177263	-1	-0.200229	0.318375	-0.0435206	4.24492	9.30393	0.0255113	0.0714391	11
ENSGACG00000020893			groupVII	27670417	27672409	1	1.00362	-0.251092	0.318917	-0.100337	9.28619	0.0257182	0.0719984	7
ENSGACG00000018757	SLITRK4	SLIT and NTRK-like family, member 4 [Source:HGNC Symbol;Acc:HGNC:23502]	groupIV	17020689	17023343	1	-0.0763088	0.289989	-0.130471	5.63434	9.28577	0.0257231	0.0720082	11
ENSGACG00000019365	shbg	sex hormone binding globulin [Source:ZFIN;Acc:ZDB-GENE-030131-1324]	groupVII	4261545	4265559	-1	-0.713194	-0.7139	0.893417	0.823755	9.28522	0.0257295	0.0720149	7
ENSGACG00000016040	phyhd1	phytanoyl-CoA dioxygenase domain containing 1 [Source:ZFIN;Acc:ZDB-GENE-041114-159]	groupXIV	2926358	2929031	1	0.111229	-0.493969	0.107001	3.18948	9.27303	0.0258727	0.0723988	7
ENSGACG00000018105	xylb	xylulokinase homolog (H. influenzae) [Source:ZFIN;Acc:ZDB-GENE-040426-1373]	scaffold_182	98168	106459	1	0.308245	0.0578606	0.367473	3.95064	9.26836	0.0259277	0.0725487	7
ENSGACG00000010992			groupVI	14037235	14039561	-1	0.307834	-0.258091	0.0451071	3.53354	9.25995	0.0260271	0.0728107	7
ENSGACG00000007718	npc2	Niemann-Pick disease, type C2 [Source:ZFIN;Acc:ZDB-GENE-021206-13]	groupXV	4827386	4829230	1	-0.0375713	-0.517727	0.41598	4.92308	9.2518	0.0261238	0.0730691	7
ENSGACG00000013425	zgc:101731	zgc:101731 [Source:ZFIN;Acc:ZDB-GENE-040912-57]	groupI	18038142	18045304	-1	-0.94377	-1.05758	0.36613	-0.103899	9.24795	0.0261697	0.0731934	9
ENSGACG00000017231	hhip	hedgehog interacting protein [Source:ZFIN;Acc:ZDB-GENE-030131-4827]	groupIX	6984162	7010621	-1	-0.12612	0.630637	-0.0264415	2.25239	9.23251	0.026354	0.0737009	11
ENSGACG00000008331	lrit1a	leucine-rich repeat, immunoglobulin-like and transmembrane domains 1a [Source:ZFIN;Acc:ZDB-GENE-040924-5]	groupVI	9584953	9588540	1	0.778154	-1.43788	-0.298898	-0.395715	9.22699	0.0264203	0.0738741	6
ENSGACG00000006581	irx2a	iroquois homeobox protein 2, a [Source:ZFIN;Acc:ZDB-GENE-040426-1446]	groupXX	6866236	6871152	1	-0.127516	-0.560252	2.7152	-1.47066	9.22543	0.0264391	0.0739225	2
ENSGACG00000007625	ntrk2a	neurotrophic tyrosine kinase, receptor, type 2a [Source:ZFIN;Acc:ZDB-GENE-010126-1]	groupXIII	7299378	7355187	1	-0.0329358	0.313631	-0.285902	7.70876	9.21513	0.0265632	0.0742653	11
ENSGACG00000013710	nfkbiz	nuclear factor of kappa light polypeptide gene enhancer in B-cells inhibitor, zeta [Source:ZFIN;Acc:ZDB-GENE-071024-1]	groupI	19964369	19967809	-1	-1.59332	0.744439	-0.1136	-0.357191	9.21218	0.0265988	0.0743609	10
ENSGACG00000013437	LPIN1 (1 of 2)	lipin 1 [Source:HGNC Symbol;Acc:HGNC:13345]	groupXVIII	15739307	15747826	1	-0.476243	-0.0330966	-0.388667	3.07198	9.2119	0.0266023	0.0743664	11
ENSGACG00000016848	g3bp1	GTPase activating protein (SH3 domain) binding protein 1 [Source:ZFIN;Acc:ZDB-GENE-030131-7452]	groupIV	4494737	4499767	1	-0.337595	0.117961	-0.0294223	5.20781	9.21021	0.0266227	0.0744152	11
ENSGACG00000008819			groupXX	10254332	10256022	-1	0.0140234	-1.10992	0.747794	4.37597	9.20502	0.0266856	0.074587	12
ENSGACG00000020184	igsf9b (2 of 3)	immunoglobulin superfamily, member 9b [Source:ZFIN;Acc:ZDB-GENE-060810-28]	groupVII	12999068	13000123	1	-0.32009	0.984274	0.442453	-0.499884	9.20448	0.0266922	0.0746011	11
ENSGACG00000006403	NDUFA4L2 (2 of 2)	NADH dehydrogenase (ubiquinone) 1 alpha subcomplex, 4-like 2 [Source:HGNC Symbol;Acc:HGNC:29836]	groupXVII	5099666	5105780	1	-0.0525348	-1.90465	0.312285	1.12693	9.20434	0.0266938	0.0746017	9
ENSGACG00000013100	tet3	tet methylcytosine dioxygenase 3 [Source:ZFIN;Acc:ZDB-GENE-060526-109]	groupXIII	16007734	16017015	1	-0.159504	0.426165	0.135812	4.5176	9.20307	0.0267093	0.0746367	11
ENSGACG00000020086			groupVII	10426420	10441392	1	0.381099	0.845658	0.362805	3.5319	9.20263	0.0267146	0.0746474	7
ENSGACG00000019412	ADAP2 (2 of 2)	ArfGAP with dual PH domains 2 [Source:HGNC Symbol;Acc:HGNC:16487]	groupIX	17372989	17375813	-1	-0.202063	-0.688967	0.288416	2.06552	9.2018	0.0267248	0.0746716	7
ENSGACG00000013762			groupXI	13483375	13490622	1	-0.336034	-0.290146	0.449913	5.00521	9.17709	0.0270268	0.0754946	7
ENSGACG00000014848	mctp2b	multiple C2 domains, transmembrane 2b [Source:ZFIN;Acc:ZDB-GENE-050506-136]	groupII	5193703	5219872	-1	-1.39223	0.171981	0.213621	-0.0743004	9.17147	0.0270959	0.0756834	10
ENSGACG00000009986	SSBP4 (1 of 2)	single stranded DNA binding protein 4 [Source:HGNC Symbol;Acc:HGNC:15676]	groupXV	8264211	8288872	1	-0.099114	0.325488	-0.16256	4.32334	9.16691	0.0271521	0.075828	11
ENSGACG00000005035			groupVIII	3754466	3755656	1	-2.02804	2.26255	-1.1137	-1.70132	9.16149	0.027219	0.0760064	8
ENSGACG00000014543	ccdc102a	coiled-coil domain containing 102A [Source:ZFIN;Acc:ZDB-GENE-030131-4044]	groupII	3790119	3833139	-1	-0.0783795	0.382206	-0.233271	3.34166	9.15985	0.0272394	0.0760592	11
ENSGACG00000000866			scaffold_197	109482	111364	1	-0.35016	-0.569931	1.24563	-0.308411	9.15221	0.0273342	0.0763153	12
ENSGACG00000019372	pik3r5	phosphoinositide-3-kinase, regulatory subunit 5 [Source:ZFIN;Acc:ZDB-GENE-030131-2308]	groupIX	16835067	16845153	-1	0.195836	-1.24709	0.963786	0.504923	9.15172	0.0273403	0.0763281	12
ENSGACG00000017967			groupIII	16679542	16682223	1	0.656418	-1.104	0.893571	1.39926	9.15076	0.0273522	0.0763571	12
ENSGACG00000020694	DLG4 (2 of 2)	discs, large homolog 4 (Drosophila) [Source:HGNC Symbol;Acc:HGNC:2903]	groupVII	22467572	22490298	1	-0.0247991	0.333102	0.048187	7.16068	9.13353	0.0275673	0.0769321	11
ENSGACG00000012121	gab2	GRB2-associated binding protein 2 [Source:ZFIN;Acc:ZDB-GENE-130530-756]	groupI	14705632	14731422	1	-0.00850578	0.292186	-0.309614	3.81177	9.13106	0.0275982	0.0770141	11
ENSGACG00000014227	pebp1	phosphatidylethanolamine binding protein 1 [Source:ZFIN;Acc:ZDB-GENE-040426-2621]	groupXIII	18283296	18284914	1	0.293204	-0.000932469	0.0934675	5.78526	9.12664	0.0276536	0.0771646	7
ENSGACG00000007177	WDR49	WD repeat domain 49 [Source:HGNC Symbol;Acc:HGNC:26587]	groupI	4818207	4825298	1	-0.531195	0.309928	0.364832	1.09106	9.11726	0.0277718	0.077473	11
ENSGACG00000018877			groupIX	14766588	14767493	1	0.680215	-1.84036	0.71621	-1.31205	9.11325	0.0278224	0.07761	9
ENSGACG00000000193			scaffold_198	54786	56486	1	0.944794	-1.0353	1.61112	-1.06402	9.1095	0.0278699	0.0777338	12
ENSGACG00000006478	b3gat1a	beta-1,3-glucuronyltransferase 1 (glucuronosyltransferase P) a [Source:ZFIN;Acc:ZDB-GENE-050419-21]	groupI	3273500	3300395	1	0.135283	0.36326	0.0821436	6.21926	9.09544	0.0280485	0.078206	11
ENSGACG00000007358	SYN2 (2 of 2)	synapsin II [Source:HGNC Symbol;Acc:HGNC:11495]	groupXVII	6150360	6195819	1	-0.0136112	0.252062	-0.158523	7.77663	9.08776	0.0281466	0.0784665	11
ENSGACG00000015784	HOMER1 (2 of 2)	homer homolog 1 (Drosophila) [Source:HGNC Symbol;Acc:HGNC:17512]	groupXIV	1072364	1079232	-1	-0.104953	0.430525	-0.129725	4.9684	9.08263	0.0282122	0.0786407	11
ENSGACG00000004122	PDZRN4 (1 of 2)	PDZ domain containing ring finger 4 [Source:HGNC Symbol;Acc:HGNC:30552]	groupXIX	5731261	5745441	-1	0.154435	0.355411	-0.198684	3.65962	9.07098	0.0283619	0.0790493	11
ENSGACG00000011617			groupXIII	13147141	13149317	1	-0.314999	-0.0383043	3.18675	1.03088	9.06361	0.028457	0.0793003	2
ENSGACG00000013926	CEMIP	cell migration inducing protein, hyaluronan binding [Source:HGNC Symbol;Acc:HGNC:29213]	groupII	10305	97507	-1	0.478635	0.334732	-0.0716549	4.32124	9.06352	0.0284582	0.0793003	7
ENSGACG00000009715	slc16a6a	solute carrier family 16 (monocarboxylic acid transporters), member 6a [Source:ZFIN;Acc:ZDB-GENE-110208-1]	groupV	11520659	11524884	-1	-0.326159	-1.56288	0.0804524	5.63886	9.05947	0.0285106	0.0794419	9
ENSGACG00000020163	micu2	mitochondrial calcium uptake 2 [Source:ZFIN;Acc:ZDB-GENE-030131-3374]	groupVII	12597726	12602208	1	0.317341	-0.240418	-0.0626356	4.89401	9.05619	0.0285531	0.0795471	7
ENSGACG00000017537	bcr	breakpoint cluster region [Source:ZFIN;Acc:ZDB-GENE-040724-43]	groupXIV	8099548	8156144	-1	-0.0782961	0.354481	-0.0407654	5.75075	9.05274	0.0285978	0.0796542	11
ENSGACG00000013135	vwf	von Willebrand factor [Source:ZFIN;Acc:ZDB-GENE-070103-1]	groupXIX	16862309	16879962	1	0.506481	-0.0186585	0.00850982	3.37117	9.04353	0.0287177	0.0799792	7
ENSGACG00000016168	ACTC1 (4 of 4)	actin, alpha, cardiac muscle 1 [Source:HGNC Symbol;Acc:HGNC:143]	groupII	13640060	13643928	-1	-2.02685	2.46939	-0.835058	1.25855	9.03712	0.0288014	0.080199	8
ENSGACG00000020219	ftr83	finTRIM family, member 83 [Source:ZFIN;Acc:ZDB-GENE-031002-11]	groupVII	14235040	14240999	1	-1.61261	-0.244162	-0.895013	-0.196813	9.03151	0.0288748	0.0803992	9
ENSGACG00000016622	myo15ab	myosin XVAb [Source:ZFIN;Acc:ZDB-GENE-090312-149]	groupIX	4636527	4665245	-1	0.623594	0.0187388	0.130549	3.54766	9.02731	0.02893	0.0805483	7
ENSGACG00000013282	MEX3A	mex-3 RNA binding family member A [Source:HGNC Symbol;Acc:HGNC:33482]	groupXX	16030810	16035735	-1	-0.12839	0.639162	-0.307072	3.52076	9.02226	0.0289964	0.0807242	11
ENSGACG00000003175	SLC4A7	solute carrier family 4, sodium bicarbonate cotransporter, member 7 [Source:HGNC Symbol;Acc:HGNC:11033]	groupX	4268000	4288302	1	0.0703005	0.334731	0.0619406	5.97655	9.02039	0.029021	0.0807884	11
ENSGACG00000004787	apopt1	apoptogenic 1, mitochondrial [Source:ZFIN;Acc:ZDB-GENE-090313-66]	groupXV	917635	920628	1	0.178553	-0.496206	0.0900555	4.28703	9.01199	0.0291319	0.0810839	7
ENSGACG00000013187	med23	mediator complex subunit 23 [Source:ZFIN;Acc:ZDB-GENE-040724-82]	groupXVIII	15261256	15275935	1	-0.568989	0.0486698	0.0743773	6.1686	9.00275	0.0292543	0.08142	7
ENSGACG00000014569	echdc2	enoyl CoA hydratase domain containing 2 [Source:ZFIN;Acc:ZDB-GENE-030219-147]	groupVIII	19196635	19207029	1	-0.230266	-0.415198	0.451148	1.52269	8.9956	0.0293494	0.0816711	7
ENSGACG00000000391			scaffold_341	1271	2388	1	0.237866	5.61801	-1.7394	-1.0149	8.97487	0.0296268	0.082416	8
ENSGACG00000018129	spon2a	spondin 2a, extracellular matrix protein [Source:ZFIN;Acc:ZDB-GENE-990415-160]	groupIV	11510611	11519827	1	-0.0114205	-0.155885	-1.03779	0.448556	8.97299	0.0296522	0.082482	7
ENSGACG00000013150	ntrk1	neurotrophic tyrosine kinase, receptor, type 1 [Source:ZFIN;Acc:ZDB-GENE-980526-118]	groupXX	15652471	15673846	-1	1.44924	0.19963	0.089807	-0.0774385	8.95891	0.0298423	0.0829924	6
ENSGACG00000016682	irx3a	iroquois homeobox protein 3a [Source:ZFIN;Acc:ZDB-GENE-991119-5]	groupII	17179737	17181705	1	-0.478988	-0.698188	2.77334	-0.824228	8.95866	0.0298456	0.082997	2
ENSGACG00000001055	scospondin	subcommissural organ spondin [Source:ZFIN;Acc:ZDB-GENE-051114-1]	scaffold_37	2346135	2424188	1	-0.0397217	0.177015	1.27136	0.471317	8.95448	0.0299023	0.0831457	12
ENSGACG00000003518	fam213ab	family with sequence similarity 213, member Ab [Source:ZFIN;Acc:ZDB-GENE-060929-88]	groupV	3747406	3748943	-1	1.49465	0.115799	-0.183537	0.884635	8.95226	0.0299324	0.0832246	6
ENSGACG00000019667	erc1b	ELKS/RAB6-interacting/CAST family member 1b [Source:ZFIN;Acc:ZDB-GENE-041210-51]	groupIV	28541508	28617787	-1	-0.0270253	0.360731	0.0302033	6.36806	8.95104	0.0299489	0.0832661	11
ENSGACG00000002509	RLTPR	RGD motif, leucine rich repeats, tropomodulin domain and proline-rich containing [Source:HGNC Symbol;Acc:HGNC:27089]	groupXIX	1443746	1457433	1	-0.124827	0.858983	-0.133204	2.24097	8.9456	0.030023	0.0834629	11
ENSGACG00000012327	pak4	p21 protein (Cdc42/Rac)-activated kinase 4 [Source:ZFIN;Acc:ZDB-GENE-040704-69]	groupI	15706210	15715084	1	-0.256452	-0.0164307	-0.407389	2.6894	8.93927	0.0301093	0.0836891	11
ENSGACG00000012693	si:ch73-379f7.5	si:ch73-379f7.5 [Source:ZFIN;Acc:ZDB-GENE-120215-18]	scaffold_151	1247	2636	-1	0.0325749	0.355455	0.188763	3.29803	8.93046	0.0302299	0.0840196	11
ENSGACG00000011259	CAMKK1 (1 of 2)	calcium/calmodulin-dependent protein kinase kinase 1, alpha [Source:HGNC Symbol;Acc:HGNC:1469]	groupI	12361944	12367073	-1	0.379508	-1.93466	0.206079	-1.22626	8.92825	0.0302602	0.0840947	9
ENSGACG00000009730	TNNI1 (2 of 2)	troponin I type 1 (skeletal, slow) [Source:HGNC Symbol;Acc:HGNC:11945]	groupXII	12109940	12111834	1	-0.945205	-0.867188	0.0235717	0.572576	8.92262	0.0303376	0.0843005	9
ENSGACG00000019467	csrp2	cysteine and glycine-rich protein 2 [Source:ZFIN;Acc:ZDB-GENE-040426-1863]	groupIV	25082914	25088724	-1	0.0349486	-0.364798	0.204616	4.13094	8.92236	0.0303412	0.0843028	7
ENSGACG00000005318	igf2bp1	insulin-like growth factor 2 mRNA binding protein 1 [Source:ZFIN;Acc:ZDB-GENE-060929-1258]	groupXI	1217111	1244993	-1	-0.161003	1.0471	-0.00707543	0.176577	8.91404	0.0304559	0.0846151	11
ENSGACG00000008068	DYNC2H1	dynein, cytoplasmic 2, heavy chain 1 [Source:HGNC Symbol;Acc:HGNC:2962]	groupI	6458406	6536357	1	0.00508175	0.251153	0.290768	4.96237	8.9073	0.0305491	0.0848555	11
ENSGACG00000009053	sox4b	SRY-box containing gene 4b [Source:ZFIN;Acc:ZDB-GENE-040426-1274]	groupX	13859672	13860778	-1	-0.274585	0.462781	-0.0311874	3.69297	8.90199	0.0306228	0.0850507	11
ENSGACG00000012864	zgc:112982	zgc:112982 [Source:ZFIN;Acc:ZDB-GENE-050306-55]	scaffold_126	230281	234261	1	0.180531	-0.384863	0.0779181	5.18216	8.89704	0.0306916	0.0852327	7
ENSGACG00000013403	wdr26b	WD repeat domain 26b [Source:ZFIN;Acc:ZDB-GENE-041014-277]	groupXVIII	15679131	15687746	1	-0.119033	0.153628	-0.163999	5.50622	8.89586	0.030708	0.0852734	11
ENSGACG00000013076	kat6a	K(lysine) acetyltransferase 6A [Source:ZFIN;Acc:ZDB-GENE-021022-3]	groupXIII	15952079	15970721	1	0.0470815	0.337301	0.0615379	5.17884	8.89558	0.0307119	0.0852795	11
ENSGACG00000011037	lppr3a	lipid phosphate phosphatase-related protein type 3a [Source:ZFIN;Acc:ZDB-GENE-070912-555]	groupXV	10306494	10314194	1	0.0906195	0.418599	0.0535515	3.49479	8.88943	0.0307977	0.085513	11
ENSGACG00000005468	SYT7	synaptotagmin VII [Source:HGNC Symbol;Acc:HGNC:11514]	groupXIX	6952818	6984246	-1	0.0148049	0.498476	0.0763912	5.12541	8.8571	0.0312524	0.0867231	11
ENSGACG00000008527	im:7148400	im:7148400 [Source:ZFIN;Acc:ZDB-GENE-050309-74]	groupXI	5661792	5665608	1	-0.312459	-0.187455	0.545885	2.18853	8.85633	0.0312633	0.0867488	7
ENSGACG00000012341	mut	methylmalonyl Coenzyme A mutase [Source:ZFIN;Acc:ZDB-GENE-010430-3]	groupXVIII	13753592	13763064	-1	0.0536757	-0.215566	0.146165	5.49478	8.85438	0.0312909	0.0868206	7
ENSGACG00000008553	atp6v0a1a	ATPase, H+ transporting, lysosomal V0 subunit a isoform 1a [Source:ZFIN;Acc:ZDB-GENE-030131-3027]	groupXI	5708601	5718665	-1	-0.0567161	-0.452775	0.246688	4.91841	8.85407	0.0312954	0.0868283	7
ENSGACG00000005970			groupXI	2515096	2516105	1	0.701096	-1.32515	2.93778	1.52599	8.84849	0.0313746	0.0870383	2
ENSGACG00000001371	zgc:194336	zgc:194336 [Source:ZFIN;Acc:ZDB-GENE-080723-34]	scaffold_156	166118	167493	-1	0.149157	-0.924693	-0.0150768	2.29828	8.84578	0.0314131	0.0871359	7
ENSGACG00000017794	parp2	poly (ADP-ribose) polymerase family, member 2 [Source:ZFIN;Acc:ZDB-GENE-031113-6]	groupIII	16016919	16023748	-1	0.217448	-0.242891	-0.191601	3.8171	8.84578	0.0314132	0.0871359	7
ENSGACG00000014566	blvra	biliverdin reductase A [Source:ZFIN;Acc:ZDB-GENE-060929-312]	groupIII	5088854	5093804	-1	-0.0317415	-0.19449	0.265609	5.27312	8.83505	0.0315664	0.0875465	7
ENSGACG00000020723	kctd16b	potassium channel tetramerisation domain containing 16b [Source:ZFIN;Acc:ZDB-GENE-060117-2]	groupVII	23079502	23129565	-1	-0.0289026	0.481354	-0.13606	4.39777	8.83219	0.0316073	0.0876552	11
ENSGACG00000018593			groupVII	216242	217015	1	1.51386	-1.72714	-1.0693	-1.31889	8.82655	0.0316882	0.087865	6
ENSGACG00000016360	pcdh1b	protocadherin 1b [Source:ZFIN;Acc:ZDB-GENE-091015-2]	groupIV	472586	477561	1	-0.107032	0.225046	-0.269068	5.73458	8.81846	0.0318045	0.0881828	11
ENSGACG00000005146	gad2	glutamate decarboxylase 2 [Source:ZFIN;Acc:ZDB-GENE-030909-9]	groupXXI	11006245	11014630	-1	-0.228807	0.203887	-0.0655752	6.91858	8.81655	0.031832	0.0882541	11
ENSGACG00000014007	col27a1b	collagen, type XXVII, alpha 1b [Source:ZFIN;Acc:ZDB-GENE-100119-2]	groupXIII	17704841	17747886	1	0.1857	-0.591661	0.208873	2.01855	8.81408	0.0318677	0.0883482	7
ENSGACG00000006497	erbb4b	v-erb-a erythroblastic leukemia viral oncogene homolog 4b (avian) [Source:ZFIN;Acc:ZDB-GENE-030918-5]	groupXVI	12504905	12715459	1	-0.12697	0.46582	-0.125392	4.44279	8.8102	0.0319238	0.088494	11
ENSGACG00000008321	tnni2a.2	troponin I, skeletal, fast 2a, tandem duplicate 2 [Source:ZFIN;Acc:ZDB-GENE-040426-970]	groupXIX	9291925	9297476	1	-4.37963	2.81618	-2.28425	-0.89506	8.80957	0.0319329	0.0885145	5
ENSGACG00000000326			scaffold_395	11467	15104	-1	-0.66675	-0.899174	1.23421	3.34707	8.79533	0.0321396	0.0890776	12
ENSGACG00000005836			groupXX	5054503	5065453	-1	1.39108	-0.227643	-0.0423507	1.95255	8.78912	0.0322301	0.0893137	6
ENSGACG00000009770			groupX	15052016	15053444	1	0.712613	-1.16514	1.29213	1.20437	8.78865	0.0322369	0.0893277	12
ENSGACG00000005288	gpr158a	G protein-coupled receptor 158a [Source:ZFIN;Acc:ZDB-GENE-060130-18]	groupXXI	11071913	11111366	-1	-0.048646	0.274442	-0.16039	4.70586	8.78722	0.0322578	0.0893808	11
ENSGACG00000016302	c1qtnf3	C1q and tumor necrosis factor related protein 3 [Source:ZFIN;Acc:ZDB-GENE-050522-484]	groupXIV	3527811	3535413	-1	-0.204552	-0.34834	0.322023	2.35523	8.77839	0.0323871	0.089729	7
ENSGACG00000013509	aldh3a2a	aldehyde dehydrogenase 3 family, member A2a [Source:ZFIN;Acc:ZDB-GENE-040718-74]	groupI	18381599	18387921	-1	-0.157313	-0.279767	0.242996	3.7393	8.77717	0.0324051	0.0897691	7
ENSGACG00000000147	psmb9a (5 of 5)	proteasome (prosome, macropain) subunit, beta type, 9a [Source:ZFIN;Acc:ZDB-GENE-990415-140]	scaffold_58	1063341	1065352	-1	-0.756631	-0.809193	1.82118	-0.761602	8.77186	0.0324831	0.0899803	12
ENSGACG00000001867			scaffold_1479	232	1508	1	0.19217	-0.559637	-0.0966039	2.68849	8.7661	0.0325679	0.0902054	7
ENSGACG00000012538			groupXIX	15950976	15952742	1	-0.393361	-0.564958	-0.34268	2.43351	8.76611	0.0325678	0.0902054	7
ENSGACG00000014579	ccr12.3	chemokine (C-C motif) receptor 12.3 [Source:ZFIN;Acc:ZDB-GENE-060503-97]	groupIII	5109655	5111039	1	0.134246	-1.34109	0.977545	2.93727	8.76215	0.0326263	0.0903473	12
ENSGACG00000006967	tbc1d5	TBC1 domain family, member 5 [Source:ZFIN;Acc:ZDB-GENE-040426-1197]	groupX	9646796	9661846	1	-0.266202	0.200154	0.0921978	4.81681	8.76002	0.0326578	0.0904294	11
ENSGACG00000015416	si:ch211-269i23.2 (2 of 2)	si:ch211-269i23.2 [Source:ZFIN;Acc:ZDB-GENE-090312-99]	groupIII	7982415	7985857	1	0.388252	-1.39365	0.298127	0.647309	8.7591	0.0326713	0.0904621	9
ENSGACG00000005235	RTP5	receptor (chemosensory) transporter protein 5 (putative) [Source:HGNC Symbol;Acc:HGNC:26585]	groupX	7867059	7867349	-1	0.793141	-0.763905	1.18493	0.165436	8.7585	0.0326802	0.0904818	12
ENSGACG00000014216	farp1	FERM, RhoGEF (ARHGEF) and pleckstrin domain protein 1 (chondrocyte-derived) [Source:ZFIN;Acc:ZDB-GENE-070424-163]	groupI	21155272	21181371	1	-0.223332	-0.219765	0.0303884	5.37774	8.75523	0.0327287	0.0906059	7
ENSGACG00000019920	KDM6B (1 of 2)	lysine (K)-specific demethylase 6B [Source:HGNC Symbol;Acc:HGNC:29012]	groupVII	8160493	8164391	-1	-0.168821	0.35702	0.186054	4.38227	8.74889	0.0328228	0.0908515	11
ENSGACG00000003180			groupVIII	1206808	1210913	1	-0.285758	0.213626	0.427384	2.03119	8.74798	0.0328362	0.0908787	11
ENSGACG00000009095	fndc5b	fibronectin type III domain containing 5b [Source:ZFIN;Acc:ZDB-GENE-060503-916]	groupX	13979153	13981811	-1	-0.069302	0.462898	0.0485735	2.29557	8.73815	0.0329827	0.0912792	11
ENSGACG00000004912	SPDEF (2 of 2)	SAM pointed domain containing ETS transcription factor [Source:HGNC Symbol;Acc:HGNC:17257]	groupXVII	2990590	2992468	1	-3.18786	1.37255	1.17131	-2.62734	8.73341	0.0330535	0.0914702	10
ENSGACG00000008926	pcsk1	proprotein convertase subtilisin/kexin type 1 [Source:ZFIN;Acc:ZDB-GENE-071009-1]	groupXVII	8529588	8540152	-1	-0.230789	0.222656	0.108341	7.19613	8.73085	0.033092	0.0915666	11
ENSGACG00000008311	def6a	differentially expressed in FDCP 6a homolog (mouse) [Source:ZFIN;Acc:ZDB-GENE-040426-1246]	groupXII	10464460	10472941	-1	0.121829	-0.718714	-0.584839	3.65305	8.73009	0.0331033	0.0915928	7
ENSGACG00000015588	si:dkey-208k22.3	si:dkey-208k22.3 [Source:ZFIN;Acc:ZDB-GENE-070912-432]	groupIII	8595630	8598672	1	0.42687	-1.89198	0.103463	1.07508	8.72355	0.0332014	0.0918493	9
ENSGACG00000014776	socs7		groupXI	15882825	15884607	1	-0.183949	0.127783	0.758738	3.04486	8.72252	0.0332169	0.0918872	7
ENSGACG00000007225	gpn2	GPN-loop GTPase 2 [Source:ZFIN;Acc:ZDB-GENE-041010-86]	groupXX	8139823	8143249	1	0.150663	-0.343824	-0.194661	3.26271	8.71339	0.0333545	0.0922577	7
ENSGACG00000003637	scly	selenocysteine lyase [Source:ZFIN;Acc:ZDB-GENE-080204-30]	groupVIII	1714669	1718358	1	-0.098736	-0.266548	0.145584	4.77431	8.70939	0.033415	0.0924149	7
ENSGACG00000011493			groupVIII	14614788	14656929	1	0.01431	0.350841	0.0094913	4.05498	8.70702	0.0334508	0.0925089	11
ENSGACG00000019745	slc3a2a	solute carrier family 3, member 2a [Source:ZFIN;Acc:ZDB-GENE-000831-3]	groupVII	7463600	7468791	-1	-0.0889143	-0.369478	-0.0868344	6.69701	8.70322	0.0335084	0.092658	7
ENSGACG00000001565	ERC2	ELKS/RAB6-interacting/CAST family member 2 [Source:HGNC Symbol;Acc:HGNC:31922]	scaffold_27	4575189	4597122	1	-0.108478	0.316245	-0.116903	6.02813	8.69752	0.0335949	0.0928821	11
ENSGACG00000010179	VAMP1	vesicle-associated membrane protein 1 (synaptobrevin 1) [Source:HGNC Symbol;Acc:HGNC:12642]	groupXX	11722590	11726280	-1	0.623561	0.208894	0.317669	4.53065	8.68368	0.033806	0.0934503	7
ENSGACG00000019332	EVI5L	ecotropic viral integration site 5-like [Source:HGNC Symbol;Acc:HGNC:30464]	groupIX	16525003	16535072	-1	-0.118418	0.264897	-0.000226404	5.05622	8.6795	0.03387	0.0936169	11
ENSGACG00000012384	camta1a	calmodulin binding transcription activator 1a [Source:ZFIN;Acc:ZDB-GENE-090312-183]	groupXII	16204727	16225483	-1	-0.0451254	0.410829	0.179588	4.27742	8.66849	0.0340391	0.0940638	11
ENSGACG00000002037	ATAD2 (1 of 2)	ATPase family, AAA domain containing 2 [Source:HGNC Symbol;Acc:HGNC:30123]	scaffold_472	904	4317	1	0.998434	-0.400744	0.127217	1.16498	8.66519	0.03409	0.0941941	7
ENSGACG00000009966	anp32e (2 of 2)	acidic (leucine-rich) nuclear phosphoprotein 32 family, member E [Source:ZFIN;Acc:ZDB-GENE-040426-2448]	groupX	15320390	15323228	1	-0.049755	-0.063575	0.299745	4.36308	8.66438	0.0341026	0.0942237	7
ENSGACG00000002928	cdh2	cadherin 2, neuronal [Source:ZFIN;Acc:ZDB-GENE-990415-171]	groupVIII	95049	134723	1	-0.0310917	0.271766	-0.0996838	5.63666	8.65279	0.0342818	0.0946879	11
ENSGACG00000000233	SULF2 (1 of 2)	sulfatase 2 [Source:HGNC Symbol;Acc:HGNC:20392]	scaffold_114	17899	105837	1	-0.0490542	0.331544	-0.127652	4.38424	8.65248	0.0342867	0.0946962	11
ENSGACG00000003847	dlgap1b	discs, large (Drosophila) homolog-associated protein 1b [Source:ZFIN;Acc:ZDB-GENE-091116-98]	groupXXI	8805170	8837399	-1	-0.184187	0.0803704	0.324859	3.858	8.64516	0.0344004	0.0949946	11
ENSGACG00000014359			groupVIII	18879639	18882129	1	-0.245389	-0.619	0.382812	1.72816	8.64374	0.0344224	0.0950503	7
ENSGACG00000020185	igsf9b (3 of 3)	immunoglobulin superfamily, member 9b [Source:ZFIN;Acc:ZDB-GENE-060810-28]	groupVII	13020806	13056193	1	-0.167878	0.440793	0.225607	3.33489	8.63844	0.0345051	0.0952681	11
ENSGACG00000009971	DBNDD2 (1 of 2)	dysbindin (dystrobrevin binding protein 1) domain containing 2 [Source:HGNC Symbol;Acc:HGNC:15881]	groupXVII	10000487	10009921	1	-0.333542	-0.252419	0.185371	3.15975	8.63611	0.0345414	0.0953632	7
ENSGACG00000012741	cacna1aa	calcium channel, voltage-dependent, P/Q type, alpha 1A subunit, a [Source:ZFIN;Acc:ZDB-GENE-040724-26]	groupXI	12221507	12273453	1	-0.0889802	0.445892	0.259923	6.70845	8.63498	0.0345591	0.0954046	11
ENSGACG00000000366	RASGRF2 (1 of 2)	Ras protein-specific guanine nucleotide-releasing factor 2 [Source:HGNC Symbol;Acc:HGNC:9876]	scaffold_168	115805	132206	1	0.187828	-1.23277	0.35424	0.738624	8.6332	0.0345869	0.0954733	9
ENSGACG00000019224	cep170b	centrosomal protein 170b [Source:ZFIN;Acc:ZDB-GENE-050309-106]	groupIX	16048022	16056648	1	-0.0118133	0.291823	-0.0443262	6.2714	8.62953	0.0346443	0.0956265	11
ENSGACG00000001752			scaffold_662	11137	11907	1	-0.705881	0.915351	-0.308536	1.43906	8.62855	0.0346598	0.095664	10
ENSGACG00000006765	lgi1b	leucine-rich, glioma inactivated 1b [Source:ZFIN;Acc:ZDB-GENE-060217-1]	groupV	8822554	8830066	1	-0.0484627	0.291043	0.320685	4.28675	8.62439	0.034725	0.0958283	11
ENSGACG00000000728	ache	acetylcholinesterase [Source:ZFIN;Acc:ZDB-GENE-010906-1]	scaffold_47	151541	159998	1	-0.22759	0.287281	-0.157254	5.32286	8.61108	0.0349347	0.0963806	11
ENSGACG00000005930	rpe65c	retinal pigment epithelium-specific protein 65c [Source:ZFIN;Acc:ZDB-GENE-081104-505]	groupVIII	5856337	5863166	1	-0.239305	-0.550906	-0.152822	5.9615	8.60929	0.034963	0.0964481	7
ENSGACG00000014273			groupVIII	18697543	18701655	1	-0.292695	0.361426	0.284997	2.98359	8.60246	0.035071	0.0967198	11
ENSGACG00000020693	zbtb20	zinc finger and BTB domain containing 20 [Source:ZFIN;Acc:ZDB-GENE-070112-1992]	groupVII	22406697	22410320	-1	-0.0972817	0.603436	-0.070524	4.13132	8.59973	0.0351144	0.096829	11
ENSGACG00000005303	paplna	papilin a, proteoglycan-like sulfated glycoprotein [Source:ZFIN;Acc:ZDB-GENE-070815-4]	groupXV	1547817	1561936	-1	0.154339	-1.13181	0.241196	0.853036	8.59832	0.0351367	0.0968799	9
ENSGACG00000010141			groupXIII	9880102	9881725	-1	-0.797422	-0.206051	0.329775	6.1887	8.59169	0.0352423	0.0971604	7
ENSGACG00000007862	acap3b	ArfGAP with coiled-coil, ankyrin repeat and PH domains 3b [Source:ZFIN;Acc:ZDB-GENE-070209-274]	groupXVII	6859969	6880888	1	-0.00386792	0.250477	-0.105022	6.01153	8.58562	0.0353391	0.0974114	11
ENSGACG00000014805	pnoca	prepronociceptin a [Source:ZFIN;Acc:ZDB-GENE-101229-1]	groupII	5013464	5023141	-1	0.141614	-0.173802	-0.486997	4.22099	8.57151	0.0355653	0.0980187	7
ENSGACG00000012682			groupXX	14354575	14362816	1	0.760789	-1.00832	-0.0472408	1.00251	8.56887	0.0356076	0.0981248	6
ENSGACG00000002938	b3galt4	UDP-Gal:betaGlcNAc beta 1,3-galactosyltransferase, polypeptide 4 [Source:ZFIN;Acc:ZDB-GENE-081104-482]	groupXII	1058852	1061564	-1	0.0433409	-0.338765	0.51317	2.58218	8.56389	0.0356879	0.0983352	7
ENSGACG00000005495	ajap1	adherens junctions associated protein 1 [Source:ZFIN;Acc:ZDB-GENE-041210-353]	groupXII	6111169	6129722	1	0.0139267	0.427389	-0.0207686	5.12429	8.56204	0.0357177	0.0984014	11
ENSGACG00000005953	IL17RB	interleukin 17 receptor B [Source:HGNC Symbol;Acc:HGNC:18015]	groupXII	7417469	7419346	-1	-0.849664	-0.483895	0.621509	0.176299	8.55967	0.0357561	0.0984963	7
ENSGACG00000018044			scaffold_164	131166	155947	-1	-0.648836	-1.00279	0.140423	-0.436252	8.54395	0.0360109	0.0991767	9
ENSGACG00000012997	plch2a	phospholipase C, eta 2a [Source:ZFIN;Acc:ZDB-GENE-030131-6367]	groupXII	17297684	17327439	1	-0.0360592	0.421372	0.0393531	5.18551	8.54116	0.0360564	0.099291	11
ENSGACG00000014599			groupXIII	19365872	19378410	-1	-0.371141	-1.29573	-0.691012	2.52005	8.53654	0.0361317	0.0994876	9
ENSGACG00000017653	TACR3 (1 of 2)	tachykinin receptor 3 [Source:HGNC Symbol;Acc:HGNC:11528]	groupIX	8567630	8572176	1	-1.73177	-0.939836	1.04353	-1.29058	8.52793	0.0362726	0.0998539	9
ENSGACG00000001987	gsk3aa	glycogen synthase kinase 3 alpha a [Source:ZFIN;Acc:ZDB-GENE-060503-796]	groupX	1233473	1241626	1	-0.16931	0.275385	-0.143447	4.60105	8.52485	0.0363231	0.0999874	11
