# Supplementary material for: Temporal dynamics of neurogenomic plasticity in response to social interactions in male threespined sticklebacks
Source: PLoS Genet. 2017 Jul 13;13(7):e1006840. doi: 10.1371/journal.pgen.1006840 (PMC5509087; doi:10.1371/journal.pgen.1006840)
Supplement: S5 Table — GO terms were further summarized according to their biological significance in the ‘comments’ column. (XLSX) [file pgen.1006840.s007.xlsx]

## Sheet: D.DEGx.BP
GO.ID	Desc	Comments	clus.2..txt	clus.3..txt	clus.4..txt	clus.5..txt	clus.6..txt	clus.7..txt	clus.8..txt	clus.9..txt	clus.10..txt	clus.11..txt	clus.12..txt	clus.13..txt
GO:0051301	cell division	Cell Division	1	1	1	1	1	1	1	0.00024	1	1	1	1
GO:0000910	cytokinesis	Cell Division	1	1	1	1	1	1	1	0.00024	1	1	1	1
GO:0006308	DNA catabolic process	energy metabolism	1	1	1	1	1	1	1	0.00048	1	1	1	1
GO:0006928	movement of cell or subcellular component		1	1	1	1	1	1	1	0.00053	1	1	1	1
GO:0006950	response to stress	Stress Response	1	1	1	1	1	1	1	0.00089	1	1	1	1
GO:0002376	immune system process	Immune Response	1	1	1	1	0.0029	1	0.0071	0.00097	1	1	1	1
GO:0006955	immune response	Immune Response	1	1	1	1	0.00067	1	1	0.00445	1	1	1	1
GO:0007160	cell-matrix adhesion	Axon Guidance	1	1	1	1	1	1	0.0017	1	1	1	1	1
GO:0031589	cell-substrate adhesion	Axon Guidance	1	1	1	1	1	1	0.0017	1	1	1	1	1
GO:0006968	cellular defense response	Immune Response	1	1	1	1	1	1	0.0028	1	1	1	1	1
GO:0006952	defense response	Immune Response	1	1	1	1	1	1	0.0032	1	1	1	1	1
GO:0006865	amino acid transport	Transport	1	1	1	0.0028	1	1	1	1	1	1	1	1
GO:0046942	carboxylic acid transport	Transport	1	1	1	0.0028	1	1	1	1	1	1	1	1
GO:0015849	organic acid transport	Transport	1	1	1	0.0028	1	1	1	1	1	1	1	1
GO:0015711	organic anion transport	Transport	1	1	1	0.0028	1	1	1	1	1	1	1	1
GO:0009628	response to abiotic stimulus	Stress Response	1	1	1	0.0031	1	1	1	1	1	1	0.0067	1
GO:0006812	cation transport	Transport	1	1	1	0.0036	1	1	1	1	1	1	1	1
GO:0009187	cyclic nucleotide metabolic process	energy metabolism	1	1	0.0023	1	1	1	1	1	1	1	1	1
GO:0044707	single-multicellular organism process		1	0.00144	0.0044	1	1	1	1	1	1	1	1	1
GO:0044699	single-organism process		0.00067	1	0.0046	1	0.00058	1	1	1	0.0038	1	0.0092	0.0046
GO:0032501	multicellular organismal process		1	0.00229	0.0069	1	1	1	1	1	1	1	1	1
GO:0044763	single-organism cellular process		1	1	0.0076	1	1	1	1	1	0.0023	1	1	1
GO:0044767	single-organism developmental process	development	1	0.00035	1	1	1	1	1	1	1	1	1	1
GO:0048731	system development	development	1	0.00044	1	1	1	1	1	1	1	1	1	0.0094
GO:0003008	system process		1	0.00048	1	1	1	1	1	1	1	1	1	1
GO:0048856	anatomical structure development	development	1	0.00075	1	1	1	1	1	1	1	1	1	1
GO:0007275	multicellular organism development	development	1	0.00095	1	1	1	1	1	1	1	1	1	1
GO:0007498	mesoderm development	development	1	0.00147	1	1	1	1	1	1	1	1	1	1
GO:0032502	developmental process		1	0.00189	1	1	1	1	1	1	1	1	1	1
GO:0055074	calcium ion homeostasis	ion homeostasis	1	0.00312	1	1	1	1	1	1	1	1	1	1
GO:0055080	cation homeostasis	ion homeostasis	1	0.00312	1	1	1	1	1	1	1	1	1	1
GO:0006874	cellular calcium ion homeostasis	ion homeostasis	1	0.00312	1	1	1	1	1	1	1	1	1	1
GO:0030003	cellular cation homeostasis	ion homeostasis	1	0.00312	1	1	1	1	1	1	1	1	1	1
GO:0072503	cellular divalent inorganic cation homeostasis	ion homeostasis	1	0.00312	1	1	1	1	1	1	1	1	1	1
GO:0006873	cellular ion homeostasis	ion homeostasis	1	0.00312	1	1	1	1	1	1	1	1	1	1
GO:0006875	cellular metal ion homeostasis	ion homeostasis	1	0.00312	1	1	1	1	1	1	1	1	1	1
GO:0072507	divalent inorganic cation homeostasis	ion homeostasis	1	0.00312	1	1	1	1	1	1	1	1	1	1
GO:0098771	inorganic ion homeostasis	ion homeostasis	1	0.00312	1	1	1	1	1	1	1	1	1	1
GO:0050801	ion homeostasis	ion homeostasis	1	0.00312	1	1	1	1	1	1	1	1	1	1
GO:0055065	metal ion homeostasis	ion homeostasis	1	0.00312	1	1	1	1	1	1	1	1	1	1
GO:0032989	cellular component morphogenesis	development	1	0.00584	1	1	1	1	1	1	1	1	1	1
GO:0007398	ectoderm development	development	1	1	1	1	1	1	1	1	1	1	1	0.0036
GO:0009888	tissue development	development	1	1	1	1	1	1	1	1	1	1	1	0.0043
GO:0006811	ion transport	ion transport	1	1	1	1	1	1	1	1	0.0059	1	1	0.0047
GO:0042592	homeostatic process	homeostasis	1	1	1	1	1	1	1	1	1	1	0.0013	1
GO:0065008	regulation of biological quality		1	1	1	1	1	1	1	1	1	1	0.006	1
GO:0051726	regulation of cell cycle	cell Division	1	1	1	1	1	1	1	1	1	1	0.0067	1
GO:0006909	phagocytosis	phagocytosis	1	1	1	1	1	1	1	1	1	0.0094	1	1
GO:0051234	establishment of localization		1	1	1	1	1	1	1	1	0.0088	1	1	1
GO:0006810	transport	ion transport	1	1	1	1	1	1	1	1	0.0088	1	1	1
GO:0006508	proteolysis	proteolysis	1	1	1	1	1	0.0004	1	1	1	1	1	1
GO:0065007	biological regulation		1	1	1	1	1	0.0076	1	1	1	1	1	1
GO:0050790	regulation of catalytic activity	regulation of catalytic activity	1	1	1	1	1	0.0099	1	1	1	1	1	1
GO:0002250	adaptive immune response	Immune Response	1	1	1	1	0.00048	1	1	1	1	1	1	1
GO:0002460	adaptive immune response based on somatic recombination of immune receptors built from immunoglobulin superfamily domains	Immune Response	1	1	1	1	0.00048	1	1	1	1	1	1	1
GO:0019724	B cell mediated immunity	Immune Response	1	1	1	1	0.00048	1	1	1	1	1	1	1
GO:0002443	leukocyte mediated immunity	Immune Response	1	1	1	1	0.00048	1	1	1	1	1	1	1
GO:0002449	lymphocyte mediated immunity	Immune Response	1	1	1	1	0.00048	1	1	1	1	1	1	1
GO:0050953	sensory perception of light stimulus		1	1	1	1	0.00133	1	1	1	1	1	1	1
GO:0007601	visual perception		1	1	1	1	0.00133	1	1	1	1	1	1	1
GO:0042116	macrophage activation	Immune Response	1	1	1	1	0.00161	1	1	1	1	1	1	1
GO:0002274	myeloid leukocyte activation	Immune Response	1	1	1	1	0.00161	1	1	1	1	1	1	1
GO:0009607	response to biotic stimulus	Stress Response	1	1	1	1	0.00234	1	1	1	1	1	1	1
GO:0001775	cell activation		1	1	1	1	0.00244	1	1	1	1	1	1	1
GO:0045321	leukocyte activation	Immune Response	1	1	1	1	0.00244	1	1	1	1	1	1	1
GO:0002252	immune effector process	Immune Response	1	1	1	1	0.0029	1	1	1	1	1	1	1
GO:0046649	lymphocyte activation	Immune Response	1	1	1	1	0.0035	1	1	1	1	1	1	1
GO:0030101	natural killer cell activation	Immune Response	1	1	1	1	0.0035	1	1	1	1	1	1	1
GO:0007596	blood coagulation	Stress Response	0.0051	1	1	1	1	1	1	1	1	1	1	1
GO:0050817	coagulation	Stress Response	0.0051	1	1	1	1	1	1	1	1	1	1	1
GO:0007599	hemostasis	Stress Response	0.0051	1	1	1	1	1	1	1	1	1	1	1
GO:0050878	regulation of body fluid levels	Stress Response	0.0051	1	1	1	1	1	1	1	1	1	1	1
GO:0009611	response to wounding	Stress Response	0.0051	1	1	1	1	1	1	1	1	1	1	1
GO:0042060	wound healing	Stress Response	0.0051	1	1	1	1	1	1	1	1	1	1	1

## Sheet: T.DEGx.BP
GO.ID	Desc	Comments	clus.1..txt	clus.2..txt	clus.3..txt	clus.4..txt	clus.5..txt	clus.6..txt	clus.7..txt	clus.8..txt	clus.9..txt	clus.10..txt	clus.11..txt	clus.12..txt
GO:0006955	immune response	Immune Response	1	1	1	1	1	1	1	1	1	1	1	0.00046
GO:0046031	ADP metabolic process	metabolism	1	1	1	1	1	1	1	1	1	1	1	0.00368
GO:0006757	ATP generation from ADP	metabolism	1	1	1	1	1	1	1	1	1	1	1	0.00368
GO:0016052	carbohydrate catabolic process	energy metabolism	1	1	1	1	1	1	1	1	1	1	1	0.00368
GO:0006096	glycolytic process	anaerobic energy production	1	1	1	1	1	1	1	1	1	1	1	0.00368
GO:0009132	nucleoside diphosphate metabolic process		1	1	1	1	1	1	1	1	1	1	1	0.00368
GO:0006165	nucleoside diphosphate phosphorylation		1	1	1	1	1	1	1	1	1	1	1	0.00368
GO:0046939	nucleotide phosphorylation		1	1	1	1	1	1	1	1	1	1	1	0.00368
GO:0009135	purine nucleoside diphosphate metabolic process	oxidative phosphorylation	1	1	1	1	1	1	1	1	1	1	1	0.00368
GO:0009179	purine ribonucleoside diphosphate metabolic process	oxidative phosphorylation	1	1	1	1	1	1	1	1	1	1	1	0.00368
GO:0006090	pyruvate metabolic process	energy metabolism	1	1	1	1	1	1	1	1	1	1	1	0.00368
GO:0009185	ribonucleoside diphosphate metabolic process		1	1	1	1	1	1	1	1	1	1	1	0.00368
GO:0044724	single-organism carbohydrate catabolic process		1	1	1	1	1	1	1	1	1	1	1	0.00368
GO:0044281	small molecule metabolic process	metabolism	1	1	0.00697	1	1	1	1	1	1	1	1	0.00468
GO:0019752	carboxylic acid metabolic process	energy metabolism	1	1	1	1	1	0.0024	1	1	1	1	1	0.0048
GO:0006082	organic acid metabolic process		1	1	1	1	1	0.0024	1	1	1	1	1	0.0048
GO:0043436	oxoacid metabolic process		1	1	1	1	1	0.0024	1	1	1	1	1	0.0048
GO:0046496	nicotinamide nucleotide metabolic process		1	1	1	1	1	1	1	1	1	1	1	0.00512
GO:0006733	oxidoreduction coenzyme metabolic process	metabolism	1	1	1	1	1	1	1	1	1	1	1	0.00512
GO:0019362	pyridine nucleotide metabolic process		1	1	1	1	1	1	1	1	1	1	1	0.00512
GO:0072524	pyridine-containing compound metabolic process		1	1	1	1	1	1	1	1	1	1	1	0.00512
GO:0006631	fatty acid metabolic process	metabolism	1	1	1	1	1	1	1	1	1	1	1	0.00643
GO:0002376	immune system process	Immune Response	1	1	1	1	1	1	1	1	0.0027	1	1	0.00791
GO:0072521	purine-containing compound metabolic process	oxidative phosphorylation	1	1	1	1	1	1	1	1	1	1	1	0.00883
GO:0072358	cardiovascular system development	development	1	1	1	1	1	1	1	1	1	1	0.00012	1
GO:0072359	circulatory system development	development	1	1	1	1	1	1	1	1	1	1	0.00012	1
GO:0007275	multicellular organism development	development	1	1	1	1	1	1	1	1	1	1	0.00013	1
GO:0050954	sensory perception of mechanical stimulus		1	1	1	1	1	1	1	1	1	1	0.00021	1
GO:0007605	sensory perception of sound	sensory behavior	1	1	1	1	1	1	1	1	1	1	0.00021	1
GO:0048856	anatomical structure development	development	1	1	1	1	1	1	1	1	1	1	0.00027	1
GO:0044767	single-organism developmental process		1	1	1	1	1	1	1	1	1	1	0.00069	1
GO:0006936	muscle contraction	actin/myosin complex activity	1	1	1	1	1	1	1	1	1	1	0.00073	1
GO:0003012	muscle system process	actin/myosin complex activity	1	1	1	1	1	1	1	1	1	1	0.00073	1
GO:0009888	tissue development		1	0.00547	1	1	1	1	1	1	1	1	0.001	1
GO:0007498	mesoderm development	development	1	1	1	1	1	1	1	1	1	1	0.00138	1
GO:0032502	developmental process	development	1	1	1	1	0.0067	1	1	1	1	1	0.00178	1
GO:0032501	multicellular organismal process		1	1	1	1	1	1	1	1	1	1	0.00238	1
GO:0044699	single-organism process		1	1	0.00033	1	1	1	1	1	1	1	0.00246	1
GO:0044707	single-multicellular organism process		1	1	1	1	1	1	1	1	1	1	0.00367	1
GO:0050789	regulation of biological process		1	1	1	1	1	1	1	1	1	1	0.0047	1
GO:0048646	anatomical structure formation involved in morphogenesis	development	1	1	1	1	1	1	1	1	1	1	0.0052	1
GO:0001525	angiogenesis		1	1	1	1	1	1	1	1	1	1	0.0052	1
GO:0001568	blood vessel development	development	1	1	1	1	1	1	1	1	1	1	0.0052	1
GO:0048514	blood vessel morphogenesis	development	1	1	1	1	1	1	1	1	1	1	0.0052	1
GO:0001944	vasculature development		1	1	1	1	1	1	1	1	1	1	0.0052	1
GO:0007154	cell communication	cell communication	1	1	1	1	1	1	1	1	1	1	0.00634	1
GO:0051641	cellular localization		1	1	1	1	1	1	1	1	1	1	0.00858	1
GO:0051649	establishment of localization in cell		1	1	1	1	1	1	1	1	1	1	0.00858	1
GO:0033500	carbohydrate homeostasis	energy homeostasis	1	1	1	1	1	1	1	1	0.0038	1	1	1
GO:0001678	cellular glucose homeostasis	energy homeostasis	1	1	1	1	1	1	1	1	0.0038	1	1	1
GO:0042593	glucose homeostasis	energy homeostasis	1	1	1	1	1	1	1	1	0.0038	1	1	1
GO:0050896	response to stimulus		1	1	1	1	1	1	1	1	0.0085	1	1	1
GO:0055074	calcium ion homeostasis	ion homeostasis	1	1	1	1	1	1	1	0.0019	1	1	1	1
GO:0055080	cation homeostasis	ion homeostasis	1	1	1	1	1	1	1	0.0019	1	1	1	1
GO:0006874	cellular calcium ion homeostasis	ion homeostasis	1	1	1	1	1	1	1	0.0019	1	1	1	1
GO:0030003	cellular cation homeostasis	ion homeostasis	1	1	1	1	1	1	1	0.0019	1	1	1	1
GO:0072503	cellular divalent inorganic cation homeostasis	ion homeostasis	1	1	1	1	1	1	1	0.0019	1	1	1	1
GO:0006873	cellular ion homeostasis	ion homeostasis	1	1	1	1	1	1	1	0.0019	1	1	1	1
GO:0006875	cellular metal ion homeostasis	ion homeostasis	1	1	1	1	1	1	1	0.0019	1	1	1	1
GO:0072507	divalent inorganic cation homeostasis	ion homeostasis	1	1	1	1	1	1	1	0.0019	1	1	1	1
GO:0098771	inorganic ion homeostasis	ion homeostasis	1	1	1	1	1	1	1	0.0019	1	1	1	1
GO:0050801	ion homeostasis	ion homeostasis	1	1	1	1	1	1	1	0.0019	1	1	1	1
GO:0055065	metal ion homeostasis	ion homeostasis	1	1	1	1	1	1	1	0.0019	1	1	1	1
GO:0007517	muscle organ development	axonal cytoskeleton remodelling	1	0.00722	1	1	0.0036	1	1	0.0024	1	1	1	1
GO:0061061	muscle structure development	axonal cytoskeleton remodelling	1	0.00722	1	1	0.0036	1	1	0.0024	1	1	1	1
GO:0042592	homeostatic process		1	1	1	1	1	1	0.0043	1	1	1	1	1
GO:0006520	cellular amino acid metabolic process	metabolism	1	1	1	1	1	0.0027	1	1	1	1	1	1
GO:0050953	sensory perception of light stimulus		1	1	1	1	1	0.0054	1	1	1	1	1	1
GO:0007601	visual perception	sensory behavior	1	1	1	1	1	0.0054	1	1	1	1	1	1
GO:1901564	organonitrogen compound metabolic process		1	1	1	1	1	0.0067	1	1	1	1	1	1
GO:0006508	proteolysis	proteolysis	1	1	1	1	1	0.0081	1	1	1	1	1	1
GO:0009566	fertilization		1	1	1	1	0.0048	1	1	1	1	1	1	1
GO:0007610	behavior	sensory behavior	1	1	1	0.0087	1	1	1	1	1	1	1	1
GO:0055086	nucleobase-containing small molecule metabolic process		1	1	0.00031	1	1	1	1	1	1	1	1	1
GO:0019637	organophosphate metabolic process	metabolism	1	1	0.00149	1	1	1	1	1	1	1	1	1
GO:0009889	regulation of biosynthetic process		1	0.00012	1	1	1	1	1	1	1	1	1	1
GO:0031326	regulation of cellular biosynthetic process		1	0.00012	1	1	1	1	1	1	1	1	1	1
GO:2000112	regulation of cellular macromolecule biosynthetic process		1	0.00012	1	1	1	1	1	1	1	1	1	1
GO:0010556	regulation of macromolecule biosynthetic process		1	0.00012	1	1	1	1	1	1	1	1	1	1
GO:0010468	regulation of gene expression	Regulation of Transcription	1	0.00013	1	1	1	1	1	1	1	1	1	1
GO:0060255	regulation of macromolecule metabolic process		1	0.00013	1	1	1	1	1	1	1	1	1	1
GO:0007398	ectoderm development	development	1	0.00023	1	1	1	1	1	1	1	1	1	1
GO:0019219	regulation of nucleobase-containing compound metabolic process		1	0.00024	1	1	1	1	1	1	1	1	1	1
GO:0006366	transcription from RNA polymerase II promoter	Transcription	1	0.00026	1	1	1	1	1	1	1	1	1	1
GO:0019438	aromatic compound biosynthetic process		1	0.00039	1	1	1	1	1	1	1	1	1	1
GO:0018130	heterocycle biosynthetic process	metabolism	1	0.00039	1	1	1	1	1	1	1	1	1	1
GO:0097659	nucleic acid-templated transcription	transcription	1	0.00039	1	1	1	1	1	1	1	1	1	1
GO:0034654	nucleobase-containing compound biosynthetic process		1	0.00039	1	1	1	1	1	1	1	1	1	1
GO:1901362	organic cyclic compound biosynthetic process		1	0.00039	1	1	1	1	1	1	1	1	1	1
GO:0032774	RNA biosynthetic process		1	0.00039	1	1	1	1	1	1	1	1	1	1
GO:0006351	transcription, DNA-templated	Transcription	1	0.00039	1	1	1	1	1	1	1	1	1	1
GO:0007379	segment specification	development	1	0.00045	1	1	1	1	1	1	1	1	1	1
GO:0035282	segmentation		1	0.00045	1	1	1	1	1	1	1	1	1	1
GO:0051171	regulation of nitrogen compound metabolic process		1	0.00062	1	1	1	1	1	1	1	1	1	1
GO:0080090	regulation of primary metabolic process		1	0.00063	1	1	1	1	1	1	1	1	1	1
GO:0031323	regulation of cellular metabolic process		1	0.00082	1	1	1	1	1	1	1	1	1	1
GO:0007399	nervous system development	development	1	0.00086	1	1	1	1	1	1	1	1	1	1
GO:0050794	regulation of cellular process		1	0.00121	1	1	1	1	1	1	1	1	1	1
GO:0003002	regionalization		1	0.00128	1	1	1	1	1	1	1	1	1	1
GO:0007389	pattern specification process	development	1	0.00152	1	1	1	1	1	1	1	1	1	1
GO:0016070	RNA metabolic process		1	0.00167	1	1	1	1	1	1	1	1	1	1
GO:0044271	cellular nitrogen compound biosynthetic process	metabolism	1	0.00221	1	1	1	1	1	1	1	1	1	1
GO:0001501	skeletal system development	development	1	0.00253	1	1	1	1	1	1	1	1	1	1
GO:0010467	gene expression	Regulation of Transcription	1	0.00365	1	1	1	1	1	1	1	1	1	1
GO:0090304	nucleic acid metabolic process		1	0.00405	1	1	1	1	1	1	1	1	1	1
GO:0034645	cellular macromolecule biosynthetic process	metabolism	1	0.00563	1	1	1	1	1	1	1	1	1	1
GO:0009059	macromolecule biosynthetic process	metabolism	1	0.00563	1	1	1	1	1	1	1	1	1	1
GO:1901576	organic substance biosynthetic process		1	0.00804	1	1	1	1	1	1	1	1	1	1
GO:0044249	cellular biosynthetic process		1	0.00874	1	1	1	1	1	1	1	1	1	1
GO:0019222	regulation of metabolic process		1	0.00988	1	1	1	1	1	1	1	1	1	1
GO:0006928	movement of cell or subcellular component		0.0067	1	1	1	1	1	1	1	1	1	1	1
