# Supplementary material for: Temporal dynamics of neurogenomic plasticity in response to social interactions in male threespined sticklebacks
Source: PLoS Genet. 2017 Jul 13;13(7):e1006840. doi: 10.1371/journal.pgen.1006840 (PMC5509087; doi:10.1371/journal.pgen.1006840)
Supplement: S8 Table — There are separate tabs for each individual replicate compared to corresponding input, DAPs at 30 and 120 minutes, and for baseline peaks at 30 and 120 minutes. (XLSX) [file pgen.1006840.s010.xlsx]

## Sheet: Dap30
ensembl_gene_id	peak	chr	start	end	fc	p	bgexp
ENSGACG00000000064	scaffold_99-78	scaffold_99	137897	138093	2.91	1.43e-05	E
ENSGACG00000000075	scaffold_99-31	scaffold_99	246165	246361	2.54	8.34e-07	E
ENSGACG00000000079	scaffold_99-31	scaffold_99	246165	246361	2.54	8.34e-07	E
ENSGACG00000000245	scaffold_369-4	scaffold_369	14453	14649	2.5	3.27e-05	E
ENSGACG00000000319	scaffold_27-543	scaffold_27	125037	125233	2.71	9.4e-05	C
ENSGACG00000000340	scaffold_27-414	scaffold_27	203807	204003	2.2	4.02e-05	C
ENSGACG00000000472	scaffold_27-285	scaffold_27	988140	988336	2.88	2.08e-08	E
ENSGACG00000000486	scaffold_27-285	scaffold_27	988140	988336	2.88	2.08e-08	E
ENSGACG00000000617	scaffold_27-327	scaffold_27	1411735	1411931	2.52	8.87e-06	C
ENSGACG00000000618	scaffold_27-327	scaffold_27	1411735	1411931	2.52	8.87e-06	C
ENSGACG00000000653	scaffold_27-341	scaffold_27	1598003	1598199	2.18	1.78e-05	E
ENSGACG00000000698	scaffold_47-56	scaffold_47	6926	7122	2.22	1.8e-05	C
ENSGACG00000000731	scaffold_47-41	scaffold_47	205491	205687	2.34	1.31e-07	C
ENSGACG00000000751	scaffold_47-121	scaffold_47	276710	276906	7.77	5.25e-13	E
ENSGACG00000000769	scaffold_177-5	scaffold_177	102982	103178	3.96	1.4e-06	C
ENSGACG00000000877	scaffold_47-129	scaffold_47	1185357	1185553	4.01	4.89e-06	C
ENSGACG00000001103	scaffold_150-21	scaffold_150	154522	154718	2.02	2.76e-05	E
ENSGACG00000001244	scaffold_891-1	scaffold_891	5054	5250	3.36	2.77e-08	C
ENSGACG00000001328	scaffold_115-7	scaffold_115	24166	24362	2.18	6.01e-05	C
ENSGACG00000001382	scaffold_27-377	scaffold_27	4113696	4113892	2.56	1.7e-06	C
ENSGACG00000001411	scaffold_115-5	scaffold_115	309658	309854	2.43	8.88e-07	E
ENSGACG00000001413	scaffold_219-13	scaffold_219	75833	76029	2.61	1.96e-06	E
ENSGACG00000001415	scaffold_115-5	scaffold_115	309658	309854	2.43	8.88e-07	E
ENSGACG00000001443	scaffold_111-26	scaffold_111	133683	133879	3.4	6.9e-05	C
ENSGACG00000001452	scaffold_111-26	scaffold_111	133683	133879	3.4	6.9e-05	C
ENSGACG00000001478	scaffold_27-553	scaffold_27	4244400	4244596	3.48	5.19e-07	E
ENSGACG00000001561	scaffold_27-323	scaffold_27	4558183	4558379	2.06	5.34e-05	E
ENSGACG00000001637	scaffold_106-8	scaffold_106	300746	300942	2.02	4.4e-05	E
ENSGACG00000001666	groupXXI-1027	groupXXI	589933	590129	3.33	1.84e-06	E
ENSGACG00000001695	scaffold_122-14	scaffold_122	28844	29040	3.06	1.06e-06	E
ENSGACG00000001704	scaffold_122-14	scaffold_122	28844	29040	3.06	1.06e-06	E
ENSGACG00000001909	groupX-696	groupX	284120	284316	2.19	8.09e-06	C
ENSGACG00000001909	groupX-1781	groupX	268387	268583	3.46	5.18e-06	C
ENSGACG00000001926	groupXVI-1498	groupXVI	3044760	3044956	3	8.93e-05	E
ENSGACG00000001995	scaffold_128-12	scaffold_128	156531	156727	2.9	4.08e-08	C
ENSGACG00000001996	scaffold_128-12	scaffold_128	156531	156727	2.9	4.08e-08	C
ENSGACG00000002120	groupXIX-509	groupXIX	580584	580780	2.18	6.01e-05	C
ENSGACG00000002145	groupXXI-880	groupXXI	2952469	2952665	2.95	1.14e-05	C
ENSGACG00000002155	groupXXI-880	groupXXI	2952469	2952665	2.95	1.14e-05	C
ENSGACG00000002168	groupXVI-646	groupXVI	4079830	4080026	2.52	8.87e-06	C
ENSGACG00000002286	groupXXI-1167	groupXXI	3824310	3824506	4.5	5.22e-07	E
ENSGACG00000002487	groupXIX-323	groupXIX	1299366	1299562	3.07	2.72e-11	C
ENSGACG00000002542	groupV-1134	groupV	1204234	1204430	2.78	4.24e-05	E
ENSGACG00000002631	groupXXI-261	groupXXI	6009096	6009292	2.44	9.39e-08	E
ENSGACG00000002636	groupXXI-261	groupXXI	6009096	6009292	2.44	9.39e-08	E
ENSGACG00000002664	groupXII-1970	groupXII	480440	480636	3	8.93e-05	E
ENSGACG00000002717	groupXII-962	groupXII	581552	581748	2.12	3.95e-05	E
ENSGACG00000002804	groupVI-1354	groupVI	1492485	1492681	2.62	6.68e-05	C
ENSGACG00000002809	groupV-1234	groupV	1943547	1943743	5.83	1.2e-10	E
ENSGACG00000002813	groupV-1234	groupV	1943547	1943743	5.83	1.2e-10	E
ENSGACG00000002845	groupXXI-894	groupXXI	7170963	7171159	2.65	1.88e-05	E
ENSGACG00000002926	groupXII-1163	groupXII	1057330	1057526	4.54	2.57e-11	E
ENSGACG00000002932	groupXVI-741	groupXVI	7264701	7264897	2.12	3.95e-05	E
ENSGACG00000002932	groupXVI-1390	groupXVI	7253653	7253849	3.33	1.84e-06	E
ENSGACG00000002938	groupXII-1163	groupXII	1057330	1057526	4.54	2.57e-11	E
ENSGACG00000002964	groupXXI-760	groupXXI	7288118	7288314	2.36	3.34e-05	E
ENSGACG00000003078	groupX-562	groupX	3796475	3796671	2.07	2.08e-05	E
ENSGACG00000003151	groupXXI-900	groupXXI	7616765	7616961	2.78	4.24e-05	E
ENSGACG00000003216	groupVI-1582	groupVI	2812680	2812876	3.78	5.42e-06	C
ENSGACG00000003279	groupXIX-1205	groupXIX	3192586	3192782	3.15	5.69e-05	C
ENSGACG00000003344	groupXVI-1902	groupXVI	7679989	7680185	16.04	1.87e-14	C
ENSGACG00000003351	groupXII-1166	groupXII	1955591	1955787	3.28	2.27e-08	E
ENSGACG00000003354	groupXII-1166	groupXII	1955591	1955787	3.28	2.27e-08	E
ENSGACG00000003355	groupXVI-1902	groupXVI	7679989	7680185	16.04	1.87e-14	C
ENSGACG00000003359	groupXII-705	groupXII	1989899	1990095	2.36	1.9e-07	C
ENSGACG00000003513	groupXVII-1655	groupXVII	790913	791109	3.3	1.76e-05	C
ENSGACG00000003522	groupXVII-1655	groupXVII	790913	791109	3.3	1.76e-05	C
ENSGACG00000003613	groupXII-1440	groupXII	2327738	2327934	2.4	8.21e-05	C
ENSGACG00000003679	groupXX-895	groupXX	1442654	1442850	2.77	2.54e-07	E
ENSGACG00000003738	groupXXI-698	groupXXI	8636279	8636475	2.57	1.26e-05	C
ENSGACG00000003745	groupXVI-617	groupXVI	8523321	8523517	2.29	2.57e-05	C
ENSGACG00000003807	groupV-1353	groupV	4413391	4413587	3.18	2.75e-05	E
ENSGACG00000003910	groupXVII-545	groupXVII	1375943	1376139	2.99	5.23e-08	C
ENSGACG00000003937	groupX-1806	groupX	5439855	5440051	6.36	1.48e-09	E
ENSGACG00000003978	groupXVI-450	groupXVI	8907208	8907404	2.33	5.61e-07	E
ENSGACG00000003992	groupXVI-450	groupXVI	8907208	8907404	2.33	5.61e-07	E
ENSGACG00000004041	groupVI-1182	groupVI	4383546	4383742	2.83	8.65e-06	C
ENSGACG00000004057	groupXVI-1737	groupXVI	9059721	9059917	2.88	6.23e-05	E
ENSGACG00000004062	groupXVI-1737	groupXVI	9059721	9059917	2.88	6.23e-05	E
ENSGACG00000004157	groupXXI-452	groupXXI	9515793	9515989	2.54	2.4e-06	C
ENSGACG00000004163	groupXXI-452	groupXXI	9515793	9515989	2.54	2.4e-06	C
ENSGACG00000004163	groupXXI-1113	groupXXI	9544213	9544409	2.41	8.36e-05	E
ENSGACG00000004176	groupXXI-1113	groupXXI	9544213	9544409	2.41	8.36e-05	E
ENSGACG00000004185	groupXVIII-429	groupXVIII	403285	403481	2.19	8.09e-06	C
ENSGACG00000004217	groupXVIII-429	groupXVIII	403285	403481	2.19	8.09e-06	C
ENSGACG00000004222	groupXVI-1413	groupXVI	9413743	9413939	6.71	2.18e-10	E
ENSGACG00000004281	groupVIII-1061	groupVIII	2413633	2413829	2.66	4.68e-06	C
ENSGACG00000004291	groupXVII-1285	groupXVII	1808920	1809116	2.55	4.69e-05	C
ENSGACG00000004401	groupXVIII-438	groupXVIII	1060923	1061119	2.38	2.32e-07	E
ENSGACG00000004427	groupXVIII-438	groupXVIII	1060923	1061119	2.38	2.32e-07	E
ENSGACG00000004507	groupVI-974	groupVI	5302561	5302757	4.13	3.19e-11	C
ENSGACG00000004533	groupXV-1346	groupXV	615502	615698	2.91	1.43e-05	E
ENSGACG00000004581	groupX-2058	groupX	7086093	7086289	3.4	6.9e-05	C
ENSGACG00000004668	groupXVIII-1229	groupXVIII	1275698	1275894	5.3	3.96e-09	E
ENSGACG00000004681	groupXII-1707	groupXII	4334098	4334294	4.24	1.41e-07	E
ENSGACG00000004685	groupXIII-1227	groupXIII	2173799	2173995	2.36	3.34e-05	E
ENSGACG00000004701	groupXXI-925	groupXXI	10080089	10080285	2.41	8.36e-05	E
ENSGACG00000004706	groupXXI-925	groupXXI	10080089	10080285	2.41	8.36e-05	E
ENSGACG00000004716	groupX-895	groupX	7167542	7167738	2.67	1.24e-06	C
ENSGACG00000004727	groupXVIII-983	groupXVIII	1374800	1374996	2.4	8.21e-05	C
ENSGACG00000004727	groupXVIII-603	groupXVIII	1388975	1389171	2.31	2.3e-06	C
ENSGACG00000004775	groupXX-1171	groupXX	2689388	2689584	3.42	1.04e-07	C
ENSGACG00000004841	groupXI-452	groupXI	438308	438504	2.02	1.38e-06	C
ENSGACG00000004844	groupXI-452	groupXI	438308	438504	2.02	1.38e-06	C
ENSGACG00000004884	groupVIII-1309	groupVIII	3392479	3392675	3.37	1.35e-06	C
ENSGACG00000004917	groupXIII-1687	groupXIII	2405558	2405754	3.62	1.46e-06	C
ENSGACG00000004992	groupI-452	groupI	787700	787896	2.02	5.55e-07	E
ENSGACG00000004995	groupV-1007	groupV	6049257	6049453	2.64	1.77e-05	C
ENSGACG00000004996	groupI-452	groupI	787700	787896	2.02	5.55e-07	E
ENSGACG00000005034	groupXVII-698	groupXVII	3277481	3277677	2.29	2.57e-05	C
ENSGACG00000005058	groupXVI-1756	groupXVI	10323391	10323587	3.59	1.99e-05	C
ENSGACG00000005162	groupXVIII-194	groupXVIII	2027471	2027667	2.06	1.69e-08	E
ENSGACG00000005206	groupXVIII-194	groupXVIII	2027471	2027667	2.06	1.69e-08	E
ENSGACG00000005214	groupI-924	groupI	965222	965418	2.11	7.93e-06	C
ENSGACG00000005298	groupXX-1002	groupXX	3787282	3787478	2.54	2.4e-06	C
ENSGACG00000005301	groupXX-1002	groupXX	3787282	3787478	2.54	2.4e-06	C
ENSGACG00000005373	groupXVII-547	groupXVII	3637999	3638195	2.03	5.32e-05	C
ENSGACG00000005376	groupXVII-1839	groupXVII	3670006	3670202	2.97	4.44e-05	C
ENSGACG00000005378	groupXVI-1003	groupXVI	10630300	10630496	2.25	8.94e-05	C
ENSGACG00000005378	groupXVI-1297	groupXVI	10638291	10638487	2.91	1.43e-05	E
ENSGACG00000005452	groupXII-1459	groupXII	5940008	5940204	2.73	2.45e-05	C
ENSGACG00000005498	groupXII-966	groupXII	6336522	6336718	2.1	5.75e-05	C
ENSGACG00000005505	groupXVII-1413	groupXVII	3829992	3830188	3.53	2.23e-06	E
ENSGACG00000005512	groupXVII-1413	groupXVII	3829992	3830188	3.53	2.23e-06	E
ENSGACG00000005537	groupXVIII-1557	groupXVIII	2578836	2579032	3.36	8.03e-06	E
ENSGACG00000005548	groupXVII-1844	groupXVII	3878505	3878701	4.72	3.4e-06	C
ENSGACG00000005573	groupVI-608	groupVI	6700008	6700204	2.04	5.02e-06	C
ENSGACG00000005600	groupXX-1915	groupXX	4732642	4732838	3.3	1.76e-05	C
ENSGACG00000005680	groupI-520	groupI	1875423	1875619	2.12	9.4e-07	E
ENSGACG00000005684	groupI-520	groupI	1875423	1875619	2.12	9.4e-07	E
ENSGACG00000005687	groupV-1094	groupV	7503174	7503370	2.97	4.44e-05	C
ENSGACG00000005885	groupVI-1385	groupVI	7076640	7076836	2.4	8.21e-05	C
ENSGACG00000005893	groupVI-1385	groupVI	7076640	7076836	2.4	8.21e-05	C
ENSGACG00000005895	groupX-776	groupX	8538638	8538834	2.01	7.03e-05	E
ENSGACG00000005946	groupVI-852	groupVI	7118062	7118258	2.24	1.24e-05	E
ENSGACG00000005986	groupXVI-954	groupXVI	11594097	11594293	2.22	5.99e-05	C
ENSGACG00000005991	groupXVI-954	groupXVI	11594097	11594293	2.22	5.99e-05	C
ENSGACG00000006049	groupV-1538	groupV	8037869	8038065	6.61	2.07e-07	C
ENSGACG00000006073	groupXVI-1083	groupXVI	11695669	11695865	3.19	1.17e-06	C
ENSGACG00000006100	groupVIII-684	groupVIII	6159722	6159918	2.54	3.28e-07	C
ENSGACG00000006161	groupXX-908	groupXX	5616601	5616797	2.06	8.55e-05	E
ENSGACG00000006189	groupVIII-1658	groupVIII	6450876	6451072	3.78	3.91e-07	C
ENSGACG00000006322	groupX-746	groupX	9013900	9014096	2.53	5.19e-06	E
ENSGACG00000006323	groupX-746	groupX	9013900	9014096	2.53	5.19e-06	E
ENSGACG00000006381	groupV-1541	groupV	8286663	8286859	3.78	1.99e-05	C
ENSGACG00000006398	groupXV-1093	groupXV	2816310	2816506	2.12	6.33e-05	E
ENSGACG00000006413	groupXV-1093	groupXV	2816310	2816506	2.12	6.33e-05	E
ENSGACG00000006486	groupI-1549	groupI	3316233	3316429	2.61	1.96e-06	E
ENSGACG00000006519	groupVIII-1793	groupVIII	6857202	6857398	3.1	1.45e-05	C
ENSGACG00000006527	groupVIII-1793	groupVIII	6857202	6857398	3.1	1.45e-05	C
ENSGACG00000006532	groupXVII-793	groupXVII	5414353	5414549	2.2	4.02e-05	C
ENSGACG00000006587	groupXX-1185	groupXX	7078603	7078799	2.74	6.42e-06	C
ENSGACG00000006587	groupXX-1600	groupXX	6924680	6924876	5.3	4.92e-11	E
ENSGACG00000006602	groupXVIII-1566	groupXVIII	4697896	4698092	3.03	2.02e-05	E
ENSGACG00000006658	groupXI-614	groupXI	3340120	3340316	2.08	5.04e-07	E
ENSGACG00000006669	groupXI-614	groupXI	3340120	3340316	2.08	5.04e-07	E
ENSGACG00000006710	groupXV-553	groupXV	2979891	2980087	2.99	9.2e-11	E
ENSGACG00000006711	groupXV-553	groupXV	2979891	2980087	2.99	9.2e-11	E
ENSGACG00000006741	groupXVII-1731	groupXVII	5577699	5577895	3.6	9.64e-06	E
ENSGACG00000006748	groupXVIII-1000	groupXVIII	5061375	5061571	3.25	9.34e-08	C
ENSGACG00000006748	groupXVIII-1132	groupXVIII	5017008	5017204	2.4	8.21e-05	C
ENSGACG00000006770	groupXVI-1449	groupXVI	13547544	13547740	3.06	1.06e-06	E
ENSGACG00000006927	groupXIX-895	groupXIX	8126920	8127116	2.5	3.27e-05	E
ENSGACG00000006929	groupXIX-895	groupXIX	8126920	8127116	2.5	3.27e-05	E
ENSGACG00000006946	groupXVII-869	groupXVII	5671473	5671669	3.94	9.22e-09	E
ENSGACG00000006965	groupXV-381	groupXV	3707782	3707978	2.45	1.54e-08	C
ENSGACG00000006984	groupXX-748	groupXX	7831486	7831682	2.18	6.01e-05	C
ENSGACG00000006991	groupXII-2283	groupXII	9004440	9004636	4.72	2.48e-07	C
ENSGACG00000007004	groupXX-748	groupXX	7831486	7831682	2.18	6.01e-05	C
ENSGACG00000007041	groupXVII-534	groupXVII	5838067	5838263	2.04	8.02e-05	C
ENSGACG00000007055	groupXVII-534	groupXVII	5838067	5838263	2.04	8.02e-05	C
ENSGACG00000007086	groupVIII-923	groupVIII	7894258	7894454	2.91	1.55e-07	C
ENSGACG00000007086	groupVIII-1667	groupVIII	7880102	7880298	5.19	1.02e-08	C
ENSGACG00000007138	groupXVII-540	groupXVII	5926976	5927172	2.12	9.65e-06	E
ENSGACG00000007204	groupXVII-1123	groupXVII	5977035	5977231	2.4	8.21e-05	C
ENSGACG00000007205	groupXII-641	groupXII	9433647	9433843	2.12	2.37e-06	C
ENSGACG00000007205	groupXII-2052	groupXII	9409959	9410155	3.53	2.23e-06	E
ENSGACG00000007219	groupX-951	groupX	10060919	10061115	2.14	9.03e-05	C
ENSGACG00000007223	groupX-951	groupX	10060919	10061115	2.14	9.03e-05	C
ENSGACG00000007252	groupXIII-1242	groupXIII	6462171	6462367	2.4	5.43e-06	E
ENSGACG00000007265	groupXVII-1211	groupXVII	6025818	6026014	2.4	8.21e-05	C
ENSGACG00000007285	groupVI-575	groupVI	8384376	8384572	2.07	1.3e-05	E
ENSGACG00000007287	groupXI-1372	groupXI	4195730	4195926	2.36	5.58e-05	C
ENSGACG00000007290	groupXI-1372	groupXI	4195730	4195926	2.36	5.58e-05	C
ENSGACG00000007293	groupX-655	groupX	10545963	10546159	3.22	1.72e-09	C
ENSGACG00000007314	groupXI-1372	groupXI	4195730	4195926	2.36	5.58e-05	C
ENSGACG00000007347	groupXVII-570	groupXVII	6127268	6127464	2.43	8.88e-07	E
ENSGACG00000007353	groupXVII-570	groupXVII	6127268	6127464	2.43	8.88e-07	E
ENSGACG00000007372	groupX-1080	groupX	10834009	10834205	2.6	1.23e-05	E
ENSGACG00000007399	groupXIII-2008	groupXIII	7077536	7077732	2.59	7.86e-05	E
ENSGACG00000007406	groupXIII-2008	groupXIII	7077536	7077732	2.59	7.86e-05	E
ENSGACG00000007428	groupI-1991	groupI	5612163	5612359	2.25	8.94e-05	C
ENSGACG00000007441	groupVI-1788	groupVI	8678368	8678564	3.78	3.91e-07	C
ENSGACG00000007541	groupVIII-1632	groupVIII	8551430	8551626	3.36	8.03e-06	E
ENSGACG00000007556	groupXVI-1459	groupXVI	14823260	14823456	3.33	1.84e-06	E
ENSGACG00000007578	groupXVI-1459	groupXVI	14823260	14823456	3.33	1.84e-06	E
ENSGACG00000007616	groupXIII-2421	groupXIII	7283526	7283722	4.72	2.48e-07	C
ENSGACG00000007625	groupXIII-2421	groupXIII	7283526	7283722	4.72	2.48e-07	C
ENSGACG00000007627	groupX-1705	groupX	11452216	11452412	4.24	1.41e-07	E
ENSGACG00000007628	groupXI-951	groupXI	4669989	4670185	2.2	4.02e-05	C
ENSGACG00000007633	groupXI-951	groupXI	4669989	4670185	2.2	4.02e-05	C
ENSGACG00000007723	groupXX-1005	groupXX	9131723	9131919	2.12	3.95e-05	E
ENSGACG00000007749	groupVI-992	groupVI	9147346	9147542	2.32	3.79e-05	C
ENSGACG00000007802	groupVIII-1023	groupVIII	8815248	8815444	2.54	2.4e-06	C
ENSGACG00000007802	groupVIII-1024	groupVIII	8836665	8836861	2.32	3.79e-05	C
ENSGACG00000007816	groupVIII-1213	groupVIII	8846221	8846417	3.58	3.34e-08	E
ENSGACG00000007838	groupVIII-1213	groupVIII	8846221	8846417	3.58	3.34e-08	E
ENSGACG00000008146	groupXX-1192	groupXX	9609965	9610161	2.29	2.57e-05	C
ENSGACG00000008184	groupXV-658	groupXV	5484777	5484973	3.07	2.72e-11	C
ENSGACG00000008193	groupI-2123	groupI	6831322	6831518	2.75	6.68e-06	E
ENSGACG00000008198	groupI-2123	groupI	6831322	6831518	2.75	6.68e-06	E
ENSGACG00000008394	groupXI-2048	groupXI	5270214	5270410	3.1	1.45e-05	C
ENSGACG00000008455	groupX-1024	groupX	12878066	12878262	2.55	4.69e-05	C
ENSGACG00000008471	groupX-649	groupX	12891563	12891759	2.38	3.45e-06	E
ENSGACG00000008473	groupXI-880	groupXI	5453167	5453363	2.04	8.02e-05	C
ENSGACG00000008491	groupXVIII-859	groupXVIII	7951549	7951745	3.91	7.31e-09	C
ENSGACG00000008609	groupVI-572	groupVI	9845120	9845316	2.2	1.63e-06	C
ENSGACG00000008641	groupXI-1305	groupXI	5813416	5813612	2.36	5.58e-05	C
ENSGACG00000008646	groupXVI-440	groupXVI	17326310	17326506	2.08	2.54e-05	C
ENSGACG00000008651	groupXVI-440	groupXVI	17326310	17326506	2.08	2.54e-05	C
ENSGACG00000008669	groupX-1356	groupX	13048970	13049166	2.83	9.85e-06	E
ENSGACG00000008773	groupVIII-1825	groupVIII	10275795	10275991	2.97	4.44e-05	C
ENSGACG00000008773	groupVIII-1220	groupVIII	10183539	10183735	3.48	5.19e-07	E
ENSGACG00000008823	groupXII-1144	groupXII	10937080	10937276	2.83	5.9e-07	C
ENSGACG00000008853	groupX-763	groupX	13428045	13428241	3.26	6.51e-09	C
ENSGACG00000008853	groupX-2153	groupX	13417501	13417697	4.01	4.89e-06	C
ENSGACG00000008895	groupXVIII-534	groupXVIII	8471259	8471455	2.52	5.42e-07	E
ENSGACG00000008899	groupXVII-758	groupXVII	8494254	8494450	2.12	3.95e-05	E
ENSGACG00000008918	groupXI-753	groupXI	6150178	6150374	2.01	7.03e-05	E
ENSGACG00000008984	groupXX-528	groupXX	10491256	10491452	2.32	2.11e-07	C
ENSGACG00000009008	groupXII-1033	groupXII	11193988	11194184	2.18	1.78e-05	E
ENSGACG00000009057	groupXI-733	groupXI	6276140	6276336	2.02	2.35e-05	C
ENSGACG00000009070	groupXI-733	groupXI	6276140	6276336	2.02	2.35e-05	C
ENSGACG00000009135	groupVI-1483	groupVI	10696694	10696890	2.78	4.24e-05	E
ENSGACG00000009378	groupXIX-597	groupXIX	10598301	10598497	2.85	8.79e-08	E
ENSGACG00000009388	groupXIX-597	groupXIX	10598301	10598497	2.85	8.79e-08	E
ENSGACG00000009432	groupXVIII-1621	groupXVIII	9104984	9105180	2.59	7.86e-05	E
ENSGACG00000009524	groupXX-753	groupXX	11293162	11293358	2.69	9.03e-07	C
ENSGACG00000009548	groupVI-705	groupVI	11324146	11324342	2.4	5.43e-06	E
ENSGACG00000009555	groupXVIII-751	groupXVIII	9275497	9275693	2.4	1.56e-05	C
ENSGACG00000009569	groupXII-796	groupXII	11918951	11919147	2.02	3.54e-05	C
ENSGACG00000009574	groupXII-796	groupXII	11918951	11919147	2.02	3.54e-05	C
ENSGACG00000009577	groupVI-705	groupVI	11324146	11324342	2.4	5.43e-06	E
ENSGACG00000009593	groupX-1086	groupX	14704859	14705055	2.94	2.94e-06	C
ENSGACG00000009626	groupXIX-966	groupXIX	10965347	10965543	5.1	1.6e-10	C
ENSGACG00000009642	groupXIX-966	groupXIX	10965347	10965543	5.1	1.6e-10	C
ENSGACG00000009650	groupXV-955	groupXV	7679387	7679583	2.14	9.03e-05	C
ENSGACG00000009691	groupXII-1038	groupXII	12050349	12050545	3.88	1.56e-10	C
ENSGACG00000009748	groupXIX-1349	groupXIX	11106922	11107118	4.45	3.14e-08	E
ENSGACG00000009761	groupI-1171	groupI	9621156	9621352	2.43	8.88e-07	E
ENSGACG00000009806	groupXII-2547	groupXII	12188997	12189193	4.48	1.13e-06	C
ENSGACG00000009828	groupXI-1921	groupXI	7506980	7507176	7.42	4.11e-12	E
ENSGACG00000009852	groupXI-1921	groupXI	7506980	7507176	7.42	4.11e-12	E
ENSGACG00000009891	groupI-3347	groupI	9857151	9857347	4.25	4.89e-06	C
ENSGACG00000009912	groupI-3347	groupI	9857151	9857347	4.25	4.89e-06	C
ENSGACG00000009960	groupX-987	groupX	15307081	15307277	3.44	1.21e-07	E
ENSGACG00000009962	groupX-987	groupX	15307081	15307277	3.44	1.21e-07	E
ENSGACG00000010052	groupXIX-1040	groupXIX	11712261	11712457	6.37	1.57e-12	C
ENSGACG00000010055	groupXVII-1934	groupXVII	10366672	10366868	4.01	4.89e-06	C
ENSGACG00000010066	groupVIII-2014	groupVIII	12809181	12809377	3.46	5.18e-06	C
ENSGACG00000010104	groupVIII-1359	groupVIII	12841365	12841561	2.44	2.26e-05	C
ENSGACG00000010115	groupI-1545	groupI	10115574	10115770	2.2	4.02e-05	C
ENSGACG00000010124	groupVI-1289	groupVI	12310280	12310476	2.59	7.86e-05	E
ENSGACG00000010188	groupXVIII-544	groupXVIII	10121875	10122071	2.2	1.21e-05	C
ENSGACG00000010191	groupXVIII-544	groupXVIII	10121875	10122071	2.2	1.21e-05	C
ENSGACG00000010226	groupI-1066	groupI	10337510	10337706	2.07	2.08e-05	E
ENSGACG00000010266	groupXVIII-1156	groupXVIII	10172142	10172338	2.95	1.14e-05	C
ENSGACG00000010299	groupXVIII-618	groupXVIII	10258005	10258201	2.28	7.91e-06	C
ENSGACG00000010369	groupXIII-1297	groupXIII	10699199	10699395	2.66	4.68e-06	C
ENSGACG00000010372	groupXV-1207	groupXV	8859728	8859924	2.22	5.99e-05	C
ENSGACG00000010375	groupXIII-1297	groupXIII	10699199	10699395	2.66	4.68e-06	C
ENSGACG00000010375	groupXIII-2267	groupXIII	10728005	10728201	4.24	1.41e-07	E
ENSGACG00000010419	groupXIII-722	groupXIII	11343723	11343919	2.24	1.24e-05	E
ENSGACG00000010501	scaffold_185-2	scaffold_185	149274	149470	6.04	2.82e-14	C
ENSGACG00000010522	groupVI-1046	groupVI	13141572	13141768	2.94	3.29e-06	E
ENSGACG00000010555	groupI-2764	groupI	11027300	11027496	3.3	1.76e-05	C
ENSGACG00000010568	groupVIII-1529	groupVIII	13370316	13370512	3.03	2.02e-05	E
ENSGACG00000010593	groupVIII-1529	groupVIII	13370316	13370512	3.03	2.02e-05	E
ENSGACG00000010644	groupXII-1968	groupXII	13538203	13538399	3.78	5.42e-06	C
ENSGACG00000010684	groupI-2306	groupI	11169782	11169978	5.3	4.92e-11	E
ENSGACG00000010693	groupI-1365	groupI	11228651	11228847	2.36	1.07e-05	C
ENSGACG00000010781	groupXVIII-959	groupXVIII	10762017	10762213	5.03	2.56e-12	C
ENSGACG00000010788	groupXII-990	groupXII	13699561	13699757	2.33	3.39e-06	C
ENSGACG00000010800	groupXII-990	groupXII	13699561	13699757	2.33	3.39e-06	C
ENSGACG00000010823	groupXIX-791	groupXIX	12794782	12794978	3.44	1.21e-07	E
ENSGACG00000010854	groupI-3047	groupI	11873590	11873786	3.96	1.4e-06	C
ENSGACG00000010861	groupXIX-372	groupXIX	12862569	12862765	2.12	2.37e-06	C
ENSGACG00000010873	groupXIX-603	groupXIX	12907234	12907430	3.02	9.68e-09	E
ENSGACG00000010878	groupXI-1326	groupXI	8725773	8725969	3.78	5.95e-10	C
ENSGACG00000011008	groupXVIII-1788	groupXVIII	11077583	11077779	4.24	1.41e-07	E
ENSGACG00000011037	groupXV-1438	groupXV	10312437	10312633	3.24	4.53e-06	C
ENSGACG00000011111	groupXIII-1015	groupXIII	12328111	12328307	2.14	9.03e-05	C
ENSGACG00000011127	groupXV-1442	groupXV	10505622	10505818	2.62	6.68e-05	C
ENSGACG00000011157	groupI-2036	groupI	12279572	12279768	3.1	1.45e-05	C
ENSGACG00000011181	groupI-1840	groupI	12311275	12311471	2.71	2.84e-05	E
ENSGACG00000011212	groupXV-1443	groupXV	10604934	10605130	2.83	8.65e-06	C
ENSGACG00000011223	groupI-2527	groupI	12341729	12341925	3.03	2.02e-05	E
ENSGACG00000011235	groupXV-1443	groupXV	10604934	10605130	2.83	8.65e-06	C
ENSGACG00000011251	groupI-2527	groupI	12341729	12341925	3.03	2.02e-05	E
ENSGACG00000011294	groupVIII-1313	groupVIII	14358407	14358603	2.94	3.29e-06	E
ENSGACG00000011299	groupXIII-562	groupXIII	12872853	12873049	2.08	2.37e-06	C
ENSGACG00000011337	groupI-990	groupI	12471543	12471739	2.24	2.69e-05	C
ENSGACG00000011340	groupXIX-644	groupXIX	13779301	13779497	2.36	3.34e-05	E
ENSGACG00000011349	groupXII-1094	groupXII	15136907	15137103	2.69	9.03e-07	C
ENSGACG00000011383	groupI-2771	groupI	12884739	12884935	4.24	1.41e-07	E
ENSGACG00000011397	groupXIX-766	groupXIX	14060489	14060685	2.83	4.45e-07	C
ENSGACG00000011493	groupVIII-944	groupVIII	14636201	14636397	2.38	5.28e-05	E
ENSGACG00000011508	groupVIII-1574	groupVIII	14669360	14669556	3.1	1.45e-05	C
ENSGACG00000011546	groupXIII-1119	groupXIII	13024749	13024945	2.56	8.01e-06	E
ENSGACG00000011564	groupXIX-1070	groupXIX	14641350	14641546	3.1	1.45e-05	C
ENSGACG00000011613	groupXVII-765	groupXVII	12691013	12691209	2.65	2.97e-06	E
ENSGACG00000011618	groupXVII-765	groupXVII	12691013	12691209	2.65	2.97e-06	E
ENSGACG00000011634	groupVIII-432	groupVIII	15009937	15010133	3.46	4.06e-13	E
ENSGACG00000011648	groupVI-558	groupVI	15623588	15623784	2.03	5.32e-05	C
ENSGACG00000011653	groupVIII-432	groupVIII	15009937	15010133	3.46	4.06e-13	E
ENSGACG00000011661	groupXIX-577	groupXIX	14891216	14891412	2.6	1.26e-07	C
ENSGACG00000011681	groupXIX-577	groupXIX	14891216	14891412	2.6	1.26e-07	C
ENSGACG00000011728	groupXII-545	groupXII	15448211	15448407	2.04	6.95e-06	C
ENSGACG00000011730	groupXII-545	groupXII	15448211	15448407	2.04	6.95e-06	C
ENSGACG00000011791	groupXV-1029	groupXV	11607949	11608145	2.74	6.42e-06	C
ENSGACG00000011793	groupXV-1029	groupXV	11607949	11608145	2.74	6.42e-06	C
ENSGACG00000011842	groupXV-1061	groupXV	11653219	11653415	2.25	1.98e-05	E
ENSGACG00000011934	groupXX-1022	groupXX	12928944	12929140	2.42	8.52e-06	E
ENSGACG00000011942	groupXX-1022	groupXX	12928944	12929140	2.42	8.52e-06	E
ENSGACG00000011965	groupXX-627	groupXX	13001194	13001390	2.12	6.05e-06	E
ENSGACG00000011984	groupXVIII-796	groupXVIII	12800204	12800400	2.14	9.03e-05	C
ENSGACG00000011999	groupXIII-2529	groupXIII	13555211	13555407	5.66	1.24e-07	C
ENSGACG00000012022	groupXII-2369	groupXII	15792842	15793038	3.59	1.99e-05	C
ENSGACG00000012041	groupXV-1416	groupXV	11906858	11907054	2.71	2.84e-05	E
ENSGACG00000012177	groupXVIII-1658	groupXVIII	13296689	13296885	3.33	1.84e-06	E
ENSGACG00000012185	groupXVIII-1658	groupXVIII	13296689	13296885	3.33	1.84e-06	E
ENSGACG00000012233	groupXIII-2100	groupXIII	14172980	14173176	2.71	9.4e-05	C
ENSGACG00000012255	groupVIII-890	groupVIII	15468981	15469177	2.89	5.37e-07	E
ENSGACG00000012294	groupVIII-1370	groupVIII	15592994	15593190	2.52	8.87e-06	C
ENSGACG00000012412	groupXIX-1401	groupXIX	15785296	15785492	2.71	2.84e-05	E
ENSGACG00000012443	groupXX-796	groupXX	13682635	13682831	2.31	5.29e-06	E
ENSGACG00000012506	groupVIII-953	groupVIII	15841422	15841618	2.25	1.98e-05	E
ENSGACG00000012539	scaffold_126-10	scaffold_126	57074	57270	2.12	3.72e-07	E
ENSGACG00000012555	groupXIX-735	groupXIX	16012140	16012336	2.32	3.79e-05	C
ENSGACG00000012589	groupXV-733	groupXV	13175140	13175336	2.17	4e-05	C
ENSGACG00000012611	groupIII-699	groupIII	135942	136138	2.58	4.63e-07	C
ENSGACG00000012613	groupIII-699	groupIII	135942	136138	2.58	4.63e-07	C
ENSGACG00000012660	scaffold_98-11	scaffold_98	393229	393425	2.01	7.03e-05	E
ENSGACG00000012729	scaffold_126-24	scaffold_126	163057	163253	4.77	1.08e-07	E
ENSGACG00000012741	groupXI-678	groupXI	12285802	12285998	2.03	6.8e-06	E
ENSGACG00000012745	scaffold_126-24	scaffold_126	163057	163253	4.77	1.08e-07	E
ENSGACG00000012757	groupXI-678	groupXI	12285802	12285998	2.03	6.8e-06	E
ENSGACG00000012787	groupXIX-1267	groupXIX	16568407	16568603	2.62	6.68e-05	C
ENSGACG00000012796	groupXIX-1267	groupXIX	16568407	16568603	2.62	6.68e-05	C
ENSGACG00000012841	scaffold_247-5	scaffold_247	2663	2859	3.78	5.95e-10	C
ENSGACG00000012861	groupXIII-1741	groupXIII	14938609	14938805	4.06	3.66e-08	E
ENSGACG00000012865	groupXIII-1741	groupXIII	14938609	14938805	4.06	3.66e-08	E
ENSGACG00000012871	groupXVIII-431	groupXVIII	14757595	14757791	2.26	3.35e-07	E
ENSGACG00000012875	groupXVIII-431	groupXVIII	14757595	14757791	2.26	3.35e-07	E
ENSGACG00000012907	groupXV-1184	groupXV	14134153	14134349	3.06	1.06e-06	E
ENSGACG00000012910	groupXV-1184	groupXV	14134153	14134349	3.06	1.06e-06	E
ENSGACG00000012958	groupXX-2024	groupXX	14967543	14967739	2.78	4.24e-05	E
ENSGACG00000012985	groupI-1572	groupI	16763839	16764035	2.69	9.03e-07	C
ENSGACG00000013021	groupXX-584	groupXX	15305659	15305855	2.07	3.33e-05	E
ENSGACG00000013035	groupXII-1372	groupXII	17644165	17644361	2.54	5.08e-05	E
ENSGACG00000013069	groupIII-993	groupIII	577429	577625	2.6	3.37e-06	C
ENSGACG00000013073	groupXII-1372	groupXII	17644165	17644361	2.54	5.08e-05	E
ENSGACG00000013075	groupXIII-2115	groupXIII	15948444	15948640	4.95	5.16e-08	C
ENSGACG00000013076	groupXIII-2115	groupXIII	15948444	15948640	4.95	5.16e-08	C
ENSGACG00000013128	groupXX-839	groupXX	15522967	15523163	2.61	1.96e-06	E
ENSGACG00000013144	groupXVIII-657	groupXVIII	15196031	15196227	2.23	4.9e-06	E
ENSGACG00000013144	groupXVIII-885	groupXVIII	15218076	15218272	3.39	6.63e-09	E
ENSGACG00000013145	groupXVIII-885	groupXVIII	15218076	15218272	3.39	6.63e-09	E
ENSGACG00000013157	groupXX-1826	groupXX	15716298	15716494	3.31	4.23e-07	E
ENSGACG00000013171	groupXX-1826	groupXX	15716298	15716494	3.31	4.23e-07	E
ENSGACG00000013182	groupXIX-341	groupXIX	17032784	17032980	2.05	7.52e-06	C
ENSGACG00000013235	groupXIX-1185	groupXIX	17249897	17250093	3.24	4.53e-06	C
ENSGACG00000013251	groupIII-1384	groupIII	1071614	1071810	2.32	3.79e-05	C
ENSGACG00000013253	groupIII-1384	groupIII	1071614	1071810	2.32	3.79e-05	C
ENSGACG00000013255	groupXV-1520	groupXV	15760545	15760741	2.83	9.85e-06	E
ENSGACG00000013261	groupXV-924	groupXV	15896811	15897007	2.04	8.02e-05	C
ENSGACG00000013324	groupXII-830	groupXII	18288072	18288268	2.02	2.76e-05	E
ENSGACG00000013335	groupXII-830	groupXII	18288072	18288268	2.02	2.76e-05	E
ENSGACG00000013357	groupXI-982	groupXI	12954922	12955118	2.4	1.56e-05	C
ENSGACG00000013359	groupXI-982	groupXI	12954922	12955118	2.4	1.56e-05	C
ENSGACG00000013382	groupXIII-371	groupXIII	16320561	16320757	2.23	4.22e-09	C
ENSGACG00000006485	groupXX-1781	groupXX	6435168	6435364	2.55	4.69e-05	C
ENSGACG00000006485	groupXX-1751	groupXX	6477180	6477376	3.33	1.84e-06	E
ENSGACG00000013432	scaffold_61-8	scaffold_61	574227	574423	2.83	5.73e-10	E
ENSGACG00000006735	groupXV-1113	groupXV	3126592	3126788	2.4	8.21e-05	C
ENSGACG00000013477	groupXIII-1958	groupXIII	16450180	16450376	3.15	5.69e-05	C
ENSGACG00000013518	groupIII-696	groupIII	1562152	1562348	2.47	2.26e-07	E
ENSGACG00000013707	groupI-832	groupI	19935102	19935298	2.12	1.19e-05	C
ENSGACG00000013707	groupI-1090	groupI	19931188	19931384	2.12	2.47e-05	E
ENSGACG00000013709	groupI-832	groupI	19935102	19935298	2.12	1.19e-05	C
ENSGACG00000013753	groupVIII-539	groupVIII	17824647	17824843	2.03	5.32e-05	C
ENSGACG00000013764	groupVIII-539	groupVIII	17824647	17824843	2.03	5.32e-05	C
ENSGACG00000013818	groupXI-1611	groupXI	13519248	13519444	2.4	8.21e-05	C
ENSGACG00000013819	groupXIII-2366	groupXIII	17374397	17374593	3	8.93e-05	E
ENSGACG00000013823	groupXIII-2366	groupXIII	17374397	17374593	3	8.93e-05	E
ENSGACG00000012490	groupXVIII-1037	groupXVIII	14175662	14175858	3.07	3.73e-06	C
ENSGACG00000012490	groupXVIII-1000	groupXVIII	14153416	14153612	2.54	5.08e-05	E
ENSGACG00000013958	groupXX-2022	groupXX	17859639	17859835	2.83	3.34e-05	C
ENSGACG00000013976	groupI-834	groupI	20675841	20676037	2.28	1.56e-06	C
ENSGACG00000013980	groupI-834	groupI	20675841	20676037	2.28	1.56e-06	C
ENSGACG00000013992	groupXIII-488	groupXIII	17661616	17661812	2.15	7.36e-07	C
ENSGACG00000014003	groupXIII-488	groupXIII	17661616	17661812	2.15	7.36e-07	C
ENSGACG00000014017	groupIII-1575	groupIII	2704685	2704881	3.18	6.22e-06	E
ENSGACG00000014058	groupXIII-1762	groupXIII	17768612	17768808	4.87	1.35e-09	E
ENSGACG00000015988	groupIX-590	groupIX	763434	763630	2.19	1.1e-06	C
ENSGACG00000014071	groupVIII-1719	groupVIII	18319791	18319987	3.36	8.03e-06	E
ENSGACG00000014083	groupXX-1044	groupXX	18169172	18169368	2.28	8.06e-05	E
ENSGACG00000014132	groupXX-979	groupXX	18511399	18511595	2.17	4e-05	C
ENSGACG00000014175	groupXI-867	groupXI	14512938	14513134	2.15	2.67e-05	C
ENSGACG00000014214	groupXX-1230	groupXX	19187843	19188039	2.14	9.03e-05	C
ENSGACG00000014256	groupI-808	groupI	21506975	21507171	2.1	5.75e-05	C
ENSGACG00000014318	groupXIII-440	groupXIII	18825448	18825644	2.06	1e-06	C
ENSGACG00000014351	groupXI-843	groupXI	14922895	14923091	2.02	2.76e-05	E
ENSGACG00000014358	groupI-3144	groupI	21907276	21907472	3.4	6.9e-05	C
ENSGACG00000014367	groupI-3144	groupI	21907276	21907472	3.4	6.9e-05	C
ENSGACG00000014436	groupI-2087	groupI	22081966	22082162	3.64	1.07e-07	C
ENSGACG00000014437	groupI-2087	groupI	22081966	22082162	3.64	1.07e-07	C
ENSGACG00000014471	groupXIII-2158	groupXIII	19017422	19017618	3.71	5.93e-07	E
ENSGACG00000014546	groupI-1203	groupI	22213143	22213339	2.52	1.19e-06	C
ENSGACG00000014564	groupI-1203	groupI	22213143	22213339	2.52	1.19e-06	C
ENSGACG00000014571	groupXIII-1112	groupXIII	19315395	19315591	3.46	7.93e-09	C
ENSGACG00000014591	groupXIII-1112	groupXIII	19315395	19315591	3.46	7.93e-09	C
ENSGACG00000014627	groupI-2852	groupI	22405278	22405474	3.03	2.02e-05	E
ENSGACG00000014657	groupII-1913	groupII	4285116	4285312	4.15	3.45e-07	C
ENSGACG00000014659	groupII-1913	groupII	4285116	4285312	4.15	3.45e-07	C
ENSGACG00000014771	groupXIII-1016	groupXIII	19991409	19991605	2.35	2.1e-05	E
ENSGACG00000005061	groupXVI-1756	groupXVI	10323391	10323587	3.59	1.99e-05	C
ENSGACG00000014775	groupXIII-1016	groupXIII	19991409	19991605	2.35	2.1e-05	E
ENSGACG00000013410	groupXIII-371	groupXIII	16320561	16320757	2.23	4.22e-09	C
ENSGACG00000014934	groupI-700	groupI	23423954	23424150	2.04	6.95e-06	C
ENSGACG00000014941	groupI-700	groupI	23423954	23424150	2.04	6.95e-06	C
ENSGACG00000014962	scaffold_74-22	scaffold_74	321354	321550	2.37	2.19e-06	E
ENSGACG00000014965	scaffold_74-22	scaffold_74	321354	321550	2.37	2.19e-06	E
ENSGACG00000014984	scaffold_74-23	scaffold_74	349359	349555	2.52	8.87e-06	C
ENSGACG00000014987	groupXI-841	groupXI	16478978	16479174	3.22	1.72e-09	C
ENSGACG00000014990	groupXI-841	groupXI	16478978	16479174	3.22	1.72e-09	C
ENSGACG00000015003	groupIII-1056	groupIII	6634135	6634331	2.75	1.69e-06	C
ENSGACG00000007896	groupXV-691	groupXV	5003721	5003917	2.06	1.13e-05	C
ENSGACG00000015182	groupIII-1392	groupIII	7154041	7154237	3.18	1.42e-06	E
ENSGACG00000015229	groupI-1269	groupI	26533481	26533677	2.33	1.33e-05	E
ENSGACG00000013124	groupXVIII-657	groupXVIII	15196031	15196227	2.23	4.9e-06	E
ENSGACG00000015346	groupIII-1909	groupIII	7595718	7595914	2.71	9.4e-05	C
ENSGACG00000015348	groupI-2895	groupI	27102990	27103186	2.54	5.08e-05	E
ENSGACG00000015384	groupII-1204	groupII	8159828	8160024	2.29	2.57e-05	C
ENSGACG00000015397	groupIII-846	groupIII	7911788	7911984	2.09	3.82e-05	C
ENSGACG00000015473	groupIII-1196	groupIII	8230921	8231117	3.51	3.89e-07	C
ENSGACG00000002969	groupXXI-760	groupXXI	7288118	7288314	2.36	3.34e-05	E
ENSGACG00000015501	groupIII-901	groupIII	8287908	8288104	2.31	5.29e-06	E
ENSGACG00000015573	groupII-775	groupII	9149645	9149841	2.03	5.32e-05	C
ENSGACG00000015573	groupII-1595	groupII	9119230	9119426	2.83	9.85e-06	E
ENSGACG00000015593	groupII-859	groupII	9310009	9310205	2.32	8.38e-06	E
ENSGACG00000015595	groupII-859	groupII	9310009	9310205	2.32	8.38e-06	E
ENSGACG00000015608	groupXIV-663	groupXIV	403905	404101	2.35	2.1e-05	E
ENSGACG00000015642	groupI-1001	groupI	27958714	27958910	2.29	2.11e-06	E
ENSGACG00000009165	groupI-2522	groupI	8562957	8563153	3.1	1.45e-05	C
ENSGACG00000018815	groupIV-1135	groupIV	17949441	17949637	2.3	1.17e-05	C
ENSGACG00000015755	groupXIV-551	groupXIV	860369	860565	2.1	5.75e-05	C
ENSGACG00000015778	groupXIV-488	groupXIV	1053783	1053979	2.02	4.4e-05	E
ENSGACG00000015780	groupXIV-488	groupXIV	1053783	1053979	2.02	4.4e-05	E
ENSGACG00000013115	groupI-1684	groupI	16895024	16895220	4.09	2.48e-08	C
ENSGACG00000015811	groupII-234	groupII	11265566	11265762	2.04	2.73e-08	C
ENSGACG00000000374	scaffold_27-735	scaffold_27	643352	643548	3.46	5.18e-06	C
ENSGACG00000015814	groupII-234	groupII	11265566	11265762	2.04	2.73e-08	C
ENSGACG00000003233	groupVI-1582	groupVI	2812680	2812876	3.78	5.42e-06	C
ENSGACG00000015840	groupII-1407	groupII	11525254	11525450	2.55	4.69e-05	C
ENSGACG00000015844	groupXIV-1017	groupXIV	1522489	1522685	2.59	7.86e-05	E
ENSGACG00000015898	groupXIV-961	groupXIV	1943739	1943935	3.18	1.42e-06	E
ENSGACG00000015902	groupXIV-961	groupXIV	1943739	1943935	3.18	1.42e-06	E
ENSGACG00000015930	groupXIV-830	groupXIV	2581876	2582072	2.22	5.99e-05	C
ENSGACG00000015932	groupXIV-830	groupXIV	2581876	2582072	2.22	5.99e-05	C
ENSGACG00000015936	groupII-718	groupII	11956878	11957074	4.37	7.3e-12	E
ENSGACG00000015937	groupII-718	groupII	11956878	11957074	4.37	7.3e-12	E
ENSGACG00000015970	groupII-914	groupII	12139595	12139791	2.06	8.55e-05	E
ENSGACG00000015996	groupIX-590	groupIX	763434	763630	2.19	1.1e-06	C
ENSGACG00000016018	groupXIV-1088	groupXIV	2770764	2770960	4.06	3.66e-08	E
ENSGACG00000016021	groupXIV-1088	groupXIV	2770764	2770960	4.06	3.66e-08	E
ENSGACG00000016068	groupII-782	groupII	13397471	13397667	2.37	2.19e-06	E
ENSGACG00000016070	groupII-782	groupII	13397471	13397667	2.37	2.19e-06	E
ENSGACG00000016078	groupIII-2297	groupIII	9308188	9308384	2.97	4.44e-05	C
ENSGACG00000016149	groupIX-886	groupIX	1709806	1710002	2.36	4.98e-06	C
ENSGACG00000016153	groupIX-886	groupIX	1709806	1710002	2.36	4.98e-06	C
ENSGACG00000015075	groupI-3199	groupI	25159339	25159535	3.36	8.03e-06	E
ENSGACG00000016316	groupIX-1809	groupIX	2448439	2448635	2.59	7.86e-05	E
ENSGACG00000016457	groupII-641	groupII	15375625	15375821	2.19	8.09e-06	C
ENSGACG00000016514	groupXIV-1544	groupXIV	4133418	4133614	3	8.93e-05	E
ENSGACG00000016546	groupIII-849	groupIII	10835700	10835896	3.26	6.51e-09	C
ENSGACG00000016620	groupII-598	groupII	16568466	16568662	2.38	2.32e-07	E
ENSGACG00000016626	groupII-1330	groupII	16660619	16660815	2.14	9.03e-05	C
ENSGACG00000016641	groupIV-2318	groupIV	2704911	2705107	3.24	4.53e-06	C
ENSGACG00000016642	groupIV-2318	groupIV	2704911	2705107	3.24	4.53e-06	C
ENSGACG00000016646	groupIII-1534	groupIII	11163080	11163276	3.64	1.07e-07	C
ENSGACG00000016650	groupIII-1534	groupIII	11163080	11163276	3.64	1.07e-07	C
ENSGACG00000016674	groupIII-2123	groupIII	11291172	11291368	2.97	4.44e-05	C
ENSGACG00000016675	groupIII-2123	groupIII	11291172	11291368	2.97	4.44e-05	C
ENSGACG00000016700	groupII-1815	groupII	17573040	17573236	4.45	3.14e-08	E
ENSGACG00000016774	groupIX-1975	groupIX	5221874	5222070	2.71	2.84e-05	E
ENSGACG00000016775	groupIX-1975	groupIX	5221874	5222070	2.71	2.84e-05	E
ENSGACG00000016810	groupIV-2328	groupIV	4153370	4153566	3.62	1.46e-06	C
ENSGACG00000016824	groupIV-1682	groupIV	4439663	4439859	2.57	1.26e-05	C
ENSGACG00000005719	groupXII-1904	groupXII	6883799	6883995	2.83	3.34e-05	C
ENSGACG00000016829	groupIV-1682	groupIV	4439663	4439859	2.57	1.26e-05	C
ENSGACG00000016865	groupIII-911	groupIII	12183749	12183945	2.42	8.52e-06	E
ENSGACG00000016908	groupXIV-583	groupXIV	6383955	6384151	2.49	4.32e-06	C
ENSGACG00000016910	groupXIV-583	groupXIV	6383955	6384151	2.49	4.32e-06	C
ENSGACG00000016936	groupII-665	groupII	19047653	19047849	2.02	3.54e-05	C
ENSGACG00000017033	groupIX-1199	groupIX	6005154	6005350	2.57	1.26e-05	C
ENSGACG00000017035	groupIX-1199	groupIX	6005154	6005350	2.57	1.26e-05	C
ENSGACG00000017039	groupIX-1573	groupIX	6020100	6020296	2.83	9.85e-06	E
ENSGACG00000017124	groupIX-741	groupIX	6073132	6073328	2.65	1.25e-08	E
ENSGACG00000017193	groupIX-1274	groupIX	6547454	6547650	2.57	1.26e-05	C
ENSGACG00000020869	groupVII-3238	groupVII	27115128	27115324	3.59	1.99e-05	C
ENSGACG00000017225	groupIX-619	groupIX	6867399	6867595	2.08	2.54e-05	C
ENSGACG00000017255	groupIX-2179	groupIX	7285566	7285762	3.33	1.84e-06	E
ENSGACG00000017287	groupIII-2356	groupIII	13456104	13456300	4.15	3.45e-07	C
ENSGACG00000017389	groupXIV-365	groupXIV	7677872	7678068	2.01	1.04e-05	C
ENSGACG00000017392	groupXIV-365	groupXIV	7677872	7678068	2.01	1.04e-05	C
ENSGACG00000017528	groupXIV-899	groupXIV	8078400	8078596	2.83	2.25e-06	C
ENSGACG00000017533	groupXIV-899	groupXIV	8078400	8078596	2.83	2.25e-06	C
ENSGACG00000017543	groupXIV-1454	groupXIV	8179693	8179889	2.83	3.34e-05	C
ENSGACG00000017543	groupXIV-1744	groupXIV	8173477	8173673	3.21	6.9e-05	C
ENSGACG00000017566	groupXIV-1454	groupXIV	8179693	8179889	2.83	3.34e-05	C
ENSGACG00000017739	groupXIV-1018	groupXIV	9141248	9141444	4.4	1.34e-09	C
ENSGACG00000017793	groupXIV-718	groupXIV	9400043	9400239	2.45	1.34e-05	E
ENSGACG00000010292	groupXX-2187	groupXX	11809924	11810120	3.71	5.93e-07	E
ENSGACG00000017881	groupIV-3259	groupIV	9553007	9553203	3.15	5.69e-05	C
ENSGACG00000017926	groupIII-427	groupIII	16364241	16364437	2.17	7.41e-07	C
ENSGACG00000017932	groupIX-2189	groupIX	8950889	8951085	4.72	2.48e-07	C
ENSGACG00000017963	groupIV-2998	groupIV	10619733	10619929	2.78	4.24e-05	E
ENSGACG00000017966	groupIV-2998	groupIV	10619733	10619929	2.78	4.24e-05	E
ENSGACG00000018016	groupIV-2293	groupIV	10958869	10959065	3.18	6.22e-06	E
ENSGACG00000018023	groupIV-2293	groupIV	10958869	10959065	3.18	6.22e-06	E
ENSGACG00000018059	groupXIV-469	groupXIV	10798051	10798247	2.12	3.79e-06	E
ENSGACG00000018065	groupIX-563	groupIX	9818777	9818973	2.41	7.83e-08	C
ENSGACG00000018066	groupIX-563	groupIX	9818777	9818973	2.41	7.83e-08	C
ENSGACG00000018081	groupIV-1707	groupIV	11324000	11324196	2.22	5.99e-05	C
ENSGACG00000018083	groupIV-1165	groupIV	11363203	11363399	2.9	4.93e-09	E
ENSGACG00000017128	groupIV-1907	groupIV	5684787	5684983	2.25	8.94e-05	C
ENSGACG00000018141	groupIV-1108	groupIV	11704753	11704949	2.24	1.24e-05	E
ENSGACG00000018189	groupXIV-1040	groupXIV	12048861	12049057	2.57	1.26e-05	C
ENSGACG00000018189	groupXIV-948	groupXIV	12054286	12054482	2.36	3.34e-05	E
ENSGACG00000018434	groupIX-1773	groupIX	12207231	12207427	3.07	3.73e-06	C
ENSGACG00000006572	groupXX-1471	groupXX	6753251	6753447	3.18	6.22e-06	E
ENSGACG00000018490	groupIV-3038	groupIV	14593580	14593776	2.59	7.86e-05	E
ENSGACG00000018519	groupIX-1669	groupIX	12821554	12821750	2.83	2.25e-06	C
ENSGACG00000011803	groupXX-1514	groupXX	12801380	12801576	2.5	3.27e-05	E
ENSGACG00000018583	groupIX-487	groupIX	13514885	13515081	3.64	2.08e-15	E
ENSGACG00000005082	groupX-1314	groupX	7716134	7716330	4.66	6.65e-09	E
ENSGACG00000018678	groupIV-1525	groupIV	16191683	16191879	2.47	6.21e-06	C
ENSGACG00000018765	groupIV-3071	groupIV	17655207	17655403	4.34	8.11e-08	C
ENSGACG00000018773	groupIX-2450	groupIX	14417048	14417244	3.15	5.69e-05	C
ENSGACG00000018783	groupIX-627	groupIX	14478044	14478240	2.3	1.17e-05	C
ENSGACG00000018787	groupIX-627	groupIX	14478044	14478240	2.3	1.17e-05	C
ENSGACG00000018814	groupIV-1135	groupIV	17949441	17949637	2.3	1.17e-05	C
ENSGACG00000018826	groupIV-2081	groupIV	18058642	18058838	2.94	2.94e-06	C
ENSGACG00000018923	groupIV-1730	groupIV	19322129	19322325	3.91	7.31e-09	C
ENSGACG00000007218	groupXIII-721	groupXIII	6439916	6440112	2.03	5.32e-05	C
ENSGACG00000010317	groupXX-2187	groupXX	11809924	11810120	3.71	5.93e-07	E
ENSGACG00000018996	groupIV-2249	groupIV	20044780	20044976	2.4	8.21e-05	C
ENSGACG00000018997	groupIV-2249	groupIV	20044780	20044976	2.4	8.21e-05	C
ENSGACG00000019001	groupIV-1441	groupIV	20197437	20197633	2.06	8.55e-05	E
ENSGACG00000019005	groupIV-1441	groupIV	20197437	20197633	2.06	8.55e-05	E
ENSGACG00000019055	groupVII-638	groupVII	2464617	2464813	2.01	1.04e-05	C
ENSGACG00000019057	groupVII-638	groupVII	2464617	2464813	2.01	1.04e-05	C
ENSGACG00000019097	groupIX-901	groupIX	15400447	15400643	2.5	3.35e-06	E
ENSGACG00000019148	groupIV-2604	groupIV	22020488	22020684	2.62	6.68e-05	C
ENSGACG00000019150	groupIV-2604	groupIV	22020488	22020684	2.62	6.68e-05	C
ENSGACG00000019152	groupVII-1222	groupVII	2888320	2888516	2.99	5.23e-08	C
ENSGACG00000019161	groupVII-1222	groupVII	2888320	2888516	2.99	5.23e-08	C
ENSGACG00000019162	groupIX-241	groupIX	15594369	15594565	2.46	2.37e-13	E
ENSGACG00000019164	groupIX-241	groupIX	15594369	15594565	2.46	2.37e-13	E
ENSGACG00000019204	groupIV-1307	groupIV	22502515	22502711	2.91	1.26e-07	E
ENSGACG00000019275	groupVII-2337	groupVII	3132440	3132636	3.46	5.18e-06	C
ENSGACG00000019310	groupIX-470	groupIX	16431213	16431409	2.49	3.42e-10	C
ENSGACG00000019310	groupIX-2476	groupIX	16437785	16437981	4.15	3.45e-07	C
ENSGACG00000019311	groupIV-3759	groupIV	23865357	23865553	5.03	6.7e-07	C
ENSGACG00000019383	groupIV-3115	groupIV	24642337	24642533	3.03	2.02e-05	E
ENSGACG00000019386	groupIV-3115	groupIV	24642337	24642533	3.03	2.02e-05	E
ENSGACG00000019394	groupIX-1578	groupIX	17082149	17082345	2.55	4.69e-05	C
ENSGACG00000019407	groupIX-1006	groupIX	17327123	17327319	2.49	4.32e-06	C
ENSGACG00000019442	groupIX-2084	groupIX	17460200	17460396	3.3	1.76e-05	C
ENSGACG00000019462	groupIX-1248	groupIX	17680018	17680214	3.07	2.44e-07	E
ENSGACG00000019476	groupIX-2290	groupIX	17784538	17784734	3.18	2.75e-05	E
ENSGACG00000019528	groupVII-1931	groupVII	5945008	5945204	2.14	9.03e-05	C
ENSGACG00000019531	groupIX-634	groupIX	18042526	18042722	2.46	1.61e-07	C
ENSGACG00000016932	groupII-1859	groupII	19021947	19022143	3.62	1.46e-06	C
ENSGACG00000019644	groupIV-2379	groupIV	27927240	27927436	2.41	8.36e-05	E
ENSGACG00000019672	groupVII-898	groupVII	7004400	7004596	2.07	3.33e-05	E
ENSGACG00000019677	groupVII-898	groupVII	7004400	7004596	2.07	3.33e-05	E
ENSGACG00000019677	groupVII-2469	groupVII	7011233	7011429	3.78	3.67e-08	E
ENSGACG00000017110	groupII-991	groupII	20440166	20440362	2.49	3.27e-05	C
ENSGACG00000019707	groupIX-1591	groupIX	18856196	18856392	2.83	8.65e-06	C
ENSGACG00000019713	groupIX-1429	groupIX	18873927	18874123	2.19	4.55e-05	E
ENSGACG00000014928	scaffold_74-36	scaffold_74	217696	217892	2.28	8.06e-05	E
ENSGACG00000019783	groupIV-3135	groupIV	29962523	29962719	4.48	1.13e-06	C
ENSGACG00000019785	groupIV-3135	groupIV	29962523	29962719	4.48	1.13e-06	C
ENSGACG00000019818	groupIX-1256	groupIX	19637156	19637352	2.2	4.02e-05	C
ENSGACG00000019820	groupIV-1317	groupIV	30593972	30594168	2.83	1.45e-08	E
ENSGACG00000019843	groupIV-1021	groupIV	30770666	30770862	2.65	4.76e-07	E
ENSGACG00000019843	groupIV-2617	groupIV	30775749	30775945	2.41	8.36e-05	E
ENSGACG00000019878	groupIX-671	groupIX	19889436	19889632	2.04	8.02e-05	C
ENSGACG00000019947	groupVII-776	groupVII	8969631	8969827	2.62	9.31e-09	C
ENSGACG00000020010	groupIX-1545	groupIX	20176786	20176982	2.41	8.36e-05	E
ENSGACG00000020011	groupIX-1545	groupIX	20176786	20176982	2.41	8.36e-05	E
ENSGACG00000020175	groupVII-1479	groupVII	12774259	12774455	2.04	8.02e-05	C
ENSGACG00000020188	groupVII-1012	groupVII	13122378	13122574	2.03	1.08e-05	E
ENSGACG00000020216	groupVII-1408	groupVII	14215959	14216155	2.18	6.01e-05	C
ENSGACG00000020217	groupVII-1408	groupVII	14215959	14216155	2.18	6.01e-05	C
ENSGACG00000020218	groupVII-1408	groupVII	14215959	14216155	2.18	6.01e-05	C
ENSGACG00000020239	groupVII-907	groupVII	14791079	14791275	2.02	4.4e-05	E
ENSGACG00000020259	groupVII-1048	groupVII	15002798	15002994	2.24	7.79e-06	E
ENSGACG00000020274	groupVII-1420	groupVII	15394526	15394722	3.27	5.31e-09	E
ENSGACG00000008224	groupI-927	groupI	6908548	6908744	2.34	8.84e-07	E
ENSGACG00000020361	groupVII-2443	groupVII	17456850	17457046	2.55	4.69e-05	C
ENSGACG00000020362	groupVII-2443	groupVII	17456850	17457046	2.55	4.69e-05	C
ENSGACG00000020385	groupVII-3470	groupVII	17813402	17813598	4.25	4.89e-06	C
ENSGACG00000020495	groupVII-3065	groupVII	19262262	19262458	3.6	9.64e-06	E
ENSGACG00000020497	groupVII-3065	groupVII	19262262	19262458	3.6	9.64e-06	E
ENSGACG00000020571	groupVII-1879	groupVII	20391601	20391797	2.75	1.69e-06	C
ENSGACG00000020578	groupVII-3501	groupVII	20582757	20582953	3.21	6.9e-05	C
ENSGACG00000020580	groupVII-3501	groupVII	20582757	20582953	3.21	6.9e-05	C
ENSGACG00000020599	groupVII-1198	groupVII	20939383	20939579	2.09	3.82e-05	C
ENSGACG00000020600	groupVII-1198	groupVII	20939383	20939579	2.09	3.82e-05	C
ENSGACG00000020611	groupVII-1105	groupVII	21405308	21405504	2.12	6.33e-05	E
ENSGACG00000020612	groupVII-1105	groupVII	21405308	21405504	2.12	6.33e-05	E
ENSGACG00000020656	groupVII-668	groupVII	21967569	21967765	2.47	2.59e-09	E
ENSGACG00000004679	groupXVIII-1229	groupXVIII	1275698	1275894	5.3	3.96e-09	E
ENSGACG00000020711	groupVII-2142	groupVII	22749694	22749890	3.78	2.85e-08	C
ENSGACG00000020712	groupVII-2142	groupVII	22749694	22749890	3.78	2.85e-08	C
ENSGACG00000020744	groupVII-1031	groupVII	23847916	23848112	2.2	1.21e-05	C
ENSGACG00000020771	groupVII-717	groupVII	24326324	24326520	2.14	2.44e-06	C
ENSGACG00000020773	groupVII-3564	groupVII	24535340	24535536	3.21	6.9e-05	C
ENSGACG00000020868	groupVII-3238	groupVII	27115128	27115324	3.59	1.99e-05	C
ENSGACG00000005517	groupXVIII-1557	groupXVIII	2578836	2579032	3.36	8.03e-06	E

## Sheet: Dap120
ensembl_gene_id	peak	chr	start	end	fc	p	bgexp
ENSGACG00000000060	scaffold_99-8	scaffold_99	38964	39174	2.27	2.11e-07	C
ENSGACG00000000063	scaffold_99-20	scaffold_99	90333	90549	2.89	5.19e-09	E
ENSGACG00000000116	scaffold_58-11	scaffold_58	798161	798371	2.05	1.5e-06	C
ENSGACG00000000151	scaffold_58-16	scaffold_58	1103354	1103564	2.55	8.87e-06	C
ENSGACG00000000159	scaffold_216-8	scaffold_216	31047	31257	3.83	2.1e-09	C
ENSGACG00000000232	scaffold_238-3	scaffold_238	43231	43447	2.68	2.39e-06	E
ENSGACG00000000271	scaffold_69-16	scaffold_69	186843	187059	2.21	3.68e-05	E
ENSGACG00000000310	scaffold_69-24	scaffold_69	697262	697472	4.03	3.45e-07	C
ENSGACG00000000316	scaffold_27-300	scaffold_27	104757	104967	2.35	3.79e-05	C
ENSGACG00000000319	scaffold_27-300	scaffold_27	104757	104967	2.35	3.79e-05	C
ENSGACG00000000357	scaffold_27-548	scaffold_27	304871	305081	3.73	7.63e-05	C
ENSGACG00000000360	scaffold_131-16	scaffold_131	148861	149071	4.11	4.89e-06	C
ENSGACG00000000376	scaffold_27-210	scaffold_27	656468	656678	2.09	2.54e-05	C
ENSGACG00000000388	scaffold_27-194	scaffold_27	717264	717474	2.12	2.37e-06	C
ENSGACG00000000472	scaffold_27-365	scaffold_27	985410	985620	3.84	2.85e-08	C
ENSGACG00000000472	scaffold_27-555	scaffold_27	984484	984694	4.48	1.13e-06	C
ENSGACG00000000588	scaffold_67-21	scaffold_67	536230	536446	2.92	5.71e-06	E
ENSGACG00000000601	scaffold_27-151	scaffold_27	1265837	1266047	2.17	3.64e-06	C
ENSGACG00000000604	scaffold_27-151	scaffold_27	1265837	1266047	2.17	3.64e-06	C
ENSGACG00000000623	scaffold_90-44	scaffold_90	209637	209853	2.43	2.08e-05	E
ENSGACG00000000632	scaffold_27-201	scaffold_27	1486858	1487068	2.16	8.09e-06	C
ENSGACG00000000695	scaffold_90-32	scaffold_90	437587	437797	2.15	6.01e-05	C
ENSGACG00000000703	scaffold_27-297	scaffold_27	1878157	1878373	2.31	2.86e-05	E
ENSGACG00000000728	scaffold_47-65	scaffold_47	173900	174110	2.24	5.99e-05	C
ENSGACG00000000729	scaffold_27-123	scaffold_27	2002828	2003038	2.38	3.54e-09	C
ENSGACG00000000730	scaffold_47-65	scaffold_47	173900	174110	2.24	5.99e-05	C
ENSGACG00000000731	scaffold_47-48	scaffold_47	215634	215844	4.06	9.85e-12	C
ENSGACG00000000733	scaffold_47-48	scaffold_47	215634	215844	4.06	9.85e-12	C
ENSGACG00000000753	scaffold_47-104	scaffold_47	300680	300890	2.88	4.44e-05	C
ENSGACG00000000816	scaffold_141-5	scaffold_141	172151	172367	2.12	1.93e-06	E
ENSGACG00000000818	scaffold_141-5	scaffold_141	172151	172367	2.12	1.93e-06	E
ENSGACG00000000830	scaffold_27-266	scaffold_27	2280473	2280683	3.58	6.06e-10	C
ENSGACG00000000831	scaffold_27-266	scaffold_27	2280473	2280683	3.58	6.06e-10	C
ENSGACG00000000839	scaffold_27-153	scaffold_27	2470952	2471162	2.7	3.45e-09	C
ENSGACG00000000839	scaffold_27-322	scaffold_27	2444332	2444548	2.49	3.64e-05	E
ENSGACG00000000845	scaffold_27-153	scaffold_27	2470952	2471162	2.7	3.45e-09	C
ENSGACG00000000867	scaffold_47-38	scaffold_47	1118697	1118907	2.12	2.37e-06	C
ENSGACG00000000872	scaffold_27-129	scaffold_27	2520765	2520975	2.02	3.1e-06	C
ENSGACG00000000898	scaffold_27-300	scaffold_27	2609855	2610071	2.23	1.79e-05	E
ENSGACG00000001022	scaffold_27-144	scaffold_27	2949559	2949775	2.39	4.72e-08	E
ENSGACG00000001025	scaffold_27-144	scaffold_27	2949559	2949775	2.39	4.72e-08	E
ENSGACG00000001123	scaffold_129-20	scaffold_129	49872	50082	3.73	2.85e-08	C
ENSGACG00000001123	scaffold_129-21	scaffold_129	52022	52232	2.76	6.42e-06	C
ENSGACG00000001123	scaffold_129-26	scaffold_129	51277	51487	5.97	2.16e-08	C
ENSGACG00000001125	scaffold_129-21	scaffold_129	52022	52232	2.76	6.42e-06	C
ENSGACG00000001125	scaffold_129-26	scaffold_129	51277	51487	5.97	2.16e-08	C
ENSGACG00000001170	scaffold_146-7	scaffold_146	195902	196112	3.73	5.42e-06	C
ENSGACG00000001282	scaffold_249-3	scaffold_249	13025	13235	4.48	1.34e-09	C
ENSGACG00000001294	scaffold_27-320	scaffold_27	3608682	3608892	7.28	6.88e-16	C
ENSGACG00000001317	scaffold_27-309	scaffold_27	3829242	3829452	2.38	8.21e-05	C
ENSGACG00000001317	scaffold_27-603	scaffold_27	3822991	3823201	4.11	4.89e-06	C
ENSGACG00000001355	scaffold_239-9	scaffold_239	19561	19771	2.8	3.34e-05	C
ENSGACG00000001405	scaffold_219-9	scaffold_219	46930	47140	2.89	2.85e-09	C
ENSGACG00000001405	scaffold_219-19	scaffold_219	46370	46580	3.09	1.45e-05	C
ENSGACG00000001405	scaffold_219-20	scaffold_219	45821	46031	4.73	3.4e-06	C
ENSGACG00000001413	scaffold_219-12	scaffold_219	75797	76007	2.14	9.03e-05	C
ENSGACG00000001413	scaffold_219-16	scaffold_219	76479	76689	2.65	6.68e-05	C
ENSGACG00000001422	groupXVI-283	groupXVI	45531	45741	2.24	5.34e-06	C
ENSGACG00000001424	groupXVI-283	groupXVI	45531	45741	2.24	5.34e-06	C
ENSGACG00000001473	scaffold_27-15	scaffold_27	4198874	4199084	2.15	5.44e-14	C
ENSGACG00000001473	scaffold_27-37	scaffold_27	4200645	4200855	2.08	3.84e-11	C
ENSGACG00000001473	scaffold_27-310	scaffold_27	4203352	4203562	2.14	9.03e-05	C
ENSGACG00000001473	scaffold_27-544	scaffold_27	4211593	4211803	2.88	4.44e-05	C
ENSGACG00000001475	scaffold_27-544	scaffold_27	4211593	4211803	2.88	4.44e-05	C
ENSGACG00000001487	scaffold_269-4	scaffold_269	30928	31138	2.95	1.43e-11	C
ENSGACG00000001502	scaffold_269-4	scaffold_269	30928	31138	2.95	1.43e-11	C
ENSGACG00000001590	groupXVI-650	groupXVI	1841202	1841418	2.43	2.08e-05	E
ENSGACG00000001634	scaffold_120-19	scaffold_120	245465	245675	5.72	2.16e-08	C
ENSGACG00000001663	scaffold_27-477	scaffold_27	4851647	4851857	4.33	8.11e-08	C
ENSGACG00000001663	scaffold_27-641	scaffold_27	4850198	4850408	4.11	4.89e-06	C
ENSGACG00000001665	scaffold_27-477	scaffold_27	4851647	4851857	4.33	8.11e-08	C
ENSGACG00000001665	scaffold_27-641	scaffold_27	4850198	4850408	4.11	4.89e-06	C
ENSGACG00000001676	groupXVI-418	groupXVI	2294352	2294562	2.07	5.75e-05	C
ENSGACG00000001680	groupXVI-418	groupXVI	2294352	2294562	2.07	5.75e-05	C
ENSGACG00000001689	scaffold_213-10	scaffold_213	48341	48551	2.71	4.68e-06	C
ENSGACG00000001697	scaffold_213-10	scaffold_213	48341	48551	2.71	4.68e-06	C
ENSGACG00000001816	groupXVI-879	groupXVI	2497621	2497831	2.82	8.65e-06	C
ENSGACG00000001880	scaffold_132-13	scaffold_132	169784	169994	4.23	5.89e-09	C
ENSGACG00000001883	groupXVI-827	groupXVI	2628815	2629031	4.19	5.38e-09	E
ENSGACG00000001892	groupXVI-269	groupXVI	2778583	2778793	5	1.85e-19	C
ENSGACG00000001893	groupXVI-269	groupXVI	2778583	2778793	5	1.85e-19	C
ENSGACG00000001893	groupXVI-495	groupXVI	2786054	2786264	3.98	3.97e-11	C
ENSGACG00000001894	scaffold_132-13	scaffold_132	169784	169994	4.23	5.89e-09	C
ENSGACG00000001898	scaffold_128-17	scaffold_128	26843	27053	2.57	6.68e-05	C
ENSGACG00000001898	scaffold_128-23	scaffold_128	28241	28451	3.88	1.4e-06	C
ENSGACG00000001915	scaffold_128-24	scaffold_128	78593	78803	3.73	7.63e-05	C
ENSGACG00000001925	groupXXI-899	groupXXI	2036708	2036918	3.58	1.99e-05	C
ENSGACG00000001969	groupXXI-420	groupXXI	2093112	2093322	3.36	7.37e-09	C
ENSGACG00000001993	groupX-384	groupX	1368300	1368516	2.07	4.15e-06	E
ENSGACG00000002003	groupX-556	groupX	1444716	1444926	2.99	2e-07	C
ENSGACG00000002010	groupX-556	groupX	1444716	1444926	2.99	2e-07	C
ENSGACG00000002025	groupXVI-406	groupXVI	3442930	3443140	2.09	2.54e-05	C
ENSGACG00000002029	groupX-931	groupX	1471641	1471857	4.02	2.28e-08	E
ENSGACG00000002071	groupXVI-603	groupXVI	3595693	3595909	2.3	7.66e-06	E
ENSGACG00000002075	groupXVI-603	groupXVI	3595693	3595909	2.3	7.66e-06	E
ENSGACG00000002091	groupXVI-981	groupXVI	3652958	3653174	3.04	1.84e-06	E
ENSGACG00000002094	groupXXI-717	groupXXI	2690572	2690782	3.48	5.18e-06	C
ENSGACG00000002118	groupX-355	groupX	1548095	1548311	2.68	2.99e-09	E
ENSGACG00000002159	groupV-559	groupV	250924	251134	3.23	9.34e-08	C
ENSGACG00000002192	groupXXI-99	groupXXI	3090333	3090543	2.5	1.73e-09	C
ENSGACG00000002198	groupXXI-99	groupXXI	3090333	3090543	2.5	1.73e-09	C
ENSGACG00000002244	groupXXI-210	groupXXI	3766488	3766704	2.37	1.53e-06	E
ENSGACG00000002265	groupXIX-670	groupXIX	731194	731410	2.26	3.27e-05	E
ENSGACG00000002270	groupX-1828	groupX	1630045	1630255	3.55	7.63e-05	C
ENSGACG00000002271	groupX-1828	groupX	1630045	1630255	3.55	7.63e-05	C
ENSGACG00000002294	groupXIX-1092	groupXIX	849816	850026	4.85	5.16e-08	C
ENSGACG00000002297	groupVI-1951	groupVI	361571	361781	3.55	7.63e-05	C
ENSGACG00000002304	groupV-363	groupV	662160	662376	2.49	5.12e-07	E
ENSGACG00000002353	groupXVI-150	groupXVI	5582241	5582451	2.12	1.01e-07	C
ENSGACG00000002357	groupX-730	groupX	1963564	1963774	2.71	4.68e-06	C
ENSGACG00000002357	groupX-1437	groupX	1962422	1962632	6.47	5.59e-10	C
ENSGACG00000002357	groupX-1331	groupX	1965335	1965545	17.17	1.09e-15	C
ENSGACG00000002367	groupXVI-150	groupXVI	5582241	5582451	2.12	1.01e-07	C
ENSGACG00000002374	groupXXI-994	groupXXI	4348216	4348426	4.48	1.13e-06	C
ENSGACG00000002375	groupV-968	groupV	832076	832286	19.41	3.18e-18	C
ENSGACG00000002381	groupXIX-289	groupXIX	989579	989795	2.61	3.29e-07	E
ENSGACG00000002398	groupXIX-289	groupXIX	989579	989795	2.61	3.29e-07	E
ENSGACG00000002408	groupVI-917	groupVI	590706	590916	3.17	1.17e-06	C
ENSGACG00000002412	groupVI-917	groupVI	590706	590916	3.17	1.17e-06	C
ENSGACG00000002416	groupXXI-58	groupXXI	4713289	4713499	2.52	5.3e-12	C
ENSGACG00000002425	groupXXI-339	groupXXI	5127680	5127890	5.47	9.15e-14	C
ENSGACG00000002558	groupXII-509	groupXII	73995	74205	2.59	3.43e-08	C
ENSGACG00000002578	groupV-611	groupV	1250667	1250877	3.73	2.85e-08	C
ENSGACG00000002584	groupVI-1091	groupVI	892020	892230	8.96	5.61e-11	C
ENSGACG00000002596	groupV-210	groupV	1279307	1279517	2.3	1.96e-08	C
ENSGACG00000002597	groupV-210	groupV	1279307	1279517	2.3	1.96e-08	C
ENSGACG00000002622	groupXII-450	groupXII	270157	270367	2.04	8.02e-05	C
ENSGACG00000002622	groupXII-630	groupXII	268520	268736	2.11	1.31e-05	E
ENSGACG00000002640	groupV-612	groupV	1581578	1581794	2.49	3.64e-05	E
ENSGACG00000002656	groupVI-1647	groupVI	1111314	1111524	8.96	5.61e-11	C
ENSGACG00000002663	groupV-665	groupV	1668351	1668561	4.48	1.34e-09	C
ENSGACG00000002667	groupXIX-262	groupXIX	2231536	2231746	2.63	3.43e-08	C
ENSGACG00000002668	groupV-665	groupV	1668351	1668561	4.48	1.34e-09	C
ENSGACG00000002674	groupX-480	groupX	2672613	2672823	2.06	1.69e-05	C
ENSGACG00000002690	groupXIX-262	groupXIX	2231536	2231746	2.63	3.43e-08	C
ENSGACG00000002690	groupXIX-537	groupXIX	2249907	2250117	2.61	1.77e-05	C
ENSGACG00000002695	groupXII-623	groupXII	551046	551256	2.29	1.17e-05	C
ENSGACG00000002699	groupXII-623	groupXII	551046	551256	2.29	1.17e-05	C
ENSGACG00000002703	groupX-175	groupX	3023042	3023252	5.28	6.28e-27	C
ENSGACG00000002703	groupX-1563	groupX	3039220	3039430	6.22	3.57e-09	C
ENSGACG00000002717	groupXII-597	groupXII	593226	593442	2.07	5.24e-05	E
ENSGACG00000002717	groupXII-1050	groupXII	597840	598056	2.34	5.16e-05	E
ENSGACG00000002730	groupVI-868	groupVI	1345605	1345815	2.38	8.21e-05	C
ENSGACG00000002732	groupVI-868	groupVI	1345605	1345815	2.38	8.21e-05	C
ENSGACG00000002736	groupVI-451	groupVI	1374698	1374908	4.4	1.28e-13	C
ENSGACG00000002743	groupVI-451	groupVI	1374698	1374908	4.4	1.28e-13	C
ENSGACG00000002750	groupXII-597	groupXII	593226	593442	2.07	5.24e-05	E
ENSGACG00000002750	groupXII-1050	groupXII	597840	598056	2.34	5.16e-05	E
ENSGACG00000002760	groupXII-555	groupXII	621170	621380	2.61	1.26e-07	C
ENSGACG00000002813	groupV-876	groupV	1953190	1953400	3.09	1.45e-05	C
ENSGACG00000002813	groupV-1269	groupV	1951968	1952178	5.23	6.7e-07	C
ENSGACG00000002822	groupXXI-332	groupXXI	6935360	6935576	2.07	5.24e-05	E
ENSGACG00000002852	groupXII-467	groupXII	761353	761569	2.34	8.65e-07	E
ENSGACG00000002866	groupXVI-58	groupXVI	7022291	7022501	2.08	5.82e-10	C
ENSGACG00000002869	groupXVI-58	groupXVI	7022291	7022501	2.08	5.82e-10	C
ENSGACG00000002877	groupVI-491	groupVI	2069779	2069995	2.12	2.42e-05	E
ENSGACG00000002885	groupX-326	groupX	3229651	3229861	2.31	2.11e-07	C
ENSGACG00000002886	groupXIX-798	groupXIX	2477651	2477861	4.03	3.45e-07	C
ENSGACG00000002889	groupXVI-778	groupXVI	7109991	7110207	2.41	4.39e-05	E
ENSGACG00000002890	groupV-717	groupV	2088212	2088422	2.76	6.42e-06	C
ENSGACG00000002892	groupV-717	groupV	2088212	2088422	2.76	6.42e-06	C
ENSGACG00000002902	groupXIX-798	groupXIX	2477651	2477861	4.03	3.45e-07	C
ENSGACG00000002905	groupVI-874	groupVI	2174390	2174600	3.17	1.17e-06	C
ENSGACG00000002905	groupVI-1660	groupVI	2173687	2173897	14.93	4.52e-12	C
ENSGACG00000002914	groupX-887	groupX	3288078	3288288	3.31	1.35e-06	C
ENSGACG00000002916	groupX-887	groupX	3288078	3288288	3.31	1.35e-06	C
ENSGACG00000002922	groupXXI-126	groupXXI	7271516	7271726	2.02	9.25e-07	C
ENSGACG00000002926	groupXII-347	groupXII	1057912	1058122	2.87	4.17e-11	C
ENSGACG00000002932	groupXVI-1262	groupXVI	7251744	7251954	2.88	4.44e-05	C
ENSGACG00000002938	groupXII-347	groupXII	1057912	1058122	2.87	4.17e-11	C
ENSGACG00000002995	groupXXI-422	groupXXI	7427396	7427612	2.31	2.86e-05	E
ENSGACG00000002998	groupXXI-102	groupXXI	7451722	7451938	2.05	1.31e-06	E
ENSGACG00000002998	groupXXI-156	groupXXI	7459116	7459332	2.07	1.22e-06	E
ENSGACG00000003000	groupVI-475	groupVI	2414580	2414790	2.47	8.32e-07	C
ENSGACG00000003007	groupVI-475	groupVI	2414580	2414790	2.47	8.32e-07	C
ENSGACG00000003020	groupX-937	groupX	3634728	3634944	3.01	8.85e-07	E
ENSGACG00000003033	groupVI-476	groupVI	2484138	2484348	3.33	4.2e-11	C
ENSGACG00000003033	groupVI-974	groupVI	2478409	2478619	2.8	3.34e-05	C
ENSGACG00000003086	groupV-757	groupV	2255969	2256179	2.57	6.68e-05	C
ENSGACG00000003136	groupXX-768	groupXX	433540	433750	2.74	1.24e-06	C
ENSGACG00000003140	groupX-1448	groupX	3941183	3941393	3.43	1.99e-05	C
ENSGACG00000003143	groupXX-768	groupXX	433540	433750	2.74	1.24e-06	C
ENSGACG00000003167	groupXXI-539	groupXXI	7631473	7631689	2.68	4.87e-05	E
ENSGACG00000003172	groupXXI-539	groupXXI	7631473	7631689	2.68	4.87e-05	E
ENSGACG00000003185	groupXX-1211	groupXX	509353	509563	3.23	1.76e-05	C
ENSGACG00000003212	groupVI-330	groupVI	2792299	2792509	3.07	7.24e-12	C
ENSGACG00000003216	groupVI-330	groupVI	2792299	2792509	3.07	7.24e-12	C
ENSGACG00000003218	groupXVII-82	groupXVII	490591	490801	2.06	3.71e-10	C
ENSGACG00000003230	groupXX-896	groupXX	607914	608130	3.01	8.85e-07	E
ENSGACG00000003231	groupV-194	groupV	2574695	2574905	2.86	6.19e-13	C
ENSGACG00000003234	groupXX-896	groupXX	607914	608130	3.01	8.85e-07	E
ENSGACG00000003256	groupV-194	groupV	2574695	2574905	2.86	6.19e-13	C
ENSGACG00000003268	groupV-382	groupV	2606874	2607084	2.85	2.2e-09	C
ENSGACG00000003289	groupVIII-300	groupVIII	1309807	1310023	2.22	2.64e-06	E
ENSGACG00000003328	groupXIX-800	groupXIX	3294661	3294871	2.71	9.4e-05	C
ENSGACG00000003338	groupXIX-731	groupXIX	3345841	3346057	3.13	7.97e-06	E
ENSGACG00000003367	groupXXI-425	groupXXI	7915013	7915229	2.29	5.96e-05	E
ENSGACG00000003439	groupVI-801	groupVI	3074144	3074354	2.29	2.57e-05	C
ENSGACG00000003443	groupVI-801	groupVI	3074144	3074354	2.29	2.57e-05	C
ENSGACG00000003460	groupXIX-498	groupXIX	3964409	3964619	3.95	7.31e-09	C
ENSGACG00000003475	groupVI-638	groupVI	3402791	3403001	2.86	1.55e-07	C
ENSGACG00000003475	groupVI-1433	groupVI	3409157	3409367	4.85	5.16e-08	C
ENSGACG00000003475	groupVI-1548	groupVI	3406711	3406921	2.88	4.44e-05	C
ENSGACG00000003490	groupXVII-452	groupXVII	676759	676969	5.55	2.76e-16	C
ENSGACG00000003491	groupXIX-882	groupXIX	4360520	4360730	38.82	9.51e-24	C
ENSGACG00000003493	groupV-724	groupV	3701759	3701969	3.41	1.35e-06	C
ENSGACG00000003498	groupV-724	groupV	3701759	3701969	3.41	1.35e-06	C
ENSGACG00000003500	groupXXI-41	groupXXI	8061179	8061389	2.96	5.24e-15	C
ENSGACG00000003502	groupVI-638	groupVI	3402791	3403001	2.86	1.55e-07	C
ENSGACG00000003502	groupVI-1433	groupVI	3409157	3409367	4.85	5.16e-08	C
ENSGACG00000003502	groupVI-1548	groupVI	3406711	3406921	2.88	4.44e-05	C
ENSGACG00000003507	groupXIX-882	groupXIX	4360520	4360730	38.82	9.51e-24	C
ENSGACG00000003515	groupXXI-41	groupXXI	8061179	8061389	2.96	5.24e-15	C
ENSGACG00000003551	groupXVII-1588	groupXVII	819681	819891	3.55	7.63e-05	C
ENSGACG00000003552	groupX-774	groupX	5099456	5099672	2.86	2.92e-07	E
ENSGACG00000003554	groupXIX-759	groupXIX	4469493	4469703	3.55	2.93e-08	C
ENSGACG00000003555	groupXVII-1588	groupXVII	819681	819891	3.55	7.63e-05	C
ENSGACG00000003556	groupVIII-659	groupVIII	1625308	1625518	2.14	9.03e-05	C
ENSGACG00000003562	groupXIX-759	groupXIX	4469493	4469703	3.55	2.93e-08	C
ENSGACG00000003574	groupXIII-850	groupXIII	884010	884226	2.31	2.86e-05	E
ENSGACG00000003576	groupXIII-850	groupXIII	884010	884226	2.31	2.86e-05	E
ENSGACG00000003582	groupXVI-1832	groupXVI	8027081	8027291	8.21	4.8e-10	C
ENSGACG00000003584	groupXVI-1832	groupXVI	8027081	8027291	8.21	4.8e-10	C
ENSGACG00000003604	groupXXI-159	groupXXI	8232107	8232323	2.22	1.94e-07	E
ENSGACG00000003606	groupXXI-159	groupXXI	8232107	8232323	2.22	1.94e-07	E
ENSGACG00000003609	groupXIX-315	groupXIX	4606095	4606305	2.12	2.67e-05	C
ENSGACG00000003622	groupXIII-1239	groupXIII	959295	959505	3.88	1.4e-06	C
ENSGACG00000003623	groupVIII-841	groupVIII	1685982	1686192	3.36	3.55e-07	C
ENSGACG00000003628	groupX-1063	groupX	5151304	5151514	2.65	6.68e-05	C
ENSGACG00000003632	groupX-1063	groupX	5151304	5151514	2.65	6.68e-05	C
ENSGACG00000003645	groupX-1876	groupX	5165069	5165279	3.73	7.63e-05	C
ENSGACG00000003648	groupXVI-320	groupXVI	8252348	8252558	2.53	6.37e-08	C
ENSGACG00000003653	groupXIII-343	groupXIII	998921	999131	3.63	7.61e-14	C
ENSGACG00000003653	groupXIII-911	groupXIII	1002072	1002282	3.98	1.01e-07	C
ENSGACG00000003658	groupXII-404	groupXII	2602236	2602446	2.63	2.53e-09	C
ENSGACG00000003658	groupXII-882	groupXII	2606226	2606436	3.64	7.97e-09	C
ENSGACG00000003658	groupXII-2253	groupXII	2605507	2605717	4.11	4.89e-06	C
ENSGACG00000003658	groupXII-1938	groupXII	2606973	2607183	3.28	6.9e-05	C
ENSGACG00000003682	groupX-1464	groupX	5209814	5210024	3.73	7.63e-05	C
ENSGACG00000003684	groupX-328	groupX	5215059	5215269	2.31	2.11e-07	C
ENSGACG00000003710	groupV-691	groupV	3995681	3995897	2.58	1.38e-05	E
ENSGACG00000003800	groupXII-1336	groupXII	3038033	3038243	2.89	1.14e-05	C
ENSGACG00000003820	groupXVI-367	groupXVI	8689959	8690169	4.48	3.75e-17	C
ENSGACG00000003822	groupV-277	groupV	4469015	4469225	2.79	1.2e-10	C
ENSGACG00000003843	groupVIII-965	groupVIII	2063335	2063545	2.61	1.77e-05	C
ENSGACG00000003847	groupXXI-477	groupXXI	8816198	8816414	2.34	5.16e-05	E
ENSGACG00000003925	groupV-1290	groupV	4556922	4557132	15.68	3e-13	C
ENSGACG00000003937	groupX-824	groupX	5427699	5427915	2.87	6.13e-07	E
ENSGACG00000003938	groupX-775	groupX	5540656	5540872	2.14	8.31e-05	E
ENSGACG00000003954	groupV-343	groupV	4634349	4634559	2.81	1.67e-09	C
ENSGACG00000003961	groupVI-668	groupVI	4102145	4102361	2.21	3.68e-05	E
ENSGACG00000003964	groupVIII-607	groupVIII	2206494	2206710	2.68	5.35e-07	E
ENSGACG00000003978	groupXVI-378	groupXVI	8907078	8907288	2.04	7.52e-06	C
ENSGACG00000003978	groupXVI-1847	groupXVI	8909554	8909764	4.98	3.4e-06	C
ENSGACG00000003992	groupXVI-378	groupXVI	8907078	8907288	2.04	7.52e-06	C
ENSGACG00000003992	groupXVI-470	groupXVI	8921689	8921899	3.57	2.21e-09	C
ENSGACG00000003992	groupXVI-1847	groupXVI	8909554	8909764	4.98	3.4e-06	C
ENSGACG00000003998	groupXVII-491	groupXVII	1479068	1479278	5.12	4.14e-14	C
ENSGACG00000004014	groupXVI-470	groupXVI	8921689	8921899	3.57	2.21e-09	C
ENSGACG00000004032	groupX-1356	groupX	6231285	6231495	3.88	1.4e-06	C
ENSGACG00000004039	groupX-1356	groupX	6231285	6231495	3.88	1.4e-06	C
ENSGACG00000004047	groupV-336	groupV	4717862	4718078	2.1	3.85e-06	E
ENSGACG00000004054	groupXVII-1596	groupXVII	1537228	1537438	8.21	4.8e-10	C
ENSGACG00000004063	groupXIX-1313	groupXIX	5610814	5611024	5.97	2.16e-08	C
ENSGACG00000004080	groupVI-544	groupVI	4405109	4405319	2.56	1.7e-06	C
ENSGACG00000004081	groupV-336	groupV	4717862	4718078	2.1	3.85e-06	E
ENSGACG00000004084	groupX-1011	groupX	6377525	6377735	2.88	4.44e-05	C
ENSGACG00000004118	groupVI-669	groupVI	4441551	4441767	2.39	9.25e-05	E
ENSGACG00000004120	groupXII-80	groupXII	3170766	3170982	2.39	1.83e-12	E
ENSGACG00000004127	groupXII-821	groupXII	3191679	3191889	3.98	3.97e-11	C
ENSGACG00000004127	groupXII-885	groupXII	3188124	3188334	3.95	7.31e-09	C
ENSGACG00000004127	groupXII-1188	groupXII	3197478	3197688	3.48	5.18e-06	C
ENSGACG00000004127	groupXII-1337	groupXII	3195321	3195531	2.89	1.14e-05	C
ENSGACG00000004127	groupXII-80	groupXII	3170766	3170982	2.39	1.83e-12	E
ENSGACG00000004133	groupXII-821	groupXII	3191679	3191889	3.98	3.97e-11	C
ENSGACG00000004133	groupXII-885	groupXII	3188124	3188334	3.95	7.31e-09	C
ENSGACG00000004133	groupXII-1188	groupXII	3197478	3197688	3.48	5.18e-06	C
ENSGACG00000004133	groupXII-1337	groupXII	3195321	3195531	2.89	1.14e-05	C
ENSGACG00000004136	groupXIII-309	groupXIII	1571151	1571361	3.23	1e-11	C
ENSGACG00000004146	groupXIII-309	groupXIII	1571151	1571361	3.23	1e-11	C
ENSGACG00000004165	groupVI-765	groupVI	4807568	4807778	3.07	9.64e-07	C
ENSGACG00000004228	groupXVI-501	groupXVI	9446778	9446994	2.6	3.08e-06	E
ENSGACG00000004251	groupXVIII-867	groupXVIII	610277	610493	3.27	2.39e-06	E
ENSGACG00000004258	groupV-1295	groupV	4989304	4989514	3.73	7.63e-05	C
ENSGACG00000004273	groupVI-2010	groupVI	4919917	4920127	3.55	7.63e-05	C
ENSGACG00000004285	groupVI-2010	groupVI	4919917	4920127	3.55	7.63e-05	C
ENSGACG00000004286	groupXII-741	groupXII	3818005	3818221	2.61	3.29e-07	E
ENSGACG00000004301	groupVIII-664	groupVIII	2449887	2450097	2.85	5.9e-07	C
ENSGACG00000004320	groupVI-127	groupVI	4986523	4986739	2.04	1.86e-08	E
ENSGACG00000004340	groupVI-127	groupVI	4986523	4986739	2.04	1.86e-08	E
ENSGACG00000004342	groupXVII-878	groupXVII	1886964	1887174	3.63	1.07e-07	C
ENSGACG00000004366	groupXVII-878	groupXVII	1886964	1887174	3.63	1.07e-07	C
ENSGACG00000004378	groupXVI-754	groupXVI	9596355	9596565	3.08	3.73e-06	C
ENSGACG00000004410	groupXVI-544	groupXVI	9622802	9623012	6.72	2.4e-13	C
ENSGACG00000004450	groupV-1121	groupV	5467371	5467581	4.11	4.89e-06	C
ENSGACG00000004470	groupXVI-165	groupXVI	9695445	9695655	2.21	6.88e-08	C
ENSGACG00000004550	groupXX-326	groupXX	2455632	2455842	2.01	4.64e-06	C
ENSGACG00000004566	groupVI-465	groupVI	5502280	5502490	3.66	1.26e-11	C
ENSGACG00000004566	groupVI-1689	groupVI	5502952	5503162	3.28	6.9e-05	C
ENSGACG00000004572	groupVI-465	groupVI	5502280	5502490	3.66	1.26e-11	C
ENSGACG00000004572	groupVI-1689	groupVI	5502952	5503162	3.28	6.9e-05	C
ENSGACG00000004575	groupXII-928	groupXII	4106378	4106588	3.55	2.93e-08	C
ENSGACG00000004577	groupXX-326	groupXX	2455632	2455842	2.01	4.64e-06	C
ENSGACG00000004594	groupXII-928	groupXII	4106378	4106588	3.55	2.93e-08	C
ENSGACG00000004597	groupV-1416	groupV	5693915	5694125	3.73	7.63e-05	C
ENSGACG00000004601	groupV-1416	groupV	5693915	5694125	3.73	7.63e-05	C
ENSGACG00000004617	groupV-1416	groupV	5693915	5694125	3.73	7.63e-05	C
ENSGACG00000004619	groupI-729	groupI	359014	359224	2.29	1.74e-05	C
ENSGACG00000004629	groupXIII-1144	groupXIII	2089794	2090010	3.85	9.27e-08	E
ENSGACG00000004668	groupXVIII-565	groupXVIII	1274787	1275003	3.44	5.28e-10	E
ENSGACG00000004687	groupXVI-1556	groupXVI	9986578	9986788	3.28	6.9e-05	C
ENSGACG00000004691	groupXIX-1209	groupXIX	6322226	6322436	3.92	1.99e-05	C
ENSGACG00000004695	groupXIX-1209	groupXIX	6322226	6322436	3.92	1.99e-05	C
ENSGACG00000004701	groupXXI-819	groupXXI	10071903	10072113	6.22	3.57e-09	C
ENSGACG00000004706	groupXXI-819	groupXXI	10071903	10072113	6.22	3.57e-09	C
ENSGACG00000004750	groupVI-532	groupVI	5867287	5867497	4.11	1.33e-10	C
ENSGACG00000004779	groupXV-501	groupXV	903798	904008	2.14	2.44e-06	C
ENSGACG00000004786	groupXV-501	groupXV	903798	904008	2.14	2.44e-06	C
ENSGACG00000004794	groupVIII-501	groupVIII	3250787	3250997	5.23	1.32e-16	C
ENSGACG00000004801	groupXII-889	groupXII	5076802	5077012	5.47	9.15e-14	C
ENSGACG00000004812	groupVIII-501	groupVIII	3250787	3250997	5.23	1.32e-16	C
ENSGACG00000004833	groupVI-532	groupVI	5867287	5867497	4.11	1.33e-10	C
ENSGACG00000004839	groupXII-1264	groupXII	5136856	5137066	5.23	1.02e-08	C
ENSGACG00000004849	groupXV-700	groupXV	1202421	1202631	2.58	1.26e-05	C
ENSGACG00000004851	groupXV-700	groupXV	1202421	1202631	2.58	1.26e-05	C
ENSGACG00000004852	groupXXI-495	groupXXI	10351064	10351274	2.51	3.27e-05	C
ENSGACG00000004870	groupXXI-488	groupXXI	10434271	10434487	2.43	2.08e-05	E
ENSGACG00000004874	groupXVII-172	groupXVII	2924661	2924871	2.27	9.11e-09	C
ENSGACG00000004880	groupXVII-172	groupXVII	2924661	2924871	2.27	9.11e-09	C
ENSGACG00000004886	groupXV-1025	groupXV	1266238	1266448	3.52	3.89e-07	C
ENSGACG00000004889	groupXVII-577	groupXVII	2949678	2949894	2.68	1.21e-07	E
ENSGACG00000004921	groupXIII-246	groupXIII	2467215	2467425	2.36	1.22e-08	C
ENSGACG00000004944	groupXII-1267	groupXII	5525949	5526159	3.73	3.91e-07	C
ENSGACG00000004953	groupXXI-1262	groupXXI	10667566	10667776	4.48	1.61e-05	C
ENSGACG00000004973	groupXII-1267	groupXII	5525949	5526159	3.73	3.91e-07	C
ENSGACG00000004974	groupV-447	groupV	6019869	6020079	3.53	1.66e-10	C
ENSGACG00000004995	groupV-447	groupV	6019869	6020079	3.53	1.66e-10	C
ENSGACG00000005014	groupV-572	groupV	6138712	6138922	2.7	3.3e-07	C
ENSGACG00000005027	groupXII-1508	groupXII	5568711	5568921	2.88	4.44e-05	C
ENSGACG00000005027	groupXII-470	groupXII	5573225	5573441	2.2	5.37e-06	E
ENSGACG00000005042	groupVI-564	groupVI	5935929	5936145	2.4	5.64e-06	E
ENSGACG00000005066	groupVI-564	groupVI	5935929	5936145	2.4	5.64e-06	E
ENSGACG00000005079	groupVI-229	groupVI	6080408	6080618	4.11	5.76e-18	C
ENSGACG00000005094	groupVI-229	groupVI	6080408	6080618	4.11	5.76e-18	C
ENSGACG00000005108	groupVI-533	groupVI	6095023	6095233	3.81	1.16e-11	C
ENSGACG00000005122	groupXX-468	groupXX	3452687	3452903	2.3	1e-06	E
ENSGACG00000005141	groupXXI-252	groupXXI	10991077	10991287	4.55	4.84e-16	C
ENSGACG00000005150	groupVI-533	groupVI	6095023	6095233	3.81	1.16e-11	C
ENSGACG00000005151	groupVIII-849	groupVIII	4114050	4114266	2.19	7.54e-05	E
ENSGACG00000005176	groupXIX-481	groupXIX	6715982	6716192	2.3	8.94e-05	C
ENSGACG00000005227	groupVI-353	groupVI	6193919	6194135	2.01	3.19e-05	E
ENSGACG00000005249	groupXI-575	groupXI	961248	961458	2.33	4.98e-06	C
ENSGACG00000005274	groupXIII-637	groupXIII	3062275	3062491	2.75	4.34e-08	E
ENSGACG00000005301	groupXX-450	groupXX	3788656	3788872	2.15	3.24e-06	E
ENSGACG00000005304	groupVI-839	groupVI	6280133	6280343	2.51	3.27e-05	C
ENSGACG00000005346	groupXXI-445	groupXXI	11153377	11153593	2.89	1.29e-06	E
ENSGACG00000005376	groupXVII-554	groupXVII	3669610	3669820	4.29	7.45e-12	C
ENSGACG00000005376	groupXVII-1174	groupXVII	3668851	3669061	6.72	8.31e-11	C
ENSGACG00000005409	groupXIII-101	groupXIII	3636515	3636725	2.42	8.09e-12	C
ENSGACG00000005409	groupXIII-596	groupXIII	3637070	3637280	2.64	1.75e-07	C
ENSGACG00000005449	groupXXI-529	groupXXI	11303583	11303793	3.08	3.73e-06	C
ENSGACG00000005449	groupXXI-315	groupXXI	11307811	11308027	2.21	3.68e-05	E
ENSGACG00000005455	groupXXI-315	groupXXI	11307811	11308027	2.21	3.68e-05	E
ENSGACG00000005462	groupXIII-820	groupXIII	3727541	3727751	6.57	7.02e-16	C
ENSGACG00000005474	groupXII-273	groupXII	5997301	5997517	2.24	9.74e-10	E
ENSGACG00000005485	groupXII-273	groupXII	5997301	5997517	2.24	9.74e-10	E
ENSGACG00000005491	groupVI-2030	groupVI	6462212	6462422	4.73	3.4e-06	C
ENSGACG00000005503	groupXX-453	groupXX	4226076	4226286	3.17	1.72e-09	C
ENSGACG00000005508	groupXIII-820	groupXIII	3727541	3727751	6.57	7.02e-16	C
ENSGACG00000005511	groupI-641	groupI	1405054	1405264	2.75	6.25e-09	C
ENSGACG00000005512	groupXVII-1626	groupXVII	3854892	3855102	14.18	4.52e-12	C
ENSGACG00000005523	groupI-641	groupI	1405054	1405264	2.75	6.25e-09	C
ENSGACG00000005545	groupXVII-1626	groupXVII	3854892	3855102	14.18	4.52e-12	C
ENSGACG00000005557	groupXXI-197	groupXXI	11516397	11516607	2.07	1.13e-05	C
ENSGACG00000005579	groupXII-296	groupXII	6459087	6459297	2.03	1.38e-06	C
ENSGACG00000005589	groupXI-555	groupXI	1443662	1443872	2.7	3.45e-09	C
ENSGACG00000005589	groupXI-1779	groupXI	1444347	1444557	3.28	6.9e-05	C
ENSGACG00000005593	groupXII-296	groupXII	6459087	6459297	2.03	1.38e-06	C
ENSGACG00000005605	groupXI-555	groupXI	1443662	1443872	2.7	3.45e-09	C
ENSGACG00000005605	groupXI-1779	groupXI	1444347	1444557	3.28	6.9e-05	C
ENSGACG00000005665	groupXVI-1292	groupXVI	10929598	10929808	3.23	1.76e-05	C
ENSGACG00000005671	groupXVI-1292	groupXVI	10929598	10929808	3.23	1.76e-05	C
ENSGACG00000005687	groupV-414	groupV	7502180	7502396	2.3	7.66e-06	E
ENSGACG00000005689	groupXIII-616	groupXIII	4020934	4021144	5.33	1.51e-15	C
ENSGACG00000005730	groupXII-391	groupXII	6928531	6928741	2.51	4.49e-08	C
ENSGACG00000005742	groupXII-391	groupXII	6928531	6928741	2.51	4.49e-08	C
ENSGACG00000005764	groupI-2567	groupI	1962433	1962643	3.55	7.63e-05	C
ENSGACG00000005766	groupI-2567	groupI	1962433	1962643	3.55	7.63e-05	C
ENSGACG00000005782	groupXII-1048	groupXII	7096046	7096256	3.17	1.17e-06	C
ENSGACG00000005811	groupXI-513	groupXI	2264169	2264385	2.06	1.52e-05	E
ENSGACG00000005820	groupI-512	groupI	2019030	2019240	2.02	1.04e-05	C
ENSGACG00000005822	groupXI-1306	groupXI	2325887	2326097	2.99	1.14e-05	C
ENSGACG00000005825	groupI-512	groupI	2019030	2019240	2.02	1.04e-05	C
ENSGACG00000005829	groupXVI-506	groupXVI	11218566	11218776	2.54	4.63e-07	C
ENSGACG00000005835	groupX-457	groupX	8356462	8356672	4.14	1.33e-14	C
ENSGACG00000005861	groupX-457	groupX	8356462	8356672	4.14	1.33e-14	C
ENSGACG00000005876	groupI-760	groupI	2098611	2098821	2.07	5.75e-05	C
ENSGACG00000005885	groupVI-2035	groupVI	7071428	7071638	4.73	3.4e-06	C
ENSGACG00000005889	groupXIX-638	groupXIX	7264509	7264719	2.51	3.27e-05	C
ENSGACG00000005899	groupXIX-356	groupXIX	7282920	7283136	2.26	3.27e-05	E
ENSGACG00000005909	groupXIX-792	groupXIX	7311964	7312180	2.39	9.25e-05	E
ENSGACG00000005914	groupXVI-159	groupXVI	11486516	11486726	2.18	1.52e-07	C
ENSGACG00000005926	groupXVII-1178	groupXVII	4219656	4219866	4.03	3.45e-07	C
ENSGACG00000005927	groupXIII-808	groupXIII	4388915	4389131	2.84	6.65e-08	E
ENSGACG00000005941	groupXVII-1178	groupXVII	4219656	4219866	4.03	3.45e-07	C
ENSGACG00000005947	groupX-899	groupX	8648780	8648990	2.82	8.65e-06	C
ENSGACG00000005961	groupX-899	groupX	8648780	8648990	2.82	8.65e-06	C
ENSGACG00000005964	groupVI-727	groupVI	7222888	7223104	2.6	1.46e-06	E
ENSGACG00000005975	groupXI-856	groupXI	2526656	2526866	2.76	6.42e-06	C
ENSGACG00000005989	groupXVIII-314	groupXVIII	3203894	3204110	2.13	5.26e-07	E
ENSGACG00000005990	groupXI-856	groupXI	2526656	2526866	2.76	6.42e-06	C
ENSGACG00000006014	groupVI-569	groupVI	7339071	7339287	2.23	6.75e-05	E
ENSGACG00000006044	groupVIII-847	groupVIII	6018860	6019070	2.41	1.56e-05	C
ENSGACG00000006153	groupXVII-1283	groupXVII	4904388	4904598	2.88	4.44e-05	C
ENSGACG00000006176	groupXV-655	groupXV	2580756	2580966	2.3	8.94e-05	C
ENSGACG00000006241	groupXII-1198	groupXII	7634549	7634759	3.98	1.01e-07	C
ENSGACG00000006262	groupXI-1190	groupXI	2724282	2724492	2.65	6.68e-05	C
ENSGACG00000006265	groupXI-1190	groupXI	2724282	2724492	2.65	6.68e-05	C
ENSGACG00000006307	groupXX-1832	groupXX	5864401	5864611	4.48	1.13e-06	C
ENSGACG00000006313	groupXIII-1179	groupXIII	4985160	4985370	3.98	1.01e-07	C
ENSGACG00000006333	groupXVI-1726	groupXVI	12138309	12138519	5.47	1.24e-07	C
ENSGACG00000006368	groupXV-239	groupXV	2780973	2781183	3.06	3.69e-14	C
ENSGACG00000006368	groupXV-1764	groupXV	2779317	2779527	5.47	1.24e-07	C
ENSGACG00000006374	groupV-679	groupV	8257266	8257476	3.07	9.64e-07	C
ENSGACG00000006374	groupV-1218	groupV	8254272	8254482	7.47	2.93e-08	C
ENSGACG00000006396	groupXVII-995	groupXVII	5041161	5041371	3.36	5.18e-06	C
ENSGACG00000006400	groupXI-957	groupXI	2852535	2852745	3.06	2.51e-07	C
ENSGACG00000006401	groupXI-957	groupXI	2852535	2852745	3.06	2.51e-07	C
ENSGACG00000006405	groupXIII-335	groupXIII	5054498	5054708	2.27	6.64e-08	C
ENSGACG00000006417	groupXVI-634	groupXVI	12249536	12249746	2.3	8.94e-05	C
ENSGACG00000006418	groupXIII-335	groupXIII	5054498	5054708	2.27	6.64e-08	C
ENSGACG00000006424	groupXVI-634	groupXVI	12249536	12249746	2.3	8.94e-05	C
ENSGACG00000006459	groupXX-2183	groupXX	6340399	6340609	7.47	2.93e-08	C
ENSGACG00000006521	groupXIX-301	groupXIX	7720646	7720856	2.14	2.44e-06	C
ENSGACG00000006559	groupI-218	groupI	3387069	3387285	2.28	1.6e-11	E
ENSGACG00000006573	groupI-218	groupI	3387069	3387285	2.28	1.6e-11	E
ENSGACG00000006618	groupXVI-364	groupXVI	12963229	12963445	2.33	2.36e-07	E
ENSGACG00000006622	groupXX-1590	groupXX	7431314	7431524	2.88	4.44e-05	C
ENSGACG00000006652	groupX-902	groupX	9311456	9311666	2.8	3.34e-05	C
ENSGACG00000006661	groupXV-523	groupXV	2955598	2955808	5.01	4.14e-14	C
ENSGACG00000006671	groupVI-478	groupVI	7979444	7979660	2.4	5.64e-06	E
ENSGACG00000006681	groupXVII-1189	groupXVII	5548034	5548244	3.2	4.53e-06	C
ENSGACG00000006741	groupXVII-457	groupXVII	5585091	5585307	2.34	8.65e-07	E
ENSGACG00000006752	groupXII-743	groupXII	8543076	8543286	2.55	8.87e-06	C
ENSGACG00000006753	groupXV-498	groupXV	3249085	3249301	2.07	4.15e-06	E
ENSGACG00000006756	groupXII-743	groupXII	8543076	8543286	2.55	8.87e-06	C
ENSGACG00000006766	groupXVIII-972	groupXVIII	5220056	5220266	4.23	5.89e-09	C
ENSGACG00000006852	groupXI-1314	groupXI	3539900	3540110	2.99	2.94e-06	C
ENSGACG00000006854	groupXVII-320	groupXVII	5650209	5650419	2.27	1.44e-07	C
ENSGACG00000006855	groupXVI-985	groupXVI	13691621	13691831	3.86	1.01e-07	C
ENSGACG00000006867	groupXI-1314	groupXI	3539900	3540110	2.99	2.94e-06	C
ENSGACG00000006883	groupXX-1710	groupXX	7712212	7712422	3.28	6.9e-05	C
ENSGACG00000006886	groupXVI-985	groupXVI	13691621	13691831	3.86	1.01e-07	C
ENSGACG00000006896	groupXI-522	groupXI	3670157	3670367	2.28	7.18e-07	C
ENSGACG00000006908	groupI-1770	groupI	4275032	4275248	2.57	6.24e-05	E
ENSGACG00000006926	groupXV-1548	groupXV	3666102	3666312	3.73	5.42e-06	C
ENSGACG00000006931	groupXV-762	groupXV	3684318	3684534	2.07	9.76e-05	E
ENSGACG00000006967	groupX-1089	groupX	9656912	9657122	5.04	1.02e-08	C
ENSGACG00000006994	groupXVII-1192	groupXVII	5746166	5746376	2.99	4.44e-05	C
ENSGACG00000007003	groupXI-820	groupXI	3742491	3742701	2.35	2.57e-05	C
ENSGACG00000007017	groupXII-1522	groupXII	9061864	9062074	2.71	9.4e-05	C
ENSGACG00000007026	groupXI-820	groupXI	3742491	3742701	2.35	2.57e-05	C
ENSGACG00000007045	groupXX-930	groupXX	7885846	7886056	3.07	9.64e-07	C
ENSGACG00000007048	groupXIII-1341	groupXIII	6146166	6146376	3.09	1.45e-05	C
ENSGACG00000007048	groupXIII-1779	groupXIII	6144406	6144616	4.85	5.16e-08	C
ENSGACG00000007072	groupXIII-1341	groupXIII	6146166	6146376	3.09	1.45e-05	C
ENSGACG00000007072	groupXIII-1779	groupXIII	6144406	6144616	4.85	5.16e-08	C
ENSGACG00000007117	groupI-1026	groupI	4756676	4756886	2.53	6.21e-06	C
ENSGACG00000007122	groupVIII-1131	groupVIII	7951285	7951501	2.49	3.64e-05	E
ENSGACG00000007125	groupI-1026	groupI	4756676	4756886	2.53	6.21e-06	C
ENSGACG00000007146	groupXVI-703	groupXVI	14101548	14101758	2.24	8.94e-05	C
ENSGACG00000007163	groupXX-1243	groupXX	8112706	8112916	3.86	1.01e-07	C
ENSGACG00000007164	groupXII-720	groupXII	9392807	9393017	2.07	5.75e-05	C
ENSGACG00000007166	groupXIX-1217	groupXIX	8347301	8347511	8.21	4.8e-10	C
ENSGACG00000007166	groupXIX-1560	groupXIX	8350769	8350979	8.58	5.61e-11	C
ENSGACG00000007170	groupXX-1243	groupXX	8112706	8112916	3.86	1.01e-07	C
ENSGACG00000007186	groupXIX-1217	groupXIX	8347301	8347511	8.21	4.8e-10	C
ENSGACG00000007186	groupXIX-1560	groupXIX	8350769	8350979	8.58	5.61e-11	C
ENSGACG00000007255	groupVI-594	groupVI	8369008	8369218	2.04	8.02e-05	C
ENSGACG00000007257	groupVI-594	groupVI	8369008	8369218	2.04	8.02e-05	C
ENSGACG00000007279	groupXIII-759	groupXIII	6491039	6491249	2.35	3.79e-05	C
ENSGACG00000007282	groupXVI-346	groupXVI	14132414	14132624	2.69	6.49e-08	C
ENSGACG00000007282	groupXVI-770	groupXVI	14127592	14127802	2.24	8.94e-05	C
ENSGACG00000007285	groupVI-893	groupVI	8383261	8383471	2.54	4.69e-05	C
ENSGACG00000007288	groupVIII-2090	groupVIII	8352304	8352514	3.55	7.63e-05	C
ENSGACG00000007293	groupX-1210	groupX	10545377	10545587	2.71	9.4e-05	C
ENSGACG00000007301	groupXV-528	groupXV	4207501	4207711	2.88	1.08e-08	C
ENSGACG00000007312	groupXIII-1346	groupXIII	6521215	6521425	3.61	1.46e-06	C
ENSGACG00000007313	groupXII-825	groupXII	9552131	9552341	2.65	4.68e-06	C
ENSGACG00000007314	groupXI-1083	groupXI	4215125	4215341	2.34	5.16e-05	E
ENSGACG00000007315	groupXIII-1346	groupXIII	6521215	6521425	3.61	1.46e-06	C
ENSGACG00000007318	groupXI-1083	groupXI	4215125	4215341	2.34	5.16e-05	E
ENSGACG00000007325	groupXII-825	groupXII	9552131	9552341	2.65	4.68e-06	C
ENSGACG00000007350	groupXX-889	groupXX	8274217	8274427	3.2	4.53e-06	C
ENSGACG00000007358	groupXVII-1300	groupXVII	6173188	6173398	3.28	6.9e-05	C
ENSGACG00000007365	groupXVII-1300	groupXVII	6173188	6173398	3.28	6.9e-05	C
ENSGACG00000007374	groupI-1059	groupI	5550385	5550595	3.14	7.98e-08	C
ENSGACG00000007376	groupXII-2150	groupXII	9722149	9722359	4.73	3.4e-06	C
ENSGACG00000007376	groupXII-944	groupXII	9732264	9732480	2.29	5.96e-05	E
ENSGACG00000007412	groupXX-372	groupXX	8558219	8558429	2.02	3.1e-06	C
ENSGACG00000007443	groupXI-507	groupXI	4314631	4314841	3.03	2.24e-11	C
ENSGACG00000007443	groupXI-1253	groupXI	4311287	4311497	5.23	1.02e-08	C
ENSGACG00000007443	groupXI-1559	groupXI	4309451	4309661	4.67	2.48e-07	C
ENSGACG00000007447	groupXI-507	groupXI	4314631	4314841	3.03	2.24e-11	C
ENSGACG00000007447	groupXI-1253	groupXI	4311287	4311497	5.23	1.02e-08	C
ENSGACG00000007449	groupXI-960	groupXI	4373988	4374198	6.35	1.57e-12	C
ENSGACG00000007465	groupXVII-652	groupXVII	6350058	6350268	3.15	3.05e-07	C
ENSGACG00000007465	groupXVII-1528	groupXVII	6352334	6352544	7.84	3.87e-09	C
ENSGACG00000007465	groupXVII-1654	groupXVII	6351431	6351641	3.92	1.99e-05	C
ENSGACG00000007471	groupXVII-652	groupXVII	6350058	6350268	3.15	3.05e-07	C
ENSGACG00000007471	groupXVII-1528	groupXVII	6352334	6352544	7.84	3.87e-09	C
ENSGACG00000007471	groupXVII-1654	groupXVII	6351431	6351641	3.92	1.99e-05	C
ENSGACG00000007477	groupXI-1197	groupXI	4561047	4561257	3.17	1.17e-06	C
ENSGACG00000007524	groupXII-1059	groupXII	9925423	9925633	2.78	1.69e-06	C
ENSGACG00000007524	groupXII-401	groupXII	9945070	9945286	2.22	1.94e-07	E
ENSGACG00000007527	groupXII-401	groupXII	9945070	9945286	2.22	1.94e-07	E
ENSGACG00000007546	groupXX-1496	groupXX	8882105	8882315	4.29	1.13e-06	C
ENSGACG00000007549	groupXI-1164	groupXI	4642527	4642743	2.57	6.24e-05	E
ENSGACG00000007557	groupXX-1496	groupXX	8882105	8882315	4.29	1.13e-06	C
ENSGACG00000007563	groupXX-1496	groupXX	8882105	8882315	4.29	1.13e-06	C
ENSGACG00000007564	groupXIII-1664	groupXIII	7249332	7249542	5.97	2.16e-08	C
ENSGACG00000007567	groupXI-1164	groupXI	4642527	4642743	2.57	6.24e-05	E
ENSGACG00000007572	groupXII-2001	groupXII	9980754	9980964	5.72	2.16e-08	C
ENSGACG00000007576	groupXIII-1664	groupXIII	7249332	7249542	5.97	2.16e-08	C
ENSGACG00000007583	groupXVII-1812	groupXVII	6440109	6440319	13.44	6.36e-11	C
ENSGACG00000007586	groupVI-547	groupVI	8852908	8853118	2.59	4.63e-07	C
ENSGACG00000007599	groupXII-2001	groupXII	9980754	9980964	5.72	2.16e-08	C
ENSGACG00000007620	groupVI-547	groupVI	8852908	8853118	2.59	4.63e-07	C
ENSGACG00000007647	groupVI-2058	groupVI	8890050	8890260	4.11	4.89e-06	C
ENSGACG00000007650	groupVIII-1909	groupVIII	8660558	8660768	12.69	8.32e-10	C
ENSGACG00000007668	groupXX-544	groupXX	8984008	8984224	2.01	5.93e-05	E
ENSGACG00000007669	groupVIII-1909	groupVIII	8660558	8660768	12.69	8.32e-10	C
ENSGACG00000007696	groupXIII-1012	groupXIII	7432129	7432339	3.73	3.91e-07	C
ENSGACG00000007721	groupI-3103	groupI	6041698	6041908	3.73	7.63e-05	C
ENSGACG00000007727	groupV-488	groupV	9682203	9682413	2.29	1.74e-05	C
ENSGACG00000007727	groupV-704	groupV	9696594	9696804	3.55	2.93e-08	C
ENSGACG00000007728	groupI-989	groupI	6148033	6148243	2.2	1.8e-05	C
ENSGACG00000007740	groupVI-1185	groupVI	9112015	9112225	5.04	1.02e-08	C
ENSGACG00000007749	groupVI-1185	groupVI	9112015	9112225	5.04	1.02e-08	C
ENSGACG00000007750	groupV-704	groupV	9696594	9696804	3.55	2.93e-08	C
ENSGACG00000007754	groupI-3105	groupI	6160893	6161103	3.55	7.63e-05	C
ENSGACG00000007761	groupXX-751	groupXX	9194860	9195070	2.8	4.45e-07	C
ENSGACG00000007761	groupXX-516	groupXX	9181177	9181393	2.03	1.62e-05	E
ENSGACG00000007779	groupXIX-1441	groupXIX	8869844	8870054	3.92	1.99e-05	C
ENSGACG00000007786	groupXIX-1441	groupXIX	8869844	8870054	3.92	1.99e-05	C
ENSGACG00000007787	groupXIX-359	groupXIX	8883674	8883890	2.07	9.76e-05	E
ENSGACG00000007815	groupX-696	groupX	12000572	12000782	2.44	8.21e-05	C
ENSGACG00000007819	groupX-748	groupX	12064016	12064232	2.68	2.39e-06	E
ENSGACG00000007829	groupXIX-359	groupXIX	8883674	8883890	2.07	9.76e-05	E
ENSGACG00000007843	groupVIII-149	groupVIII	8869101	8869311	4.58	1.48e-23	C
ENSGACG00000007843	groupVIII-984	groupVIII	8871702	8871912	3.17	1.17e-06	C
ENSGACG00000007885	groupVIII-1181	groupVIII	8983327	8983537	2.54	4.69e-05	C
ENSGACG00000007897	groupXX-588	groupXX	9257828	9258038	6.1	8.2e-17	C
ENSGACG00000007921	groupXX-588	groupXX	9257828	9258038	6.1	8.2e-17	C
ENSGACG00000007930	groupXV-576	groupXV	5123268	5123478	2.13	1.19e-05	C
ENSGACG00000007933	groupXX-589	groupXX	9288733	9288943	2.87	4.08e-08	C
ENSGACG00000007959	groupXVI-673	groupXVI	15780138	15780348	2.65	4.68e-06	C
ENSGACG00000007959	groupXVI-874	groupXVI	15781271	15781481	4.35	1.34e-09	C
ENSGACG00000007962	groupXI-1389	groupXI	4963919	4964129	4.18	3.45e-07	C
ENSGACG00000007962	groupXI-1562	groupXI	4964553	4964763	3.88	1.4e-06	C
ENSGACG00000007966	groupXV-576	groupXV	5123268	5123478	2.13	1.19e-05	C
ENSGACG00000007966	groupXV-783	groupXV	5135731	5135941	2.8	4.45e-07	C
ENSGACG00000007970	groupXV-783	groupXV	5135731	5135941	2.8	4.45e-07	C
ENSGACG00000007974	groupVIII-208	groupVIII	9249410	9249620	2.32	3.94e-09	C
ENSGACG00000007974	groupVIII-310	groupVIII	9238061	9238271	3.79	1.46e-15	C
ENSGACG00000007974	groupVIII-465	groupVIII	9250612	9250822	2.39	7.3e-06	C
ENSGACG00000007974	groupVIII-781	groupVIII	9248501	9248711	2.38	8.21e-05	C
ENSGACG00000007978	groupXI-1389	groupXI	4963919	4964129	4.18	3.45e-07	C
ENSGACG00000007978	groupXI-1562	groupXI	4964553	4964763	3.88	1.4e-06	C
ENSGACG00000007983	groupVIII-208	groupVIII	9249410	9249620	2.32	3.94e-09	C
ENSGACG00000007983	groupVIII-465	groupVIII	9250612	9250822	2.39	7.3e-06	C
ENSGACG00000007983	groupVIII-781	groupVIII	9248501	9248711	2.38	8.21e-05	C
ENSGACG00000007989	groupXVI-817	groupXVI	15808799	15809009	5.82	1.7e-13	C
ENSGACG00000008033	groupXVII-623	groupXVII	7128903	7129113	5.35	9.15e-14	C
ENSGACG00000008043	groupXIII-1013	groupXIII	8161984	8162194	2.51	3.27e-05	C
ENSGACG00000008051	groupV-489	groupV	9915096	9915306	3.73	4.46e-11	C
ENSGACG00000008074	groupXIII-1013	groupXIII	8161984	8162194	2.51	3.27e-05	C
ENSGACG00000008085	groupXVII-623	groupXVII	7128903	7129113	5.35	9.15e-14	C
ENSGACG00000008090	groupXI-781	groupXI	5071060	5071270	2.29	1.74e-05	C
ENSGACG00000008092	groupX-269	groupX	12448595	12448805	2.04	7.52e-06	C
ENSGACG00000008112	groupXVIII-439	groupXVIII	7441302	7441512	2.33	3.39e-06	C
ENSGACG00000008117	groupXVIII-439	groupXVIII	7441302	7441512	2.33	3.39e-06	C
ENSGACG00000008140	groupVIII-450	groupVIII	9336516	9336726	2.04	2.35e-05	C
ENSGACG00000008140	groupVIII-671	groupVIII	9345939	9346149	2.15	6.01e-05	C
ENSGACG00000008151	groupXV-1662	groupXV	5454470	5454680	9.7	6.48e-13	C
ENSGACG00000008157	groupXII-902	groupXII	10402282	10402492	2.65	4.68e-06	C
ENSGACG00000008171	groupVIII-671	groupVIII	9345939	9346149	2.15	6.01e-05	C
ENSGACG00000008173	groupVIII-540	groupVIII	9360226	9360442	2.31	2.86e-05	E
ENSGACG00000008189	groupXVI-708	groupXVI	16070945	16071155	2.38	8.21e-05	C
ENSGACG00000008193	groupI-1145	groupI	6828027	6828237	3.06	2.51e-07	C
ENSGACG00000008198	groupI-1145	groupI	6828027	6828237	3.06	2.51e-07	C
ENSGACG00000008203	groupXVI-708	groupXVI	16070945	16071155	2.38	8.21e-05	C
ENSGACG00000008205	groupV-179	groupV	10065798	10066008	2.21	9.53e-09	C
ENSGACG00000008211	groupV-179	groupV	10065798	10066008	2.21	9.53e-09	C
ENSGACG00000008225	groupX-471	groupX	12621309	12621525	2.03	1.62e-05	E
ENSGACG00000008257	groupXIII-866	groupXIII	8332309	8332525	2.78	3.78e-06	E
ENSGACG00000008270	groupV-760	groupV	10264667	10264883	3.17	5.73e-07	E
ENSGACG00000008281	groupXVIII-170	groupXVIII	7562884	7563094	2.6	2.62e-10	C
ENSGACG00000008290	groupX-621	groupX	12775733	12775949	2.07	5.24e-05	E
ENSGACG00000008317	groupXX-2010	groupXX	9752526	9752736	5.72	2.16e-08	C
ENSGACG00000008323	groupXVII-901	groupXVII	7878103	7878313	2.61	1.77e-05	C
ENSGACG00000008327	groupXX-1724	groupXX	9753848	9754058	32.85	4.42e-19	C
ENSGACG00000008327	groupXX-2010	groupXX	9752526	9752736	5.72	2.16e-08	C
ENSGACG00000008334	groupXX-1724	groupXX	9753848	9754058	32.85	4.42e-19	C
ENSGACG00000008340	groupXVIII-170	groupXVIII	7562884	7563094	2.6	2.62e-10	C
ENSGACG00000008344	groupI-688	groupI	7086765	7086975	4.15	2.38e-12	C
ENSGACG00000008344	groupI-1300	groupI	7077437	7077647	2.57	6.68e-05	C
ENSGACG00000008351	groupI-688	groupI	7086765	7086975	4.15	2.38e-12	C
ENSGACG00000008351	groupI-1300	groupI	7077437	7077647	2.57	6.68e-05	C
ENSGACG00000008360	groupXV-360	groupXV	5617728	5617944	2.05	1.31e-06	E
ENSGACG00000008375	groupXI-896	groupXI	5238512	5238722	3.32	9.34e-08	C
ENSGACG00000008377	groupXI-896	groupXI	5238512	5238722	3.32	9.34e-08	C
ENSGACG00000008392	groupXVII-901	groupXVII	7878103	7878313	2.61	1.77e-05	C
ENSGACG00000008413	groupI-1054	groupI	7462898	7463114	2.29	5.96e-05	E
ENSGACG00000008414	groupV-384	groupV	10432100	10432316	2.5	1.17e-07	E
ENSGACG00000008427	groupXII-1363	groupXII	10538879	10539089	3.52	3.89e-07	C
ENSGACG00000008445	groupVIII-1340	groupVIII	9641377	9641587	4.03	3.45e-07	C
ENSGACG00000008473	groupXI-1258	groupXI	5478823	5479033	3.08	3.73e-06	C
ENSGACG00000008483	groupXI-1258	groupXI	5478823	5479033	3.08	3.73e-06	C
ENSGACG00000008501	groupXI-1353	groupXI	5524548	5524764	2.79	8.01e-06	E
ENSGACG00000008505	groupX-1225	groupX	12986643	12986853	10.08	6.44e-14	C
ENSGACG00000008510	groupXI-1353	groupXI	5524548	5524764	2.79	8.01e-06	E
ENSGACG00000008521	groupXVI-114	groupXVI	16908029	16908239	2.26	1.26e-09	C
ENSGACG00000008521	groupXVI-1593	groupXVI	16897409	16897619	3.58	1.99e-05	C
ENSGACG00000008531	groupXIX-16	groupXIX	9506416	9506626	7.88	2.84e-67	C
ENSGACG00000008531	groupXIX-969	groupXIX	9507378	9507588	8.96	5.61e-11	C
ENSGACG00000008533	groupXV-383	groupXV	5804887	5805097	2.24	3.29e-07	C
ENSGACG00000008536	groupXIX-16	groupXIX	9506416	9506626	7.88	2.84e-67	C
ENSGACG00000008536	groupXIX-190	groupXIX	9515724	9515934	5.04	5.17e-23	C
ENSGACG00000008536	groupXIX-969	groupXIX	9507378	9507588	8.96	5.61e-11	C
ENSGACG00000008539	groupXV-383	groupXV	5804887	5805097	2.24	3.29e-07	C
ENSGACG00000008542	groupXV-990	groupXV	5812818	5813028	3.15	3.05e-07	C
ENSGACG00000008588	groupVIII-1921	groupVIII	9733366	9733576	4.11	4.89e-06	C
ENSGACG00000008607	groupXI-1810	groupXI	5746923	5747133	3.11	5.69e-05	C
ENSGACG00000008622	groupVIII-482	groupVIII	9759824	9760040	2.03	3.01e-05	E
ENSGACG00000008623	groupXVIII-578	groupXVIII	8145484	8145694	2.92	2e-07	C
ENSGACG00000008630	groupXII-775	groupXII	10778956	10779166	2.87	4.08e-08	C
ENSGACG00000008636	groupVIII-488	groupVIII	9794019	9794229	2.07	5.75e-05	C
ENSGACG00000008643	groupVIII-488	groupVIII	9794019	9794229	2.07	5.75e-05	C
ENSGACG00000008645	groupXII-775	groupXII	10778956	10779166	2.87	4.08e-08	C
ENSGACG00000008647	groupVIII-623	groupVIII	9828237	9828447	6.42	7.02e-16	C
ENSGACG00000008647	groupVIII-706	groupVIII	9828722	9828932	2.78	1.69e-06	C
ENSGACG00000008669	groupX-872	groupX	13049063	13049273	4.6	2.96e-10	C
ENSGACG00000008677	groupVIII-623	groupVIII	9828237	9828447	6.42	7.02e-16	C
ENSGACG00000008677	groupVIII-706	groupVIII	9828722	9828932	2.78	1.69e-06	C
ENSGACG00000008679	groupXI-712	groupXI	5884257	5884467	3.55	1.28e-11	C
ENSGACG00000008722	groupI-937	groupI	7671593	7671809	2.17	4.08e-05	E
ENSGACG00000008724	groupXV-1214	groupXV	5972311	5972521	4.33	8.11e-08	C
ENSGACG00000008740	groupXI-712	groupXI	5884257	5884467	3.55	1.28e-11	C
ENSGACG00000008754	groupXIII-1127	groupXIII	8839741	8839951	3.31	1.35e-06	C
ENSGACG00000008766	groupXIII-1127	groupXIII	8839741	8839951	3.31	1.35e-06	C
ENSGACG00000008769	groupXIII-1800	groupXIII	8873909	8874119	17.92	1.09e-15	C
ENSGACG00000008778	groupXIII-1800	groupXIII	8873909	8874119	17.92	1.09e-15	C
ENSGACG00000008794	groupXVII-1423	groupXVII	8429979	8430189	3.28	6.9e-05	C
ENSGACG00000008795	groupXV-1214	groupXV	5972311	5972521	4.33	8.11e-08	C
ENSGACG00000008819	groupXX-667	groupXX	10255682	10255892	2.7	3.3e-07	C
ENSGACG00000008821	groupVIII-415	groupVIII	10353803	10354013	6.22	1.32e-17	C
ENSGACG00000008836	groupXV-454	groupXV	6075352	6075568	3.68	8.23e-13	E
ENSGACG00000008845	groupXV-454	groupXV	6075352	6075568	3.68	8.23e-13	E
ENSGACG00000008845	groupXV-1256	groupXV	6081632	6081848	2.57	6.24e-05	E
ENSGACG00000008922	groupX-557	groupX	13530124	13530340	2.33	1.79e-06	E
ENSGACG00000008944	groupXII-595	groupXII	11022494	11022704	2.93	3.63e-09	C
ENSGACG00000008945	groupXVII-1424	groupXVII	8571335	8571545	5.72	2.16e-08	C
ENSGACG00000008945	groupXVII-1833	groupXVII	8572653	8572863	12.69	8.32e-10	C
ENSGACG00000008955	groupXV-732	groupXV	6199099	6199309	4.69	4.85e-12	C
ENSGACG00000008968	groupXV-732	groupXV	6199099	6199309	4.69	4.85e-12	C
ENSGACG00000008988	groupI-767	groupI	7983026	7983236	2.13	1.19e-05	C
ENSGACG00000008993	groupI-767	groupI	7983026	7983236	2.13	1.19e-05	C
ENSGACG00000009134	groupVIII-544	groupVIII	11349840	11350050	3.3	5.25e-10	C
ENSGACG00000009157	groupXIII-2102	groupXIII	9173686	9173896	5.23	6.7e-07	C
ENSGACG00000009198	groupVIII-1059	groupVIII	11428541	11428751	2.57	6.68e-05	C
ENSGACG00000009227	groupXII-1729	groupXII	11345149	11345359	3.36	5.18e-06	C
ENSGACG00000009263	groupXII-1729	groupXII	11345149	11345359	3.36	5.18e-06	C
ENSGACG00000009269	groupXI-786	groupXI	6511556	6511766	2.91	7.64e-07	C
ENSGACG00000009338	groupX-1042	groupX	14458369	14458579	3.48	5.18e-06	C
ENSGACG00000009342	groupXIX-334	groupXIX	10441526	10441742	2.25	8.72e-06	E
ENSGACG00000009363	groupI-1612	groupI	8953189	8953399	3.73	2.85e-08	C
ENSGACG00000009363	groupI-2453	groupI	8952071	8952281	4.67	2.48e-07	C
ENSGACG00000009381	groupXI-1096	groupXI	6593077	6593287	2.35	3.79e-05	C
ENSGACG00000009381	groupXI-2070	groupXI	6593989	6594199	3.43	1.99e-05	C
ENSGACG00000009383	groupI-849	groupI	8999868	9000084	2.07	5.24e-05	E
ENSGACG00000009385	groupVI-1005	groupVI	11052363	11052573	3.98	1.01e-07	C
ENSGACG00000009469	groupI-648	groupI	9177798	9178008	2.1	5.3e-06	C
ENSGACG00000009477	groupXV-580	groupXV	7337399	7337609	3.33	1.97e-09	C
ENSGACG00000009482	groupXV-586	groupXV	7373548	7373764	2.11	1.31e-05	E
ENSGACG00000009487	groupXI-749	groupXI	6738475	6738691	2.49	5.12e-07	E
ENSGACG00000009488	groupXV-586	groupXV	7373548	7373764	2.11	1.31e-05	E
ENSGACG00000009491	groupI-648	groupI	9177798	9178008	2.1	5.3e-06	C
ENSGACG00000009504	groupXVIII-1866	groupXVIII	9225800	9226010	3.28	6.9e-05	C
ENSGACG00000009511	groupXVII-1557	groupXVII	9692885	9693095	4.48	1.13e-06	C
ENSGACG00000009511	groupXVII-513	groupXVII	9702754	9702970	2.6	6.92e-07	E
ENSGACG00000009522	groupXI-749	groupXI	6738475	6738691	2.49	5.12e-07	E
ENSGACG00000009541	groupXVII-513	groupXVII	9702754	9702970	2.6	6.92e-07	E
ENSGACG00000009558	groupXI-570	groupXI	6923358	6923574	2.13	4.48e-05	E
ENSGACG00000009558	groupXI-863	groupXI	6938592	6938808	3.01	1.54e-08	E
ENSGACG00000009558	groupXI-828	groupXI	6883667	6883883	2.33	1.38e-05	E
ENSGACG00000009563	groupXVII-766	groupXVII	9724994	9725204	3.07	9.64e-07	C
ENSGACG00000009569	groupXII-614	groupXII	11918983	11919199	2.21	9.81e-06	E
ENSGACG00000009574	groupXII-614	groupXII	11918983	11919199	2.21	9.81e-06	E
ENSGACG00000009593	groupX-710	groupX	14704208	14704424	2.99	4.24e-07	E
ENSGACG00000009597	groupVI-1161	groupVI	11420066	11420282	2.47	7.72e-05	E
ENSGACG00000009603	groupXV-996	groupXV	7602371	7602581	5.41	1.92e-09	C
ENSGACG00000009605	groupXIX-1127	groupXIX	10924333	10924543	3.43	1.99e-05	C
ENSGACG00000009607	groupVIII-271	groupVIII	12441795	12442005	2.51	2.45e-09	C
ENSGACG00000009620	groupXV-716	groupXV	7604801	7605011	3.55	2.93e-08	C
ENSGACG00000009620	groupXV-872	groupXV	7603656	7603866	5.23	4.91e-13	C
ENSGACG00000009620	groupXV-996	groupXV	7602371	7602581	5.41	1.92e-09	C
ENSGACG00000009620	groupXV-547	groupXV	7625991	7626207	2.15	2.21e-05	E
ENSGACG00000009653	groupX-112	groupX	14756436	14756652	2.32	4.38e-11	E
ENSGACG00000009656	groupI-521	groupI	9558372	9558582	2.06	1.69e-05	C
ENSGACG00000009656	groupI-1100	groupI	9556405	9556615	2.19	9.03e-05	C
ENSGACG00000009668	groupI-521	groupI	9558372	9558582	2.06	1.69e-05	C
ENSGACG00000009673	groupXII-1542	groupXII	12015004	12015214	10.45	6.44e-14	C
ENSGACG00000009691	groupXII-777	groupXII	12097297	12097507	2.61	3.37e-06	C
ENSGACG00000009691	groupXII-1544	groupXII	12076557	12076767	2.71	9.4e-05	C
ENSGACG00000009691	groupXII-1542	groupXII	12015004	12015214	10.45	6.44e-14	C
ENSGACG00000009706	groupXII-777	groupXII	12097297	12097507	2.61	3.37e-06	C
ENSGACG00000009720	groupVI-116	groupVI	11869800	11870010	2.34	2.32e-10	C
ENSGACG00000009731	groupX-17	groupX	14987135	14987345	2.1	7.43e-15	C
ENSGACG00000009731	groupX-150	groupX	14988116	14988326	2.22	1.33e-09	C
ENSGACG00000009744	groupX-150	groupX	14988116	14988326	2.22	1.33e-09	C
ENSGACG00000009791	groupXI-1053	groupXI	7402041	7402251	2.99	2.94e-06	C
ENSGACG00000009810	groupXV-1826	groupXV	7992618	7992828	3.43	1.99e-05	C
ENSGACG00000009827	groupXV-621	groupXV	8029348	8029564	2.12	2.42e-05	E
ENSGACG00000009831	groupXII-836	groupXII	12218979	12219189	3.43	2.14e-09	C
ENSGACG00000009839	groupXIII-646	groupXIII	9611786	9612002	2.34	6.62e-06	E
ENSGACG00000009889	groupX-1820	groupX	15270471	15270681	4.48	1.13e-06	C
ENSGACG00000009891	groupI-1725	groupI	9856539	9856749	3.09	1.45e-05	C
ENSGACG00000009901	groupVI-292	groupVI	11993454	11993664	2.01	4.64e-06	C
ENSGACG00000009905	groupXIII-778	groupXIII	9691340	9691556	2.19	2e-05	E
ENSGACG00000009909	groupXVIII-1256	groupXVIII	9557669	9557879	5.97	2.16e-08	C
ENSGACG00000009909	groupXVIII-1257	groupXVIII	9559740	9559950	10.08	6.44e-14	C
ENSGACG00000009912	groupI-1725	groupI	9856539	9856749	3.09	1.45e-05	C
ENSGACG00000009913	groupXVIII-1256	groupXVIII	9557669	9557879	5.97	2.16e-08	C
ENSGACG00000009913	groupXVIII-1257	groupXVIII	9559740	9559950	10.08	6.44e-14	C
ENSGACG00000009920	groupXV-358	groupXV	8073615	8073825	3.09	3.86e-10	C
ENSGACG00000009923	groupX-1820	groupX	15270471	15270681	4.48	1.13e-06	C
ENSGACG00000009928	groupVIII-644	groupVIII	12620696	12620906	3.14	7.98e-08	C
ENSGACG00000009936	groupI-831	groupI	9931572	9931782	3.12	2.1e-08	C
ENSGACG00000009944	groupI-831	groupI	9931572	9931782	3.12	2.1e-08	C
ENSGACG00000009986	groupXV-511	groupXV	8282103	8282313	2.11	8.66e-05	C
ENSGACG00000009991	groupXVIII-376	groupXVIII	9664515	9664725	2.4	2.76e-07	C
ENSGACG00000009991	groupXVIII-647	groupXVIII	9664980	9665190	2.45	4.32e-06	C
ENSGACG00000009991	groupXVIII-1479	groupXVIII	9666328	9666538	3.92	1.99e-05	C
ENSGACG00000010035	groupVIII-546	groupVIII	12751561	12751771	2.08	3.82e-05	C
ENSGACG00000010046	groupXVII-618	groupXVII	10337081	10337297	2.36	3.19e-06	E
ENSGACG00000010058	groupVI-689	groupVI	12217303	12217513	4.48	1.34e-09	C
ENSGACG00000010090	groupXVII-1435	groupXVII	10464512	10464722	16.42	1.87e-14	C
ENSGACG00000010094	groupXIX-484	groupXIX	11800223	11800433	2.19	2.69e-05	C
ENSGACG00000010102	groupXII-1634	groupXII	12465586	12465796	3.58	1.99e-05	C
ENSGACG00000010104	groupVIII-1193	groupVIII	12841457	12841667	2.82	8.65e-06	C
ENSGACG00000010114	groupXIX-484	groupXIX	11800223	11800433	2.19	2.69e-05	C
ENSGACG00000010115	groupI-203	groupI	10101549	10101759	2.32	2.21e-11	C
ENSGACG00000010118	groupXII-1634	groupXII	12465586	12465796	3.58	1.99e-05	C
ENSGACG00000010151	groupI-203	groupI	10101549	10101759	2.32	2.21e-11	C
ENSGACG00000010159	groupXI-1409	groupXI	7908694	7908904	4.33	8.11e-08	C
ENSGACG00000010159	groupXI-2429	groupXI	7908069	7908279	7.47	2.93e-08	C
ENSGACG00000010165	groupXI-1409	groupXI	7908694	7908904	4.33	8.11e-08	C
ENSGACG00000010165	groupXI-2429	groupXI	7908069	7908279	7.47	2.93e-08	C
ENSGACG00000010168	groupXIX-375	groupXIX	11862116	11862332	2.14	1.2e-05	E
ENSGACG00000010183	groupXVII-607	groupXVII	10567852	10568062	5.12	4.14e-14	C
ENSGACG00000010185	groupXVII-607	groupXVII	10567852	10568062	5.12	4.14e-14	C
ENSGACG00000010190	groupXII-1455	groupXII	12764271	12764481	4.48	1.13e-06	C
ENSGACG00000010200	groupXX-165	groupXX	11754497	11754707	2.69	3.72e-11	C
ENSGACG00000010200	groupXX-541	groupXX	11750456	11750666	2.99	5.23e-08	C
ENSGACG00000010207	groupXX-165	groupXX	11754497	11754707	2.69	3.72e-11	C
ENSGACG00000010224	groupXIX-1227	groupXIX	11957538	11957748	4.11	4.89e-06	C
ENSGACG00000010226	groupI-1620	groupI	10338794	10339004	4.03	3.45e-07	C
ENSGACG00000010226	groupI-1728	groupI	10334662	10334872	3.86	1.01e-07	C
ENSGACG00000010230	groupXIX-1227	groupXIX	11957538	11957748	4.11	4.89e-06	C
ENSGACG00000010236	groupXV-876	groupXV	8696157	8696373	2.23	6.75e-05	E
ENSGACG00000010248	groupV-143	groupV	12177435	12177651	2.01	3.84e-08	E
ENSGACG00000010263	groupXI-184	groupXI	7954417	7954627	4.2	8.62e-25	C
ENSGACG00000010263	groupXI-833	groupXI	7953879	7954089	3.9	3.97e-11	C
ENSGACG00000010263	groupXI-1101	groupXI	7957629	7957839	4.16	4.32e-10	C
ENSGACG00000010263	groupXI-1160	groupXI	7957044	7957254	4.73	6.28e-11	C
ENSGACG00000010269	groupXIII-1368	groupXIII	10375237	10375447	3.36	5.18e-06	C
ENSGACG00000010294	groupXII-1324	groupXII	12937459	12937675	2.68	4.87e-05	E
ENSGACG00000010312	groupXI-1500	groupXI	8156633	8156843	2.8	3.34e-05	C
ENSGACG00000010312	groupXI-1101	groupXI	8149154	8149370	3.08	3.83e-06	E
ENSGACG00000010327	groupXI-1500	groupXI	8156633	8156843	2.8	3.34e-05	C
ENSGACG00000010327	groupXI-1101	groupXI	8149154	8149370	3.08	3.83e-06	E
ENSGACG00000010338	groupVI-1623	groupVI	12818870	12819080	3.11	5.69e-05	C
ENSGACG00000010343	groupVI-1623	groupVI	12818870	12819080	3.11	5.69e-05	C
ENSGACG00000010343	groupVI-1914	groupVI	12821713	12821923	7.09	2.93e-08	C
ENSGACG00000010350	groupVI-1396	groupVI	12865242	12865458	2.57	6.24e-05	E
ENSGACG00000010363	groupVI-1396	groupVI	12865242	12865458	2.57	6.24e-05	E
ENSGACG00000010366	groupXII-982	groupXII	13041796	13042006	5.67	9.93e-13	C
ENSGACG00000010370	groupXII-982	groupXII	13041796	13042006	5.67	9.93e-13	C
ENSGACG00000010416	groupXV-689	groupXV	9047111	9047321	3.51	6.06e-10	C
ENSGACG00000010416	groupXV-881	groupXV	9046654	9046864	2.44	8.21e-05	C
ENSGACG00000010437	groupXV-689	groupXV	9047111	9047321	3.51	6.06e-10	C
ENSGACG00000010437	groupXV-881	groupXV	9046654	9046864	2.44	8.21e-05	C
ENSGACG00000010452	groupXVII-133	groupXVII	10708153	10708363	2.15	2.11e-08	C
ENSGACG00000010466	groupXX-700	groupXX	11932557	11932767	2.86	1.55e-07	C
ENSGACG00000010472	groupXIII-446	groupXIII	11400759	11400975	2.25	6.34e-07	E
ENSGACG00000010476	groupXVIII-341	groupXVIII	10340934	10341144	2.45	2.21e-08	C
ENSGACG00000010493	scaffold_185-4	scaffold_185	46405	46615	4.85	5.16e-08	C
ENSGACG00000010493	scaffold_185-1	scaffold_185	117790	118000	4.48	2.9e-18	C
ENSGACG00000010496	groupXIX-417	groupXIX	12037763	12037979	2.19	2e-05	E
ENSGACG00000010499	scaffold_185-1	scaffold_185	117790	118000	4.48	2.9e-18	C
ENSGACG00000010499	scaffold_185-4	scaffold_185	46405	46615	4.85	5.16e-08	C
ENSGACG00000010501	scaffold_185-1	scaffold_185	117790	118000	4.48	2.9e-18	C
ENSGACG00000010501	scaffold_185-2	scaffold_185	138694	138904	5.23	1.32e-16	C
ENSGACG00000010501	scaffold_185-4	scaffold_185	46405	46615	4.85	5.16e-08	C
ENSGACG00000010560	groupVIII-451	groupVIII	13360186	13360396	2.44	1.13e-07	C
ENSGACG00000010584	groupXIII-2358	groupXIII	11553762	11553972	6.35	1.36e-06	C
ENSGACG00000010586	groupXV-590	groupXV	9569072	9569288	2.04	5.6e-05	E
ENSGACG00000010593	groupVIII-935	groupVIII	13375264	13375474	2.43	2.26e-05	C
ENSGACG00000010594	groupXVIII-890	groupXVIII	10516532	10516742	3.98	1.01e-07	C
ENSGACG00000010618	groupVI-910	groupVI	13344458	13344668	2.43	2.26e-05	C
ENSGACG00000010618	groupVI-1145	groupVI	13337474	13337684	5.6	3.46e-10	C
ENSGACG00000010639	groupXX-872	groupXX	12156660	12156876	2.9	2.71e-06	E
ENSGACG00000010641	groupXX-872	groupXX	12156660	12156876	2.9	2.71e-06	E
ENSGACG00000010642	groupXIX-418	groupXIX	12158805	12159021	2.19	2e-05	E
ENSGACG00000010658	groupVIII-1279	groupVIII	13440578	13440788	4.93	8.07e-10	C
ENSGACG00000010666	groupVIII-1279	groupVIII	13440578	13440788	4.93	8.07e-10	C
ENSGACG00000010674	groupXIII-736	groupXIII	11749051	11749261	2.8	4.45e-07	C
ENSGACG00000010731	groupXV-535	groupXV	9806385	9806595	2.01	1.57e-05	C
ENSGACG00000010731	groupXV-565	groupXV	9807353	9807563	2.07	1.13e-05	C
ENSGACG00000010738	groupVI-1626	groupVI	13457286	13457496	17.17	1.09e-15	C
ENSGACG00000010748	scaffold_133-19	scaffold_133	195874	196084	7.09	2.93e-08	C
ENSGACG00000010752	groupXII-341	groupXII	13668800	13669010	2.11	1.5e-07	C
ENSGACG00000010755	groupXV-535	groupXV	9806385	9806595	2.01	1.57e-05	C
ENSGACG00000010755	groupXV-565	groupXV	9807353	9807563	2.07	1.13e-05	C
ENSGACG00000010764	groupVI-1626	groupVI	13457286	13457496	17.17	1.09e-15	C
ENSGACG00000010773	groupXVIII-1112	groupXVIII	10733435	10733645	2.71	9.4e-05	C
ENSGACG00000010774	groupXVIII-1112	groupXVIII	10733435	10733645	2.71	9.4e-05	C
ENSGACG00000010788	groupXII-1062	groupXII	13701377	13701587	3.73	3.91e-07	C
ENSGACG00000010793	groupI-810	groupI	11480151	11480367	2.06	1.52e-05	E
ENSGACG00000010796	groupXIII-737	groupXIII	11924536	11924752	2.19	7.54e-05	E
ENSGACG00000010800	groupXII-1062	groupXII	13701377	13701587	3.73	3.91e-07	C
ENSGACG00000010801	groupVI-279	groupVI	13726627	13726837	2.21	1.02e-07	C
ENSGACG00000010801	groupVI-666	groupVI	13727186	13727396	3.05	6.56e-08	C
ENSGACG00000010803	groupXVII-661	groupXVII	10964907	10965117	3.15	3.05e-07	C
ENSGACG00000010815	groupXVII-661	groupXVII	10964907	10965117	3.15	3.05e-07	C
ENSGACG00000010823	groupXIX-281	groupXIX	12793779	12793995	2.11	7.09e-06	E
ENSGACG00000010835	groupXV-784	groupXV	9863534	9863750	2.12	2.42e-05	E
ENSGACG00000010864	groupXVII-335	groupXVII	11030297	11030507	2.94	9.61e-10	C
ENSGACG00000010869	groupXVIII-1114	groupXVIII	10882929	10883139	2.8	3.34e-05	C
ENSGACG00000010880	groupXVII-323	groupXVII	11056947	11057157	2.75	3.37e-10	C
ENSGACG00000010984	groupI-1033	groupI	12109351	12109561	2.19	9.03e-05	C
ENSGACG00000011002	groupI-1033	groupI	12109351	12109561	2.19	9.03e-05	C
ENSGACG00000011048	groupXV-799	groupXV	10351213	10351423	5.6	1.65e-14	C
ENSGACG00000011051	groupVI-861	groupVI	14167877	14168087	3.27	3.55e-07	C
ENSGACG00000011052	groupXV-665	groupXV	10429734	10429944	3.26	6.51e-09	C
ENSGACG00000011055	groupXV-665	groupXV	10429734	10429944	3.26	6.51e-09	C
ENSGACG00000011058	groupVI-861	groupVI	14167877	14168087	3.27	3.55e-07	C
ENSGACG00000011092	groupVI-694	groupVI	14299844	14300054	2.71	4.68e-06	C
ENSGACG00000011099	groupVI-631	groupVI	14318868	14319078	3.55	2.93e-08	C
ENSGACG00000011099	groupVI-694	groupVI	14299844	14300054	2.71	4.68e-06	C
ENSGACG00000011110	groupVI-631	groupVI	14318868	14319078	3.55	2.93e-08	C
ENSGACG00000011111	groupXIII-843	groupXIII	12328278	12328488	2.3	8.94e-05	C
ENSGACG00000011118	groupI-1230	groupI	12223756	12223972	2.49	3.64e-05	E
ENSGACG00000011119	groupI-1230	groupI	12223756	12223972	2.49	3.64e-05	E
ENSGACG00000011136	groupXVIII-855	groupXVIII	11348356	11348566	12.32	3.98e-18	C
ENSGACG00000011143	groupXVII-439	groupXVII	11742587	11742803	2.62	3.55e-08	E
ENSGACG00000011155	groupXII-2037	groupXII	14764621	14764831	5.47	1.24e-07	C
ENSGACG00000011191	groupVI-1021	groupVI	14369950	14370160	2.58	1.26e-05	C
ENSGACG00000011223	groupI-1439	groupI	12341873	12342083	2.55	8.87e-06	C
ENSGACG00000011223	groupI-1529	groupI	12342753	12342963	3.86	1.01e-07	C
ENSGACG00000011223	groupI-2900	groupI	12343449	12343659	14.18	4.52e-12	C
ENSGACG00000011251	groupI-1439	groupI	12341873	12342083	2.55	8.87e-06	C
ENSGACG00000011251	groupI-1529	groupI	12342753	12342963	3.86	1.01e-07	C
ENSGACG00000011251	groupI-2900	groupI	12343449	12343659	14.18	4.52e-12	C
ENSGACG00000011262	groupXIX-338	groupXIX	13682347	13682563	2.51	5.6e-08	E
ENSGACG00000011262	groupXIX-396	groupXIX	13688238	13688454	2.06	2.82e-05	E
ENSGACG00000011271	groupXV-801	groupXV	10729025	10729235	2.24	8.94e-05	C
ENSGACG00000011271	groupXV-1491	groupXV	10720463	10720673	3.43	1.99e-05	C
ENSGACG00000011294	groupVIII-2145	groupVIII	14352908	14353118	17.17	1.09e-15	C
ENSGACG00000011311	groupXIX-204	groupXIX	13771137	13771347	2.36	1.22e-08	C
ENSGACG00000011340	groupXIX-733	groupXIX	13788517	13788727	3.95	7.31e-09	C
ENSGACG00000011348	groupXIX-733	groupXIX	13788517	13788727	3.95	7.31e-09	C
ENSGACG00000011349	groupXII-1459	groupXII	15157654	15157864	4.48	1.82e-08	C
ENSGACG00000011349	groupXII-1898	groupXII	15159025	15159235	4.48	1.13e-06	C
ENSGACG00000011376	groupXVII-1035	groupXVII	12305656	12305872	2.9	2.71e-06	E
ENSGACG00000011409	groupVI-606	groupVI	15199344	15199554	2.43	2.26e-05	C
ENSGACG00000011430	groupXIX-986	groupXIX	14087702	14087912	3.73	5.42e-06	C
ENSGACG00000011459	groupXIX-1360	groupXIX	14290669	14290879	3.28	6.9e-05	C
ENSGACG00000011459	groupXIX-619	groupXIX	14290065	14290281	2.36	2.47e-05	E
ENSGACG00000011477	groupXII-1028	groupXII	15261408	15261618	2.65	6.68e-05	C
ENSGACG00000011494	groupXIII-845	groupXIII	12979978	12980188	2.65	4.68e-06	C
ENSGACG00000011497	groupXVII-410	groupXVII	12557106	12557316	2.32	2.3e-06	C
ENSGACG00000011510	groupXIII-845	groupXIII	12979978	12980188	2.65	4.68e-06	C
ENSGACG00000011511	groupXV-2173	groupXV	11188900	11189110	6.72	2.07e-07	C
ENSGACG00000011518	groupXVII-410	groupXVII	12557106	12557316	2.32	2.3e-06	C
ENSGACG00000011576	groupXV-1712	groupXV	11283848	11284058	3.73	5.42e-06	C
ENSGACG00000011577	groupXV-1712	groupXV	11283848	11284058	3.73	5.42e-06	C
ENSGACG00000011604	groupVIII-899	groupVIII	14994023	14994233	3.07	9.64e-07	C
ENSGACG00000011619	groupVI-217	groupVI	15503327	15503537	2.15	4.94e-07	C
ENSGACG00000011630	groupXII-1307	groupXII	15382071	15382281	2.9	2.94e-06	C
ENSGACG00000011642	groupXII-1307	groupXII	15382071	15382281	2.9	2.94e-06	C
ENSGACG00000011667	groupXV-1856	groupXV	11450226	11450436	3.55	7.63e-05	C
ENSGACG00000011683	groupXV-1856	groupXV	11450226	11450436	3.55	7.63e-05	C
ENSGACG00000011688	groupXIX-918	groupXIX	14909763	14909973	7.47	1.6e-12	C
ENSGACG00000011693	groupXIX-918	groupXIX	14909763	14909973	7.47	1.6e-12	C
ENSGACG00000011693	groupXIX-653	groupXIX	14930059	14930275	2.21	3.68e-05	E
ENSGACG00000011704	groupXV-335	groupXV	11482869	11483079	2.45	2.21e-08	C
ENSGACG00000011727	groupI-435	groupI	13935382	13935592	3.53	2.13e-14	C
ENSGACG00000011727	groupI-2919	groupI	13909496	13909706	6.72	2.07e-07	C
ENSGACG00000011755	groupI-435	groupI	13935382	13935592	3.53	2.13e-14	C
ENSGACG00000011762	groupXI-487	groupXI	10807890	10808100	2.63	2.53e-09	C
ENSGACG00000011802	groupXII-1336	groupXII	15558321	15558537	2.29	5.96e-05	E
ENSGACG00000011827	groupXII-2211	groupXII	15599472	15599682	5.97	2.16e-08	C
ENSGACG00000011828	groupXII-2211	groupXII	15599472	15599682	5.97	2.16e-08	C
ENSGACG00000011843	groupVI-949	groupVI	16047644	16047860	2.23	6.75e-05	E
ENSGACG00000011861	groupI-2666	groupI	14201525	14201735	3.28	6.9e-05	C
ENSGACG00000011861	groupI-1235	groupI	14204446	14204662	2.68	1.13e-06	E
ENSGACG00000011892	groupXVII-1245	groupXVII	14115810	14116020	3.48	5.18e-06	C
ENSGACG00000011908	groupI-2666	groupI	14201525	14201735	3.28	6.9e-05	C
ENSGACG00000011908	groupI-1235	groupI	14204446	14204662	2.68	1.13e-06	E
ENSGACG00000011940	groupXVII-449	groupXVII	14240094	14240304	2.67	2.42e-07	C
ENSGACG00000011949	groupXII-857	groupXII	15700434	15700650	2.39	7.38e-07	E
ENSGACG00000011962	groupXVII-449	groupXVII	14240094	14240304	2.67	2.42e-07	C
ENSGACG00000011964	groupXVII-449	groupXVII	14240094	14240304	2.67	2.42e-07	C
ENSGACG00000011967	groupXII-857	groupXII	15700434	15700650	2.39	7.38e-07	E
ENSGACG00000011981	groupVI-504	groupVI	16421559	16421769	2.99	2e-07	C
ENSGACG00000011988	groupVI-504	groupVI	16421559	16421769	2.99	2e-07	C
ENSGACG00000011997	groupXVIII-1274	groupXVIII	12840383	12840593	4.85	5.16e-08	C
ENSGACG00000012004	groupXVIII-1274	groupXVIII	12840383	12840593	4.85	5.16e-08	C
ENSGACG00000012035	groupXI-1344	groupXI	10951386	10951596	2.8	3.34e-05	C
ENSGACG00000012035	groupXI-1854	groupXI	10951783	10951993	3.23	1.76e-05	C
ENSGACG00000012038	groupXX-1158	groupXX	13080865	13081081	2.8	1.7e-05	E
ENSGACG00000012041	groupXV-1038	groupXV	11908699	11908915	2.68	1.13e-06	E
ENSGACG00000012061	groupXII-2425	groupXII	15842975	15843185	15.68	3e-13	C
ENSGACG00000012065	groupXVIII-822	groupXVIII	13123239	13123449	3.36	3.55e-07	C
ENSGACG00000012078	groupXI-488	groupXI	11021183	11021399	2.22	2.64e-06	E
ENSGACG00000012081	groupXII-2425	groupXII	15842975	15843185	15.68	3e-13	C
ENSGACG00000012091	groupXII-814	groupXII	15876207	15876423	2.33	1.79e-06	E
ENSGACG00000012096	groupXI-526	groupXI	11212350	11212566	2.12	3.54e-06	E
ENSGACG00000012103	groupXI-526	groupXI	11212350	11212566	2.12	3.54e-06	E
ENSGACG00000012107	groupVI-1313	groupVI	16544234	16544444	8.96	5.61e-11	C
ENSGACG00000012181	groupXIII-354	groupXIII	14048256	14048466	2.03	6.95e-06	C
ENSGACG00000012194	groupXIII-354	groupXIII	14048256	14048466	2.03	6.95e-06	C
ENSGACG00000012219	groupXI-682	groupXI	11324889	11325105	3.48	7.66e-11	E
ENSGACG00000012237	groupXII-913	groupXII	16068943	16069153	3.92	5.37e-10	C
ENSGACG00000012267	groupXVII-736	groupXVII	14581042	14581252	2.58	1.26e-05	C
ENSGACG00000012267	groupXVII-967	groupXVII	14580219	14580429	2.69	1.77e-05	C
ENSGACG00000012303	groupXVIII-151	groupXVIII	13596169	13596379	2.99	6.56e-15	C
ENSGACG00000012304	groupXI-840	groupXI	11442882	11443092	2.3	8.94e-05	C
ENSGACG00000012319	groupXI-840	groupXI	11442882	11443092	2.3	8.94e-05	C
ENSGACG00000012340	groupXX-264	groupXX	13503087	13503297	3.73	1.22e-16	C
ENSGACG00000012340	groupXX-483	groupXX	13501607	13501817	2.77	8.79e-08	C
ENSGACG00000012351	groupXX-1261	groupXX	13542923	13543133	3.88	1.4e-06	C
ENSGACG00000012356	groupXX-1261	groupXX	13542923	13543133	3.88	1.4e-06	C
ENSGACG00000012364	groupVIII-885	groupVIII	15674586	15674802	2.97	2.04e-07	E
ENSGACG00000012366	groupXX-1262	groupXX	13604371	13604581	3.23	1.76e-05	C
ENSGACG00000012379	groupXX-1262	groupXX	13604371	13604581	3.23	1.76e-05	C
ENSGACG00000012382	groupI-2680	groupI	15816143	15816353	3.73	7.63e-05	C
ENSGACG00000012394	groupVIII-885	groupVIII	15674586	15674802	2.97	2.04e-07	E
ENSGACG00000012421	groupVIII-828	groupVIII	15735597	15735807	4.05	1.81e-09	C
ENSGACG00000012424	groupXV-723	groupXV	12399163	12399373	4.39	1.69e-12	C
ENSGACG00000012442	groupVIII-828	groupVIII	15735597	15735807	4.05	1.81e-09	C
ENSGACG00000012442	groupVIII-1205	groupVIII	15753890	15754100	2.89	1.14e-05	C
ENSGACG00000012469	groupXIII-1217	groupXIII	14544276	14544492	2.34	5.16e-05	E
ENSGACG00000012479	groupXIII-1217	groupXIII	14544276	14544492	2.34	5.16e-05	E
ENSGACG00000012509	groupVIII-513	groupVIII	15866242	15866458	2.01	5.93e-05	E
ENSGACG00000012541	groupXIX-784	groupXIX	15969670	15969880	2.74	2.45e-05	C
ENSGACG00000012555	groupXIX-784	groupXIX	15969670	15969880	2.74	2.45e-05	C
ENSGACG00000012567	groupXI-757	groupXI	11870529	11870745	3.27	4.62e-10	E
ENSGACG00000012578	groupXX-252	groupXX	14104393	14104603	2.65	6.86e-10	C
ENSGACG00000012580	groupXIX-869	groupXIX	16055397	16055607	2.89	1.14e-05	C
ENSGACG00000012580	groupXIX-921	groupXIX	16054893	16055103	2.71	9.4e-05	C
ENSGACG00000012593	groupXI-421	groupXI	11932753	11932963	2.21	1.1e-06	C
ENSGACG00000012605	groupI-404	groupI	16139151	16139361	3.06	1.38e-13	C
ENSGACG00000012634	groupI-1857	groupI	16329535	16329745	5.41	1.92e-09	C
ENSGACG00000012646	groupI-474	groupI	16374481	16374691	2.15	1.1e-06	C
ENSGACG00000012662	groupXII-636	groupXII	16675784	16675994	2.49	1.61e-07	C
ENSGACG00000012684	groupI-474	groupI	16374481	16374691	2.15	1.1e-06	C
ENSGACG00000012709	scaffold_151-35	scaffold_151	109705	109915	4.11	4.89e-06	C
ENSGACG00000012712	scaffold_151-35	scaffold_151	109705	109915	4.11	4.89e-06	C
ENSGACG00000012728	groupXVIII-601	groupXVIII	14445458	14445674	2.97	2.04e-07	E
ENSGACG00000012741	groupXI-747	groupXI	12285754	12285964	2.58	2.4e-06	C
ENSGACG00000012756	groupI-1111	groupI	16540481	16540691	2.91	7.64e-07	C
ENSGACG00000012757	groupXI-747	groupXI	12285754	12285964	2.58	2.4e-06	C
ENSGACG00000012798	groupI-295	groupI	16574274	16574484	2.47	2.41e-10	C
ENSGACG00000012811	scaffold_126-15	scaffold_126	182400	182610	2.85	5.9e-07	C
ENSGACG00000012819	groupXV-806	groupXV	13359781	13359991	2.53	6.21e-06	C
ENSGACG00000012821	groupI-295	groupI	16574274	16574484	2.47	2.41e-10	C
ENSGACG00000012859	groupIII-674	groupIII	313417	313627	2.61	6.49e-07	C
ENSGACG00000012909	groupI-1261	groupI	16608413	16608623	2.84	2.25e-06	C
ENSGACG00000012940	groupI-1547	groupI	16694340	16694550	10.45	6.44e-14	C
ENSGACG00000012966	groupI-1547	groupI	16694340	16694550	10.45	6.44e-14	C
ENSGACG00000012972	groupIII-314	groupIII	469141	469351	3.07	1.93e-12	C
ENSGACG00000012991	groupIII-314	groupIII	469141	469351	3.07	1.93e-12	C
ENSGACG00000012995	groupVIII-416	groupVIII	16660398	16660614	2.68	1.21e-07	E
ENSGACG00000013018	groupXII-729	groupXII	17607600	17607816	2.83	3.18e-08	E
ENSGACG00000013043	groupXIII-2188	groupXIII	15660695	15660905	4.11	4.89e-06	C
ENSGACG00000013057	groupXIII-484	groupXIII	15685277	15685487	3.09	1.02e-10	C
ENSGACG00000013057	groupXIII-2188	groupXIII	15660695	15660905	4.11	4.89e-06	C
ENSGACG00000013061	groupXIII-484	groupXIII	15685277	15685487	3.09	1.02e-10	C
ENSGACG00000013067	groupXV-1338	groupXV	14904360	14904570	4.33	8.11e-08	C
ENSGACG00000013073	groupXII-1044	groupXII	17651270	17651486	2.28	1.58e-05	E
ENSGACG00000013078	groupXV-1338	groupXV	14904360	14904570	4.33	8.11e-08	C
ENSGACG00000013084	groupXX-762	groupXX	15471491	15471701	2.99	2.94e-06	C
ENSGACG00000013105	groupIII-521	groupIII	661079	661295	2.01	5.93e-05	E
ENSGACG00000010487	groupXIII-2128	groupXIII	11442814	11443024	3.92	1.99e-05	C
ENSGACG00000010487	groupXIII-446	groupXIII	11400759	11400975	2.25	6.34e-07	E
ENSGACG00000017451	groupIII-92	groupIII	14105328	14105544	2.15	4.58e-10	E
ENSGACG00000013151	groupVIII-1832	groupVIII	17109805	17110015	3.92	1.99e-05	C
ENSGACG00000013158	groupXV-969	groupXV	15560395	15560605	4.48	1.34e-09	C
ENSGACG00000013166	groupXV-969	groupXV	15560395	15560605	4.48	1.34e-09	C
ENSGACG00000013223	groupXV-891	groupXV	15683266	15683476	3.36	7.37e-09	C
ENSGACG00000013223	groupXV-2206	groupXV	15673953	15674163	3.28	6.9e-05	C
ENSGACG00000013226	groupI-1549	groupI	17107541	17107751	2.71	9.4e-05	C
ENSGACG00000013230	groupXX-213	groupXX	16000600	16000810	2.19	3.14e-08	C
ENSGACG00000013232	groupVIII-203	groupVIII	17170198	17170408	3.17	1.39e-14	C
ENSGACG00000013232	groupVIII-1083	groupVIII	17174746	17174956	5.41	1.92e-09	C
ENSGACG00000013237	groupXX-213	groupXX	16000600	16000810	2.19	3.14e-08	C
ENSGACG00000013251	groupIII-1768	groupIII	1007143	1007353	5.97	2.16e-08	C
ENSGACG00000013267	groupXV-410	groupXV	15965547	15965763	2.08	7.66e-06	E
ENSGACG00000013273	groupXIII-777	groupXIII	16131956	16132166	2.99	2e-07	C
ENSGACG00000013274	groupXV-410	groupXV	15965547	15965763	2.08	7.66e-06	E
ENSGACG00000013297	groupVIII-1565	groupVIII	17247017	17247227	2.71	9.4e-05	C
ENSGACG00000013298	groupXI-550	groupXI	12854552	12854762	2.08	7.52e-06	C
ENSGACG00000013298	groupXI-679	groupXI	12850973	12851183	2.24	5.34e-06	C
ENSGACG00000013307	groupXVIII-360	groupXVIII	15526902	15527118	2.33	2.36e-07	E
ENSGACG00000013320	groupVIII-1565	groupVIII	17247017	17247227	2.71	9.4e-05	C
ENSGACG00000013327	groupXX-1352	groupXX	16120639	16120849	5.6	3.46e-10	C
ENSGACG00000013330	groupXX-1352	groupXX	16120639	16120849	5.6	3.46e-10	C
ENSGACG00000013333	groupXIX-356	groupXIX	17565107	17565317	2.12	2.67e-05	C
ENSGACG00000013333	groupXIX-746	groupXIX	17591969	17592179	10.82	6.11e-15	C
ENSGACG00000013333	groupXIX-1390	groupXIX	17591509	17591719	3.58	1.99e-05	C
ENSGACG00000013345	groupXIX-746	groupXIX	17591969	17592179	10.82	6.11e-15	C
ENSGACG00000013345	groupXIX-1390	groupXIX	17591509	17591719	3.58	1.99e-05	C
ENSGACG00000007309	groupVIII-2090	groupVIII	8352304	8352514	3.55	7.63e-05	C
ENSGACG00000013381	groupXX-1353	groupXX	16161564	16161774	3.36	5.18e-06	C
ENSGACG00000013402	groupXX-2291	groupXX	16248404	16248614	4.48	1.61e-05	C
ENSGACG00000005232	groupXVI-1698	groupXVI	10474974	10475184	3.28	6.9e-05	C
ENSGACG00000013435	scaffold_196-7	scaffold_196	22763	22973	8.21	4.8e-10	C
ENSGACG00000013440	scaffold_196-7	scaffold_196	22763	22973	8.21	4.8e-10	C
ENSGACG00000013448	groupXIII-2013	groupXIII	16428795	16429005	3.58	1.99e-05	C
ENSGACG00000005323	groupV-1204	groupV	6582973	6583183	5.23	6.7e-07	C
ENSGACG00000013469	groupXIII-2013	groupXIII	16428795	16429005	3.58	1.99e-05	C
ENSGACG00000013503	scaffold_200-3	scaffold_200	42974	43184	2.28	7.91e-06	C
ENSGACG00000013511	groupXX-274	groupXX	16312014	16312224	2.03	6.95e-06	C
ENSGACG00000013512	scaffold_200-3	scaffold_200	42974	43184	2.28	7.91e-06	C
ENSGACG00000013535	groupVIII-866	groupVIII	17454037	17454247	2.38	8.21e-05	C
ENSGACG00000013537	groupVIII-866	groupVIII	17454037	17454247	2.38	8.21e-05	C
ENSGACG00000013663	groupI-775	groupI	19630278	19630488	6.72	1.06e-16	C
ENSGACG00000013663	groupI-926	groupI	19628818	19629028	2.78	1.69e-06	C
ENSGACG00000013667	groupI-775	groupI	19630278	19630488	6.72	1.06e-16	C
ENSGACG00000013667	groupI-926	groupI	19628818	19629028	2.78	1.69e-06	C
ENSGACG00000013676	groupXX-1543	groupXX	16968489	16968699	3.23	1.76e-05	C
ENSGACG00000013678	groupXX-1543	groupXX	16968489	16968699	3.23	1.76e-05	C
ENSGACG00000013682	groupI-1038	groupI	19656157	19656367	2.45	4.32e-06	C
ENSGACG00000003307	groupVIII-300	groupVIII	1309807	1310023	2.22	2.64e-06	E
ENSGACG00000015450	groupII-1129	groupII	8555214	8555424	4.78	3.91e-09	C
ENSGACG00000007609	groupXVII-440	groupXVII	6678585	6678795	4.31	5.59e-13	C
ENSGACG00000007609	groupXVII-473	groupXVII	6677859	6678069	2.02	5.32e-05	C
ENSGACG00000007609	groupXVII-692	groupXVII	6677266	6677476	3.98	1.01e-07	C
ENSGACG00000013708	groupIII-997	groupIII	1681952	1682162	2.44	8.21e-05	C
ENSGACG00000013714	groupXIX-454	groupXIX	18807556	18807766	2.14	9.03e-05	C
ENSGACG00000013721	groupIII-997	groupIII	1681952	1682162	2.44	8.21e-05	C
ENSGACG00000013743	groupIII-675	groupIII	1916237	1916447	2.85	5.9e-07	C
ENSGACG00000013743	groupIII-1528	groupIII	1904235	1904445	4.11	4.89e-06	C
ENSGACG00000013743	groupIII-1637	groupIII	1912219	1912429	3.11	5.69e-05	C
ENSGACG00000013801	groupXIX-336	groupXIX	19449743	19449953	2.16	5.43e-06	C
ENSGACG00000013801	groupXIX-841	groupXIX	19453026	19453236	2.65	6.68e-05	C
ENSGACG00000017100	groupII-1020	groupII	20337868	20338084	2.9	2.71e-06	E
ENSGACG00000013823	groupXIII-2436	groupXIII	17379470	17379680	3.28	6.9e-05	C
ENSGACG00000013832	groupIII-1638	groupIII	2119066	2119276	4.48	1.13e-06	C
ENSGACG00000010509	groupXIX-417	groupXIX	12037763	12037979	2.19	2e-05	E
ENSGACG00000013859	groupXX-1360	groupXX	17700363	17700573	3.2	4.53e-06	C
ENSGACG00000013923	groupI-865	groupI	20457374	20457590	2.13	4.48e-05	E
ENSGACG00000013930	groupXI-659	groupXI	13672402	13672618	2.55	1.98e-07	E
ENSGACG00000013940	groupIII-1139	groupIII	2298964	2299174	3.61	1.46e-06	C
ENSGACG00000013942	groupIII-724	groupIII	2318007	2318217	3.05	1.72e-08	C
ENSGACG00000013942	groupIII-1139	groupIII	2298964	2299174	3.61	1.46e-06	C
ENSGACG00000013942	groupIII-950	groupIII	2343203	2343419	2.77	8.48e-07	E
ENSGACG00000013943	groupIII-950	groupIII	2343203	2343419	2.77	8.48e-07	E
ENSGACG00000013944	groupIII-1206	groupIII	2403648	2403858	3.84	2.85e-08	C
ENSGACG00000013972	groupXIX-663	groupXIX	19811021	19811231	2.99	1.14e-05	C
ENSGACG00000013981	groupXIX-699	groupXIX	19834047	19834257	2.36	5.58e-05	C
ENSGACG00000013990	groupVIII-1296	groupVIII	18189694	18189904	20.16	1.59e-19	C
ENSGACG00000014000	groupXX-323	groupXX	17937426	17937636	3.12	2.3e-12	C
ENSGACG00000014009	groupXX-323	groupXX	17937426	17937636	3.12	2.3e-12	C
ENSGACG00000014070	groupXIII-470	groupXIII	18023077	18023287	2.03	3.54e-05	C
ENSGACG00000014070	groupXIII-1873	groupXIII	18052251	18052461	3.23	1.76e-05	C
ENSGACG00000014097	groupVIII-2192	groupVIII	18350180	18350390	3.92	1.99e-05	C
ENSGACG00000014181	groupXIII-1745	groupXIII	18264173	18264383	3.11	5.69e-05	C
ENSGACG00000014194	groupXX-1282	groupXX	18914373	18914589	3.35	4.84e-06	E
ENSGACG00000014195	groupXI-595	groupXI	14548058	14548274	2.68	2.74e-08	E
ENSGACG00000014208	groupXI-848	groupXI	14625827	14626037	4.23	5.59e-13	C
ENSGACG00000014266	groupXIII-2217	groupXIII	18482974	18483184	3.55	7.63e-05	C
ENSGACG00000013702	groupVIII-562	groupVIII	17740497	17740707	2.07	5.75e-05	C
ENSGACG00000009257	groupI-2618	groupI	8888493	8888703	3.11	5.69e-05	C
ENSGACG00000014281	groupII-783	groupII	2419628	2419838	2.65	4.68e-06	C
ENSGACG00000014288	groupXI-2314	groupXI	14746161	14746371	3.55	7.63e-05	C
ENSGACG00000014299	groupI-896	groupI	21631873	21632083	2.35	3.79e-05	C
ENSGACG00000014303	groupIII-671	groupIII	3561159	3561375	2.14	8.31e-05	E
ENSGACG00000002426	groupXXI-339	groupXXI	5127680	5127890	5.47	9.15e-14	C
ENSGACG00000014312	groupXIII-1098	groupXIII	18788212	18788422	2.99	1.14e-05	C
ENSGACG00000014315	groupXIII-1098	groupXIII	18788212	18788422	2.99	1.14e-05	C
ENSGACG00000014318	groupXIII-590	groupXIII	18809713	18809923	3.43	2.14e-09	C
ENSGACG00000014318	groupXIII-1043	groupXIII	18808555	18808765	2.58	1.26e-05	C
ENSGACG00000014318	groupXIII-1876	groupXIII	18822295	18822505	4.48	1.13e-06	C
ENSGACG00000014318	groupXIII-1033	groupXIII	18832782	18832998	4.19	5.38e-09	E
ENSGACG00000014340	groupVIII-2199	groupVIII	18840978	18841188	3.55	7.63e-05	C
ENSGACG00000014343	groupVIII-2199	groupVIII	18840978	18841188	3.55	7.63e-05	C
ENSGACG00000014348	groupIII-956	groupIII	3918045	3918261	2.68	2.28e-05	E
ENSGACG00000014352	groupIII-956	groupIII	3918045	3918261	2.68	2.28e-05	E
ENSGACG00000014363	groupXIII-1627	groupXIII	18913391	18913601	4.11	4.89e-06	C
ENSGACG00000014381	groupIII-1656	groupIII	4041606	4041816	4.67	2.48e-07	C
ENSGACG00000014398	groupIII-1656	groupIII	4041606	4041816	4.67	2.48e-07	C
ENSGACG00000014400	groupII-226	groupII	3470531	3470741	2.69	3.72e-11	C
ENSGACG00000014405	groupXIII-1627	groupXIII	18913391	18913601	4.11	4.89e-06	C
ENSGACG00000014409	scaffold_112-16	scaffold_112	185884	186094	2.59	4.63e-07	C
ENSGACG00000014419	groupI-503	groupI	22016767	22016977	2.28	1.56e-06	C
ENSGACG00000014424	groupI-503	groupI	22016767	22016977	2.28	1.56e-06	C
ENSGACG00000014424	groupI-1876	groupI	22035934	22036144	4.48	1.82e-08	C
ENSGACG00000014425	scaffold_112-16	scaffold_112	185884	186094	2.59	4.63e-07	C
ENSGACG00000014429	groupI-1767	groupI	22063448	22063658	2.57	6.68e-05	C
ENSGACG00000014458	scaffold_112-12	scaffold_112	304185	304395	2.17	3.64e-06	C
ENSGACG00000014461	scaffold_112-12	scaffold_112	304185	304395	2.17	3.64e-06	C
ENSGACG00000014478	groupIII-844	groupIII	4873131	4873347	2.9	2.71e-06	E
ENSGACG00000014489	groupII-622	groupII	3550499	3550709	2.14	9.03e-05	C
ENSGACG00000014489	groupII-814	groupII	3543944	3544154	2.55	8.87e-06	C
ENSGACG00000014495	groupII-622	groupII	3550499	3550709	2.14	9.03e-05	C
ENSGACG00000014532	groupXI-951	groupXI	15573013	15573223	4.27	4.32e-10	C
ENSGACG00000014532	groupXI-985	groupXI	15574436	15574646	4.27	4.32e-10	C
ENSGACG00000014533	groupIII-1948	groupIII	4992601	4992811	4.11	4.89e-06	C
ENSGACG00000014536	groupIII-1948	groupIII	4992601	4992811	4.11	4.89e-06	C
ENSGACG00000014579	groupIII-963	groupIII	5109760	5109970	5.97	1.7e-13	C
ENSGACG00000014591	groupXIII-786	groupXIII	19338542	19338752	5.12	4.14e-14	C
ENSGACG00000014627	groupI-1010	groupI	22405272	22405482	3.92	5.37e-10	C
ENSGACG00000014640	scaffold_76-5	scaffold_76	481687	481897	2.02	3.1e-06	C
ENSGACG00000014644	groupVIII-1093	groupVIII	19321323	19321533	2.8	3.34e-05	C
ENSGACG00000014653	groupVIII-1093	groupVIII	19321323	19321533	2.8	3.34e-05	C
ENSGACG00000014659	groupII-998	groupII	4307164	4307374	2.54	4.69e-05	C
ENSGACG00000014696	groupII-674	groupII	4429709	4429919	2.24	8.94e-05	C
ENSGACG00000014696	groupII-855	groupII	4440598	4440808	2.65	4.68e-06	C
ENSGACG00000014696	groupII-1815	groupII	4430424	4430634	7.47	2.93e-08	C
ENSGACG00000004704	groupX-1022	groupX	7137899	7138115	2.39	9.25e-05	E
ENSGACG00000014771	groupXIII-300	groupXIII	19995298	19995514	2.32	4.86e-07	E
ENSGACG00000014775	groupXIII-300	groupXIII	19995298	19995514	2.32	4.86e-07	E
ENSGACG00000014778	groupII-735	groupII	4669409	4669619	4.37	9.98e-11	C
ENSGACG00000014778	groupII-727	groupII	4725824	4726040	2.46	4.71e-06	E
ENSGACG00000014782	groupII-1993	groupII	4887412	4887622	3.73	7.63e-05	C
ENSGACG00000014813	groupXI-952	groupXI	16029110	16029320	2.84	2.25e-06	C
ENSGACG00000014838	groupI-1118	groupI	22928346	22928556	3.07	9.64e-07	C
ENSGACG00000014843	groupI-1118	groupI	22928346	22928556	3.07	9.64e-07	C
ENSGACG00000014889	groupI-1043	groupI	23149485	23149695	2.99	7.64e-07	C
ENSGACG00000014902	groupII-730	groupII	5485575	5485791	4.02	4.4e-10	E
ENSGACG00000014922	groupII-893	groupII	5618135	5618351	3.06	6.56e-08	E
ENSGACG00000015662	groupIII-1465	groupIII	8824206	8824416	4.18	3.45e-07	C
ENSGACG00000014926	groupI-1044	groupI	23341627	23341837	2.76	6.42e-06	C
ENSGACG00000014971	groupII-554	groupII	5662026	5662236	2.44	2.99e-06	C
ENSGACG00000014973	groupII-554	groupII	5662026	5662236	2.44	2.99e-06	C
ENSGACG00000014979	groupXI-1302	groupXI	16446105	16446315	2.9	2.94e-06	C
ENSGACG00000014985	groupII-1827	groupII	5704201	5704411	6.72	2.07e-07	C
ENSGACG00000014996	groupIII-423	groupIII	6615799	6616009	2.05	5.02e-06	C
ENSGACG00000014996	groupIII-1044	groupIII	6617765	6617975	2.82	8.65e-06	C
ENSGACG00000015003	groupIII-423	groupIII	6615799	6616009	2.05	5.02e-06	C
ENSGACG00000015003	groupIII-1044	groupIII	6617765	6617975	2.82	8.65e-06	C
ENSGACG00000015004	groupII-900	groupII	5754931	5755141	3.23	9.34e-08	C
ENSGACG00000019125	groupIV-984	groupIV	21831248	21831464	2.27	4.24e-06	E
ENSGACG00000009228	groupXVIII-620	groupXVIII	8830457	8830673	2.53	1.83e-06	E
ENSGACG00000015033	scaffold_74-7	scaffold_74	442237	442447	2.29	3.94e-09	C
ENSGACG00000015042	groupIII-1957	groupIII	6778679	6778889	4.73	3.4e-06	C
ENSGACG00000015058	groupI-1081	groupI	24964313	24964523	2.55	8.87e-06	C
ENSGACG00000015061	groupI-1081	groupI	24964313	24964523	2.55	8.87e-06	C
ENSGACG00000015065	groupIII-1446	groupIII	6856514	6856724	4.48	1.82e-08	C
ENSGACG00000015066	groupIII-1446	groupIII	6856514	6856724	4.48	1.82e-08	C
ENSGACG00000015071	scaffold_74-19	scaffold_74	523232	523448	2.31	2.86e-05	E
ENSGACG00000015812	scaffold_135-17	scaffold_135	172667	172883	2.95	1.2e-05	E
ENSGACG00000015119	scaffold_68-37	scaffold_68	444092	444308	2.01	5.93e-05	E
ENSGACG00000015139	groupII-2013	groupII	6190957	6191167	3.55	7.63e-05	C
ENSGACG00000015140	groupII-1068	groupII	6194970	6195180	3.52	3.89e-07	C
ENSGACG00000015163	groupIII-1098	groupIII	7053938	7054148	3.36	3.55e-07	C
ENSGACG00000015165	groupIII-1098	groupIII	7053938	7054148	3.36	3.55e-07	C
ENSGACG00000015198	groupI-1103	groupI	25977521	25977737	2.6	1.46e-06	E
ENSGACG00000015207	groupI-3330	groupI	26166803	26167013	4.48	1.61e-05	C
ENSGACG00000015210	groupI-3332	groupI	26449298	26449508	3.73	7.63e-05	C
ENSGACG00000014920	groupII-893	groupII	5618135	5618351	3.06	6.56e-08	E
ENSGACG00000015271	groupIII-1681	groupIII	7370782	7370992	3.92	1.99e-05	C
ENSGACG00000015275	groupII-500	groupII	7390932	7391148	2.04	5.6e-05	E
ENSGACG00000005581	groupX-489	groupX	8087821	8088037	2.33	1.38e-05	E
ENSGACG00000015376	groupII-625	groupII	8124044	8124254	3.51	6.06e-10	C
ENSGACG00000015376	groupII-1842	groupII	8122068	8122278	14.93	4.52e-12	C
ENSGACG00000017953	groupIII-934	groupIII	16534363	16534579	2.58	2.93e-05	E
ENSGACG00000015437	groupXIV-284	groupXIV	50812	51022	3.47	9.66e-13	C
ENSGACG00000015440	groupXIV-284	groupXIV	50812	51022	3.47	9.66e-13	C
ENSGACG00000015457	groupI-3031	groupI	27486875	27487085	3.43	1.99e-05	C
ENSGACG00000015458	groupXIV-345	groupXIV	93479	93689	2.1	7.93e-06	C
ENSGACG00000015461	groupXIV-345	groupXIV	93479	93689	2.1	7.93e-06	C
ENSGACG00000015462	groupI-3031	groupI	27486875	27487085	3.43	1.99e-05	C
ENSGACG00000015468	groupIII-1041	groupIII	8166932	8167148	2.58	1.38e-05	E
ENSGACG00000015471	groupIII-1303	groupIII	8208600	8208810	4.03	3.45e-07	C
ENSGACG00000015473	groupIII-1303	groupIII	8208600	8208810	4.03	3.45e-07	C
ENSGACG00000015499	groupII-2217	groupII	8651304	8651514	3.55	7.63e-05	C
ENSGACG00000015519	groupIII-1459	groupIII	8360785	8360995	8.58	5.61e-11	C
ENSGACG00000015520	groupIII-1459	groupIII	8360785	8360995	8.58	5.61e-11	C
ENSGACG00000015520	groupIII-818	groupIII	8376413	8376629	3.41	4.97e-08	E
ENSGACG00000015525	groupII-791	groupII	8844233	8844443	2.91	7.64e-07	C
ENSGACG00000015525	groupII-827	groupII	8849146	8849356	2.71	4.68e-06	C
ENSGACG00000015525	groupII-865	groupII	8843539	8843749	3.23	9.34e-08	C
ENSGACG00000015528	groupIII-974	groupIII	8423987	8424197	3.36	3.55e-07	C
ENSGACG00000015530	groupII-827	groupII	8849146	8849356	2.71	4.68e-06	C
ENSGACG00000015530	groupII-618	groupII	8862660	8862876	2.15	2.21e-05	E
ENSGACG00000015544	groupII-476	groupII	8919503	8919713	2.19	2.69e-05	C
ENSGACG00000015547	groupII-476	groupII	8919503	8919713	2.19	2.69e-05	C
ENSGACG00000015587	groupI-276	groupI	27829588	27829798	2.76	4.95e-12	C
ENSGACG00000015589	groupI-276	groupI	27829588	27829798	2.76	4.95e-12	C
ENSGACG00000015608	groupXIV-1231	groupXIV	403912	404122	14.18	4.52e-12	C
ENSGACG00000015634	groupIII-1465	groupIII	8824206	8824416	4.18	3.45e-07	C
ENSGACG00000012598	groupXI-421	groupXI	11932753	11932963	2.21	1.1e-06	C
ENSGACG00000015683	groupII-658	groupII	10151590	10151800	2.24	4.02e-05	C
ENSGACG00000015683	groupII-1865	groupII	10150683	10150893	7.47	2.93e-08	C
ENSGACG00000015737	groupXIV-457	groupXIV	785543	785753	6.59	3.18e-19	C
ENSGACG00000015738	scaffold_235-6	scaffold_235	59920	60136	2.41	2.7e-06	E
ENSGACG00000015747	groupII-1378	groupII	10535941	10536151	3.92	1.99e-05	C
ENSGACG00000015754	groupII-1493	groupII	10580676	10580886	3.73	3.91e-07	C
ENSGACG00000015787	scaffold_135-9	scaffold_135	74427	74637	8.06	8.55e-23	C
ENSGACG00000015787	scaffold_135-12	scaffold_135	76858	77068	10	2.18e-32	C
ENSGACG00000015788	scaffold_135-9	scaffold_135	74427	74637	8.06	8.55e-23	C
ENSGACG00000015788	scaffold_135-12	scaffold_135	76858	77068	10	2.18e-32	C
ENSGACG00000000374	scaffold_27-210	scaffold_27	656468	656678	2.09	2.54e-05	C
ENSGACG00000015824	groupXIV-578	groupXIV	1262134	1262350	2.28	1.58e-05	E
ENSGACG00000015843	groupXIV-1564	groupXIV	1460760	1460970	13.44	6.36e-11	C
ENSGACG00000015844	groupXIV-1564	groupXIV	1460760	1460970	13.44	6.36e-11	C
ENSGACG00000015898	groupXIV-730	groupXIV	1927550	1927760	2.38	8.21e-05	C
ENSGACG00000015904	groupIX-981	groupIX	178550	178766	2.79	8.01e-06	E
ENSGACG00000015913	groupXIV-618	groupXIV	2149064	2149280	2.52	3.85e-06	E
ENSGACG00000015943	groupII-919	groupII	11966474	11966684	3.08	3.73e-06	C
ENSGACG00000015958	groupII-561	groupII	12094659	12094869	4.18	1.78e-13	C
ENSGACG00000015979	groupIX-1899	groupIX	698723	698933	3.73	7.63e-05	C
ENSGACG00000015990	groupII-804	groupII	12657028	12657244	2.4	5.64e-06	E
ENSGACG00000015992	groupII-1394	groupII	12701581	12701791	3.58	1.99e-05	C
ENSGACG00000016008	groupXIV-1349	groupXIV	2742857	2743067	31.35	1.42e-17	C
ENSGACG00000016012	groupIX-596	groupIX	804608	804818	2.33	4.98e-06	C
ENSGACG00000016012	groupIX-803	groupIX	807658	807868	2.29	1.74e-05	C
ENSGACG00000016013	groupXIV-1072	groupXIV	2743941	2744151	3.11	5.69e-05	C
ENSGACG00000016013	groupXIV-1349	groupXIV	2742857	2743067	31.35	1.42e-17	C
ENSGACG00000016015	groupIX-812	groupIX	833580	833796	2.33	1.38e-05	E
ENSGACG00000016017	groupIX-812	groupIX	833580	833796	2.33	1.38e-05	E
ENSGACG00000016068	groupII-491	groupII	13397591	13397801	3.86	6.56e-14	C
ENSGACG00000016068	groupII-591	groupII	13399089	13399299	3.26	6.51e-09	C
ENSGACG00000016070	groupII-491	groupII	13397591	13397801	3.86	6.56e-14	C
ENSGACG00000016070	groupII-591	groupII	13399089	13399299	3.26	6.51e-09	C
ENSGACG00000016070	groupII-1148	groupII	13403650	13403860	3.31	1.35e-06	C
ENSGACG00000016075	groupIX-1216	groupIX	1380111	1380321	2.9	2.94e-06	C
ENSGACG00000007795	groupI-1354	groupI	6221140	6221350	2.74	2.45e-05	C
ENSGACG00000006627	groupXVI-364	groupXVI	12963229	12963445	2.33	2.36e-07	E
ENSGACG00000016116	groupIII-666	groupIII	9437034	9437244	3.88	1.16e-11	C
ENSGACG00000016116	groupIII-882	groupIII	9437692	9437902	4.6	2.96e-10	C
ENSGACG00000016122	groupIII-686	groupIII	9448147	9448357	3.05	1.72e-08	C
ENSGACG00000001939	scaffold_128-24	scaffold_128	78593	78803	3.73	7.63e-05	C
ENSGACG00000020631	groupVII-1465	groupVII	21602852	21603062	3.31	1.35e-06	C
ENSGACG00000016228	groupIII-399	groupIII	9817207	9817417	2.78	4.47e-10	C
ENSGACG00000016235	groupIII-399	groupIII	9817207	9817417	2.78	4.47e-10	C
ENSGACG00000016235	groupIII-1846	groupIII	9832768	9832978	4.48	1.13e-06	C
ENSGACG00000016253	groupII-2067	groupII	14024541	14024751	3.73	7.63e-05	C
ENSGACG00000016298	groupII-515	groupII	14551353	14551563	2.92	5.23e-08	C
ENSGACG00000016302	groupXIV-680	groupXIV	3542708	3542918	4.73	6.28e-11	C
ENSGACG00000016305	groupXIV-680	groupXIV	3542708	3542918	4.73	6.28e-11	C
ENSGACG00000016320	groupIV-499	groupIV	182004	182214	2.18	4.99e-07	C
ENSGACG00000016321	groupIV-499	groupIV	182004	182214	2.18	4.99e-07	C
ENSGACG00000005604	groupXII-1010	groupXII	6555688	6555898	3.95	7.31e-09	C
ENSGACG00000016357	groupII-577	groupII	14969705	14969915	2.37	1.42e-06	C
ENSGACG00000016365	groupII-1502	groupII	15023082	15023292	2.71	9.4e-05	C
ENSGACG00000016413	groupII-927	groupII	15242727	15242937	5.23	3.05e-11	C
ENSGACG00000016434	groupIII-400	groupIII	10416350	10416560	2.21	2.23e-07	C
ENSGACG00000016435	groupIII-400	groupIII	10416350	10416560	2.21	2.23e-07	C
ENSGACG00000016451	groupII-659	groupII	15351809	15352019	2.74	1.24e-06	C
ENSGACG00000016472	groupIV-1156	groupIV	1771429	1771645	2.26	3.27e-05	E
ENSGACG00000016474	groupIV-1845	groupIV	1795270	1795480	6.22	3.57e-09	C
ENSGACG00000016479	groupIV-1845	groupIV	1795270	1795480	6.22	3.57e-09	C
ENSGACG00000005555	groupX-489	groupX	8087821	8088037	2.33	1.38e-05	E
ENSGACG00000016537	groupXIV-386	groupXIV	4302885	4303101	2.01	1.72e-05	E
ENSGACG00000016548	groupXIV-931	groupXIV	4423515	4423731	2.68	4.87e-05	E
ENSGACG00000016580	groupIX-1356	groupIX	4565704	4565914	6.22	3.57e-09	C
ENSGACG00000016588	groupXIV-737	groupXIV	4539409	4539619	4.78	3.91e-09	C
ENSGACG00000016591	groupXIV-384	groupXIV	4558090	4558300	3.1	1.46e-09	C
ENSGACG00000016591	groupXIV-737	groupXIV	4539409	4539619	4.78	3.91e-09	C
ENSGACG00000016599	groupIII-1242	groupIII	10949604	10949814	2.71	9.4e-05	C
ENSGACG00000016602	groupIII-1242	groupIII	10949604	10949814	2.71	9.4e-05	C
ENSGACG00000016632	groupIX-816	groupIX	4769870	4770086	2.43	2.08e-05	E
ENSGACG00000016635	groupIX-816	groupIX	4769870	4770086	2.43	2.08e-05	E
ENSGACG00000016638	groupIX-778	groupIX	4806696	4806906	2.19	9.03e-05	C
ENSGACG00000016641	groupIV-717	groupIV	2718371	2718587	2.81	7.27e-09	E
ENSGACG00000016642	groupIV-717	groupIV	2718371	2718587	2.81	7.27e-09	E
ENSGACG00000016642	groupIV-718	groupIV	2765272	2765488	2.18	1.09e-05	E
ENSGACG00000016647	groupXIV-959	groupXIV	5370587	5370797	2.71	9.4e-05	C
ENSGACG00000016657	groupIX-177	groupIX	4807294	4807504	2.78	3.61e-13	C
ENSGACG00000016657	groupIX-778	groupIX	4806696	4806906	2.19	9.03e-05	C
ENSGACG00000016669	groupIX-1552	groupIX	4880393	4880603	4.18	3.45e-07	C
ENSGACG00000016675	groupIII-786	groupIII	11317361	11317577	2.19	7.54e-05	E
ENSGACG00000016677	groupIII-786	groupIII	11317361	11317577	2.19	7.54e-05	E
ENSGACG00000016687	groupIX-1552	groupIX	4880393	4880603	4.18	3.45e-07	C
ENSGACG00000016690	groupIII-617	groupIII	11488546	11488756	2.51	1.7e-06	C
ENSGACG00000016701	groupIII-617	groupIII	11488546	11488756	2.51	1.7e-06	C
ENSGACG00000016703	groupIX-1552	groupIX	4880393	4880603	4.18	3.45e-07	C
ENSGACG00000016722	groupII-599	groupII	17987118	17987328	2.53	6.21e-06	C
ENSGACG00000016722	groupII-1095	groupII	17980746	17980956	2.8	3.34e-05	C
ENSGACG00000016722	groupII-1159	groupII	17978893	17979103	2.61	1.77e-05	C
ENSGACG00000016724	groupXIV-572	groupXIV	5467544	5467754	2.19	2.69e-05	C
ENSGACG00000016727	groupII-599	groupII	17987118	17987328	2.53	6.21e-06	C
ENSGACG00000016727	groupII-1095	groupII	17980746	17980956	2.8	3.34e-05	C
ENSGACG00000016727	groupII-1159	groupII	17978893	17979103	2.61	1.77e-05	C
ENSGACG00000016739	groupXIV-832	groupXIV	5520119	5520329	3.61	1.46e-06	C
ENSGACG00000016743	groupXIV-832	groupXIV	5520119	5520329	3.61	1.46e-06	C
ENSGACG00000019629	groupVII-1345	groupVII	6806300	6806510	4.73	6.28e-11	C
ENSGACG00000016774	groupIX-663	groupIX	5217851	5218061	4.39	1.69e-12	C
ENSGACG00000016774	groupIX-1058	groupIX	5223358	5223568	2.38	8.21e-05	C
ENSGACG00000016774	groupIX-1004	groupIX	5217093	5217303	3.31	1.35e-06	C
ENSGACG00000016774	groupIX-1925	groupIX	5221672	5221882	2.88	4.44e-05	C
ENSGACG00000016775	groupIX-663	groupIX	5217851	5218061	4.39	1.69e-12	C
ENSGACG00000016775	groupIX-1058	groupIX	5223358	5223568	2.38	8.21e-05	C
ENSGACG00000016775	groupIX-1925	groupIX	5221672	5221882	2.88	4.44e-05	C
ENSGACG00000016791	groupIV-2822	groupIV	3876169	3876379	5.47	1.24e-07	C
ENSGACG00000016799	groupXIV-631	groupXIV	5854492	5854702	3.73	7.97e-09	C
ENSGACG00000016806	groupIX-917	groupIX	5342402	5342612	3.92	5.37e-10	C
ENSGACG00000016817	groupXIV-532	groupXIV	5901006	5901216	2.74	1.24e-06	C
ENSGACG00000016829	groupIV-418	groupIV	4471786	4471996	2.24	4.51e-08	C
ENSGACG00000016837	groupIX-2077	groupIX	5431786	5431996	3.43	1.99e-05	C
ENSGACG00000016847	groupIV-418	groupIV	4471786	4471996	2.24	4.51e-08	C
ENSGACG00000016850	groupIII-455	groupIII	12180106	12180316	2.04	7.52e-06	C
ENSGACG00000016865	groupIII-455	groupIII	12180106	12180316	2.04	7.52e-06	C
ENSGACG00000016878	groupII-565	groupII	18594065	18594275	2.45	4.32e-06	C
ENSGACG00000016882	groupII-565	groupII	18594065	18594275	2.45	4.32e-06	C
ENSGACG00000016888	groupIX-995	groupIX	5858204	5858420	2.49	3.64e-05	E
ENSGACG00000016915	groupIV-538	groupIV	5045301	5045511	2.01	4.64e-06	C
ENSGACG00000016918	groupIII-1876	groupIII	12324443	12324653	3.28	6.9e-05	C
ENSGACG00000016921	groupXIV-244	groupXIV	6435117	6435327	2.07	1.5e-06	C
ENSGACG00000016921	groupXIV-252	groupXIV	6434658	6434868	2.09	1.59e-06	C
ENSGACG00000016928	groupXIV-244	groupXIV	6435117	6435327	2.07	1.5e-06	C
ENSGACG00000016928	groupXIV-252	groupXIV	6434658	6434868	2.09	1.59e-06	C
ENSGACG00000016965	groupXIV-464	groupXIV	6567158	6567368	5.44	2.76e-16	C
ENSGACG00000016973	groupXIV-464	groupXIV	6567158	6567368	5.44	2.76e-16	C
ENSGACG00000016977	groupIV-1985	groupIV	5305947	5306157	2.54	4.69e-05	C
ENSGACG00000016978	groupIV-1985	groupIV	5305947	5306157	2.54	4.69e-05	C
ENSGACG00000016979	groupXIV-688	groupXIV	6577606	6577816	7.28	6.88e-16	C
ENSGACG00000006893	groupVI-740	groupVI	8074698	8074908	2.99	2e-07	C
ENSGACG00000016986	groupII-765	groupII	19230048	19230264	2.11	9.05e-05	E
ENSGACG00000017000	groupII-1431	groupII	19393317	19393527	4.48	1.13e-06	C
ENSGACG00000017005	groupXIV-1502	groupXIV	6628980	6629190	17.92	1.09e-15	C
ENSGACG00000017045	groupIII-1398	groupIII	12710066	12710276	2.99	4.44e-05	C
ENSGACG00000017048	groupXIV-394	groupXIV	6729889	6730105	2.42	1.29e-06	E
ENSGACG00000017050	groupIII-1398	groupIII	12710066	12710276	2.99	4.44e-05	C
ENSGACG00000017051	groupIV-522	groupIV	5471441	5471651	2.04	2.24e-06	C
ENSGACG00000017053	groupXIV-394	groupXIV	6729889	6730105	2.42	1.29e-06	E
ENSGACG00000017062	groupIV-522	groupIV	5471441	5471651	2.04	2.24e-06	C
ENSGACG00000017083	groupIV-185	groupIV	5567867	5568077	2.03	2.51e-09	C
ENSGACG00000017084	groupIII-847	groupIII	12809734	12809944	2.35	2.57e-05	C
ENSGACG00000017116	groupII-668	groupII	20617100	20617310	2.7	3.3e-07	C
ENSGACG00000013001	groupVIII-416	groupVIII	16660398	16660614	2.68	1.21e-07	E
ENSGACG00000017134	groupIX-1161	groupIX	6120230	6120440	3.48	5.18e-06	C
ENSGACG00000017135	groupIV-725	groupIV	5704214	5704430	2.15	2.21e-05	E
ENSGACG00000017136	groupIX-881	groupIX	6121949	6122159	3.63	1.07e-07	C
ENSGACG00000017136	groupIX-1161	groupIX	6120230	6120440	3.48	5.18e-06	C
ENSGACG00000017174	groupIV-1648	groupIV	5767457	5767667	2.54	4.69e-05	C
ENSGACG00000017178	groupIV-1648	groupIV	5767457	5767667	2.54	4.69e-05	C
ENSGACG00000017182	groupII-1110	groupII	21265018	21265234	2.68	4.87e-05	E
ENSGACG00000017201	groupIX-1556	groupIX	6640864	6641074	3.58	1.99e-05	C
ENSGACG00000017211	groupIV-1474	groupIV	6050230	6050440	2.36	5.58e-05	C
ENSGACG00000020869	groupVII-1173	groupVII	27192109	27192319	2.67	1.24e-06	C
ENSGACG00000017247	groupII-1174	groupII	21440160	21440370	2.89	1.14e-05	C
ENSGACG00000017250	groupIX-1369	groupIX	7130788	7130998	2.99	1.14e-05	C
ENSGACG00000017251	groupXIV-1189	groupXIV	7109481	7109691	4.11	4.89e-06	C
ENSGACG00000017254	groupII-1174	groupII	21440160	21440370	2.89	1.14e-05	C
ENSGACG00000017277	groupIX-1297	groupIX	7322213	7322423	3.98	1.01e-07	C
ENSGACG00000017281	groupXIV-638	groupXIV	7180482	7180692	3.83	2.1e-09	C
ENSGACG00000017285	groupXIV-638	groupXIV	7180482	7180692	3.83	2.1e-09	C
ENSGACG00000017305	groupXIV-1507	groupXIV	7305147	7305357	8.21	4.8e-10	C
ENSGACG00000008379	groupV-499	groupV	10375728	10375944	2.04	5.6e-05	E
ENSGACG00000012374	groupI-2680	groupI	15816143	15816353	3.73	7.63e-05	C
ENSGACG00000017357	groupIV-750	groupIV	6487321	6487531	3.16	4.57e-10	C
ENSGACG00000017357	groupIV-907	groupIV	6487967	6488177	2.29	1.17e-05	C
ENSGACG00000017357	groupIV-2251	groupIV	6484731	6484941	2.88	4.44e-05	C
ENSGACG00000017360	groupXIV-1034	groupXIV	7427735	7427945	5.23	6.7e-07	C
ENSGACG00000017360	groupXIV-1508	groupXIV	7425730	7425940	3.92	1.99e-05	C
ENSGACG00000017362	groupIV-750	groupIV	6487321	6487531	3.16	4.57e-10	C
ENSGACG00000017362	groupIV-907	groupIV	6487967	6488177	2.29	1.17e-05	C
ENSGACG00000017395	groupIII-742	groupIII	13839346	13839556	2.14	9.03e-05	C
ENSGACG00000017395	groupIII-2029	groupIII	13786872	13787082	7.09	2.93e-08	C
ENSGACG00000017397	groupIII-2029	groupIII	13786872	13787082	7.09	2.93e-08	C
ENSGACG00000017399	groupIII-742	groupIII	13839346	13839556	2.14	9.03e-05	C
ENSGACG00000013190	groupVIII-1017	groupVIII	17129322	17129532	3.73	3.91e-07	C
ENSGACG00000017418	groupIV-1337	groupIV	6652918	6653134	2.76	4.02e-07	E
ENSGACG00000017424	groupIV-1337	groupIV	6652918	6653134	2.76	4.02e-07	E
ENSGACG00000017437	groupIII-258	groupIII	14034848	14035058	2.07	2.24e-06	C
ENSGACG00000017478	groupIV-579	groupIV	7476608	7476818	2.12	2.37e-06	C
ENSGACG00000017532	groupIV-1342	groupIV	8049879	8050095	2.58	2.93e-05	E
ENSGACG00000017551	groupIV-1342	groupIV	8049879	8050095	2.58	2.93e-05	E
ENSGACG00000017569	groupIV-2129	groupIV	8183898	8184108	3.73	5.42e-06	C
ENSGACG00000017572	groupII-564	groupII	22675504	22675720	2.2	5.37e-06	E
ENSGACG00000017574	groupIV-2129	groupIV	8183898	8184108	3.73	5.42e-06	C
ENSGACG00000017581	groupII-564	groupII	22675504	22675720	2.2	5.37e-06	E
ENSGACG00000017587	groupIX-1677	groupIX	8414580	8414790	3.73	5.42e-06	C
ENSGACG00000017596	groupIX-1677	groupIX	8414580	8414790	3.73	5.42e-06	C
ENSGACG00000016832	groupIX-2077	groupIX	5431786	5431996	3.43	1.99e-05	C
ENSGACG00000017662	groupIX-1170	groupIX	8591701	8591911	2.69	1.77e-05	C
ENSGACG00000017666	groupIV-826	groupIV	8343796	8344006	2.93	3.63e-09	C
ENSGACG00000017666	groupIV-2259	groupIV	8344745	8344955	2.99	4.44e-05	C
ENSGACG00000017669	groupIV-826	groupIV	8343796	8344006	2.93	3.63e-09	C
ENSGACG00000017669	groupIV-2259	groupIV	8344745	8344955	2.99	4.44e-05	C
ENSGACG00000017671	groupIV-2259	groupIV	8344745	8344955	2.99	4.44e-05	C
ENSGACG00000017688	groupIII-2215	groupIII	15372311	15372521	13.44	6.36e-11	C
ENSGACG00000017689	groupIV-589	groupIV	8556157	8556373	2.49	3.65e-09	E
ENSGACG00000017693	groupIII-2215	groupIII	15372311	15372521	13.44	6.36e-11	C
ENSGACG00000017696	groupIII-2215	groupIII	15372311	15372521	13.44	6.36e-11	C
ENSGACG00000017705	groupIII-1324	groupIII	15787127	15787337	3.2	4.53e-06	C
ENSGACG00000017705	groupIII-1263	groupIII	15787610	15787820	3.36	5.18e-06	C
ENSGACG00000017707	groupIX-1170	groupIX	8591701	8591911	2.69	1.77e-05	C
ENSGACG00000017710	groupIII-1324	groupIII	15787127	15787337	3.2	4.53e-06	C
ENSGACG00000017710	groupIII-1263	groupIII	15787610	15787820	3.36	5.18e-06	C
ENSGACG00000017742	groupXIV-604	groupXIV	9163610	9163826	2.59	6.51e-06	E
ENSGACG00000017752	scaffold_137-11	scaffold_137	177485	177695	5.23	4.91e-13	C
ENSGACG00000017752	scaffold_137-12	scaffold_137	172871	173087	3.08	3.83e-06	E
ENSGACG00000017754	scaffold_137-11	scaffold_137	177485	177695	5.23	4.91e-13	C
ENSGACG00000017754	scaffold_137-12	scaffold_137	172871	173087	3.08	3.83e-06	E
ENSGACG00000017764	groupIV-3416	groupIV	9221820	9222030	3.58	1.99e-05	C
ENSGACG00000017769	groupIV-3416	groupIV	9221820	9222030	3.58	1.99e-05	C
ENSGACG00000017820	groupXIV-977	groupXIV	9625011	9625221	2.89	1.14e-05	C
ENSGACG00000017837	groupIV-1662	groupIV	9356105	9356315	2.89	1.14e-05	C
ENSGACG00000017844	groupIV-1662	groupIV	9356105	9356315	2.89	1.14e-05	C
ENSGACG00000017846	groupIV-1289	groupIV	9394218	9394428	2.55	8.87e-06	C
ENSGACG00000017848	groupIV-1289	groupIV	9394218	9394428	2.55	8.87e-06	C
ENSGACG00000017869	groupIV-313	groupIV	9472759	9472969	2.08	4.76e-07	C
ENSGACG00000017869	groupIV-1261	groupIV	9479531	9479747	2.31	2.86e-05	E
ENSGACG00000017871	groupIV-1261	groupIV	9479531	9479747	2.31	2.86e-05	E
ENSGACG00000017886	groupXIV-1305	groupXIV	10260590	10260800	4.29	1.13e-06	C
ENSGACG00000017890	groupXIV-1305	groupXIV	10260590	10260800	4.29	1.13e-06	C
ENSGACG00000017890	groupXIV-1399	groupXIV	10276475	10276685	4.29	1.13e-06	C
ENSGACG00000017896	groupIV-870	groupIV	9766563	9766779	2.16	5.94e-06	E
ENSGACG00000017904	groupIII-1217	groupIII	16310946	16311162	3.85	9.27e-08	E
ENSGACG00000017909	groupIII-1217	groupIII	16310946	16311162	3.85	9.27e-08	E
ENSGACG00000017915	groupIV-492	groupIV	10060825	10061041	2.05	1.31e-06	E
ENSGACG00000017923	groupIII-405	groupIII	16356224	16356434	2.12	4.94e-07	C
ENSGACG00000017930	groupIX-382	groupIX	8924161	8924371	2.89	2.85e-09	C
ENSGACG00000017940	groupIV-734	groupIV	10519740	10519956	2.36	3.19e-06	E
ENSGACG00000017942	groupIV-1796	groupIV	10554604	10554820	2.47	7.72e-05	E
ENSGACG00000017944	groupIV-1796	groupIV	10554604	10554820	2.47	7.72e-05	E
ENSGACG00000017955	groupIII-934	groupIII	16534363	16534579	2.58	2.93e-05	E
ENSGACG00000000364	scaffold_27-548	scaffold_27	304871	305081	3.73	7.63e-05	C
ENSGACG00000018016	groupIV-291	groupIV	10957927	10958137	2.15	4.41e-09	C
ENSGACG00000018016	groupIV-1292	groupIV	10958857	10959067	3.08	3.73e-06	C
ENSGACG00000018023	groupIV-1292	groupIV	10958857	10959067	3.08	3.73e-06	C
ENSGACG00000018024	groupIX-1007	groupIX	9624057	9624273	2.34	5.16e-05	E
ENSGACG00000018034	groupIX-1686	groupIX	9716945	9717155	4.29	1.13e-06	C
ENSGACG00000018035	groupIV-3126	groupIV	11027617	11027827	3.55	7.63e-05	C
ENSGACG00000018094	groupXIV-979	groupXIV	11226122	11226332	5.23	1.02e-08	C
ENSGACG00000018095	groupXIV-979	groupXIV	11226122	11226332	5.23	1.02e-08	C
ENSGACG00000018099	groupXIV-979	groupXIV	11226122	11226332	5.23	1.02e-08	C
ENSGACG00000020111	groupVII-1778	groupVII	11092809	11093019	3.63	1.07e-07	C
ENSGACG00000020111	groupVII-2434	groupVII	11092230	11092440	4.29	1.13e-06	C
ENSGACG00000017544	groupII-550	groupII	22611962	22612172	2.12	2.67e-05	C
ENSGACG00000014065	groupXIII-470	groupXIII	18023077	18023287	2.03	3.54e-05	C
ENSGACG00000017128	groupIV-725	groupIV	5704214	5704430	2.15	2.21e-05	E
ENSGACG00000018161	groupIV-1486	groupIV	11767107	11767317	2.54	4.69e-05	C
ENSGACG00000018163	groupIX-931	groupIX	10193376	10193586	6.16	9.88e-12	C
ENSGACG00000018163	groupIX-1688	groupIX	10194000	10194210	3.73	5.42e-06	C
ENSGACG00000018173	groupXIV-571	groupXIV	11621756	11621972	3.35	2.5e-08	E
ENSGACG00000018188	groupIV-965	groupIV	11854365	11854575	2.41	1.56e-05	C
ENSGACG00000018200	groupIV-965	groupIV	11854365	11854575	2.41	1.56e-05	C
ENSGACG00000018202	groupIX-822	groupIX	10451026	10451236	4.2	3.19e-11	C
ENSGACG00000018202	groupIX-1178	groupIX	10450434	10450644	3.08	3.73e-06	C
ENSGACG00000018205	groupIX-822	groupIX	10451026	10451236	4.2	3.19e-11	C
ENSGACG00000018205	groupIX-1178	groupIX	10450434	10450644	3.08	3.73e-06	C
ENSGACG00000018223	groupIX-1695	groupIX	10580980	10581190	8.21	4.8e-10	C
ENSGACG00000018231	groupIV-1030	groupIV	12029742	12029958	2.15	2.21e-05	E
ENSGACG00000018258	groupIV-471	groupIV	12321190	12321406	2.08	7.66e-06	E
ENSGACG00000018261	groupIX-575	groupIX	10789044	10789260	2.1	4.87e-05	E
ENSGACG00000018263	groupIV-471	groupIV	12321190	12321406	2.08	7.66e-06	E
ENSGACG00000018292	groupIV-1363	groupIV	12491105	12491315	3.32	9.34e-08	C
ENSGACG00000018292	groupIV-3140	groupIV	12487106	12487316	4.67	2.48e-07	C
ENSGACG00000018296	groupIV-1363	groupIV	12491105	12491315	3.32	9.34e-08	C
ENSGACG00000018296	groupIV-2276	groupIV	12537899	12538109	2.99	4.44e-05	C
ENSGACG00000018296	groupIV-3140	groupIV	12487106	12487316	4.67	2.48e-07	C
ENSGACG00000018297	groupIX-610	groupIX	10921672	10921888	2.45	2.97e-07	E
ENSGACG00000018299	groupIX-610	groupIX	10921672	10921888	2.45	2.97e-07	E
ENSGACG00000018316	groupIV-1091	groupIV	12866654	12866864	4.69	4.85e-12	C
ENSGACG00000018316	groupIV-1777	groupIV	12867686	12867896	3.63	1.07e-07	C
ENSGACG00000018316	groupIV-2442	groupIV	12868279	12868489	4.85	5.16e-08	C
ENSGACG00000018318	groupIV-1091	groupIV	12866654	12866864	4.69	4.85e-12	C
ENSGACG00000018318	groupIV-1777	groupIV	12867686	12867896	3.63	1.07e-07	C
ENSGACG00000018318	groupIV-2442	groupIV	12868279	12868489	4.85	5.16e-08	C
ENSGACG00000010163	groupXIX-375	groupXIX	11862116	11862332	2.14	1.2e-05	E
ENSGACG00000018367	groupIV-1599	groupIV	13386908	13387118	3.45	1.04e-07	C
ENSGACG00000018374	groupIV-1599	groupIV	13386908	13387118	3.45	1.04e-07	C
ENSGACG00000018403	groupXIV-647	groupXIV	14261553	14261769	2.23	1.79e-05	E
ENSGACG00000018404	groupXIV-647	groupXIV	14261553	14261769	2.23	1.79e-05	E
ENSGACG00000018407	groupIV-668	groupIV	13822787	13823003	2.03	8.76e-06	E
ENSGACG00000018449	groupIV-880	groupIV	14068975	14069185	2.59	4.63e-07	C
ENSGACG00000018485	groupIV-2913	groupIV	14519334	14519544	5.97	2.16e-08	C
ENSGACG00000018504	groupIX-1029	groupIX	12692394	12692604	9.46	4.16e-18	C
ENSGACG00000018504	groupIX-1841	groupIX	12703356	12703566	5.47	1.24e-07	C
ENSGACG00000014895	groupI-1043	groupI	23149485	23149695	2.99	7.64e-07	C
ENSGACG00000018557	groupVII-2079	groupVII	124987	125197	3.73	5.42e-06	C
ENSGACG00000018558	groupIV-3495	groupIV	15690687	15690897	13.44	6.36e-11	C
ENSGACG00000018569	groupXIV-806	groupXIV	14712744	14712954	7.96	2.07e-13	C
ENSGACG00000018573	groupXIV-806	groupXIV	14712744	14712954	7.96	2.07e-13	C
ENSGACG00000018583	groupIX-1845	groupIX	13529057	13529267	3.43	1.99e-05	C
ENSGACG00000018594	groupVII-1978	groupVII	218692	218902	8.96	5.61e-11	C
ENSGACG00000018644	groupXIV-887	groupXIV	15010997	15011207	3.41	1.35e-06	C
ENSGACG00000018650	groupXIV-887	groupXIV	15010997	15011207	3.41	1.35e-06	C
ENSGACG00000018701	scaffold_208-9	scaffold_208	37481	37697	3.27	2.39e-06	E
ENSGACG00000018720	groupVII-1554	groupVII	688846	689062	3.27	2.39e-06	E
ENSGACG00000018770	groupIV-2301	groupIV	17703717	17703927	2.99	4.44e-05	C
ENSGACG00000018774	groupIV-2301	groupIV	17703717	17703927	2.99	4.44e-05	C
ENSGACG00000018790	groupIX-1032	groupIX	14519179	14519389	11.57	4.79e-17	C
ENSGACG00000001433	scaffold_111-18	scaffold_111	82516	82732	2.95	9.77e-08	E
ENSGACG00000018792	groupIX-1032	groupIX	14519179	14519389	11.57	4.79e-17	C
ENSGACG00000018797	groupIX-719	groupIX	14551114	14551324	2.81	1.18e-07	C
ENSGACG00000018800	groupIX-719	groupIX	14551114	14551324	2.81	1.18e-07	C
ENSGACG00000016619	groupXIV-1177	groupXIV	5272055	5272265	37.33	3.61e-22	C
ENSGACG00000018833	groupIV-927	groupIV	18391925	18392141	2.23	6.75e-05	E
ENSGACG00000018838	groupIV-3513	groupIV	18435760	18435970	4.73	3.4e-06	C
ENSGACG00000018841	groupIV-1693	groupIV	18453215	18453425	2.38	8.21e-05	C
ENSGACG00000018843	groupIV-2944	groupIV	18482720	18482930	5.97	2.16e-08	C
ENSGACG00000018844	groupIV-3514	groupIV	18501689	18501899	3.73	7.63e-05	C
ENSGACG00000018846	groupIV-3514	groupIV	18501689	18501899	3.73	7.63e-05	C
ENSGACG00000018852	groupIV-971	groupIV	18550052	18550262	3.66	1.67e-10	C
ENSGACG00000018853	groupIV-971	groupIV	18550052	18550262	3.66	1.67e-10	C
ENSGACG00000018866	groupVII-1218	groupVII	1451595	1451805	2.55	8.87e-06	C
ENSGACG00000018867	groupVII-1218	groupVII	1451595	1451805	2.55	8.87e-06	C
ENSGACG00000018870	groupVII-536	groupVII	1474341	1474551	3.09	1.02e-10	C
ENSGACG00000018872	groupVII-536	groupVII	1474341	1474551	3.09	1.02e-10	C
ENSGACG00000018889	groupIX-1998	groupIX	14801679	14801889	14.93	4.52e-12	C
ENSGACG00000018890	groupIX-1998	groupIX	14801679	14801889	14.93	4.52e-12	C
ENSGACG00000018942	groupIV-3210	groupIV	19709167	19709377	5.23	6.7e-07	C
ENSGACG00000012350	groupXIII-556	groupXIII	14343349	14343559	2.04	2.35e-05	C
ENSGACG00000006220	groupXIII-2063	groupXIII	4816150	4816360	5.72	2.16e-08	C
ENSGACG00000018982	groupVII-1178	groupVII	2079949	2080159	4.16	4.32e-10	C
ENSGACG00000019018	groupIV-2054	groupIV	20725520	20725730	3.48	5.18e-06	C
ENSGACG00000019043	groupIX-902	groupIX	15231493	15231709	2.38	1.18e-05	E
ENSGACG00000012973	groupI-1547	groupI	16694340	16694550	10.45	6.44e-14	C
ENSGACG00000020408	groupVII-2323	groupVII	18105884	18106094	6.47	5.59e-10	C
ENSGACG00000019048	groupIX-1410	groupIX	15287935	15288145	2.71	9.4e-05	C
ENSGACG00000019054	groupIX-1410	groupIX	15287935	15288145	2.71	9.4e-05	C
ENSGACG00000018137	groupIV-1426	groupIV	11605813	11606023	2.91	7.64e-07	C
ENSGACG00000018137	groupIV-1425	groupIV	11605072	11605282	2.74	2.45e-05	C
ENSGACG00000019109	groupIX-1087	groupIX	15447174	15447384	2.57	6.68e-05	C
ENSGACG00000019122	groupIX-510	groupIX	15465955	15466165	2.63	2.53e-09	C
ENSGACG00000019128	groupIV-984	groupIV	21831248	21831464	2.27	4.24e-06	E
ENSGACG00000019136	groupIV-2318	groupIV	21964868	21965078	3.41	1.35e-06	C
ENSGACG00000019141	groupIX-2156	groupIX	15522963	15523173	3.73	7.63e-05	C
ENSGACG00000019143	groupIX-2156	groupIX	15522963	15523173	3.73	7.63e-05	C
ENSGACG00000019156	groupIV-697	groupIV	22057892	22058102	2.51	4.49e-08	C
ENSGACG00000019169	groupIV-795	groupIV	22119294	22119504	2.37	1.42e-06	C
ENSGACG00000019171	groupIV-795	groupIV	22119294	22119504	2.37	1.42e-06	C
ENSGACG00000019173	groupIV-795	groupIV	22119294	22119504	2.37	1.42e-06	C
ENSGACG00000019193	groupIV-3231	groupIV	22476706	22476916	3.73	7.63e-05	C
ENSGACG00000019193	groupIV-3567	groupIV	22475486	22475696	7.47	2.93e-08	C
ENSGACG00000019199	groupVII-1341	groupVII	2974409	2974619	4.93	8.07e-10	C
ENSGACG00000019201	groupVII-1341	groupVII	2974409	2974619	4.93	8.07e-10	C
ENSGACG00000019223	groupIV-565	groupIV	22871939	22872149	2.69	6.49e-08	C
ENSGACG00000019240	groupIV-2726	groupIV	23089766	23089976	3.73	7.63e-05	C
ENSGACG00000019275	groupVII-1081	groupVII	3136298	3136508	2.85	5.9e-07	C
ENSGACG00000019275	groupVII-1290	groupVII	3135738	3135948	2.49	2.26e-05	C
ENSGACG00000019279	groupVII-1081	groupVII	3136298	3136508	2.85	5.9e-07	C
ENSGACG00000019279	groupVII-1290	groupVII	3135738	3135948	2.49	2.26e-05	C
ENSGACG00000019280	groupVII-1015	groupVII	3152052	3152262	2.19	9.03e-05	C
ENSGACG00000019285	groupVII-1015	groupVII	3152052	3152262	2.19	9.03e-05	C
ENSGACG00000019285	groupVII-1413	groupVII	3158456	3158666	2.71	9.4e-05	C
ENSGACG00000019297	groupVII-1668	groupVII	3268217	3268433	3.35	2.5e-08	E
ENSGACG00000019298	groupIX-613	groupIX	16395134	16395344	2.28	1.56e-06	C
ENSGACG00000019298	groupIX-1036	groupIX	16395847	16396057	4.35	1.34e-09	C
ENSGACG00000019303	groupIX-613	groupIX	16395134	16395344	2.28	1.56e-06	C
ENSGACG00000019303	groupIX-1036	groupIX	16395847	16396057	4.35	1.34e-09	C
ENSGACG00000019326	groupVII-1049	groupVII	4091396	4091606	3.36	3.55e-07	C
ENSGACG00000019344	groupIV-610	groupIV	24377898	24378108	2.48	4.49e-08	C
ENSGACG00000019353	groupIX-2015	groupIX	16610986	16611196	3.92	1.99e-05	C
ENSGACG00000019357	groupIX-1037	groupIX	16782143	16782353	6.91	3.53e-14	C
ENSGACG00000019359	groupIX-1037	groupIX	16782143	16782353	6.91	3.53e-14	C
ENSGACG00000019372	groupIX-2350	groupIX	16851818	16852028	7.47	2.93e-08	C
ENSGACG00000019374	groupIX-2350	groupIX	16851818	16852028	7.47	2.93e-08	C
ENSGACG00000019394	groupIX-833	groupIX	17085519	17085729	2.67	1.24e-06	C
ENSGACG00000019397	groupIX-2019	groupIX	17166242	17166452	4.11	4.89e-06	C
ENSGACG00000019425	groupVII-500	groupVII	4545614	4545824	2.07	1.13e-05	C
ENSGACG00000019428	groupVII-2401	groupVII	4571420	4571630	4.48	1.13e-06	C
ENSGACG00000019429	groupVII-2401	groupVII	4571420	4571630	4.48	1.13e-06	C
ENSGACG00000019442	groupIX-2359	groupIX	17433518	17433728	3.92	1.99e-05	C
ENSGACG00000019446	groupIX-1270	groupIX	17554731	17554941	3.86	1.01e-07	C
ENSGACG00000019450	groupVII-896	groupVII	4848182	4848392	2.14	9.03e-05	C
ENSGACG00000019461	groupIV-1854	groupIV	25017336	25017552	3.27	2.39e-06	E
ENSGACG00000019472	groupIV-486	groupIV	25421266	25421476	2.9	2.01e-10	C
ENSGACG00000019480	groupIV-486	groupIV	25421266	25421476	2.9	2.01e-10	C
ENSGACG00000019523	groupIX-796	groupIX	18006187	18006397	7.47	6.88e-16	C
ENSGACG00000019523	groupIX-1274	groupIX	18010154	18010364	10.08	6.44e-14	C
ENSGACG00000008268	groupXVII-600	groupXVII	7789392	7789602	3.21	2.46e-08	C
ENSGACG00000019562	groupIX-701	groupIX	18258855	18259065	2.11	8.66e-05	C
ENSGACG00000019564	groupIX-701	groupIX	18258855	18259065	2.11	8.66e-05	C
ENSGACG00000019574	groupVII-1344	groupVII	6594959	6595169	8.96	3.53e-16	C
ENSGACG00000019591	groupIX-1421	groupIX	18420757	18420967	8.96	5.61e-11	C
ENSGACG00000019597	groupIX-1421	groupIX	18420757	18420967	8.96	5.61e-11	C
ENSGACG00000019618	groupVII-1345	groupVII	6806300	6806510	4.73	6.28e-11	C
ENSGACG00000019619	groupIV-3252	groupIV	27570575	27570785	3.73	7.63e-05	C
ENSGACG00000019620	groupIX-595	groupIX	18526316	18526526	2.28	7.91e-06	C
ENSGACG00000019661	groupIX-440	groupIX	18679470	18679680	2.28	7.18e-07	C
ENSGACG00000019662	groupIV-2512	groupIV	28468967	28469177	4.11	4.89e-06	C
ENSGACG00000019663	groupIV-2512	groupIV	28468967	28469177	4.11	4.89e-06	C
ENSGACG00000019677	groupVII-1574	groupVII	7063168	7063384	2.78	3.78e-06	E
ENSGACG00000019712	groupIV-644	groupIV	29081727	29081943	2.23	4.8e-06	E
ENSGACG00000019726	groupIX-116	groupIX	19005546	19005756	2.29	1.84e-09	C
ENSGACG00000019727	groupIX-116	groupIX	19005546	19005756	2.29	1.84e-09	C
ENSGACG00000019742	groupIV-1459	groupIV	29676295	29676505	3.86	1.01e-07	C
ENSGACG00000019742	groupIV-2209	groupIV	29678320	29678530	3.98	1.01e-07	C
ENSGACG00000019742	groupIV-2210	groupIV	29679152	29679362	3.98	1.01e-07	C
ENSGACG00000019744	groupIV-1145	groupIV	29700007	29700223	2.11	9.05e-05	E
ENSGACG00000019745	groupVII-1297	groupVII	7453083	7453293	2.99	1.14e-05	C
ENSGACG00000019745	groupVII-3075	groupVII	7453743	7453953	3.92	1.99e-05	C
ENSGACG00000019746	groupIV-1145	groupIV	29700007	29700223	2.11	9.05e-05	E
ENSGACG00000019768	groupVII-1053	groupVII	7649444	7649654	2.24	5.99e-05	C
ENSGACG00000019776	groupIV-3281	groupIV	29869846	29870056	4.11	4.89e-06	C
ENSGACG00000019777	groupIV-3281	groupIV	29869846	29870056	4.11	4.89e-06	C
ENSGACG00000019783	groupIV-1377	groupIV	29940149	29940365	2.79	8.01e-06	E
ENSGACG00000019785	groupIV-647	groupIV	29973871	29974087	2.07	4.15e-06	E
ENSGACG00000019803	groupVII-628	groupVII	7692865	7693081	2.34	1.14e-07	E
ENSGACG00000019811	groupIX-1749	groupIX	19599494	19599704	2.99	4.44e-05	C
ENSGACG00000019840	groupVII-1681	groupVII	7820964	7821174	3.31	1.35e-06	C
ENSGACG00000019844	groupVII-1681	groupVII	7820964	7821174	3.31	1.35e-06	C
ENSGACG00000019876	groupVII-1115	groupVII	7887081	7887291	7.47	6.88e-16	C
ENSGACG00000019877	groupVII-1115	groupVII	7887081	7887291	7.47	6.88e-16	C
ENSGACG00000019898	groupIX-757	groupIX	19956768	19956984	2.23	1.79e-05	E
ENSGACG00000019899	groupIX-757	groupIX	19956768	19956984	2.23	1.79e-05	E
ENSGACG00000019931	groupVII-1056	groupVII	8625675	8625885	2.24	5.99e-05	C
ENSGACG00000019931	groupVII-1350	groupVII	8625130	8625340	3.41	1.35e-06	C
ENSGACG00000019933	groupVII-1056	groupVII	8625675	8625885	2.24	5.99e-05	C
ENSGACG00000019933	groupVII-1350	groupVII	8625130	8625340	3.41	1.35e-06	C
ENSGACG00000019960	groupVII-1149	groupVII	9022065	9022275	3.48	7.93e-09	C
ENSGACG00000019960	groupVII-2267	groupVII	9028928	9029138	10.08	6.44e-14	C
ENSGACG00000011353	groupXII-1459	groupXII	15157654	15157864	4.48	1.82e-08	C
ENSGACG00000011353	groupXII-1898	groupXII	15159025	15159235	4.48	1.13e-06	C
ENSGACG00000019988	groupIV-1177	groupIV	31603751	31603961	3.4	2.77e-08	C
ENSGACG00000019990	groupIV-1177	groupIV	31603751	31603961	3.4	2.77e-08	C
ENSGACG00000019991	groupVII-3093	groupVII	9295760	9295970	7.09	2.93e-08	C
ENSGACG00000019995	groupIV-3032	groupIV	31633059	31633269	6.22	3.57e-09	C
ENSGACG00000020009	groupIV-1068	groupIV	31773472	31773682	2.36	5.58e-05	C
ENSGACG00000020043	groupVII-689	groupVII	10185136	10185352	2.06	2.82e-05	E
ENSGACG00000020069	groupVII-2433	groupVII	10326686	10326896	10.45	6.44e-14	C
ENSGACG00000000367	scaffold_27-581	scaffold_27	459891	460101	3.43	1.99e-05	C
ENSGACG00000020094	groupIV-774	groupIV	32525164	32525374	2.28	1.06e-06	C
ENSGACG00000020098	groupIV-774	groupIV	32525164	32525374	2.28	1.06e-06	C
ENSGACG00000020140	scaffold_84-8	scaffold_84	218261	218477	2.09	2.09e-06	E
ENSGACG00000020169	groupVII-1588	groupVII	12680101	12680311	3.09	1.45e-05	C
ENSGACG00000020201	groupVII-702	groupVII	13504531	13504741	2.36	6.65e-07	C
ENSGACG00000020202	groupVII-702	groupVII	13504531	13504741	2.36	6.65e-07	C
ENSGACG00000020222	groupVII-3139	groupVII	14324149	14324359	3.73	7.63e-05	C
ENSGACG00000020236	groupVII-703	groupVII	14696889	14697099	5.23	4.15e-19	C
ENSGACG00000020236	groupVII-989	groupVII	14692914	14693124	2.71	4.68e-06	C
ENSGACG00000020237	groupVII-703	groupVII	14696889	14697099	5.23	4.15e-19	C
ENSGACG00000020237	groupVII-989	groupVII	14692914	14693124	2.71	4.68e-06	C
ENSGACG00000020259	groupVII-866	groupVII	15002952	15003162	2.12	1.78e-05	C
ENSGACG00000020263	groupVII-1605	groupVII	15111424	15111640	2.59	6.51e-06	E
ENSGACG00000020314	groupVII-2197	groupVII	16805082	16805298	2.58	2.93e-05	E
ENSGACG00000020322	groupVII-1071	groupVII	16984242	16984458	2.25	8.72e-06	E
ENSGACG00000008224	groupI-826	groupI	6908067	6908277	2.12	2.67e-05	C
ENSGACG00000008224	groupI-1717	groupI	6910850	6911060	3.61	1.46e-06	C
ENSGACG00000020333	groupVII-1522	groupVII	17162019	17162229	3.17	1.17e-06	C
ENSGACG00000020333	groupVII-2035	groupVII	17160482	17160692	3.73	3.91e-07	C
ENSGACG00000020357	groupVII-1409	groupVII	17409741	17409957	2.59	6.51e-06	E
ENSGACG00000020358	groupVII-1409	groupVII	17409741	17409957	2.59	6.51e-06	E
ENSGACG00000020367	groupVII-1187	groupVII	17562130	17562346	2.23	6.75e-05	E
ENSGACG00000003372	groupXXI-425	groupXXI	7915013	7915229	2.29	5.96e-05	E
ENSGACG00000020388	groupVII-1189	groupVII	17851623	17851839	2.17	4.08e-05	E
ENSGACG00000020389	groupVII-1189	groupVII	17851623	17851839	2.17	4.08e-05	E
ENSGACG00000020403	groupVII-1190	groupVII	18021383	18021599	2.26	3.27e-05	E
ENSGACG00000020404	groupVII-1190	groupVII	18021383	18021599	2.26	3.27e-05	E
ENSGACG00000020407	groupVII-2323	groupVII	18105884	18106094	6.47	5.59e-10	C
ENSGACG00000020415	groupVII-87	groupVII	18205678	18205888	2.03	1.47e-11	C
ENSGACG00000020416	groupVII-87	groupVII	18205678	18205888	2.03	1.47e-11	C
ENSGACG00000020421	groupVII-1373	groupVII	18361595	18361805	2.69	1.77e-05	C
ENSGACG00000020421	groupVII-1531	groupVII	18343514	18343724	2.44	8.21e-05	C
ENSGACG00000020421	groupVII-1615	groupVII	18360020	18360230	2.44	8.21e-05	C
ENSGACG00000020429	groupVII-3186	groupVII	18439750	18439960	3.28	6.9e-05	C
ENSGACG00000020430	groupVII-3186	groupVII	18439750	18439960	3.28	6.9e-05	C
ENSGACG00000020433	groupVII-801	groupVII	18547632	18547842	2.79	2.34e-08	C
ENSGACG00000020434	groupVII-622	groupVII	18548198	18548408	2.21	7.41e-07	C
ENSGACG00000020434	groupVII-801	groupVII	18547632	18547842	2.79	2.34e-08	C
ENSGACG00000020444	groupVII-1811	groupVII	18663063	18663273	2.99	4.44e-05	C
ENSGACG00000020475	groupVII-1129	groupVII	19089304	19089514	5.23	4.91e-13	C
ENSGACG00000020521	groupVII-1096	groupVII	19486894	19487104	2.24	5.99e-05	C
ENSGACG00000020522	groupVII-1096	groupVII	19486894	19487104	2.24	5.99e-05	C
ENSGACG00000020554	groupVII-513	groupVII	20014307	20014523	2.08	1.83e-07	E
ENSGACG00000020555	groupVII-513	groupVII	20014307	20014523	2.08	1.83e-07	E
ENSGACG00000020560	groupVII-1458	groupVII	20198947	20199157	2.76	6.42e-06	C
ENSGACG00000020571	groupVII-1519	groupVII	20400758	20400974	2.68	2.28e-05	E
ENSGACG00000020572	groupVII-1519	groupVII	20400758	20400974	2.68	2.28e-05	E
ENSGACG00000020583	groupVII-2927	groupVII	20703391	20703601	4.29	1.13e-06	C
ENSGACG00000020585	groupVII-2927	groupVII	20703391	20703601	4.29	1.13e-06	C
ENSGACG00000020591	groupVII-2711	groupVII	20857344	20857554	7.84	3.87e-09	C
ENSGACG00000020630	groupVII-1465	groupVII	21602852	21603062	3.31	1.35e-06	C
ENSGACG00000020630	groupVII-2510	groupVII	21595878	21596088	4.67	2.48e-07	C
ENSGACG00000020091	groupIV-774	groupIV	32525164	32525374	2.28	1.06e-06	C
ENSGACG00000020658	groupVII-1544	groupVII	22034585	22034795	3.36	3.55e-07	C
ENSGACG00000004679	groupXVIII-565	groupXVIII	1274787	1275003	3.44	5.28e-10	E
ENSGACG00000015810	scaffold_135-17	scaffold_135	172667	172883	2.95	1.2e-05	E
ENSGACG00000020729	groupVII-1636	groupVII	23332772	23332982	3.36	5.18e-06	C
ENSGACG00000020741	groupVII-2532	groupVII	23673519	23673729	3.28	6.9e-05	C
ENSGACG00000020742	groupVII-1147	groupVII	23707788	23708004	2.47	2.25e-06	E
ENSGACG00000020745	groupVII-496	groupVII	23910671	23910881	2.56	3.45e-09	C
ENSGACG00000020746	groupVII-496	groupVII	23910671	23910881	2.56	3.45e-09	C
ENSGACG00000020750	groupVII-532	groupVII	24027587	24027797	2.51	2.45e-09	C
ENSGACG00000020751	groupVII-1397	groupVII	24030856	24031066	4.48	1.34e-09	C
ENSGACG00000020751	groupVII-1738	groupVII	24031754	24031964	2.99	1.14e-05	C
ENSGACG00000020753	groupVII-3252	groupVII	24049922	24050132	4.23	7.14e-05	C
ENSGACG00000020754	groupVII-3252	groupVII	24049922	24050132	4.23	7.14e-05	C
ENSGACG00000020763	groupVII-2200	groupVII	24184448	24184658	3.73	5.42e-06	C
ENSGACG00000020771	groupVII-712	groupVII	24312184	24312394	2.28	2.3e-06	C
ENSGACG00000020773	groupVII-3261	groupVII	24426876	24427086	3.28	6.9e-05	C
ENSGACG00000020797	groupVII-1643	groupVII	25255311	25255521	8.21	2.57e-14	C
ENSGACG00000020798	groupVII-1329	groupVII	25279371	25279581	4.23	5.89e-09	C
ENSGACG00000020827	groupVII-3276	groupVII	26212035	26212245	7.09	2.93e-08	C
ENSGACG00000020828	groupVII-3276	groupVII	26212035	26212245	7.09	2.93e-08	C
ENSGACG00000020873	groupVII-1173	groupVII	27192109	27192319	2.67	1.24e-06	C
ENSGACG00000020874	groupVII-1173	groupVII	27192109	27192319	2.67	1.24e-06	C
ENSGACG00000020876	groupVII-1173	groupVII	27192109	27192319	2.67	1.24e-06	C
ENSGACG00000020878	groupVII-949	groupVII	27250725	27250935	3.3	5.25e-10	C
ENSGACG00000020895	groupVII-1857	groupVII	27687568	27687778	2.65	6.68e-05	C
ENSGACG00000020896	groupVII-1857	groupVII	27687568	27687778	2.65	6.68e-05	C
ENSGACG00000020896	groupVII-2780	groupVII	27694140	27694350	3.73	7.63e-05	C
ENSGACG00000019041	groupIX-902	groupIX	15231493	15231709	2.38	1.18e-05	E
ENSGACG00000020905	groupVII-994	groupVII	27759246	27759462	2.13	4.48e-05	E
ENSGACG00000020913	groupVII-644	groupVII	27851230	27851440	4.28	7.38e-16	C
ENSGACG00000022847	scaffold_196-7	scaffold_196	22763	22973	8.21	4.8e-10	C
ENSGACG00000022717	groupXI-820	groupXI	3742491	3742701	2.35	2.57e-05	C

## Sheet: baseline_30
ensembl_gene_id	X.PeakID	chr	start	end	strand	Normalized.Tag.Count	focus.ratio	findPeaks.Score	Total.Tags..normalized.to.Control.Experiment.	Control.Tags	Fold.Change.vs.Control	p.value.vs.Control	Clonal.Fold.Change
ENSGACG00000000009	scaffold_89-17	scaffold_89	55049	55245	+	17	0.643	21	7.3	1	7.3	8.32e-05	0.91
ENSGACG00000000010	scaffold_89-8	scaffold_89	61900	62096	+	38	0.672	40	16.8	2	8.38	4.8e-10	0.94
ENSGACG00000000011	scaffold_89-4	scaffold_89	64561	64757	+	60	0.729	64	25.8	3	8.59	3.07e-15	0.9
ENSGACG00000000012	scaffold_89-15	scaffold_89	93794	93990	+	24	0.735	25	10.3	2	5.15	4.65e-05	0.95
ENSGACG00000000013	scaffold_89-15	scaffold_89	93794	93990	+	24	0.735	25	10.3	2	5.15	4.65e-05	0.95
ENSGACG00000000016	scaffold_89-5	scaffold_89	188495	188691	+	51	0.708	54	21.9	0.5	43.81	5.66e-27	0.93
ENSGACG00000000016	scaffold_89-7	scaffold_89	192008	192204	+	50	0.733	51	21.5	2	10.74	6.11e-15	0.93
ENSGACG00000000017	scaffold_89-7	scaffold_89	192008	192204	+	50	0.733	51	21.5	2	10.74	6.11e-15	0.93
ENSGACG00000000024	scaffold_89-2	scaffold_89	262805	263001	+	113	0.729	114	49	4	12.24	1.27e-34	0.86
ENSGACG00000000027	scaffold_89-13	scaffold_89	290847	291043	+	25	0.692	29	10.7	2	5.37	4.65e-05	1.03
ENSGACG00000000028	scaffold_204-1	scaffold_204	19252	19448	+	112	0.856	112	48.5	6	8.09	5.11e-27	0.89
ENSGACG00000000028	scaffold_204-3	scaffold_204	18453	18649	+	64	0.753	64	27.5	6	4.58	2.96e-10	0.9
ENSGACG00000000029	scaffold_204-1	scaffold_204	19252	19448	+	112	0.856	112	48.5	6	8.09	5.11e-27	0.89
ENSGACG00000000029	scaffold_204-3	scaffold_204	18453	18649	+	64	0.753	64	27.5	6	4.58	2.96e-10	0.9
ENSGACG00000000030	scaffold_89-13	scaffold_89	290847	291043	+	25	0.692	29	10.7	2	5.37	4.65e-05	1.03
ENSGACG00000000031	scaffold_89-1	scaffold_89	299143	299339	+	132	0.821	135	56.7	4	14.17	1.44e-43	0.83
ENSGACG00000000033	scaffold_89-1	scaffold_89	299143	299339	+	132	0.821	135	56.7	4	14.17	1.44e-43	0.83
ENSGACG00000000034	scaffold_204-4	scaffold_204	82744	82940	+	50	0.654	51	21.5	3	7.16	1.18e-11	0.95
ENSGACG00000000035	scaffold_89-3	scaffold_89	323011	323207	+	60	0.648	65	25.8	7	3.68	1.07e-07	0.95
ENSGACG00000000035	scaffold_89-6	scaffold_89	331387	331583	+	51	0.679	52	21.9	2	10.95	6.11e-15	0.95
ENSGACG00000000037	scaffold_89-3	scaffold_89	323011	323207	+	60	0.648	65	25.8	7	3.68	1.07e-07	0.95
ENSGACG00000000037	scaffold_89-6	scaffold_89	331387	331583	+	51	0.679	52	21.9	2	10.95	6.11e-15	0.95
ENSGACG00000000038	scaffold_204-4	scaffold_204	82744	82940	+	50	0.654	51	21.5	3	7.16	1.18e-11	0.95
ENSGACG00000000038	scaffold_204-2	scaffold_204	90789	90985	+	68	0.75	69	29.2	9	3.25	9.34e-08	0.94
ENSGACG00000000043	scaffold_243-1	scaffold_243	46100	46296	+	58	0.663	60	24.9	5	4.98	8.07e-10	0.96
ENSGACG00000000043	scaffold_243-4	scaffold_243	47182	47378	+	19	0.783	21	8.2	1	8.16	1.02e-05	0.96
ENSGACG00000000057	scaffold_422-1	scaffold_422	10212	10408	+	151	0.701	149	64.9	4	16.21	5.23e-53	0.81
ENSGACG00000000057	scaffold_422-2	scaffold_422	7769	7965	+	73	0.766	73	31.4	3	10.45	4.13e-21	0.91
ENSGACG00000000057	scaffold_422-3	scaffold_422	18055	18251	+	41	0.804	42	17.6	1	17.61	1.09e-15	0.96
ENSGACG00000000057	scaffold_422-4	scaffold_422	17260	17456	+	29	0.742	30	12.5	2	6.23	1.36e-06	0.9
ENSGACG00000000057	scaffold_422-5	scaffold_422	11524	11720	+	28	0.75	28	12	3	4.01	7.14e-05	0.94
ENSGACG00000000057	scaffold_422-7	scaffold_422	9247	9443	+	20	0.692	22	8.6	0.5	17.18	5.88e-08	0.91
ENSGACG00000000059	scaffold_99-1	scaffold_99	14434	14630	+	124	0.656	125	53.3	3	17.75	2.39e-46	0.85
ENSGACG00000000059	scaffold_99-14	scaffold_99	27405	27601	+	54	0.718	56	23.2	2	11.6	4.79e-17	0.9
ENSGACG00000000059	scaffold_99-47	scaffold_99	18517	18713	+	23	0.727	25	9.9	0.5	19.76	3.26e-09	1.04
ENSGACG00000000059	scaffold_99-48	scaffold_99	19270	19466	+	23	0.657	25	10.7	2	5.37	4.65e-05	0.91
ENSGACG00000000060	scaffold_99-14	scaffold_99	27405	27601	+	54	0.718	56	23.2	2	11.6	4.79e-17	0.9
ENSGACG00000000060	scaffold_99-12	scaffold_99	39061	39257	+	59	0.711	59	25.3	3	8.45	3.07e-15	0.9
ENSGACG00000000060	scaffold_99-69	scaffold_99	41073	41269	+	21	0.692	21	9	0.5	18.04	3.26e-09	0.91
ENSGACG00000000061	scaffold_99-69	scaffold_99	41073	41269	+	21	0.692	21	9	0.5	18.04	3.26e-09	0.91
ENSGACG00000000061	scaffold_99-2	scaffold_99	45651	45847	+	123	0.819	118	53.3	4	13.31	3.75e-40	0.94
ENSGACG00000000061	scaffold_99-7	scaffold_99	41820	42016	+	69	0.544	67	29.6	7	4.23	4.32e-10	1
ENSGACG00000000062	scaffold_99-2	scaffold_99	45651	45847	+	123	0.819	118	53.3	4	13.31	3.75e-40	0.94
ENSGACG00000000062	scaffold_99-3	scaffold_99	46099	46295	+	100	0.736	100	43.4	7	6.2	3.92e-20	0.88
ENSGACG00000000062	scaffold_99-25	scaffold_99	46776	46972	+	35	0.66	35	15	3	5.01	6.7e-07	0.9
ENSGACG00000000062	scaffold_99-30	scaffold_99	50292	50488	+	30	0.711	31	12.9	1	12.89	8.32e-10	0.93
ENSGACG00000000062	scaffold_99-51	scaffold_99	52729	52925	+	24	0.632	24	10.3	2	5.15	4.65e-05	0.99
ENSGACG00000000063	scaffold_99-30	scaffold_99	50292	50488	+	30	0.711	31	12.9	1	12.89	8.32e-10	0.93
ENSGACG00000000063	scaffold_99-51	scaffold_99	52729	52925	+	24	0.632	24	10.3	2	5.15	4.65e-05	0.99
ENSGACG00000000063	scaffold_99-13	scaffold_99	84031	84227	+	55	0.61	57	23.6	1	23.62	1.48e-23	0.88
ENSGACG00000000063	scaffold_99-23	scaffold_99	84687	84883	+	41	0.529	41	17.6	5	3.52	1.99e-05	0.91
ENSGACG00000000063	scaffold_99-77	scaffold_99	92248	92444	+	16	0.75	19	7.3	1	7.3	8.32e-05	0.97
ENSGACG00000000064	scaffold_99-78	scaffold_99	137897	138093	+	18	0.655	19	7.7	0.5	15.46	9.4e-07	0.91
ENSGACG00000000065	scaffold_99-33	scaffold_99	161594	161790	+	28	0.583	29	12	2	6.01	1.36e-06	0.97
ENSGACG00000000069	scaffold_99-10	scaffold_99	201378	201574	+	62	0.703	62	26.6	7	3.8	2.85e-08	0.9
ENSGACG00000000069	scaffold_99-18	scaffold_99	192135	192331	+	47	0.71	48	20.2	3	6.73	8.31e-11	0.9
ENSGACG00000000069	scaffold_99-44	scaffold_99	193483	193679	+	24	0.824	26	10.3	1	10.31	1.11e-07	1.04
ENSGACG00000000070	scaffold_99-10	scaffold_99	201378	201574	+	62	0.703	62	26.6	7	3.8	2.85e-08	0.9
ENSGACG00000000070	scaffold_99-18	scaffold_99	192135	192331	+	47	0.71	48	20.2	3	6.73	8.31e-11	0.9
ENSGACG00000000070	scaffold_99-44	scaffold_99	193483	193679	+	24	0.824	26	10.3	1	10.31	1.11e-07	1.04
ENSGACG00000000075	scaffold_99-10	scaffold_99	201378	201574	+	62	0.703	62	26.6	7	3.8	2.85e-08	0.9
ENSGACG00000000075	scaffold_99-27	scaffold_99	210309	210505	+	31	0.711	32	13.3	3	4.44	1.61e-05	0.9
ENSGACG00000000075	scaffold_99-31	scaffold_99	246165	246361	+	30	0.641	31	12.9	1	12.89	8.32e-10	0.97
ENSGACG00000000075	scaffold_99-35	scaffold_99	244637	244833	+	28	0.714	29	12	2	6.01	1.36e-06	0.9
ENSGACG00000000075	scaffold_99-40	scaffold_99	209796	209992	+	26	0.515	27	11.6	0.5	23.19	7.42e-12	0.94
ENSGACG00000000075	scaffold_99-49	scaffold_99	243332	243528	+	25	0.694	25	10.7	1	10.74	1.11e-07	0.98
ENSGACG00000000075	scaffold_99-73	scaffold_99	220323	220519	+	20	0.543	20	8.6	0.5	17.18	5.88e-08	1.01
ENSGACG00000000078	scaffold_95-6	scaffold_95	170545	170741	+	65	0.81	65	27.9	6	4.65	2.96e-10	0.96
ENSGACG00000000079	scaffold_99-11	scaffold_99	249908	250104	+	60	0.906	61	25.8	3	8.59	3.07e-15	0.9
ENSGACG00000000079	scaffold_99-31	scaffold_99	246165	246361	+	30	0.641	31	12.9	1	12.89	8.32e-10	0.97
ENSGACG00000000079	scaffold_99-35	scaffold_99	244637	244833	+	28	0.714	29	12	2	6.01	1.36e-06	0.9
ENSGACG00000000079	scaffold_99-49	scaffold_99	243332	243528	+	25	0.694	25	10.7	1	10.74	1.11e-07	0.98
ENSGACG00000000079	scaffold_99-86	scaffold_99	249448	249644	+	17	0.944	17	7.3	1	7.3	8.32e-05	0.91
ENSGACG00000000079	scaffold_99-22	scaffold_99	273107	273303	+	42	0.709	42	18	3	6.01	3.57e-09	0.93
ENSGACG00000000080	scaffold_58-6	scaffold_58	487677	487873	+	86	0.563	86	36.9	3	12.31	2.19e-26	0.88
ENSGACG00000000080	scaffold_58-7	scaffold_58	488554	488750	+	70	0.653	72	30.1	5	6.01	2.82e-14	0.88
ENSGACG00000000081	scaffold_99-6	scaffold_99	301370	301566	+	75	0.673	75	32.6	7	4.66	4.85e-12	0.89
ENSGACG00000000081	scaffold_99-20	scaffold_99	300660	300856	+	41	0.724	45	17.6	1	17.61	1.09e-15	0.89
ENSGACG00000000083	scaffold_58-14	scaffold_58	497709	497905	+	33	0.729	36	14.6	1	14.6	4.52e-12	0.96
ENSGACG00000000084	scaffold_99-6	scaffold_99	301370	301566	+	75	0.673	75	32.6	7	4.66	4.85e-12	0.89
ENSGACG00000000084	scaffold_99-20	scaffold_99	300660	300856	+	41	0.724	45	17.6	1	17.61	1.09e-15	0.89
ENSGACG00000000084	scaffold_99-4	scaffold_99	338912	339108	+	82	0.664	82	35.2	4	8.8	2.35e-21	0.86
ENSGACG00000000084	scaffold_99-9	scaffold_99	338477	338673	+	61	0.61	64	26.2	2	13.1	2.43e-20	0.85
ENSGACG00000000084	scaffold_99-19	scaffold_99	327710	327906	+	42	0.638	46	18	2	9.02	6.19e-12	0.86
ENSGACG00000000084	scaffold_99-46	scaffold_99	314039	314235	+	26	0.622	26	11.2	2	5.58	8.31e-06	0.94
ENSGACG00000000084	scaffold_99-55	scaffold_99	303589	303785	+	24	0.553	24	10.3	2	5.15	4.65e-05	0.91
ENSGACG00000000084	scaffold_99-87	scaffold_99	319325	319521	+	17	0.762	17	7.3	1	7.3	8.32e-05	0.96
ENSGACG00000000084	scaffold_99-88	scaffold_99	328461	328657	+	17	0.75	17	7.3	1	7.3	8.32e-05	0.91
ENSGACG00000000085	scaffold_58-14	scaffold_58	497709	497905	+	33	0.729	36	14.6	1	14.6	4.52e-12	0.96
ENSGACG00000000085	scaffold_58-9	scaffold_58	498225	498421	+	64	0.721	62	27.5	6	4.58	2.96e-10	0.99
ENSGACG00000000086	scaffold_99-4	scaffold_99	338912	339108	+	82	0.664	82	35.2	4	8.8	2.35e-21	0.86
ENSGACG00000000086	scaffold_99-9	scaffold_99	338477	338673	+	61	0.61	64	26.2	2	13.1	2.43e-20	0.85
ENSGACG00000000086	scaffold_99-15	scaffold_99	348939	349135	+	57	0.701	56	24.5	6	4.08	2.48e-08	0.89
ENSGACG00000000087	scaffold_95-11	scaffold_95	206693	206889	+	53	0.786	54	22.8	2	11.38	5.53e-16	0.92
ENSGACG00000000087	scaffold_95-20	scaffold_95	214236	214432	+	29	0.562	32	12.5	1	12.46	8.32e-10	0.93
ENSGACG00000000089	scaffold_99-15	scaffold_99	348939	349135	+	57	0.701	56	24.5	6	4.08	2.48e-08	0.89
ENSGACG00000000089	scaffold_99-24	scaffold_99	365442	365638	+	34	0.755	36	14.6	3	4.87	3.4e-06	0.87
ENSGACG00000000090	scaffold_99-24	scaffold_99	365442	365638	+	34	0.755	36	14.6	3	4.87	3.4e-06	0.87
ENSGACG00000000092	scaffold_58-3	scaffold_58	551273	551469	+	112	0.811	111	48.1	7	6.87	3.14e-24	0.84
ENSGACG00000000096	scaffold_58-4	scaffold_58	628406	628602	+	106	0.61	106	45.5	9	5.06	1.12e-17	0.88
ENSGACG00000000098	scaffold_95-20	scaffold_95	214236	214432	+	29	0.562	32	12.5	1	12.46	8.32e-10	0.93
ENSGACG00000000098	scaffold_95-7	scaffold_95	240546	240742	+	62	0.66	64	26.6	3	8.88	3.53e-16	0.93
ENSGACG00000000100	scaffold_95-7	scaffold_95	240546	240742	+	62	0.66	64	26.6	3	8.88	3.53e-16	0.93
ENSGACG00000000101	scaffold_165-1	scaffold_165	49533	49729	+	44	0.618	45	18.9	2	9.45	6.19e-12	0.95
ENSGACG00000000101	scaffold_165-2	scaffold_165	48889	49085	+	42	0.542	44	18	2	9.02	6.19e-12	0.88
ENSGACG00000000101	scaffold_165-5	scaffold_165	58470	58666	+	19	0.72	19	8.2	1	8.16	1.02e-05	1.01
ENSGACG00000000102	scaffold_95-1	scaffold_95	265597	265793	+	159	0.876	152	68.7	4	17.18	6.83e-58	0.87
ENSGACG00000000103	scaffold_58-1	scaffold_58	714576	714772	+	367	0.542	340	159.3	1	159.35	1.26e-283	0.67
ENSGACG00000000103	scaffold_58-2	scaffold_58	715579	715775	+	173	0.653	175	74.7	5	14.95	1.16e-58	0.78
ENSGACG00000000103	scaffold_58-10	scaffold_58	716715	716911	+	55	0.792	55	23.6	4	5.91	5.97e-11	0.88
ENSGACG00000000103	scaffold_58-13	scaffold_58	713439	713635	+	38	0.656	38	16.3	1	16.32	1.87e-14	0.89
ENSGACG00000000103	scaffold_58-15	scaffold_58	716228	716424	+	22	0.606	24	9.4	0.5	18.9	3.26e-09	0.91
ENSGACG00000000104	scaffold_95-1	scaffold_95	265597	265793	+	159	0.876	152	68.7	4	17.18	6.83e-58	0.87
ENSGACG00000000104	scaffold_95-8	scaffold_95	283490	283686	+	59	0.682	61	25.3	5	5.07	1.6e-10	0.89
ENSGACG00000000105	scaffold_95-8	scaffold_95	283490	283686	+	59	0.682	61	25.3	5	5.07	1.6e-10	0.89
ENSGACG00000000105	scaffold_95-2	scaffold_95	295944	296140	+	87	0.727	87	37.4	4	9.34	2.81e-23	0.89
ENSGACG00000000105	scaffold_95-14	scaffold_95	299264	299460	+	41	0.627	42	17.6	2	8.8	5.61e-11	0.89
ENSGACG00000000105	scaffold_95-24	scaffold_95	325304	325500	+	25	0.667	26	10.7	1	10.74	1.11e-07	0.95
ENSGACG00000000105	scaffold_95-30	scaffold_95	323361	323557	+	19	0.5	20	8.2	1	8.16	1.02e-05	0.96
ENSGACG00000000106	scaffold_343-1	scaffold_343	11576	11772	+	50	0.754	52	21.5	6	3.58	1.46e-06	0.89
ENSGACG00000000106	scaffold_343-2	scaffold_343	14685	14881	+	28	0.694	29	12	1	12.03	8.32e-10	0.94
ENSGACG00000000108	scaffold_95-4	scaffold_95	334542	334738	+	77	0.685	80	33.9	1	33.93	4.36e-38	0.9
ENSGACG00000000108	scaffold_95-9	scaffold_95	333976	334172	+	58	0.591	58	24.9	1	24.91	6.18e-25	0.86
ENSGACG00000000108	scaffold_95-24	scaffold_95	325304	325500	+	25	0.667	26	10.7	1	10.74	1.11e-07	0.95
ENSGACG00000000108	scaffold_95-26	scaffold_95	332995	333191	+	25	0.719	25	10.7	2	5.37	4.65e-05	0.98
ENSGACG00000000108	scaffold_95-28	scaffold_95	340220	340416	+	21	0.567	23	9	1	9.02	1.13e-06	1
ENSGACG00000000108	scaffold_95-13	scaffold_95	367533	367729	+	40	0.677	45	17.2	0.5	34.36	1.3e-20	0.94
ENSGACG00000000108	scaffold_95-34	scaffold_95	366862	367058	+	17	0.6	17	7.3	0.5	14.6	9.4e-07	0.91
ENSGACG00000000111	scaffold_95-17	scaffold_95	378506	378702	+	33	0.577	35	14.2	0.5	28.35	4.25e-16	0.93
ENSGACG00000000116	scaffold_58-12	scaffold_58	798177	798373	+	45	0.978	45	19.3	2	9.66	6.48e-13	1.05
ENSGACG00000000159	scaffold_216-4	scaffold_216	33471	33667	+	60	0.672	59	25.8	6	4.3	5.89e-09	0.93
ENSGACG00000000159	scaffold_216-6	scaffold_216	17115	17311	+	41	0.776	41	17.6	5	3.52	1.99e-05	0.91
ENSGACG00000000159	scaffold_216-11	scaffold_216	35584	35780	+	21	0.758	23	9	0.5	18.04	3.26e-09	0.95
ENSGACG00000000160	scaffold_216-4	scaffold_216	33471	33667	+	60	0.672	59	25.8	6	4.3	5.89e-09	0.93
ENSGACG00000000160	scaffold_216-11	scaffold_216	35584	35780	+	21	0.758	23	9	0.5	18.04	3.26e-09	0.95
ENSGACG00000000160	scaffold_216-1	scaffold_216	36408	36604	+	84	0.766	88	36.1	4	9.02	2.61e-22	0.92
ENSGACG00000000160	scaffold_216-5	scaffold_216	40075	40271	+	47	0.589	47	20.2	2	10.09	6.44e-14	0.92
ENSGACG00000000161	scaffold_216-5	scaffold_216	40075	40271	+	47	0.589	47	20.2	2	10.09	6.44e-14	0.92
ENSGACG00000000161	scaffold_216-2	scaffold_216	48095	48291	+	82	0.717	83	35.2	5	7.04	2.2e-18	0.93
ENSGACG00000000161	scaffold_216-3	scaffold_216	43719	43915	+	73	0.684	74	31.4	5	6.27	4.52e-15	0.87
ENSGACG00000000161	scaffold_216-9	scaffold_216	54748	54944	+	29	0.818	29	12.5	1	12.46	8.32e-10	0.97
ENSGACG00000000162	scaffold_216-2	scaffold_216	48095	48291	+	82	0.717	83	35.2	5	7.04	2.2e-18	0.93
ENSGACG00000000162	scaffold_216-9	scaffold_216	54748	54944	+	29	0.818	29	12.5	1	12.46	8.32e-10	0.97
ENSGACG00000000164	scaffold_324-2	scaffold_324	1070	1266	+	55	0.81	58	24.5	7	3.5	3.89e-07	0.91
ENSGACG00000000164	scaffold_324-5	scaffold_324	4842	5038	+	24	0.862	26	10.3	0.5	20.62	1.63e-10	1.04
ENSGACG00000000165	scaffold_324-1	scaffold_324	10372	10568	+	68	0.957	67	29.2	2	14.6	8.8e-24	0.96
ENSGACG00000000168	scaffold_324-3	scaffold_324	23824	24020	+	43	0.657	45	18.5	5	3.69	5.42e-06	0.88
ENSGACG00000000168	scaffold_324-6	scaffold_324	22832	23028	+	24	0.96	24	10.3	0.5	20.62	1.63e-10	0.95
ENSGACG00000000176	scaffold_944-1	scaffold_944	670	866	+	33	0.806	33	14.2	0.5	28.35	4.25e-16	0.93
ENSGACG00000000185	scaffold_713-1	scaffold_713	7296	7492	+	26	0.644	29	11.2	2	5.58	8.31e-06	0.91
ENSGACG00000000186	scaffold_1115-1	scaffold_1115	3015	3211	+	38	0.776	38	16.3	2	8.16	4.8e-10	0.87
ENSGACG00000000191	scaffold_195-4	scaffold_195	27954	28150	+	36	0.633	36	15.5	3	5.15	6.7e-07	0.95
ENSGACG00000000195	scaffold_195-11	scaffold_195	77607	77803	+	23	0.774	26	9.9	1	9.88	1.13e-06	0.95
ENSGACG00000000196	scaffold_198-1	scaffold_198	100132	100328	+	113	0.671	108	49	6	8.16	5.11e-27	0.92
ENSGACG00000000196	scaffold_198-3	scaffold_198	101176	101372	+	49	0.683	48	21	2	10.52	6.11e-15	0.95
ENSGACG00000000196	scaffold_198-4	scaffold_198	100719	100915	+	38	0.768	41	16.3	0.5	32.64	4.42e-19	0.92
ENSGACG00000000196	scaffold_198-5	scaffold_198	102934	103130	+	30	0.588	33	12.9	3	4.3	7.14e-05	0.93
ENSGACG00000000196	scaffold_198-2	scaffold_198	105683	105879	+	50	0.845	52	21.5	3	7.16	1.18e-11	0.93
ENSGACG00000000198	scaffold_195-2	scaffold_195	141426	141622	+	53	0.767	53	22.8	4	5.69	3.46e-10	0.96
ENSGACG00000000206	scaffold_175-16	scaffold_175	15461	15657	+	24	0.625	24	10.3	2	5.15	4.65e-05	0.95
ENSGACG00000000209	scaffold_175-4	scaffold_175	46205	46401	+	58	0.684	60	24.9	4	6.23	9.88e-12	0.98
ENSGACG00000000209	scaffold_175-9	scaffold_175	83259	83455	+	32	0.653	33	13.7	2	6.87	2.07e-07	0.99
ENSGACG00000000216	scaffold_524-1	scaffold_524	7542	7738	+	56	0.754	56	24.1	1	24.05	6.18e-25	0.95
ENSGACG00000000225	scaffold_175-3	scaffold_175	114445	114641	+	82	0.694	82	35.2	7	5.03	4.14e-14	0.85
ENSGACG00000000225	scaffold_175-5	scaffold_175	108653	108849	+	55	0.589	56	24.1	3	8.02	2.57e-14	0.93
ENSGACG00000000225	scaffold_175-7	scaffold_175	115216	115412	+	34	0.744	35	15	4	3.76	1.99e-05	0.93
ENSGACG00000000226	scaffold_238-2	scaffold_238	6872	7068	+	35	0.861	35	15	0.5	30.07	1.42e-17	0.92
ENSGACG00000000227	scaffold_238-2	scaffold_238	6872	7068	+	35	0.861	35	15	0.5	30.07	1.42e-17	0.92
ENSGACG00000000230	scaffold_175-7	scaffold_175	115216	115412	+	34	0.744	35	15	4	3.76	1.99e-05	0.93
ENSGACG00000000232	scaffold_238-1	scaffold_238	41487	41683	+	47	0.698	48	20.2	6	3.36	5.18e-06	0.92
ENSGACG00000000235	scaffold_69-3	scaffold_69	10321	10517	+	131	0.615	131	56.3	3	18.76	3.87e-50	0.81
ENSGACG00000000235	scaffold_69-13	scaffold_69	19662	19858	+	41	0.826	44	17.6	0.5	35.22	1.3e-20	0.93
ENSGACG00000000235	scaffold_69-14	scaffold_69	19217	19413	+	39	0.706	42	16.8	3	5.58	1.24e-07	0.94
ENSGACG00000000235	scaffold_69-36	scaffold_69	1446	1642	+	18	0.63	18	7.7	0.5	15.46	9.4e-07	0.91
ENSGACG00000000236	scaffold_402-1	scaffold_402	8844	9040	+	92	0.713	91	40.4	7	5.77	8.57e-18	0.89
ENSGACG00000000236	scaffold_402-2	scaffold_402	5742	5938	+	24	0.852	25	10.3	2	5.15	4.65e-05	0.91
ENSGACG00000000237	scaffold_402-1	scaffold_402	8844	9040	+	92	0.713	91	40.4	7	5.77	8.57e-18	0.89
ENSGACG00000000237	scaffold_402-2	scaffold_402	5742	5938	+	24	0.852	25	10.3	2	5.15	4.65e-05	0.91
ENSGACG00000000243	scaffold_69-13	scaffold_69	19662	19858	+	41	0.826	44	17.6	0.5	35.22	1.3e-20	0.93
ENSGACG00000000245	scaffold_369-2	scaffold_369	7110	7306	+	46	0.763	49	19.8	1	19.76	3.18e-18	0.9
ENSGACG00000000245	scaffold_369-4	scaffold_369	14453	14649	+	25	0.741	26	10.7	1	10.74	1.11e-07	0.94
ENSGACG00000000245	scaffold_369-5	scaffold_369	10883	11079	+	22	0.645	24	9.4	0.5	18.9	3.26e-09	0.95
ENSGACG00000000246	scaffold_175-2	scaffold_175	144101	144297	+	88	0.802	87	37.8	6	6.3	1.32e-17	0.93
ENSGACG00000000246	scaffold_175-14	scaffold_175	130871	131067	+	28	0.897	28	12	1	12.03	8.32e-10	0.94
ENSGACG00000000246	scaffold_175-11	scaffold_175	131388	131584	+	28	0.718	29	12	2	6.01	1.36e-06	0.9
ENSGACG00000000250	scaffold_69-8	scaffold_69	44224	44420	+	75	0.653	77	32.6	2	16.32	2.35e-27	0.83
ENSGACG00000000250	scaffold_69-11	scaffold_69	45260	45456	+	58	0.711	59	24.9	2	12.46	3.98e-18	0.9
ENSGACG00000000251	scaffold_175-2	scaffold_175	144101	144297	+	88	0.802	87	37.8	6	6.3	1.32e-17	0.93
ENSGACG00000000251	scaffold_175-14	scaffold_175	130871	131067	+	28	0.897	28	12	1	12.03	8.32e-10	0.94
ENSGACG00000000251	scaffold_175-11	scaffold_175	131388	131584	+	28	0.718	29	12	2	6.01	1.36e-06	0.9
ENSGACG00000000251	scaffold_175-1	scaffold_175	144723	144919	+	93	0.633	96	39.9	3	13.31	1.07e-29	0.89
ENSGACG00000000252	scaffold_175-8	scaffold_175	162055	162251	+	33	0.721	34	14.2	4	3.54	7.63e-05	0.93
ENSGACG00000000252	scaffold_175-12	scaffold_175	161445	161641	+	28	0.676	29	12	3	4.01	7.14e-05	0.94
ENSGACG00000000252	scaffold_175-19	scaffold_175	160945	161141	+	21	0.595	24	9	1	9.02	1.13e-06	0.95
ENSGACG00000000252	scaffold_175-23	scaffold_175	163066	163262	+	18	0.727	19	7.7	1	7.73	8.32e-05	1.09
ENSGACG00000000254	scaffold_369-1	scaffold_369	21930	22126	+	60	0.667	62	25.8	2	12.89	3.17e-19	1.03
ENSGACG00000000255	scaffold_69-11	scaffold_69	45260	45456	+	58	0.711	59	24.9	2	12.46	3.98e-18	0.9
ENSGACG00000000255	scaffold_69-4	scaffold_69	47550	47746	+	107	0.805	107	46	2	22.98	4.16e-44	0.81
ENSGACG00000000257	scaffold_69-1	scaffold_69	58342	58538	+	193	0.82	189	82.9	3	27.63	1.45e-85	0.83
ENSGACG00000000260	scaffold_69-5	scaffold_69	83816	84012	+	96	0.84	100	41.2	5	8.25	1.04e-23	0.87
ENSGACG00000000260	scaffold_69-17	scaffold_69	113183	113379	+	37	0.685	39	15.9	2	7.95	3.87e-09	0.87
ENSGACG00000000261	scaffold_175-8	scaffold_175	162055	162251	+	33	0.721	34	14.2	4	3.54	7.63e-05	0.93
ENSGACG00000000261	scaffold_175-12	scaffold_175	161445	161641	+	28	0.676	29	12	3	4.01	7.14e-05	0.94
ENSGACG00000000261	scaffold_175-19	scaffold_175	160945	161141	+	21	0.595	24	9	1	9.02	1.13e-06	0.95
ENSGACG00000000261	scaffold_175-23	scaffold_175	163066	163262	+	18	0.727	19	7.7	1	7.73	8.32e-05	1.09
ENSGACG00000000261	scaffold_175-13	scaffold_175	170340	170536	+	28	0.647	29	12	3	4.01	7.14e-05	0.97
ENSGACG00000000262	scaffold_114-3	scaffold_114	115635	115831	+	67	0.58	71	29.6	6	4.94	1.29e-11	0.88
ENSGACG00000000264	scaffold_69-17	scaffold_69	113183	113379	+	37	0.685	39	15.9	2	7.95	3.87e-09	0.87
ENSGACG00000000269	scaffold_69-6	scaffold_69	141385	141581	+	97	0.642	98	41.7	9	4.63	6.24e-15	0.87
ENSGACG00000000269	scaffold_69-19	scaffold_69	148060	148256	+	33	0.941	32	14.2	2	7.09	2.93e-08	0.96
ENSGACG00000000269	scaffold_69-23	scaffold_69	139395	139591	+	26	0.867	26	11.2	0.5	22.33	7.42e-12	0.94
ENSGACG00000000269	scaffold_69-33	scaffold_69	145482	145678	+	20	0.792	20	8.6	0.5	17.18	5.88e-08	1.01
ENSGACG00000000271	scaffold_69-21	scaffold_69	192652	192848	+	25	0.622	27	10.7	1	10.74	1.11e-07	0.94
ENSGACG00000000271	scaffold_69-38	scaffold_69	186400	186596	+	18	0.947	18	7.7	0.5	15.46	9.4e-07	0.91
ENSGACG00000000273	scaffold_114-12	scaffold_114	196628	196824	+	27	0.694	28	11.6	2	5.8	8.31e-06	0.94
ENSGACG00000000273	scaffold_114-17	scaffold_114	188947	189143	+	22	0.846	23	9.4	1	9.45	1.13e-06	1
ENSGACG00000000274	scaffold_69-21	scaffold_69	192652	192848	+	25	0.622	27	10.7	1	10.74	1.11e-07	0.94
ENSGACG00000000278	scaffold_114-12	scaffold_114	196628	196824	+	27	0.694	28	11.6	2	5.8	8.31e-06	0.94
ENSGACG00000000278	scaffold_114-13	scaffold_114	209173	209369	+	26	0.625	27	11.2	1	11.17	1e-08	0.98
ENSGACG00000000278	scaffold_114-18	scaffold_114	222280	222476	+	17	0.667	19	7.3	0.5	14.6	9.4e-07	0.91
ENSGACG00000000280	scaffold_114-4	scaffold_114	227162	227358	+	65	0.658	68	27.9	2	13.96	1.8e-21	0.98
ENSGACG00000000280	scaffold_114-16	scaffold_114	226030	226226	+	25	0.962	24	10.7	0.5	21.48	1.63e-10	1.13
ENSGACG00000000280	scaffold_114-18	scaffold_114	222280	222476	+	17	0.667	19	7.3	0.5	14.6	9.4e-07	0.91
ENSGACG00000000280	scaffold_114-1	scaffold_114	276465	276661	+	104	0.767	102	45.1	4	11.27	2.08e-31	0.94
ENSGACG00000000281	scaffold_114-1	scaffold_114	276465	276661	+	104	0.767	102	45.1	4	11.27	2.08e-31	0.94
ENSGACG00000000281	scaffold_114-2	scaffold_114	277352	277548	+	97	0.703	95	41.7	2	20.83	9.34e-39	0.9
ENSGACG00000000286	scaffold_114-6	scaffold_114	306097	306293	+	51	0.746	52	21.9	2	10.95	6.11e-15	0.93
ENSGACG00000000286	scaffold_114-7	scaffold_114	314102	314298	+	51	0.788	51	21.9	3	7.3	1.18e-11	0.91
ENSGACG00000000288	scaffold_114-5	scaffold_114	326059	326255	+	61	0.925	62	26.2	6	4.37	1.34e-09	0.95
ENSGACG00000000289	scaffold_69-12	scaffold_69	396544	396740	+	49	0.81	49	21	5	4.21	8.11e-08	0.93
ENSGACG00000000290	scaffold_114-5	scaffold_114	326059	326255	+	61	0.925	62	26.2	6	4.37	1.34e-09	0.95
ENSGACG00000000290	scaffold_114-11	scaffold_114	342540	342736	+	30	0.8	32	12.9	3	4.3	7.14e-05	0.97
ENSGACG00000000291	scaffold_69-10	scaffold_69	416146	416342	+	70	0.721	72	30.1	5	6.01	2.82e-14	0.84
ENSGACG00000000293	scaffold_114-11	scaffold_114	342540	342736	+	30	0.8	32	12.9	3	4.3	7.14e-05	0.97
ENSGACG00000000293	scaffold_114-8	scaffold_114	348504	348700	+	37	0.72	38	15.9	3	5.3	6.7e-07	0.92
ENSGACG00000000294	scaffold_69-15	scaffold_69	446149	446345	+	42	0.709	42	18	5	3.61	5.42e-06	0.93
ENSGACG00000000295	scaffold_114-8	scaffold_114	348504	348700	+	37	0.72	38	15.9	3	5.3	6.7e-07	0.92
ENSGACG00000000299	scaffold_69-15	scaffold_69	446149	446345	+	42	0.709	42	18	5	3.61	5.42e-06	0.93
ENSGACG00000000302	scaffold_27-183	scaffold_27	36156	36352	+	44	0.653	47	18.9	6	3.15	5.69e-05	0.9
ENSGACG00000000306	scaffold_69-16	scaffold_69	672217	672413	+	39	0.569	41	16.8	3	5.58	1.24e-07	0.91
ENSGACG00000000306	scaffold_69-28	scaffold_69	643162	643358	+	22	0.733	23	9.4	0.5	18.9	3.26e-09	0.95
ENSGACG00000000307	scaffold_27-337	scaffold_27	51908	52104	+	29	0.694	29	12.5	3	4.15	7.14e-05	0.93
ENSGACG00000000309	scaffold_27-61	scaffold_27	83736	83932	+	75	0.755	77	32.2	4	8.05	1.46e-18	0.88
ENSGACG00000000309	scaffold_27-263	scaffold_27	84629	84825	+	32	0.685	36	13.7	3	4.58	1.61e-05	0.93
ENSGACG00000000310	scaffold_69-16	scaffold_69	672217	672413	+	39	0.569	41	16.8	3	5.58	1.24e-07	0.91
ENSGACG00000000310	scaffold_69-20	scaffold_69	694561	694757	+	25	0.722	28	10.7	2	5.37	4.65e-05	0.91
ENSGACG00000000310	scaffold_69-29	scaffold_69	676238	676434	+	22	0.6	23	9.4	0.5	18.9	3.26e-09	0.95
ENSGACG00000000310	scaffold_69-32	scaffold_69	693942	694138	+	21	0.667	21	9	1	9.02	1.13e-06	0.91
ENSGACG00000000311	scaffold_69-9	scaffold_69	756424	756620	+	71	0.779	75	30.5	3	10.16	4.28e-20	0.99
ENSGACG00000000311	scaffold_69-2	scaffold_69	762609	762805	+	187	0.68	180	80.3	3	26.77	1.07e-82	0.84
ENSGACG00000000311	scaffold_69-7	scaffold_69	780824	781020	+	92	0.792	93	39.5	8	4.94	3.41e-15	0.89
ENSGACG00000000312	scaffold_27-3	scaffold_27	94200	94396	+	187	0.67	184	80.7	1	80.75	5.2e-120	0.8
ENSGACG00000000313	scaffold_27-3	scaffold_27	94200	94396	+	187	0.67	184	80.7	1	80.75	5.2e-120	0.8
ENSGACG00000000314	scaffold_131-4	scaffold_131	23266	23462	+	52	0.806	52	22.3	2	11.17	5.53e-16	0.87
ENSGACG00000000314	scaffold_131-5	scaffold_131	14908	15104	+	50	0.793	50	21.5	2	10.74	6.11e-15	0.95
ENSGACG00000000314	scaffold_131-6	scaffold_131	24317	24513	+	38	0.796	45	16.3	1	16.32	1.87e-14	1
ENSGACG00000000314	scaffold_131-15	scaffold_131	24972	25168	+	17	0.64	19	7.7	0.5	15.46	9.4e-07	0.91
ENSGACG00000000316	scaffold_27-3	scaffold_27	94200	94396	+	187	0.67	184	80.7	1	80.75	5.2e-120	0.8
ENSGACG00000000316	scaffold_27-157	scaffold_27	105371	105567	+	49	0.608	50	21.5	7	3.07	1.45e-05	1
ENSGACG00000000316	scaffold_27-282	scaffold_27	102266	102462	+	34	0.667	34	14.6	2	7.3	2.93e-08	0.87
ENSGACG00000000316	scaffold_27-371	scaffold_27	104704	104900	+	26	0.722	27	11.2	1	11.17	1e-08	0.94
ENSGACG00000000317	scaffold_69-7	scaffold_69	780824	781020	+	92	0.792	93	39.5	8	4.94	3.41e-15	0.89
ENSGACG00000000318	scaffold_131-4	scaffold_131	23266	23462	+	52	0.806	52	22.3	2	11.17	5.53e-16	0.87
ENSGACG00000000318	scaffold_131-6	scaffold_131	24317	24513	+	38	0.796	45	16.3	1	16.32	1.87e-14	1
ENSGACG00000000318	scaffold_131-15	scaffold_131	24972	25168	+	17	0.64	19	7.7	0.5	15.46	9.4e-07	0.91
ENSGACG00000000319	scaffold_27-157	scaffold_27	105371	105567	+	49	0.608	50	21.5	7	3.07	1.45e-05	1
ENSGACG00000000319	scaffold_27-282	scaffold_27	102266	102462	+	34	0.667	34	14.6	2	7.3	2.93e-08	0.87
ENSGACG00000000319	scaffold_27-371	scaffold_27	104704	104900	+	26	0.722	27	11.2	1	11.17	1e-08	0.94
ENSGACG00000000320	scaffold_131-9	scaffold_131	37880	38076	+	30	0.605	30	12.9	0.5	25.77	3.09e-13	0.9
ENSGACG00000000321	scaffold_168-3	scaffold_168	27785	27981	+	63	0.692	64	27.1	5	5.41	5.6e-12	0.97
ENSGACG00000000321	scaffold_168-6	scaffold_168	39884	40080	+	39	0.59	39	16.8	5	3.35	6.9e-05	1
ENSGACG00000000325	scaffold_131-9	scaffold_131	37880	38076	+	30	0.605	30	12.9	0.5	25.77	3.09e-13	0.9
ENSGACG00000000325	scaffold_131-1	scaffold_131	40686	40882	+	96	0.723	97	41.7	2	20.83	9.34e-39	0.87
ENSGACG00000000325	scaffold_131-2	scaffold_131	39937	40133	+	76	0.761	77	32.6	1	32.64	1.44e-36	0.93
ENSGACG00000000325	scaffold_131-8	scaffold_131	38879	39075	+	33	0.652	33	14.2	3	4.72	3.4e-06	0.93
ENSGACG00000000330	scaffold_131-1	scaffold_131	40686	40882	+	96	0.723	97	41.7	2	20.83	9.34e-39	0.87
ENSGACG00000000330	scaffold_131-2	scaffold_131	39937	40133	+	76	0.761	77	32.6	1	32.64	1.44e-36	0.93
ENSGACG00000000331	scaffold_27-636	scaffold_27	194679	194875	+	18	0.81	18	7.7	0.5	15.46	9.4e-07	0.91
ENSGACG00000000332	scaffold_27-636	scaffold_27	194679	194875	+	18	0.81	18	7.7	0.5	15.46	9.4e-07	0.91
ENSGACG00000000332	scaffold_27-248	scaffold_27	195781	195977	+	35	0.656	38	15	3	5.01	6.7e-07	0.92
ENSGACG00000000334	scaffold_168-6	scaffold_168	39884	40080	+	39	0.59	39	16.8	5	3.35	6.9e-05	1
ENSGACG00000000339	scaffold_1158-1	scaffold_1158	5451	5589	+	20	0.905	20	8.6	0.5	17.18	5.88e-08	0.96
ENSGACG00000000342	scaffold_168-1	scaffold_168	71019	71215	+	66	0.789	67	28.3	5	5.67	9.93e-13	0.91
ENSGACG00000000342	scaffold_168-4	scaffold_168	69935	70131	+	56	0.576	59	24.1	4	6.01	9.88e-12	0.86
ENSGACG00000000347	scaffold_27-122	scaffold_27	219652	219848	+	55	0.707	58	23.6	3	7.87	2.07e-13	0.95
ENSGACG00000000351	scaffold_168-1	scaffold_168	71019	71215	+	66	0.789	67	28.3	5	5.67	9.93e-13	0.91
ENSGACG00000000353	scaffold_27-71	scaffold_27	289276	289472	+	67	0.582	71	28.8	3	9.59	4.16e-18	0.93
ENSGACG00000000353	scaffold_27-639	scaffold_27	269508	269704	+	17	0.56	18	7.3	1	7.3	8.32e-05	0.91
ENSGACG00000000353	scaffold_27-640	scaffold_27	278770	278966	+	17	0.5	18	7.3	1	7.3	8.32e-05	0.91
ENSGACG00000000353	scaffold_27-690	scaffold_27	287311	287507	+	17	0.68	17	7.3	0.5	14.6	9.4e-07	0.97
ENSGACG00000000353	scaffold_27-689	scaffold_27	275365	275561	+	16	0.56	17	6.9	0.5	13.74	1.32e-05	0.97
ENSGACG00000000357	scaffold_27-71	scaffold_27	289276	289472	+	67	0.582	71	28.8	3	9.59	4.16e-18	0.93
ENSGACG00000000357	scaffold_27-81	scaffold_27	291038	291234	+	69	0.787	69	29.6	6	4.94	1.29e-11	0.86
ENSGACG00000000357	scaffold_27-283	scaffold_27	310178	310374	+	34	0.667	34	14.6	1	14.6	4.52e-12	0.9
ENSGACG00000000365	scaffold_168-11	scaffold_168	112745	112941	+	24	0.806	24	10.3	0.5	20.62	1.63e-10	0.91
ENSGACG00000000366	scaffold_168-11	scaffold_168	112745	112941	+	24	0.806	24	10.3	0.5	20.62	1.63e-10	0.91
ENSGACG00000000369	scaffold_131-11	scaffold_131	171471	171667	+	24	0.889	24	10.3	1	10.31	1.11e-07	1.04
ENSGACG00000000369	scaffold_131-13	scaffold_131	167897	168093	+	23	0.958	23	9.9	1	9.88	1.13e-06	0.95
ENSGACG00000000370	scaffold_131-3	scaffold_131	177443	177639	+	54	0.821	54	23.2	5	4.64	3.91e-09	0.95
ENSGACG00000000371	scaffold_27-45	scaffold_27	612469	612665	+	87	0.731	88	37.4	3	12.46	1.77e-27	0.95
ENSGACG00000000371	scaffold_27-78	scaffold_27	611906	612102	+	67	0.583	70	28.8	4	7.19	5.02e-15	0.93
ENSGACG00000000371	scaffold_27-102	scaffold_27	617550	617746	+	61	0.525	62	26.2	5	5.24	3.05e-11	0.87
ENSGACG00000000371	scaffold_27-143	scaffold_27	618059	618255	+	53	0.536	53	22.8	3	7.59	1.6e-12	0.89
ENSGACG00000000371	scaffold_27-158	scaffold_27	621570	621766	+	48	0.654	50	20.6	6	3.44	5.18e-06	0.96
ENSGACG00000000371	scaffold_27-375	scaffold_27	630254	630450	+	26	0.579	27	11.6	1	11.6	1e-08	0.94
ENSGACG00000000371	scaffold_27-414	scaffold_27	627366	627562	+	24	0.806	25	10.3	2	5.15	4.65e-05	0.95
ENSGACG00000000371	scaffold_27-522	scaffold_27	615050	615246	+	21	0.821	21	9	1	9.02	1.13e-06	0.95
ENSGACG00000000378	scaffold_768-1	scaffold_768	4666	4862	+	42	0.592	45	18	1	18.04	6.06e-17	0.91
ENSGACG00000000383	scaffold_27-106	scaffold_27	694586	694782	+	62	0.613	61	26.6	4	6.66	2.4e-13	0.91
ENSGACG00000000383	scaffold_27-128	scaffold_27	672623	672819	+	57	0.747	57	24.5	4	6.12	9.88e-12	0.94
ENSGACG00000000383	scaffold_27-178	scaffold_27	682807	683003	+	46	0.644	48	19.8	3	6.59	5.59e-10	0.92
ENSGACG00000000383	scaffold_27-203	scaffold_27	688112	688308	+	44	0.632	45	18.9	3	6.3	3.57e-09	0.97
ENSGACG00000000383	scaffold_27-221	scaffold_27	687682	687878	+	40	0.523	42	17.6	3	5.87	2.16e-08	1.02
ENSGACG00000000383	scaffold_27-376	scaffold_27	678212	678408	+	24	0.714	27	10.3	2	5.15	4.65e-05	0.95
ENSGACG00000000385	scaffold_27-106	scaffold_27	694586	694782	+	62	0.613	61	26.6	4	6.66	2.4e-13	0.91
ENSGACG00000000385	scaffold_27-133	scaffold_27	716645	716841	+	55	0.786	56	23.6	5	4.72	3.91e-09	0.95
ENSGACG00000000388	scaffold_27-133	scaffold_27	716645	716841	+	55	0.786	56	23.6	5	4.72	3.91e-09	0.95
ENSGACG00000000392	scaffold_168-2	scaffold_168	145763	145959	+	62	0.762	65	26.6	5	5.33	3.05e-11	0.93
ENSGACG00000000392	scaffold_168-10	scaffold_168	145275	145471	+	25	0.706	26	10.7	2	5.37	4.65e-05	0.91
ENSGACG00000000397	scaffold_27-249	scaffold_27	793081	793277	+	35	0.854	38	15	0.5	30.07	1.42e-17	0.87
ENSGACG00000000399	scaffold_27-249	scaffold_27	793081	793277	+	35	0.854	38	15	0.5	30.07	1.42e-17	0.87
ENSGACG00000000399	scaffold_27-396	scaffold_27	818521	818717	+	25	0.561	26	10.7	2	5.37	4.65e-05	0.91
ENSGACG00000000407	scaffold_168-5	scaffold_168	147342	147538	+	41	0.7	42	17.6	2	8.8	5.61e-11	0.93
ENSGACG00000000411	scaffold_27-123	scaffold_27	820266	820462	+	56	0.718	58	24.1	3	8.02	2.57e-14	0.89
ENSGACG00000000411	scaffold_27-396	scaffold_27	818521	818717	+	25	0.561	26	10.7	2	5.37	4.65e-05	0.91
ENSGACG00000000412	scaffold_27-72	scaffold_27	846368	846564	+	68	0.626	71	29.2	5	5.84	1.7e-13	0.88
ENSGACG00000000412	scaffold_27-646	scaffold_27	839676	839872	+	17	0.533	18	7.3	0.5	14.6	9.4e-07	0.9
ENSGACG00000000419	scaffold_119-3	scaffold_119	229674	229870	+	56	0.651	58	24.1	3	8.02	2.57e-14	0.89
ENSGACG00000000421	scaffold_119-1	scaffold_119	259961	260157	+	95	0.737	99	41.7	9	4.63	6.24e-15	0.88
ENSGACG00000000422	scaffold_119-1	scaffold_119	259961	260157	+	95	0.737	99	41.7	9	4.63	6.24e-15	0.88
ENSGACG00000000425	scaffold_27-190	scaffold_27	869940	870136	+	45	0.742	46	19.3	5	3.87	1.4e-06	0.94
ENSGACG00000000434	scaffold_80-7	scaffold_80	184379	184575	+	56	0.877	57	24.1	6	4.01	2.48e-08	0.91
ENSGACG00000000434	scaffold_80-35	scaffold_80	182794	182990	+	19	0.577	19	8.2	1	8.16	1.02e-05	1.01
ENSGACG00000000436	scaffold_27-46	scaffold_27	875793	875989	+	85	0.649	88	36.9	4	9.23	2.61e-22	0.88
ENSGACG00000000437	scaffold_27-79	scaffold_27	884189	884385	+	67	0.661	70	28.8	2	14.39	1.28e-22	0.87
ENSGACG00000000441	scaffold_27-79	scaffold_27	884189	884385	+	67	0.661	70	28.8	2	14.39	1.28e-22	0.87
ENSGACG00000000441	scaffold_27-124	scaffold_27	892714	892910	+	56	0.677	58	24.5	3	8.16	2.57e-14	0.97
ENSGACG00000000443	scaffold_27-124	scaffold_27	892714	892910	+	56	0.677	58	24.5	3	8.16	2.57e-14	0.97
ENSGACG00000000449	scaffold_27-139	scaffold_27	904749	904945	+	51	0.688	54	21.9	3	7.3	1.18e-11	0.93
ENSGACG00000000450	scaffold_27-139	scaffold_27	904749	904945	+	51	0.688	54	21.9	3	7.3	1.18e-11	0.93
ENSGACG00000000450	scaffold_27-528	scaffold_27	917855	918051	+	19	0.846	21	8.2	1	8.16	1.02e-05	0.91
ENSGACG00000000451	scaffold_27-528	scaffold_27	917855	918051	+	19	0.846	21	8.2	1	8.16	1.02e-05	0.91
ENSGACG00000000452	scaffold_163-5	scaffold_163	56147	56343	+	71	0.811	72	30.5	5	6.1	2.82e-14	0.87
ENSGACG00000000453	scaffold_139-8	scaffold_139	23966	24162	+	51	0.646	54	21.9	2	10.95	6.11e-15	0.95
ENSGACG00000000453	scaffold_139-11	scaffold_139	24671	24867	+	47	0.597	48	20.6	1	20.62	1.59e-19	0.9
ENSGACG00000000453	scaffold_139-14	scaffold_139	19538	19734	+	37	0.615	38	15.9	3	5.3	6.7e-07	0.97
ENSGACG00000000453	scaffold_139-17	scaffold_139	1945	2141	+	33	0.6	34	14.2	0.5	28.35	4.25e-16	0.96
ENSGACG00000000453	scaffold_139-19	scaffold_139	19910	20106	+	29	0.684	30	12.5	1	12.46	8.32e-10	0.93
ENSGACG00000000453	scaffold_139-33	scaffold_139	16309	16505	+	18	0.64	18	7.7	0.5	15.46	9.4e-07	0.96
ENSGACG00000000454	scaffold_139-18	scaffold_139	88640	88836	+	32	0.667	33	13.7	2	6.87	2.07e-07	0.96
ENSGACG00000000455	scaffold_101-4	scaffold_101	1521	1717	+	85	0.7	85	36.5	2	18.25	2.64e-32	0.88
ENSGACG00000000455	scaffold_101-10	scaffold_101	61112	61308	+	61	0.577	63	27.1	3	9.02	3.9e-17	0.91
ENSGACG00000000455	scaffold_101-22	scaffold_101	62063	62259	+	32	0.702	34	13.7	0.5	27.49	1.19e-14	0.99
ENSGACG00000000455	scaffold_101-31	scaffold_101	59545	59741	+	18	0.424	18	7.7	1	7.73	8.32e-05	0.91
ENSGACG00000000457	scaffold_163-6	scaffold_163	84266	84462	+	58	0.763	59	24.9	3	8.3	2.57e-14	0.96
ENSGACG00000000458	scaffold_80-1	scaffold_80	222293	222489	+	245	0.756	239	105.2	2	52.61	5.17e-138	0.77
ENSGACG00000000459	scaffold_163-6	scaffold_163	84266	84462	+	58	0.763	59	24.9	3	8.3	2.57e-14	0.96
ENSGACG00000000460	scaffold_163-7	scaffold_163	97808	98004	+	57	0.732	57	24.5	6	4.08	2.48e-08	0.92
ENSGACG00000000463	scaffold_163-7	scaffold_163	97808	98004	+	57	0.732	57	24.5	6	4.08	2.48e-08	0.92
ENSGACG00000000466	scaffold_139-12	scaffold_139	103957	104153	+	39	0.656	42	17.2	2	8.59	5.61e-11	0.91
ENSGACG00000000467	scaffold_27-107	scaffold_27	966260	966456	+	59	0.722	61	25.3	5	5.07	1.6e-10	0.92
ENSGACG00000000468	scaffold_80-10	scaffold_80	294528	294724	+	50	0.561	50	21.9	3	7.3	1.18e-11	0.91
ENSGACG00000000468	scaffold_80-11	scaffold_80	295420	295616	+	47	0.717	50	20.2	1	20.19	1.59e-19	0.88
ENSGACG00000000468	scaffold_80-24	scaffold_80	293083	293279	+	33	0.789	33	14.2	1	14.17	4.52e-12	0.96
ENSGACG00000000469	scaffold_80-13	scaffold_80	311481	311677	+	43	0.82	43	18.5	2	9.23	6.19e-12	0.95
ENSGACG00000000472	scaffold_27-204	scaffold_27	988560	988756	+	42	0.618	45	18	4	4.51	2.48e-07	0.98
ENSGACG00000000472	scaffold_27-285	scaffold_27	988140	988336	+	33	0.617	34	14.2	3	4.72	3.4e-06	0.93
ENSGACG00000000472	scaffold_27-647	scaffold_27	985500	985696	+	17	0.571	18	7.3	1	7.3	8.32e-05	0.91
ENSGACG00000000474	scaffold_80-20	scaffold_80	344595	344791	+	33	0.554	35	14.2	3	4.72	3.4e-06	0.93
ENSGACG00000000477	scaffold_163-3	scaffold_163	121653	121849	+	129	0.679	129	55.8	3	18.61	7.23e-49	0.81
ENSGACG00000000477	scaffold_163-4	scaffold_163	119330	119526	+	81	0.662	83	35.2	3	11.74	2.63e-25	0.92
ENSGACG00000000477	scaffold_163-8	scaffold_163	120464	120660	+	50	0.711	51	21.5	6	3.58	1.46e-06	0.89
ENSGACG00000000480	scaffold_163-3	scaffold_163	121653	121849	+	129	0.679	129	55.8	3	18.61	7.23e-49	0.81
ENSGACG00000000480	scaffold_163-4	scaffold_163	119330	119526	+	81	0.662	83	35.2	3	11.74	2.63e-25	0.92
ENSGACG00000000480	scaffold_163-8	scaffold_163	120464	120660	+	50	0.711	51	21.5	6	3.58	1.46e-06	0.89
ENSGACG00000000480	scaffold_163-1	scaffold_163	136553	136749	+	217	0.833	203	93.2	6	15.53	5.34e-75	0.82
ENSGACG00000000480	scaffold_163-9	scaffold_163	122576	122772	+	29	0.409	29	12.5	3	4.15	7.14e-05	0.9
ENSGACG00000000480	scaffold_163-12	scaffold_163	124432	124628	+	16	0.581	19	6.9	0.5	13.74	1.32e-05	0.97
ENSGACG00000000481	scaffold_101-1	scaffold_101	133635	133831	+	165	0.771	163	70.9	6	11.81	6.68e-49	0.84
ENSGACG00000000482	scaffold_163-1	scaffold_163	136553	136749	+	217	0.833	203	93.2	6	15.53	5.34e-75	0.82
ENSGACG00000000483	scaffold_163-2	scaffold_163	157541	157737	+	183	0.877	169	78.6	5	15.72	2.1e-63	0.86
ENSGACG00000000484	scaffold_80-8	scaffold_80	382584	382780	+	54	0.682	55	23.6	4	5.91	5.97e-11	0.96
ENSGACG00000000484	scaffold_80-9	scaffold_80	374410	374606	+	48	0.658	51	20.6	1	20.62	1.59e-19	0.86
ENSGACG00000000486	scaffold_27-204	scaffold_27	988560	988756	+	42	0.618	45	18	4	4.51	2.48e-07	0.98
ENSGACG00000000486	scaffold_27-285	scaffold_27	988140	988336	+	33	0.617	34	14.2	3	4.72	3.4e-06	0.93
ENSGACG00000000486	scaffold_27-27	scaffold_27	1003829	1004025	+	101	0.688	102	43.4	1	43.38	6.23e-54	0.9
ENSGACG00000000487	scaffold_139-2	scaffold_139	118728	118924	+	73	0.688	74	31.4	6	5.23	4.91e-13	0.89
ENSGACG00000000487	scaffold_139-22	scaffold_139	120201	120397	+	24	0.771	26	10.3	2	5.15	4.65e-05	0.95
ENSGACG00000000487	scaffold_139-28	scaffold_139	118185	118381	+	19	0.741	21	8.2	0.5	16.32	5.88e-08	0.91
ENSGACG00000000490	scaffold_80-2	scaffold_80	410512	410708	+	143	0.668	143	61.4	4	15.35	2.05e-49	0.92
ENSGACG00000000491	scaffold_80-2	scaffold_80	410512	410708	+	143	0.668	143	61.4	4	15.35	2.05e-49	0.92
ENSGACG00000000491	scaffold_80-12	scaffold_80	414513	414709	+	46	0.733	48	19.8	5	3.95	1.4e-06	0.94
ENSGACG00000000492	scaffold_101-17	scaffold_101	179695	179891	+	44	0.662	46	18.9	3	6.3	3.57e-09	0.9
ENSGACG00000000492	scaffold_101-30	scaffold_101	180580	180776	+	19	0.905	20	8.2	0.5	16.32	5.88e-08	1.01
ENSGACG00000000493	scaffold_27-27	scaffold_27	1003829	1004025	+	101	0.688	102	43.4	1	43.38	6.23e-54	0.9
ENSGACG00000000493	scaffold_27-338	scaffold_27	1009853	1010049	+	27	0.587	29	11.6	0.5	23.19	7.42e-12	0.9
ENSGACG00000000494	scaffold_163-2	scaffold_163	157541	157737	+	183	0.877	169	78.6	5	15.72	2.1e-63	0.86
ENSGACG00000000495	scaffold_101-17	scaffold_101	179695	179891	+	44	0.662	46	18.9	3	6.3	3.57e-09	0.9
ENSGACG00000000495	scaffold_101-30	scaffold_101	180580	180776	+	19	0.905	20	8.2	0.5	16.32	5.88e-08	1.01
ENSGACG00000000495	scaffold_101-14	scaffold_101	192641	192837	+	46	0.81	49	20.2	2	10.09	6.44e-14	0.96
ENSGACG00000000496	scaffold_80-12	scaffold_80	414513	414709	+	46	0.733	48	19.8	5	3.95	1.4e-06	0.94
ENSGACG00000000497	scaffold_101-14	scaffold_101	192641	192837	+	46	0.81	49	20.2	2	10.09	6.44e-14	0.96
ENSGACG00000000498	scaffold_27-338	scaffold_27	1009853	1010049	+	27	0.587	29	11.6	0.5	23.19	7.42e-12	0.9
ENSGACG00000000498	scaffold_27-227	scaffold_27	1010362	1010558	+	41	0.649	41	17.6	3	5.87	2.16e-08	0.89
ENSGACG00000000499	scaffold_101-18	scaffold_101	205953	206149	+	44	0.603	45	18.9	2	9.45	6.19e-12	0.88
ENSGACG00000000500	scaffold_80-21	scaffold_80	462292	462488	+	33	0.771	34	14.2	3	4.72	3.4e-06	0.9
ENSGACG00000000501	scaffold_139-22	scaffold_139	120201	120397	+	24	0.771	26	10.3	2	5.15	4.65e-05	0.95
ENSGACG00000000501	scaffold_139-26	scaffold_139	129715	129911	+	23	0.613	24	9.9	0.5	19.76	3.26e-09	0.95
ENSGACG00000000502	scaffold_27-250	scaffold_27	1018354	1018550	+	37	0.787	38	15.9	3	5.3	6.7e-07	0.92
ENSGACG00000000503	scaffold_80-33	scaffold_80	511639	511835	+	18	0.633	20	7.7	1	7.73	8.32e-05	0.91
ENSGACG00000000505	scaffold_139-9	scaffold_139	138011	138207	+	51	0.658	54	21.9	3	7.3	1.18e-11	0.97
ENSGACG00000000506	scaffold_80-5	scaffold_80	575396	575592	+	74	0.638	76	31.8	1	31.78	4.62e-35	0.87
ENSGACG00000000506	scaffold_80-18	scaffold_80	555930	556126	+	36	0.723	36	15.5	3	5.15	6.7e-07	0.95
ENSGACG00000000507	scaffold_101-9	scaffold_101	285105	285301	+	66	0.722	65	28.3	5	5.67	9.93e-13	0.89
ENSGACG00000000508	scaffold_27-24	scaffold_27	1035761	1035957	+	102	0.718	103	43.8	11	3.98	2.22e-13	0.89
ENSGACG00000000510	scaffold_101-9	scaffold_101	285105	285301	+	66	0.722	65	28.3	5	5.67	9.93e-13	0.89
ENSGACG00000000510	scaffold_101-2	scaffold_101	288373	288569	+	148	0.645	146	63.6	8	7.95	1.52e-34	0.85
ENSGACG00000000510	scaffold_101-5	scaffold_101	288969	289165	+	77	0.609	84	33.9	5	6.79	1.06e-16	0.85
ENSGACG00000000510	scaffold_101-12	scaffold_101	300187	300383	+	55	0.671	59	23.6	4	5.91	5.97e-11	0.86
ENSGACG00000000510	scaffold_101-13	scaffold_101	300685	300881	+	52	0.659	54	22.8	2	11.38	5.53e-16	0.89
ENSGACG00000000510	scaffold_101-15	scaffold_101	294975	295171	+	46	0.697	48	19.8	1	19.76	3.18e-18	0.88
ENSGACG00000000510	scaffold_101-35	scaffold_101	327610	327806	+	18	0.615	18	7.7	0.5	15.46	9.4e-07	1.02
ENSGACG00000000511	scaffold_139-7	scaffold_139	160739	160935	+	56	0.688	56	24.1	2	12.03	3.98e-18	0.97
ENSGACG00000000511	scaffold_139-32	scaffold_139	158725	158921	+	17	0.655	19	7.3	1	7.3	8.32e-05	0.91
ENSGACG00000000512	scaffold_27-66	scaffold_27	1039931	1040127	+	73	0.694	75	31.4	1	31.35	4.62e-35	0.89
ENSGACG00000000513	scaffold_139-7	scaffold_139	160739	160935	+	56	0.688	56	24.1	2	12.03	3.98e-18	0.97
ENSGACG00000000513	scaffold_139-32	scaffold_139	158725	158921	+	17	0.655	19	7.3	1	7.3	8.32e-05	0.91
ENSGACG00000000513	scaffold_139-6	scaffold_139	173249	173445	+	58	0.688	57	24.9	2	12.46	3.98e-18	0.92
ENSGACG00000000514	scaffold_101-35	scaffold_101	327610	327806	+	18	0.615	18	7.7	0.5	15.46	9.4e-07	1.02
ENSGACG00000000514	scaffold_101-3	scaffold_101	334530	334726	+	94	0.688	93	40.4	5	8.07	8.55e-23	0.9
ENSGACG00000000514	scaffold_101-19	scaffold_101	335157	335353	+	41	0.824	43	18	3	6.01	3.57e-09	0.89
ENSGACG00000000514	scaffold_101-24	scaffold_101	336161	336357	+	29	0.829	29	12.5	0.5	24.91	3.09e-13	0.93
ENSGACG00000000515	scaffold_139-6	scaffold_139	173249	173445	+	58	0.688	57	24.9	2	12.46	3.98e-18	0.92
ENSGACG00000000515	scaffold_139-13	scaffold_139	190260	190456	+	42	0.773	42	18	3	6.01	3.57e-09	0.96
ENSGACG00000000516	scaffold_27-66	scaffold_27	1039931	1040127	+	73	0.694	75	31.4	1	31.35	4.62e-35	0.89
ENSGACG00000000516	scaffold_27-191	scaffold_27	1045998	1046194	+	43	0.727	46	18.5	3	6.16	3.57e-09	0.93
ENSGACG00000000518	scaffold_139-13	scaffold_139	190260	190456	+	42	0.773	42	18	3	6.01	3.57e-09	0.96
ENSGACG00000000518	scaffold_139-5	scaffold_139	207759	207955	+	58	0.64	58	24.9	3	8.3	2.57e-14	0.92
ENSGACG00000000521	scaffold_139-5	scaffold_139	207759	207955	+	58	0.64	58	24.9	3	8.3	2.57e-14	0.92
ENSGACG00000000521	scaffold_139-1	scaffold_139	217410	217606	+	80	0.736	81	34.4	2	17.18	8.35e-30	0.89
ENSGACG00000000521	scaffold_139-3	scaffold_139	208229	208425	+	62	0.679	62	26.6	4	6.66	2.4e-13	0.89
ENSGACG00000000522	scaffold_27-327	scaffold_27	1061073	1061269	+	29	0.756	30	12.5	1	12.46	8.32e-10	0.97
ENSGACG00000000524	scaffold_27-295	scaffold_27	1099922	1100118	+	31	0.58	32	13.3	2	6.66	2.07e-07	0.93
ENSGACG00000000524	scaffold_27-356	scaffold_27	1098528	1098724	+	28	0.641	28	12	2	6.01	1.36e-06	0.9
ENSGACG00000000526	scaffold_27-41	scaffold_27	1102757	1102953	+	90	0.748	90	38.7	0.5	77.31	4.22e-57	0.93
ENSGACG00000000527	scaffold_139-1	scaffold_139	217410	217606	+	80	0.736	81	34.4	2	17.18	8.35e-30	0.89
ENSGACG00000000529	scaffold_101-11	scaffold_101	342153	342349	+	59	0.678	60	25.3	6	4.22	5.89e-09	0.89
ENSGACG00000000532	scaffold_101-6	scaffold_101	351304	351500	+	81	0.719	81	34.8	8	4.35	7.45e-12	0.84
ENSGACG00000000532	scaffold_101-26	scaffold_101	356839	357035	+	23	0.767	25	10.3	1	10.31	1.11e-07	0.91
ENSGACG00000000536	scaffold_27-648	scaffold_27	1123570	1123766	+	17	0.567	18	7.3	1	7.3	8.32e-05	0.91
ENSGACG00000000538	scaffold_101-26	scaffold_101	356839	357035	+	23	0.767	25	10.3	1	10.31	1.11e-07	0.91
ENSGACG00000000538	scaffold_101-7	scaffold_101	357306	357502	+	72	0.607	73	30.9	8	3.87	2.1e-09	0.86
ENSGACG00000000538	scaffold_101-16	scaffold_101	376867	377063	+	48	0.603	48	20.6	2	10.31	6.44e-14	0.87
ENSGACG00000000538	scaffold_101-20	scaffold_101	376242	376438	+	40	0.851	40	17.2	3	5.73	2.16e-08	0.94
ENSGACG00000000539	scaffold_27-125	scaffold_27	1131170	1131366	+	58	0.795	58	24.9	2	12.46	3.98e-18	0.91
ENSGACG00000000539	scaffold_27-271	scaffold_27	1131666	1131862	+	35	0.667	35	15	3	5.01	6.7e-07	0.92
ENSGACG00000000541	scaffold_101-16	scaffold_101	376867	377063	+	48	0.603	48	20.6	2	10.31	6.44e-14	0.87
ENSGACG00000000541	scaffold_101-20	scaffold_101	376242	376438	+	40	0.851	40	17.2	3	5.73	2.16e-08	0.94
ENSGACG00000000544	scaffold_27-271	scaffold_27	1131666	1131862	+	35	0.667	35	15	3	5.01	6.7e-07	0.92
ENSGACG00000000554	scaffold_67-39	scaffold_67	123907	124103	+	17	0.704	17	7.3	1	7.3	8.32e-05	0.96
ENSGACG00000000557	scaffold_27-272	scaffold_27	1196388	1196584	+	34	0.787	35	14.6	2	7.3	2.93e-08	0.9
ENSGACG00000000570	scaffold_90-2	scaffold_90	31356	31552	+	125	0.718	124	53.7	4	13.42	3.75e-40	0.82
ENSGACG00000000570	scaffold_90-9	scaffold_90	29357	29553	+	83	0.755	84	35.6	3	11.88	2.63e-25	0.89
ENSGACG00000000570	scaffold_90-8	scaffold_90	30231	30427	+	82	0.745	85	35.6	3	11.88	2.63e-25	0.91
ENSGACG00000000570	scaffold_90-10	scaffold_90	27711	27907	+	78	0.674	80	33.5	2	16.75	1.42e-28	0.88
ENSGACG00000000570	scaffold_90-16	scaffold_90	28473	28669	+	65	0.575	65	27.9	3	9.31	3.9e-17	0.89
ENSGACG00000000570	scaffold_90-17	scaffold_90	35750	35946	+	64	0.786	65	27.5	6	4.58	2.96e-10	0.92
ENSGACG00000000570	scaffold_90-27	scaffold_90	34997	35193	+	38	0.667	40	16.3	4	4.08	4.89e-06	0.94
ENSGACG00000000570	scaffold_90-39	scaffold_90	21758	21954	+	25	0.735	25	10.7	1	10.74	1.11e-07	0.91
ENSGACG00000000572	scaffold_27-215	scaffold_27	1217905	1218101	+	42	0.705	43	18	2	9.02	6.19e-12	0.88
ENSGACG00000000573	scaffold_67-1	scaffold_67	250103	250299	+	314	0.721	294	134.9	9	14.98	4.9e-105	0.75
ENSGACG00000000573	scaffold_67-2	scaffold_67	253904	254100	+	140	0.734	141	60.1	2	30.07	1.94e-65	0.81
ENSGACG00000000578	scaffold_90-7	scaffold_90	49062	49258	+	85	0.65	88	36.5	5	7.3	3.05e-19	0.89
ENSGACG00000000578	scaffold_90-38	scaffold_90	45025	45221	+	26	0.679	26	11.2	0.5	22.33	7.42e-12	0.94
ENSGACG00000000578	scaffold_90-41	scaffold_90	45633	45829	+	21	0.543	23	9	1	9.02	1.13e-06	0.96
ENSGACG00000000581	scaffold_90-7	scaffold_90	49062	49258	+	85	0.65	88	36.5	5	7.3	3.05e-19	0.89
ENSGACG00000000581	scaffold_90-25	scaffold_90	55181	55377	+	45	0.6	47	19.3	5	3.87	1.4e-06	0.97
ENSGACG00000000581	scaffold_90-28	scaffold_90	54315	54511	+	39	0.808	39	16.8	3	5.58	1.24e-07	0.91
ENSGACG00000000582	scaffold_67-9	scaffold_67	418658	418854	+	36	0.846	38	15.5	2	7.73	3.87e-09	0.92
ENSGACG00000000582	scaffold_67-24	scaffold_67	360136	360332	+	22	0.676	22	9.4	1	9.45	1.13e-06	0.91
ENSGACG00000000585	scaffold_27-22	scaffold_27	1239005	1239201	+	110	0.74	107	47.2	7	6.75	2.16e-23	0.86
ENSGACG00000000585	scaffold_27-649	scaffold_27	1243462	1243658	+	17	0.792	18	7.3	0.5	14.6	9.4e-07	0.96
ENSGACG00000000586	scaffold_90-25	scaffold_90	55181	55377	+	45	0.6	47	19.3	5	3.87	1.4e-06	0.97
ENSGACG00000000586	scaffold_90-28	scaffold_90	54315	54511	+	39	0.808	39	16.8	3	5.58	1.24e-07	0.91
ENSGACG00000000588	scaffold_67-11	scaffold_67	520336	520532	+	32	0.5	34	13.7	3	4.58	1.61e-05	0.9
ENSGACG00000000588	scaffold_67-12	scaffold_67	521109	521305	+	28	0.581	30	12.5	3	4.15	7.14e-05	0.94
ENSGACG00000000588	scaffold_67-16	scaffold_67	504007	504203	+	26	0.75	28	11.2	2	5.58	8.31e-06	0.98
ENSGACG00000000589	scaffold_90-34	scaffold_90	70301	70497	+	30	0.743	30	12.9	0.5	25.77	3.09e-13	0.93
ENSGACG00000000590	scaffold_90-34	scaffold_90	70301	70497	+	30	0.743	30	12.9	0.5	25.77	3.09e-13	0.93
ENSGACG00000000590	scaffold_90-14	scaffold_90	71911	72107	+	70	0.822	73	30.1	0.5	60.13	2.13e-42	0.95
ENSGACG00000000590	scaffold_90-52	scaffold_90	75219	75415	+	19	0.621	20	8.2	1	8.16	1.02e-05	0.96
ENSGACG00000000592	scaffold_439-1	scaffold_439	733	929	+	42	0.658	43	18	5	3.61	5.42e-06	0.91
ENSGACG00000000592	scaffold_439-3	scaffold_439	3550	3746	+	33	0.732	32	14.2	1	14.17	4.52e-12	1.06
ENSGACG00000000594	scaffold_67-5	scaffold_67	630331	630527	+	45	0.588	45	19.3	5	3.87	1.4e-06	0.88
ENSGACG00000000594	scaffold_67-8	scaffold_67	629635	629831	+	38	0.667	39	16.3	4	4.08	4.89e-06	0.97
ENSGACG00000000594	scaffold_67-7	scaffold_67	631738	631934	+	38	0.78	40	16.3	5	3.26	6.9e-05	0.87
ENSGACG00000000594	scaffold_67-43	scaffold_67	628887	629083	+	17	0.773	17	7.3	1	7.3	8.32e-05	0.96
ENSGACG00000000594	scaffold_67-10	scaffold_67	660679	660875	+	33	0.567	36	14.2	4	3.54	7.63e-05	0.93
ENSGACG00000000594	scaffold_67-36	scaffold_67	637870	638066	+	17	0.76	18	7.3	1	7.3	8.32e-05	0.91
ENSGACG00000000595	scaffold_365-1	scaffold_365	669	865	+	53	0.817	55	22.8	5	4.55	1.82e-08	0.9
ENSGACG00000000596	scaffold_90-29	scaffold_90	104234	104430	+	37	0.714	37	15.9	4	3.97	1.99e-05	0.95
ENSGACG00000000597	scaffold_90-4	scaffold_90	121629	121825	+	111	0.706	109	47.7	4	11.92	1.53e-33	0.94
ENSGACG00000000598	scaffold_90-4	scaffold_90	121629	121825	+	111	0.706	109	47.7	4	11.92	1.53e-33	0.94
ENSGACG00000000598	scaffold_90-13	scaffold_90	128406	128602	+	74	0.743	74	31.8	4	7.95	1.17e-17	0.98
ENSGACG00000000599	scaffold_27-22	scaffold_27	1239005	1239201	+	110	0.74	107	47.2	7	6.75	2.16e-23	0.86
ENSGACG00000000599	scaffold_27-649	scaffold_27	1243462	1243658	+	17	0.792	18	7.3	0.5	14.6	9.4e-07	0.96
ENSGACG00000000600	scaffold_365-2	scaffold_365	14992	15188	+	43	0.732	46	18.5	3	6.16	3.57e-09	0.93
ENSGACG00000000600	scaffold_365-3	scaffold_365	15593	15789	+	41	0.952	41	17.6	3	5.87	2.16e-08	0.93
ENSGACG00000000601	scaffold_27-605	scaffold_27	1257739	1257935	+	17	0.64	19	7.3	1	7.3	8.32e-05	0.91
ENSGACG00000000602	scaffold_365-2	scaffold_365	14992	15188	+	43	0.732	46	18.5	3	6.16	3.57e-09	0.93
ENSGACG00000000602	scaffold_365-3	scaffold_365	15593	15789	+	41	0.952	41	17.6	3	5.87	2.16e-08	0.93
ENSGACG00000000605	scaffold_27-29	scaffold_27	1291761	1291957	+	102	0.592	101	43.8	4	10.95	2.58e-29	0.87
ENSGACG00000000607	scaffold_90-31	scaffold_90	144075	144271	+	34	0.655	36	14.6	0.5	29.21	4.25e-16	0.93
ENSGACG00000000608	scaffold_27-29	scaffold_27	1291761	1291957	+	102	0.592	101	43.8	4	10.95	2.58e-29	0.87
ENSGACG00000000608	scaffold_27-59	scaffold_27	1292331	1292527	+	76	0.574	78	32.6	5	6.53	7.02e-16	0.9
ENSGACG00000000611	scaffold_90-5	scaffold_90	162066	162262	+	102	0.656	100	43.8	1	43.81	6.23e-54	0.86
ENSGACG00000000613	scaffold_90-5	scaffold_90	162066	162262	+	102	0.656	100	43.8	1	43.81	6.23e-54	0.86
ENSGACG00000000613	scaffold_90-11	scaffold_90	163640	163836	+	72	0.629	76	30.9	5	6.18	2.82e-14	0.88
ENSGACG00000000614	scaffold_27-67	scaffold_27	1357973	1358169	+	75	0.753	75	32.2	7	4.6	4.85e-12	0.84
ENSGACG00000000614	scaffold_27-357	scaffold_27	1358841	1359037	+	27	0.8	28	12	2	6.01	1.36e-06	0.94
ENSGACG00000000614	scaffold_27-11	scaffold_27	1371078	1371274	+	135	0.564	135	58	2	28.99	4.98e-61	0.83
ENSGACG00000000614	scaffold_27-23	scaffold_27	1364011	1364207	+	103	0.621	105	45.5	2	22.76	4.16e-44	0.86
ENSGACG00000000614	scaffold_27-25	scaffold_27	1359357	1359553	+	102	0.705	103	44.2	8	5.53	8.35e-19	0.88
ENSGACG00000000614	scaffold_27-50	scaffold_27	1363335	1363531	+	83	0.669	85	35.6	4	8.91	2.35e-21	0.86
ENSGACG00000000614	scaffold_27-96	scaffold_27	1360590	1360786	+	67	0.648	64	28.8	9	3.2	3.05e-07	0.96
ENSGACG00000000614	scaffold_27-251	scaffold_27	1361178	1361374	+	37	0.548	38	16.3	5	3.26	6.9e-05	0.95
ENSGACG00000000615	scaffold_27-11	scaffold_27	1371078	1371274	+	135	0.564	135	58	2	28.99	4.98e-61	0.83
ENSGACG00000000616	scaffold_90-3	scaffold_90	167000	167196	+	119	0.826	115	51.1	3	17.04	7.34e-44	0.89
ENSGACG00000000616	scaffold_90-35	scaffold_90	180161	180357	+	27	0.639	28	11.6	1	11.6	1e-08	0.94
ENSGACG00000000617	scaffold_27-472	scaffold_27	1412111	1412307	+	21	0.583	23	9	1	9.02	1.13e-06	0.95
ENSGACG00000000618	scaffold_27-377	scaffold_27	1420470	1420666	+	25	0.735	27	11.2	2	5.58	8.31e-06	0.98
ENSGACG00000000618	scaffold_27-472	scaffold_27	1412111	1412307	+	21	0.583	23	9	1	9.02	1.13e-06	0.95
ENSGACG00000000618	scaffold_27-608	scaffold_27	1421702	1421898	+	19	0.714	19	8.2	1	8.16	1.02e-05	0.96
ENSGACG00000000618	scaffold_27-265	scaffold_27	1424850	1425046	+	33	0.723	36	14.2	3	4.72	3.4e-06	0.96
ENSGACG00000000618	scaffold_27-291	scaffold_27	1426421	1426617	+	32	0.63	33	13.7	0.5	27.49	1.19e-14	0.93
ENSGACG00000000619	scaffold_90-35	scaffold_90	180161	180357	+	27	0.639	28	11.6	1	11.6	1e-08	0.94
ENSGACG00000000623	scaffold_90-6	scaffold_90	223177	223373	+	87	0.757	89	37.4	6	6.23	1.32e-17	0.81
ENSGACG00000000623	scaffold_90-45	scaffold_90	209677	209873	+	21	0.515	22	9	0.5	18.04	3.26e-09	0.91
ENSGACG00000000625	scaffold_405-1	scaffold_405	19142	19338	+	26	0.738	29	11.2	2	5.58	8.31e-06	1.02
ENSGACG00000000628	scaffold_88-8	scaffold_88	198732	198928	+	45	0.6	47	19.3	2	9.66	6.48e-13	0.9
ENSGACG00000000632	scaffold_27-192	scaffold_27	1485567	1485763	+	45	0.815	46	19.3	4	4.83	5.16e-08	0.9
ENSGACG00000000632	scaffold_27-399	scaffold_27	1486912	1487108	+	24	0.634	26	10.3	2	5.15	4.65e-05	1.04
ENSGACG00000000633	scaffold_27-49	scaffold_27	1503833	1504029	+	84	0.607	86	36.1	7	5.15	8.01e-15	0.92
ENSGACG00000000633	scaffold_27-108	scaffold_27	1502375	1502571	+	58	0.667	61	24.9	3	8.3	2.57e-14	0.94
ENSGACG00000000634	scaffold_90-6	scaffold_90	223177	223373	+	87	0.757	89	37.4	6	6.23	1.32e-17	0.81
ENSGACG00000000635	scaffold_90-49	scaffold_90	233930	234126	+	20	0.667	21	8.6	0.5	17.18	5.88e-08	0.91
ENSGACG00000000637	scaffold_88-4	scaffold_88	439817	440013	+	52	0.61	52	22.3	3	7.44	1.6e-12	0.9
ENSGACG00000000638	scaffold_27-159	scaffold_27	1508099	1508295	+	46	0.833	50	19.8	2	9.88	6.48e-13	0.9
ENSGACG00000000639	scaffold_90-18	scaffold_90	245086	245282	+	63	0.738	64	27.1	3	9.02	3.9e-17	0.99
ENSGACG00000000639	scaffold_90-30	scaffold_90	246265	246461	+	37	0.762	37	15.9	1	15.89	3e-13	0.95
ENSGACG00000000640	scaffold_90-18	scaffold_90	245086	245282	+	63	0.738	64	27.1	3	9.02	3.9e-17	0.99
ENSGACG00000000640	scaffold_90-30	scaffold_90	246265	246461	+	37	0.762	37	15.9	1	15.89	3e-13	0.95
ENSGACG00000000641	scaffold_27-159	scaffold_27	1508099	1508295	+	46	0.833	50	19.8	2	9.88	6.48e-13	0.9
ENSGACG00000000643	scaffold_27-153	scaffold_27	1534949	1535145	+	50	0.556	51	21.5	3	7.16	1.18e-11	0.91
ENSGACG00000000644	scaffold_27-170	scaffold_27	1549868	1550064	+	48	0.731	49	20.6	6	3.44	5.18e-06	0.87
ENSGACG00000000645	scaffold_296-1	scaffold_296	44528	44724	+	79	0.688	80	34.4	7	4.91	2.09e-13	0.93
ENSGACG00000000645	scaffold_296-3	scaffold_296	39983	40179	+	37	0.647	40	15.9	2	7.95	3.87e-09	0.87
ENSGACG00000000648	scaffold_88-10	scaffold_88	446256	446452	+	38	0.603	39	16.3	3	5.44	1.24e-07	0.89
ENSGACG00000000650	scaffold_90-1	scaffold_90	310677	310873	+	221	0.871	207	94.9	4	23.73	6.9e-92	0.82
ENSGACG00000000650	scaffold_90-33	scaffold_90	294229	294425	+	31	0.46	31	13.3	1	13.31	6.36e-11	0.9
ENSGACG00000000651	scaffold_88-1	scaffold_88	456185	456381	+	168	0.813	155	72.2	3	24.05	1.91e-71	0.89
ENSGACG00000000653	scaffold_27-5	scaffold_27	1584523	1584719	+	172	0.555	168	73.9	4	18.47	3.86e-64	0.85
ENSGACG00000000653	scaffold_27-9	scaffold_27	1585574	1585770	+	145	0.64	145	62.3	4	15.57	1.32e-50	0.84
ENSGACG00000000653	scaffold_27-21	scaffold_27	1583427	1583623	+	107	0.678	108	46.4	4	11.6	1.8e-32	0.85
ENSGACG00000000653	scaffold_27-30	scaffold_27	1577626	1577822	+	99	0.742	99	42.5	2	21.26	4.44e-40	0.89
ENSGACG00000000653	scaffold_27-97	scaffold_27	1582170	1582366	+	64	0.663	64	27.5	3	9.16	3.9e-17	0.9
ENSGACG00000000653	scaffold_27-103	scaffold_27	1576846	1577042	+	61	0.683	62	26.2	2	13.1	2.43e-20	0.95
ENSGACG00000000653	scaffold_27-126	scaffold_27	1581549	1581745	+	57	0.509	58	24.5	5	4.9	8.07e-10	0.91
ENSGACG00000000653	scaffold_27-154	scaffold_27	1578259	1578455	+	51	0.82	51	21.9	2	10.95	6.11e-15	0.89
ENSGACG00000000653	scaffold_27-160	scaffold_27	1605618	1605814	+	50	0.608	50	21.5	5	4.3	8.11e-08	0.87
ENSGACG00000000653	scaffold_27-313	scaffold_27	1579322	1579518	+	31	0.56	31	13.3	2	6.66	2.07e-07	0.96
ENSGACG00000000653	scaffold_27-341	scaffold_27	1598003	1598199	+	29	0.634	29	12.5	2	6.23	1.36e-06	0.94
ENSGACG00000000653	scaffold_27-535	scaffold_27	1594224	1594420	+	19	0.69	21	8.2	0.5	16.32	5.88e-08	0.91
ENSGACG00000000653	scaffold_27-610	scaffold_27	1575026	1575222	+	18	0.571	19	8.2	1	8.16	1.02e-05	0.91
ENSGACG00000000656	scaffold_296-2	scaffold_296	45831	46027	+	40	0.759	41	17.2	2	8.59	5.61e-11	0.89
ENSGACG00000000658	scaffold_90-23	scaffold_90	343877	344073	+	50	0.831	53	21.5	2	10.74	6.11e-15	0.95
ENSGACG00000000659	scaffold_27-160	scaffold_27	1605618	1605814	+	50	0.608	50	21.5	5	4.3	8.11e-08	0.87
ENSGACG00000000659	scaffold_27-16	scaffold_27	1606503	1606699	+	117	0.644	117	50.3	2	25.13	5.21e-51	0.9
ENSGACG00000000659	scaffold_27-179	scaffold_27	1607266	1607462	+	46	0.704	48	19.8	5	3.95	1.4e-06	0.88
ENSGACG00000000661	scaffold_27-88	scaffold_27	1618696	1618892	+	66	0.724	68	28.3	5	5.67	9.93e-13	0.88
ENSGACG00000000661	scaffold_27-99	scaffold_27	1619304	1619500	+	63	0.657	63	27.1	0.5	54.12	4.15e-37	0.92
ENSGACG00000000661	scaffold_27-149	scaffold_27	1614476	1614672	+	51	0.722	52	22.3	3	7.44	1.6e-12	0.91
ENSGACG00000000661	scaffold_27-184	scaffold_27	1614927	1615123	+	44	0.595	47	18.9	2	9.45	6.19e-12	0.95
ENSGACG00000000661	scaffold_27-360	scaffold_27	1613287	1613483	+	26	0.694	28	11.2	1	11.17	1e-08	0.91
ENSGACG00000000662	scaffold_90-50	scaffold_90	369873	370069	+	21	0.846	21	9	1	9.02	1.13e-06	0.91
ENSGACG00000000663	scaffold_27-88	scaffold_27	1618696	1618892	+	66	0.724	68	28.3	5	5.67	9.93e-13	0.88
ENSGACG00000000663	scaffold_27-99	scaffold_27	1619304	1619500	+	63	0.657	63	27.1	0.5	54.12	4.15e-37	0.92
ENSGACG00000000663	scaffold_27-184	scaffold_27	1614927	1615123	+	44	0.595	47	18.9	2	9.45	6.19e-12	0.95
ENSGACG00000000664	scaffold_27-53	scaffold_27	1660974	1661170	+	82	0.723	82	35.2	2	17.61	4.76e-31	0.85
ENSGACG00000000664	scaffold_27-92	scaffold_27	1661436	1661632	+	65	0.685	65	28.3	4	7.09	5.02e-15	0.92
ENSGACG00000000664	scaffold_27-55	scaffold_27	1701935	1702131	+	78	0.605	80	33.5	2	16.75	1.42e-28	0.91
ENSGACG00000000664	scaffold_27-98	scaffold_27	1701512	1701708	+	64	0.659	64	27.9	4	6.98	3.53e-14	0.97
ENSGACG00000000664	scaffold_27-193	scaffold_27	1695017	1695213	+	45	0.614	46	19.3	4	4.83	5.16e-08	0.88
ENSGACG00000000664	scaffold_27-266	scaffold_27	1676596	1676792	+	35	0.829	36	15	4	3.76	1.99e-05	0.9
ENSGACG00000000664	scaffold_27-298	scaffold_27	1699927	1700123	+	29	0.705	32	12.5	1	12.46	8.32e-10	0.9
ENSGACG00000000664	scaffold_27-652	scaffold_27	1676068	1676264	+	18	0.533	18	7.7	0.5	15.46	9.4e-07	0.91
ENSGACG00000000665	scaffold_27-55	scaffold_27	1701935	1702131	+	78	0.605	80	33.5	2	16.75	1.42e-28	0.91
ENSGACG00000000665	scaffold_27-98	scaffold_27	1701512	1701708	+	64	0.659	64	27.9	4	6.98	3.53e-14	0.97
ENSGACG00000000665	scaffold_27-298	scaffold_27	1699927	1700123	+	29	0.705	32	12.5	1	12.46	8.32e-10	0.9
ENSGACG00000000665	scaffold_27-109	scaffold_27	1704337	1704533	+	60	0.706	61	25.8	7	3.68	1.07e-07	0.99
ENSGACG00000000667	scaffold_27-8	scaffold_27	1712439	1712635	+	150	0.76	148	64.4	2	32.21	2.03e-71	0.84
ENSGACG00000000668	scaffold_90-50	scaffold_90	369873	370069	+	21	0.846	21	9	1	9.02	1.13e-06	0.91
ENSGACG00000000671	scaffold_27-32	scaffold_27	1743284	1743480	+	93	0.608	96	40.4	8	5.05	6.78e-16	0.88
ENSGACG00000000671	scaffold_27-82	scaffold_27	1732373	1732569	+	67	0.615	69	28.8	1	28.78	1.25e-30	0.9
ENSGACG00000000671	scaffold_27-136	scaffold_27	1735343	1735539	+	55	0.49	55	23.6	4	5.91	5.97e-11	0.86
ENSGACG00000000671	scaffold_27-185	scaffold_27	1733277	1733473	+	48	0.672	47	20.6	3	6.87	8.31e-11	0.94
ENSGACG00000000671	scaffold_27-379	scaffold_27	1718539	1718735	+	27	0.622	27	11.6	0.5	23.19	7.42e-12	0.91
ENSGACG00000000671	scaffold_27-400	scaffold_27	1734387	1734583	+	26	0.512	26	11.2	0.5	22.33	7.42e-12	0.91
ENSGACG00000000671	scaffold_27-477	scaffold_27	1725271	1725467	+	22	0.818	23	9.4	1	9.45	1.13e-06	0.91
ENSGACG00000000675	scaffold_90-19	scaffold_90	397682	397878	+	60	0.847	61	25.8	4	6.44	1.57e-12	0.88
ENSGACG00000000679	scaffold_27-89	scaffold_27	1752373	1752569	+	64	0.653	68	27.5	4	6.87	3.53e-14	0.92
ENSGACG00000000680	scaffold_27-89	scaffold_27	1752373	1752569	+	64	0.653	68	27.5	4	6.87	3.53e-14	0.92
ENSGACG00000000680	scaffold_27-207	scaffold_27	1762147	1762343	+	44	0.541	44	18.9	4	4.72	2.48e-07	0.95
ENSGACG00000000680	scaffold_27-216	scaffold_27	1761603	1761799	+	40	0.662	43	18	6	3.01	5.69e-05	0.94
ENSGACG00000000681	scaffold_27-171	scaffold_27	1765888	1766084	+	48	0.79	49	20.6	2	10.31	6.44e-14	0.96
ENSGACG00000000683	scaffold_90-20	scaffold_90	400733	400929	+	61	0.782	61	26.2	2	13.1	2.43e-20	1.02
ENSGACG00000000684	scaffold_90-20	scaffold_90	400733	400929	+	61	0.782	61	26.2	2	13.1	2.43e-20	1.02
ENSGACG00000000684	scaffold_90-21	scaffold_90	401311	401507	+	58	0.711	57	24.9	1	24.91	6.18e-25	0.96
ENSGACG00000000686	scaffold_90-24	scaffold_90	404712	404908	+	50	0.739	50	21.5	6	3.58	1.46e-06	0.95
ENSGACG00000000688	scaffold_90-12	scaffold_90	405745	405941	+	74	0.777	75	32.2	0.5	64.43	5.37e-46	0.95
ENSGACG00000000689	scaffold_90-22	scaffold_90	416412	416608	+	55	0.707	54	23.6	5	4.72	3.91e-09	0.91
ENSGACG00000000696	scaffold_27-120	scaffold_27	1841222	1841418	+	58	0.613	59	24.9	8	3.11	3.73e-06	0.9
ENSGACG00000000697	scaffold_27-120	scaffold_27	1841222	1841418	+	58	0.613	59	24.9	8	3.11	3.73e-06	0.9
ENSGACG00000000697	scaffold_27-258	scaffold_27	1844551	1844747	+	37	0.783	37	15.9	3	5.3	6.7e-07	0.89
ENSGACG00000000698	scaffold_47-6	scaffold_47	5599	5795	+	109	0.636	110	46.8	3	15.61	8.57e-38	0.82
ENSGACG00000000698	scaffold_47-106	scaffold_47	6586	6782	+	19	0.643	19	8.2	0.5	16.32	5.88e-08	0.91
ENSGACG00000000702	scaffold_27-253	scaffold_27	1869796	1869992	+	38	0.755	38	16.3	3	5.44	1.24e-07	0.97
ENSGACG00000000703	scaffold_27-253	scaffold_27	1869796	1869992	+	38	0.755	38	16.3	3	5.44	1.24e-07	0.97
ENSGACG00000000703	scaffold_27-446	scaffold_27	1877272	1877468	+	24	0.463	24	10.3	2	5.15	4.65e-05	0.99
ENSGACG00000000703	scaffold_27-538	scaffold_27	1878417	1878613	+	20	0.559	21	9	0.5	18.04	3.26e-09	0.91
ENSGACG00000000704	scaffold_47-5	scaffold_47	86228	86424	+	119	0.919	121	51.5	3	17.18	7.34e-44	0.89
ENSGACG00000000704	scaffold_47-74	scaffold_47	85480	85676	+	30	0.935	30	12.9	1	12.89	8.32e-10	0.93
ENSGACG00000000707	scaffold_27-51	scaffold_27	1917209	1917405	+	86	0.752	85	36.9	5	7.39	3.05e-19	0.92
ENSGACG00000000709	scaffold_27-574	scaffold_27	1922818	1923014	+	20	0.655	20	8.6	1	8.59	1.02e-05	1.01
ENSGACG00000000710	scaffold_27-38	scaffold_27	1935338	1935534	+	92	0.667	92	39.5	4	9.88	3.01e-25	0.85
ENSGACG00000000711	scaffold_27-38	scaffold_27	1935338	1935534	+	92	0.667	92	39.5	4	9.88	3.01e-25	0.85
ENSGACG00000000711	scaffold_27-155	scaffold_27	1945050	1945246	+	50	0.729	51	21.5	3	7.16	1.18e-11	0.91
ENSGACG00000000712	scaffold_152-12	scaffold_152	195807	196003	+	23	0.958	23	9.9	1	9.88	1.13e-06	0.95
ENSGACG00000000713	scaffold_27-62	scaffold_27	1946277	1946473	+	75	0.626	77	32.2	6	5.37	9.15e-14	0.89
ENSGACG00000000715	scaffold_47-5	scaffold_47	86228	86424	+	119	0.919	121	51.5	3	17.18	7.34e-44	0.89
ENSGACG00000000715	scaffold_47-74	scaffold_47	85480	85676	+	30	0.935	30	12.9	1	12.89	8.32e-10	0.93
ENSGACG00000000717	scaffold_152-12	scaffold_152	195807	196003	+	23	0.958	23	9.9	1	9.88	1.13e-06	0.95
ENSGACG00000000717	scaffold_152-6	scaffold_152	197369	197565	+	49	0.769	51	21	7	3.01	1.45e-05	0.89
ENSGACG00000000721	scaffold_47-36	scaffold_47	122030	122226	+	55	0.81	55	23.6	1	23.62	1.48e-23	0.91
ENSGACG00000000721	scaffold_47-55	scaffold_47	114354	114550	+	36	0.818	36	15.5	2	7.73	3.87e-09	0.95
ENSGACG00000000721	scaffold_47-51	scaffold_47	122438	122634	+	36	0.875	37	15.5	3	5.15	6.7e-07	0.87
ENSGACG00000000721	scaffold_47-114	scaffold_47	113684	113880	+	18	0.696	18	7.7	1	7.73	8.32e-05	0.91
ENSGACG00000000725	scaffold_152-1	scaffold_152	220137	220333	+	71	0.837	72	30.9	4	7.73	9.13e-17	0.85
ENSGACG00000000726	scaffold_47-36	scaffold_47	122030	122226	+	55	0.81	55	23.6	1	23.62	1.48e-23	0.91
ENSGACG00000000726	scaffold_47-55	scaffold_47	114354	114550	+	36	0.818	36	15.5	2	7.73	3.87e-09	0.95
ENSGACG00000000726	scaffold_47-51	scaffold_47	122438	122634	+	36	0.875	37	15.5	3	5.15	6.7e-07	0.87
ENSGACG00000000726	scaffold_47-114	scaffold_47	113684	113880	+	18	0.696	18	7.7	1	7.73	8.32e-05	0.91
ENSGACG00000000726	scaffold_47-63	scaffold_47	123268	123464	+	30	0.66	33	12.9	2	6.44	1.36e-06	0.9
ENSGACG00000000727	scaffold_47-25	scaffold_47	138839	139035	+	65	0.789	68	27.9	3	9.31	3.9e-17	0.95
ENSGACG00000000727	scaffold_47-115	scaffold_47	138341	138537	+	18	0.7	18	7.7	1	7.73	8.32e-05	0.96
ENSGACG00000000728	scaffold_47-25	scaffold_47	138839	139035	+	65	0.789	68	27.9	3	9.31	3.9e-17	0.95
ENSGACG00000000728	scaffold_47-115	scaffold_47	138341	138537	+	18	0.7	18	7.7	1	7.73	8.32e-05	0.96
ENSGACG00000000729	scaffold_27-145	scaffold_27	2002645	2002841	+	53	0.578	53	22.8	6	3.79	3.91e-07	0.94
ENSGACG00000000730	scaffold_47-33	scaffold_47	204196	204392	+	55	0.733	57	23.6	6	3.94	1.01e-07	0.91
ENSGACG00000000730	scaffold_47-50	scaffold_47	205131	205327	+	39	0.756	39	16.8	1	16.75	1.87e-14	0.89
ENSGACG00000000730	scaffold_47-61	scaffold_47	202149	202345	+	34	0.551	35	14.6	3	4.87	3.4e-06	0.9
ENSGACG00000000730	scaffold_47-52	scaffold_47	201436	201632	+	33	0.786	37	14.2	1	14.17	4.52e-12	0.96
ENSGACG00000000731	scaffold_47-33	scaffold_47	204196	204392	+	55	0.733	57	23.6	6	3.94	1.01e-07	0.91
ENSGACG00000000731	scaffold_47-50	scaffold_47	205131	205327	+	39	0.756	39	16.8	1	16.75	1.87e-14	0.89
ENSGACG00000000731	scaffold_47-61	scaffold_47	202149	202345	+	34	0.551	35	14.6	3	4.87	3.4e-06	0.9
ENSGACG00000000731	scaffold_47-52	scaffold_47	201436	201632	+	33	0.786	37	14.2	1	14.17	4.52e-12	0.96
ENSGACG00000000731	scaffold_47-76	scaffold_47	205695	205891	+	28	0.565	30	12	1	12.03	8.32e-10	0.9
ENSGACG00000000731	scaffold_47-45	scaffold_47	214120	214316	+	38	0.707	42	16.3	2	8.16	4.8e-10	0.92
ENSGACG00000000732	scaffold_152-2	scaffold_152	222234	222430	+	57	0.626	58	24.5	3	8.16	2.57e-14	0.92
ENSGACG00000000734	scaffold_152-3	scaffold_152	240816	241012	+	57	0.614	58	24.5	4	6.12	9.88e-12	0.92
ENSGACG00000000734	scaffold_152-9	scaffold_152	236474	236670	+	29	0.75	29	12.5	0.5	24.91	3.09e-13	0.93
ENSGACG00000000737	scaffold_152-3	scaffold_152	240816	241012	+	57	0.614	58	24.5	4	6.12	9.88e-12	0.92
ENSGACG00000000737	scaffold_152-9	scaffold_152	236474	236670	+	29	0.75	29	12.5	0.5	24.91	3.09e-13	0.93
ENSGACG00000000738	scaffold_152-5	scaffold_152	261350	261546	+	51	0.635	53	21.9	3	7.3	1.18e-11	0.97
ENSGACG00000000739	scaffold_27-194	scaffold_27	2004958	2005154	+	45	0.712	46	19.3	5	3.87	1.4e-06	0.92
ENSGACG00000000741	scaffold_27-234	scaffold_27	2013144	2013340	+	38	0.617	40	16.3	3	5.44	1.24e-07	0.89
ENSGACG00000000743	scaffold_27-234	scaffold_27	2013144	2013340	+	38	0.617	40	16.3	3	5.44	1.24e-07	0.89
ENSGACG00000000744	scaffold_47-40	scaffold_47	243315	243511	+	48	0.742	50	20.6	4	5.15	1.02e-08	0.89
ENSGACG00000000745	scaffold_47-41	scaffold_47	256111	256307	+	49	0.554	49	21	3	7.02	1.18e-11	0.93
ENSGACG00000000746	scaffold_27-195	scaffold_27	2020454	2020650	+	43	0.759	46	18.5	5	3.69	5.42e-06	0.86
ENSGACG00000000747	scaffold_27-115	scaffold_27	2059557	2059753	+	59	0.682	60	25.3	4	6.34	1.57e-12	0.92
ENSGACG00000000747	scaffold_27-235	scaffold_27	2057421	2057617	+	40	0.732	40	17.2	3	5.73	2.16e-08	0.99
ENSGACG00000000747	scaffold_27-299	scaffold_27	2050577	2050773	+	31	0.729	32	13.7	2	6.87	2.07e-07	0.97
ENSGACG00000000750	scaffold_27-115	scaffold_27	2059557	2059753	+	59	0.682	60	25.3	4	6.34	1.57e-12	0.92
ENSGACG00000000750	scaffold_27-235	scaffold_27	2057421	2057617	+	40	0.732	40	17.2	3	5.73	2.16e-08	0.99
ENSGACG00000000750	scaffold_27-299	scaffold_27	2050577	2050773	+	31	0.729	32	13.7	2	6.87	2.07e-07	0.97
ENSGACG00000000751	scaffold_47-34	scaffold_47	283370	283566	+	56	0.654	56	24.5	2	12.24	3.98e-18	0.99
ENSGACG00000000751	scaffold_47-53	scaffold_47	279330	279526	+	37	0.704	37	16.3	3	5.44	1.24e-07	0.92
ENSGACG00000000751	scaffold_47-121	scaffold_47	276710	276906	+	17	0.6	17	7.3	1	7.3	8.32e-05	0.96
ENSGACG00000000753	scaffold_47-34	scaffold_47	283370	283566	+	56	0.654	56	24.5	2	12.24	3.98e-18	0.99
ENSGACG00000000753	scaffold_47-9	scaffold_47	306879	307075	+	100	0.603	102	43	5	8.59	1.23e-24	0.93
ENSGACG00000000753	scaffold_47-20	scaffold_47	302154	302350	+	82	0.838	82	35.2	2	17.61	4.76e-31	0.88
ENSGACG00000000753	scaffold_47-66	scaffold_47	306251	306447	+	29	0.775	32	12.5	0.5	24.91	3.09e-13	1.05
ENSGACG00000000755	scaffold_27-129	scaffold_27	2071828	2072024	+	56	0.615	57	24.1	4	6.01	9.88e-12	0.86
ENSGACG00000000758	scaffold_47-67	scaffold_47	344398	344594	+	31	0.8	32	13.3	1	13.31	6.36e-11	0.93
ENSGACG00000000759	scaffold_47-67	scaffold_47	344398	344594	+	31	0.8	32	13.3	1	13.31	6.36e-11	0.93
ENSGACG00000000764	scaffold_27-300	scaffold_27	2085275	2085471	+	30	0.729	32	12.9	3	4.3	7.14e-05	1
ENSGACG00000000770	scaffold_47-14	scaffold_47	398677	398873	+	93	0.765	92	39.9	6	6.66	3.18e-19	0.88
ENSGACG00000000771	scaffold_27-539	scaffold_27	2134955	2135151	+	19	0.645	21	8.2	1	8.16	1.02e-05	0.91
ENSGACG00000000775	scaffold_47-56	scaffold_47	421601	421797	+	36	0.692	36	15.5	4	3.87	1.99e-05	0.95
ENSGACG00000000777	scaffold_47-26	scaffold_47	544949	545145	+	68	0.761	68	29.6	7	4.23	4.32e-10	0.92
ENSGACG00000000782	scaffold_47-26	scaffold_47	544949	545145	+	68	0.761	68	29.6	7	4.23	4.32e-10	0.92
ENSGACG00000000782	scaffold_47-15	scaffold_47	549389	549585	+	91	0.636	91	39.1	4	9.77	3.01e-25	0.89
ENSGACG00000000782	scaffold_47-22	scaffold_47	549982	550178	+	78	0.661	78	33.5	7	4.79	1.02e-12	0.81
ENSGACG00000000782	scaffold_47-71	scaffold_47	555965	556161	+	29	0.644	31	12.9	2	6.44	1.36e-06	0.93
ENSGACG00000000782	scaffold_47-83	scaffold_47	554484	554680	+	24	0.719	26	10.3	1	10.31	1.11e-07	0.91
ENSGACG00000000786	scaffold_27-539	scaffold_27	2134955	2135151	+	19	0.645	21	8.2	1	8.16	1.02e-05	0.91
ENSGACG00000000787	scaffold_27-242	scaffold_27	2145019	2145215	+	37	0.725	39	15.9	3	5.3	6.7e-07	0.92
ENSGACG00000000787	scaffold_27-292	scaffold_27	2144642	2144838	+	30	0.554	33	12.9	3	4.3	7.14e-05	0.93
ENSGACG00000000789	scaffold_47-16	scaffold_47	577121	577317	+	90	0.669	91	38.7	3	12.89	1.39e-28	0.87
ENSGACG00000000793	scaffold_27-242	scaffold_27	2145019	2145215	+	37	0.725	39	15.9	3	5.3	6.7e-07	0.92
ENSGACG00000000793	scaffold_27-342	scaffold_27	2168362	2168558	+	28	0.73	29	12	3	4.01	7.14e-05	0.97
ENSGACG00000000793	scaffold_27-361	scaffold_27	2150362	2150558	+	26	0.7	28	11.2	0.5	22.33	7.42e-12	0.91
ENSGACG00000000793	scaffold_27-575	scaffold_27	2149406	2149602	+	19	0.516	20	8.2	1	8.16	1.02e-05	0.91
ENSGACG00000000794	scaffold_141-2	scaffold_141	4618	4814	+	85	0.765	84	36.5	4	9.13	2.61e-22	0.9
ENSGACG00000000795	scaffold_141-1	scaffold_141	33907	34103	+	100	0.711	101	43	2	21.48	4.44e-40	0.87
ENSGACG00000000798	scaffold_141-1	scaffold_141	33907	34103	+	100	0.711	101	43	2	21.48	4.44e-40	0.87
ENSGACG00000000798	scaffold_141-3	scaffold_141	59309	59505	+	81	0.658	82	34.8	3	11.6	3.08e-24	0.92
ENSGACG00000000799	scaffold_47-47	scaffold_47	656760	656956	+	39	0.726	40	17.2	3	5.73	2.16e-08	0.91
ENSGACG00000000799	scaffold_47-88	scaffold_47	660567	660763	+	24	0.703	25	10.3	0.5	20.62	1.63e-10	0.91
ENSGACG00000000800	scaffold_141-3	scaffold_141	59309	59505	+	81	0.658	82	34.8	3	11.6	3.08e-24	0.92
ENSGACG00000000803	scaffold_47-47	scaffold_47	656760	656956	+	39	0.726	40	17.2	3	5.73	2.16e-08	0.91
ENSGACG00000000803	scaffold_47-88	scaffold_47	660567	660763	+	24	0.703	25	10.3	0.5	20.62	1.63e-10	0.91
ENSGACG00000000803	scaffold_47-27	scaffold_47	674320	674516	+	63	0.636	63	27.1	8	3.38	1.04e-07	0.91
ENSGACG00000000803	scaffold_47-29	scaffold_47	685773	685969	+	59	0.558	60	26.2	2	13.1	2.43e-20	0.89
ENSGACG00000000803	scaffold_47-30	scaffold_47	686293	686489	+	58	0.759	60	24.9	4	6.23	9.88e-12	0.84
ENSGACG00000000803	scaffold_47-62	scaffold_47	685058	685254	+	34	0.589	34	14.6	3	4.87	3.4e-06	0.87
ENSGACG00000000803	scaffold_47-57	scaffold_47	678643	678839	+	33	0.617	36	14.2	3	4.72	3.4e-06	0.93
ENSGACG00000000803	scaffold_47-72	scaffold_47	673627	673823	+	28	0.789	31	12.5	1	12.46	8.32e-10	0.94
ENSGACG00000000803	scaffold_47-102	scaffold_47	682401	682597	+	20	0.581	20	8.6	1	8.59	1.02e-05	1.07
ENSGACG00000000804	scaffold_47-29	scaffold_47	685773	685969	+	59	0.558	60	26.2	2	13.1	2.43e-20	0.89
ENSGACG00000000804	scaffold_47-30	scaffold_47	686293	686489	+	58	0.759	60	24.9	4	6.23	9.88e-12	0.84
ENSGACG00000000804	scaffold_47-62	scaffold_47	685058	685254	+	34	0.589	34	14.6	3	4.87	3.4e-06	0.87
ENSGACG00000000804	scaffold_47-102	scaffold_47	682401	682597	+	20	0.581	20	8.6	1	8.59	1.02e-05	1.07
ENSGACG00000000805	scaffold_141-4	scaffold_141	117522	117718	+	79	0.69	77	33.9	10	3.39	7.37e-09	0.96
ENSGACG00000000807	scaffold_27-83	scaffold_27	2223378	2223574	+	68	0.676	69	29.2	3	9.74	4.29e-19	0.89
ENSGACG00000000807	scaffold_27-150	scaffold_27	2234341	2234537	+	51	0.633	52	21.9	3	7.3	1.18e-11	0.89
ENSGACG00000000809	scaffold_47-42	scaffold_47	733976	734172	+	45	0.75	49	19.3	1	19.33	3.18e-18	1.02
ENSGACG00000000810	scaffold_141-6	scaffold_141	147017	147213	+	45	0.682	46	19.3	3	6.44	5.59e-10	0.88
ENSGACG00000000810	scaffold_141-13	scaffold_141	147520	147716	+	19	0.95	19	8.2	1	8.16	1.02e-05	0.96
ENSGACG00000000811	scaffold_47-10	scaffold_47	758290	758486	+	98	0.579	98	42.1	3	14.03	4.17e-33	0.91
ENSGACG00000000811	scaffold_47-38	scaffold_47	760382	760578	+	53	0.696	53	22.8	7	3.25	4.53e-06	0.88
ENSGACG00000000811	scaffold_47-77	scaffold_47	754435	754631	+	28	0.674	30	12	2	6.01	1.36e-06	0.9
ENSGACG00000000811	scaffold_47-98	scaffold_47	753562	753758	+	20	0.567	21	8.6	1	8.59	1.02e-05	0.96
ENSGACG00000000812	scaffold_47-10	scaffold_47	758290	758486	+	98	0.579	98	42.1	3	14.03	4.17e-33	0.91
ENSGACG00000000812	scaffold_47-38	scaffold_47	760382	760578	+	53	0.696	53	22.8	7	3.25	4.53e-06	0.88
ENSGACG00000000812	scaffold_47-77	scaffold_47	754435	754631	+	28	0.674	30	12	2	6.01	1.36e-06	0.9
ENSGACG00000000812	scaffold_47-1	scaffold_47	794029	794225	+	151	0.631	149	64.9	2	32.43	2.03e-71	0.84
ENSGACG00000000812	scaffold_47-13	scaffold_47	793376	793572	+	93	0.591	93	39.9	4	9.99	3.01e-25	0.92
ENSGACG00000000812	scaffold_47-48	scaffold_47	777531	777727	+	39	0.593	40	17.2	3	5.73	2.16e-08	0.89
ENSGACG00000000814	scaffold_141-13	scaffold_141	147520	147716	+	19	0.95	19	8.2	1	8.16	1.02e-05	0.96
ENSGACG00000000814	scaffold_141-5	scaffold_141	152155	152351	+	47	0.796	47	20.6	2	10.31	6.44e-14	0.98
ENSGACG00000000814	scaffold_141-11	scaffold_141	151497	151693	+	25	0.706	26	10.7	1	10.74	1.11e-07	0.91
ENSGACG00000000815	scaffold_27-90	scaffold_27	2249488	2249684	+	64	0.619	67	27.9	6	4.65	2.96e-10	0.86
ENSGACG00000000815	scaffold_27-104	scaffold_27	2247901	2248097	+	61	0.722	62	26.2	4	6.55	2.4e-13	0.9
ENSGACG00000000815	scaffold_27-314	scaffold_27	2244871	2245067	+	29	0.622	31	12.9	3	4.3	7.14e-05	0.9
ENSGACG00000000816	scaffold_141-5	scaffold_141	152155	152351	+	47	0.796	47	20.6	2	10.31	6.44e-14	0.98
ENSGACG00000000816	scaffold_141-11	scaffold_141	151497	151693	+	25	0.706	26	10.7	1	10.74	1.11e-07	0.91
ENSGACG00000000816	scaffold_141-7	scaffold_141	172155	172351	+	42	0.755	42	18	6	3.01	5.69e-05	0.93
ENSGACG00000000817	scaffold_47-1	scaffold_47	794029	794225	+	151	0.631	149	64.9	2	32.43	2.03e-71	0.84
ENSGACG00000000818	scaffold_141-7	scaffold_141	172155	172351	+	42	0.755	42	18	6	3.01	5.69e-05	0.93
ENSGACG00000000820	scaffold_202-3	scaffold_202	67329	67525	+	69	0.729	71	29.6	1	29.64	4.3e-32	0.97
ENSGACG00000000820	scaffold_202-4	scaffold_202	66103	66299	+	45	0.672	46	19.3	4	4.83	5.16e-08	0.9
ENSGACG00000000821	scaffold_47-21	scaffold_47	827571	827767	+	76	0.637	79	32.6	1	32.64	1.44e-36	0.94
ENSGACG00000000822	scaffold_47-17	scaffold_47	837923	838119	+	85	0.702	86	36.5	4	9.13	2.61e-22	0.96
ENSGACG00000000822	scaffold_47-24	scaffold_47	833186	833382	+	66	0.582	69	28.3	1	28.35	1.25e-30	0.87
ENSGACG00000000823	scaffold_27-329	scaffold_27	2258994	2259190	+	29	0.674	30	12.5	3	4.15	7.14e-05	0.97
ENSGACG00000000825	scaffold_202-3	scaffold_202	67329	67525	+	69	0.729	71	29.6	1	29.64	4.3e-32	0.97
ENSGACG00000000825	scaffold_202-4	scaffold_202	66103	66299	+	45	0.672	46	19.3	4	4.83	5.16e-08	0.9
ENSGACG00000000825	scaffold_202-1	scaffold_202	80228	80424	+	83	0.689	85	35.6	6	5.94	4.94e-16	0.87
ENSGACG00000000826	scaffold_47-17	scaffold_47	837923	838119	+	85	0.702	86	36.5	4	9.13	2.61e-22	0.96
ENSGACG00000000826	scaffold_47-11	scaffold_47	850343	850539	+	94	0.672	98	40.8	7	5.83	8.57e-18	0.85
ENSGACG00000000826	scaffold_47-54	scaffold_47	849645	849841	+	36	0.6	37	15.5	0.5	30.92	1.42e-17	0.95
ENSGACG00000000826	scaffold_47-73	scaffold_47	848996	849192	+	29	0.732	31	12.5	2	6.23	1.36e-06	0.9
ENSGACG00000000827	scaffold_47-11	scaffold_47	850343	850539	+	94	0.672	98	40.8	7	5.83	8.57e-18	0.85
ENSGACG00000000827	scaffold_47-54	scaffold_47	849645	849841	+	36	0.6	37	15.5	0.5	30.92	1.42e-17	0.95
ENSGACG00000000827	scaffold_47-73	scaffold_47	848996	849192	+	29	0.732	31	12.5	2	6.23	1.36e-06	0.9
ENSGACG00000000827	scaffold_47-18	scaffold_47	850922	851118	+	85	0.779	86	36.5	2	18.25	2.64e-32	0.85
ENSGACG00000000828	scaffold_202-1	scaffold_202	80228	80424	+	83	0.689	85	35.6	6	5.94	4.94e-16	0.87
ENSGACG00000000828	scaffold_202-2	scaffold_202	81315	81511	+	76	0.726	76	33.1	9	3.67	5.95e-10	0.89
ENSGACG00000000828	scaffold_202-6	scaffold_202	104971	105167	+	18	0.538	18	7.7	0.5	15.46	9.4e-07	0.91
ENSGACG00000000829	scaffold_27-329	scaffold_27	2258994	2259190	+	29	0.674	30	12.5	3	4.15	7.14e-05	0.97
ENSGACG00000000829	scaffold_27-15	scaffold_27	2270774	2270970	+	121	0.753	120	52	2	25.99	2.04e-52	0.91
ENSGACG00000000830	scaffold_27-140	scaffold_27	2277672	2277868	+	53	0.778	54	22.8	0.5	45.53	1.29e-28	0.88
ENSGACG00000000830	scaffold_27-222	scaffold_27	2277197	2277393	+	41	0.667	42	17.6	5	3.52	1.99e-05	0.96
ENSGACG00000000830	scaffold_27-540	scaffold_27	2279968	2280164	+	21	0.576	21	9	1	9.02	1.13e-06	0.95
ENSGACG00000000831	scaffold_27-140	scaffold_27	2277672	2277868	+	53	0.778	54	22.8	0.5	45.53	1.29e-28	0.88
ENSGACG00000000831	scaffold_27-540	scaffold_27	2279968	2280164	+	21	0.576	21	9	1	9.02	1.13e-06	0.95
ENSGACG00000000831	scaffold_27-1	scaffold_27	2290664	2290860	+	197	0.688	191	85	4	21.26	1.02e-79	0.82
ENSGACG00000000831	scaffold_27-12	scaffold_27	2291089	2291285	+	133	0.771	133	57.1	2	28.56	4.98e-61	0.86
ENSGACG00000000831	scaffold_27-40	scaffold_27	2301340	2301536	+	90	0.685	91	38.7	3	12.89	1.39e-28	0.92
ENSGACG00000000831	scaffold_27-343	scaffold_27	2294443	2294639	+	27	0.75	29	11.6	2	5.8	8.31e-06	0.94
ENSGACG00000000831	scaffold_27-420	scaffold_27	2289647	2289843	+	25	0.605	25	10.7	2	5.37	4.65e-05	0.91
ENSGACG00000000832	scaffold_27-10	scaffold_27	2311379	2311575	+	145	0.725	140	62.3	4	15.57	1.32e-50	0.97
ENSGACG00000000832	scaffold_27-40	scaffold_27	2301340	2301536	+	90	0.685	91	38.7	3	12.89	1.39e-28	0.92
ENSGACG00000000832	scaffold_27-172	scaffold_27	2310848	2311044	+	48	0.672	49	20.6	1	20.62	1.59e-19	0.89
ENSGACG00000000832	scaffold_27-42	scaffold_27	2327509	2327705	+	89	0.611	90	38.7	1	38.66	7.22e-46	0.86
ENSGACG00000000832	scaffold_27-141	scaffold_27	2328682	2328878	+	53	0.649	54	22.8	4	5.69	3.46e-10	0.9
ENSGACG00000000832	scaffold_27-173	scaffold_27	2337126	2337322	+	48	0.6	49	21	0.5	42.09	5.66e-27	0.93
ENSGACG00000000833	scaffold_27-42	scaffold_27	2327509	2327705	+	89	0.611	90	38.7	1	38.66	7.22e-46	0.86
ENSGACG00000000833	scaffold_27-141	scaffold_27	2328682	2328878	+	53	0.649	54	22.8	4	5.69	3.46e-10	0.9
ENSGACG00000000833	scaffold_27-173	scaffold_27	2337126	2337322	+	48	0.6	49	21	0.5	42.09	5.66e-27	0.93
ENSGACG00000000833	scaffold_27-161	scaffold_27	2363862	2364058	+	48	0.729	50	21	4	5.26	1.92e-09	0.87
ENSGACG00000000839	scaffold_27-162	scaffold_27	2446102	2446298	+	45	0.603	50	19.3	3	6.44	5.59e-10	0.94
ENSGACG00000000839	scaffold_27-196	scaffold_27	2470507	2470703	+	45	0.541	46	19.3	4	4.83	5.16e-08	0.88
ENSGACG00000000839	scaffold_27-223	scaffold_27	2445531	2445727	+	41	0.759	42	17.6	0.5	35.22	1.3e-20	0.89
ENSGACG00000000839	scaffold_27-301	scaffold_27	2441018	2441214	+	31	0.694	32	13.3	2	6.66	2.07e-07	0.93
ENSGACG00000000839	scaffold_27-330	scaffold_27	2452373	2452569	+	30	0.538	30	12.9	2	6.44	1.36e-06	0.9
ENSGACG00000000839	scaffold_27-362	scaffold_27	2446710	2446906	+	28	0.49	28	12	0.5	24.05	3.09e-13	1.05
ENSGACG00000000839	scaffold_27-479	scaffold_27	2437937	2438133	+	22	0.619	23	9.4	0.5	18.9	3.26e-09	0.91
ENSGACG00000000839	scaffold_27-617	scaffold_27	2466757	2466953	+	19	0.654	19	8.2	0.5	16.32	5.88e-08	0.91
ENSGACG00000000839	scaffold_27-579	scaffold_27	2443777	2443973	+	18	0.545	20	7.7	1	7.73	8.32e-05	0.91
ENSGACG00000000839	scaffold_27-705	scaffold_27	2437104	2437300	+	17	0.467	17	7.3	0.5	14.6	9.4e-07	0.91
ENSGACG00000000843	scaffold_47-4	scaffold_47	884177	884373	+	129	0.834	126	55.4	3	18.47	7.23e-49	0.87
ENSGACG00000000843	scaffold_47-37	scaffold_47	883734	883930	+	54	0.775	55	23.2	3	7.73	2.07e-13	0.92
ENSGACG00000000844	scaffold_197-2	scaffold_197	37250	37446	+	101	0.689	102	43.4	7	6.2	3.92e-20	0.85
ENSGACG00000000845	scaffold_27-110	scaffold_27	2501883	2502079	+	58	0.792	61	25.3	5	5.07	1.6e-10	0.96
ENSGACG00000000845	scaffold_27-224	scaffold_27	2491643	2491839	+	42	0.655	42	18	6	3.01	5.69e-05	0.88
ENSGACG00000000845	scaffold_27-363	scaffold_27	2492913	2493109	+	27	0.583	28	11.6	0.5	23.19	7.42e-12	0.9
ENSGACG00000000845	scaffold_27-710	scaffold_27	2495895	2496091	+	16	0.56	17	7.3	1	7.3	8.32e-05	0.9
ENSGACG00000000846	scaffold_47-4	scaffold_47	884177	884373	+	129	0.834	126	55.4	3	18.47	7.23e-49	0.87
ENSGACG00000000846	scaffold_47-37	scaffold_47	883734	883930	+	54	0.775	55	23.2	3	7.73	2.07e-13	0.92
ENSGACG00000000847	scaffold_197-2	scaffold_197	37250	37446	+	101	0.689	102	43.4	7	6.2	3.92e-20	0.85
ENSGACG00000000850	scaffold_47-43	scaffold_47	901097	901293	+	43	0.734	44	18.5	4	4.62	2.48e-07	0.9
ENSGACG00000000852	scaffold_47-43	scaffold_47	901097	901293	+	43	0.734	44	18.5	4	4.62	2.48e-07	0.9
ENSGACG00000000852	scaffold_47-19	scaffold_47	904391	904587	+	83	0.702	86	35.6	3	11.88	2.63e-25	0.91
ENSGACG00000000853	scaffold_47-68	scaffold_47	912806	913002	+	31	0.714	32	13.3	3	4.44	1.61e-05	0.96
ENSGACG00000000858	scaffold_27-110	scaffold_27	2501883	2502079	+	58	0.792	61	25.3	5	5.07	1.6e-10	0.96
ENSGACG00000000858	scaffold_27-43	scaffold_27	2515679	2515875	+	90	0.788	90	38.7	2	19.33	7.5e-35	0.85
ENSGACG00000000858	scaffold_27-259	scaffold_27	2515100	2515296	+	37	0.576	37	15.9	4	3.97	1.99e-05	0.97
ENSGACG00000000858	scaffold_27-163	scaffold_27	2516954	2517150	+	45	0.694	50	19.3	4	4.83	5.16e-08	0.9
ENSGACG00000000860	scaffold_197-1	scaffold_197	81219	81415	+	191	0.821	187	82	5	16.41	3.12e-68	0.81
ENSGACG00000000861	scaffold_37-4	scaffold_37	305382	305578	+	69	0.692	72	29.6	2	14.82	8.8e-24	0.88
ENSGACG00000000861	scaffold_37-20	scaffold_37	304539	304735	+	44	0.621	44	18.9	3	6.3	3.57e-09	0.95
ENSGACG00000000861	scaffold_37-44	scaffold_37	265260	265456	+	24	0.611	26	10.3	1	10.31	1.11e-07	0.99
ENSGACG00000000867	scaffold_47-35	scaffold_47	1125576	1125772	+	56	0.671	56	24.1	6	4.01	2.48e-08	0.89
ENSGACG00000000867	scaffold_47-60	scaffold_47	1117451	1117647	+	34	0.554	36	14.6	4	3.65	7.63e-05	0.99
ENSGACG00000000867	scaffold_47-97	scaffold_47	1097668	1097864	+	20	0.595	22	8.6	1	8.59	1.02e-05	0.91
ENSGACG00000000868	scaffold_27-43	scaffold_27	2515679	2515875	+	90	0.788	90	38.7	2	19.33	7.5e-35	0.85
ENSGACG00000000868	scaffold_27-259	scaffold_27	2515100	2515296	+	37	0.576	37	15.9	4	3.97	1.99e-05	0.97
ENSGACG00000000868	scaffold_27-163	scaffold_27	2516954	2517150	+	45	0.694	50	19.3	4	4.83	5.16e-08	0.9
ENSGACG00000000870	scaffold_47-39	scaffold_47	1131847	1132043	+	50	0.551	52	21.5	0.5	42.95	5.66e-27	0.89
ENSGACG00000000880	scaffold_550-1	scaffold_550	9963	10159	+	35	0.667	37	15	2	7.52	3.87e-09	0.87
ENSGACG00000000882	scaffold_27-174	scaffold_27	2535352	2535548	+	50	0.81	49	21.5	3	7.16	1.18e-11	0.93
ENSGACG00000000882	scaffold_27-480	scaffold_27	2534892	2535088	+	22	0.781	23	9.4	1	9.45	1.13e-06	0.91
ENSGACG00000000884	scaffold_27-174	scaffold_27	2535352	2535548	+	50	0.81	49	21.5	3	7.16	1.18e-11	0.93
ENSGACG00000000884	scaffold_27-480	scaffold_27	2534892	2535088	+	22	0.781	23	9.4	1	9.45	1.13e-06	0.91
ENSGACG00000000885	scaffold_157-3	scaffold_157	23458	23654	+	52	0.82	53	22.3	3	7.44	1.6e-12	0.89
ENSGACG00000000888	scaffold_157-3	scaffold_157	23458	23654	+	52	0.82	53	22.3	3	7.44	1.6e-12	0.89
ENSGACG00000000890	scaffold_47-31	scaffold_47	1218648	1218844	+	59	0.783	60	25.3	5	5.07	1.6e-10	0.86
ENSGACG00000000892	scaffold_47-31	scaffold_47	1218648	1218844	+	59	0.783	60	25.3	5	5.07	1.6e-10	0.86
ENSGACG00000000892	scaffold_47-64	scaffold_47	1236057	1236253	+	31	0.706	33	13.3	2	6.66	2.07e-07	0.93
ENSGACG00000000897	scaffold_27-84	scaffold_27	2548795	2548991	+	69	0.609	69	29.6	7	4.23	4.32e-10	0.89
ENSGACG00000000897	scaffold_27-581	scaffold_27	2604743	2604939	+	20	0.769	20	8.6	1	8.59	1.02e-05	1.01
ENSGACG00000000897	scaffold_27-620	scaffold_27	2603162	2603358	+	19	0.64	19	8.2	1	8.16	1.02e-05	0.91
ENSGACG00000000898	scaffold_27-581	scaffold_27	2604743	2604939	+	20	0.769	20	8.6	1	8.59	1.02e-05	1.01
ENSGACG00000000898	scaffold_27-620	scaffold_27	2603162	2603358	+	19	0.64	19	8.2	1	8.16	1.02e-05	0.91
ENSGACG00000000898	scaffold_27-228	scaffold_27	2624366	2624562	+	39	0.725	41	16.8	5	3.35	6.9e-05	1.02
ENSGACG00000000898	scaffold_27-621	scaffold_27	2611615	2611811	+	18	0.704	19	7.7	0.5	15.46	9.4e-07	1.02
ENSGACG00000000901	scaffold_47-12	scaffold_47	1288511	1288707	+	94	0.595	96	40.4	3	13.46	8e-31	0.84
ENSGACG00000000903	scaffold_37-22	scaffold_37	811180	811376	+	40	0.641	43	17.2	1	17.18	1.09e-15	0.94
ENSGACG00000000905	scaffold_157-8	scaffold_157	62190	62386	+	25	0.781	26	10.7	1	10.74	1.11e-07	0.91
ENSGACG00000000906	scaffold_27-228	scaffold_27	2624366	2624562	+	39	0.725	41	16.8	5	3.35	6.9e-05	1.02
ENSGACG00000000906	scaffold_27-384	scaffold_27	2635883	2636079	+	27	0.658	27	11.6	1	11.6	1e-08	0.94
ENSGACG00000000909	scaffold_157-8	scaffold_157	62190	62386	+	25	0.781	26	10.7	1	10.74	1.11e-07	0.91
ENSGACG00000000909	scaffold_157-2	scaffold_157	95691	95887	+	62	0.807	62	26.6	7	3.8	2.85e-08	0.86
ENSGACG00000000909	scaffold_157-7	scaffold_157	63921	64117	+	27	0.714	28	11.6	0.5	23.19	7.42e-12	0.98
ENSGACG00000000909	scaffold_157-11	scaffold_157	76537	76733	+	23	0.8	24	9.9	1	9.88	1.13e-06	0.91
ENSGACG00000000911	scaffold_27-384	scaffold_27	2635883	2636079	+	27	0.658	27	11.6	1	11.6	1e-08	0.94
ENSGACG00000000917	scaffold_47-12	scaffold_47	1288511	1288707	+	94	0.595	96	40.4	3	13.46	8e-31	0.84
ENSGACG00000000917	scaffold_47-7	scaffold_47	1294499	1294695	+	106	0.652	108	46	4	11.49	2.08e-31	0.88
ENSGACG00000000917	scaffold_47-28	scaffold_47	1293954	1294150	+	60	0.72	63	25.8	3	8.59	3.07e-15	0.88
ENSGACG00000000917	scaffold_47-129	scaffold_47	1309858	1310054	+	16	0.652	17	6.9	0.5	13.74	1.32e-05	0.9
ENSGACG00000000919	scaffold_157-2	scaffold_157	95691	95887	+	62	0.807	62	26.6	7	3.8	2.85e-08	0.86
ENSGACG00000000920	scaffold_27-254	scaffold_27	2691265	2691461	+	36	0.694	38	15.5	2	7.73	3.87e-09	0.89
ENSGACG00000000924	scaffold_27-34	scaffold_27	2749806	2750002	+	94	0.651	95	40.4	6	6.73	4.75e-20	0.86
ENSGACG00000000924	scaffold_27-385	scaffold_27	2735261	2735457	+	26	0.833	27	11.2	2	5.58	8.31e-06	0.94
ENSGACG00000000924	scaffold_27-546	scaffold_27	2767317	2767513	+	21	0.481	21	9	1	9.02	1.13e-06	0.91
ENSGACG00000000926	scaffold_37-24	scaffold_37	916012	916208	+	39	0.783	39	16.8	3	5.58	1.24e-07	0.94
ENSGACG00000000926	scaffold_37-28	scaffold_37	915421	915617	+	34	0.612	34	14.6	1	14.6	4.52e-12	0.9
ENSGACG00000000929	scaffold_47-2	scaffold_47	1325293	1325489	+	146	0.651	146	63.1	7	9.02	9e-38	0.78
ENSGACG00000000930	scaffold_27-546	scaffold_27	2767317	2767513	+	21	0.481	21	9	1	9.02	1.13e-06	0.91
ENSGACG00000000932	scaffold_47-2	scaffold_47	1325293	1325489	+	146	0.651	146	63.1	7	9.02	9e-38	0.78
ENSGACG00000000933	scaffold_37-21	scaffold_37	975702	975898	+	42	0.678	44	18	6	3.01	5.69e-05	0.95
ENSGACG00000000933	scaffold_37-27	scaffold_37	969305	969501	+	35	0.661	38	15	0.5	30.07	1.42e-17	0.9
ENSGACG00000000933	scaffold_37-16	scaffold_37	976381	976577	+	50	0.62	51	21.5	2	10.74	6.11e-15	0.89
ENSGACG00000000933	scaffold_37-50	scaffold_37	1007501	1007697	+	25	0.667	25	10.7	1	10.74	1.11e-07	0.91
ENSGACG00000000934	scaffold_37-18	scaffold_37	1037226	1037422	+	44	0.586	48	18.9	5	3.78	5.42e-06	0.92
ENSGACG00000000939	scaffold_157-5	scaffold_157	142085	142281	+	38	0.717	39	16.3	3	5.44	1.24e-07	0.92
ENSGACG00000000940	scaffold_37-12	scaffold_37	1430957	1431153	+	58	0.763	60	24.9	2	12.46	3.98e-18	0.9
ENSGACG00000000945	scaffold_27-277	scaffold_27	2826439	2826635	+	33	0.642	35	14.2	3	4.72	3.4e-06	0.99
ENSGACG00000000945	scaffold_27-405	scaffold_27	2837691	2837887	+	25	0.591	26	10.7	1	10.74	1.11e-07	0.94
ENSGACG00000000948	scaffold_323-1	scaffold_323	9789	9985	+	212	0.812	204	91.1	4	22.76	8.68e-88	0.81
ENSGACG00000000951	scaffold_37-8	scaffold_37	1616529	1616725	+	62	0.638	62	26.6	2	13.31	2.43e-20	0.88
ENSGACG00000000954	scaffold_323-1	scaffold_323	9789	9985	+	212	0.812	204	91.1	4	22.76	8.68e-88	0.81
ENSGACG00000000957	scaffold_323-2	scaffold_323	36050	36246	+	70	0.789	74	30.5	5	6.1	2.82e-14	0.86
ENSGACG00000000958	scaffold_47-32	scaffold_47	1531406	1531602	+	58	0.877	59	24.9	5	4.98	8.07e-10	0.92
ENSGACG00000000959	scaffold_157-1	scaffold_157	154198	154394	+	172	0.682	166	73.9	4	18.47	3.86e-64	0.87
ENSGACG00000000959	scaffold_157-10	scaffold_157	152877	153073	+	25	0.667	25	10.7	0.5	21.48	1.63e-10	0.98
ENSGACG00000000959	scaffold_157-9	scaffold_157	152015	152211	+	24	0.706	26	10.3	1	10.31	1.11e-07	0.95
ENSGACG00000000960	scaffold_47-3	scaffold_47	1541868	1542064	+	136	0.892	138	59.3	2	29.64	5.82e-64	0.86
ENSGACG00000000961	scaffold_47-49	scaffold_47	1590277	1590473	+	39	0.548	40	16.8	1	16.75	1.87e-14	0.97
ENSGACG00000000963	scaffold_27-277	scaffold_27	2826439	2826635	+	33	0.642	35	14.2	3	4.72	3.4e-06	0.99
ENSGACG00000000963	scaffold_27-405	scaffold_27	2837691	2837887	+	25	0.591	26	10.7	1	10.74	1.11e-07	0.94
ENSGACG00000000965	scaffold_37-5	scaffold_37	1701188	1701384	+	63	0.793	69	27.5	5	5.5	5.6e-12	0.94
ENSGACG00000000965	scaffold_37-25	scaffold_37	1702160	1702356	+	37	0.686	39	15.9	2	7.95	3.87e-09	0.89
ENSGACG00000000966	scaffold_47-46	scaffold_47	1610899	1611095	+	42	0.778	42	18	4	4.51	2.48e-07	0.86
ENSGACG00000000966	scaffold_47-8	scaffold_47	1673146	1673342	+	101	0.72	104	43.8	2	21.9	2.06e-41	0.87
ENSGACG00000000969	scaffold_47-8	scaffold_47	1673146	1673342	+	101	0.72	104	43.8	2	21.9	2.06e-41	0.87
ENSGACG00000000970	scaffold_37-5	scaffold_37	1701188	1701384	+	63	0.793	69	27.5	5	5.5	5.6e-12	0.94
ENSGACG00000000970	scaffold_37-25	scaffold_37	1702160	1702356	+	37	0.686	39	15.9	2	7.95	3.87e-09	0.89
ENSGACG00000000972	scaffold_37-2	scaffold_37	1753158	1753354	+	95	0.647	96	40.8	2	20.4	1.92e-37	0.88
ENSGACG00000000972	scaffold_37-26	scaffold_37	1743236	1743432	+	37	0.522	39	15.9	1	15.89	3e-13	0.92
ENSGACG00000000972	scaffold_37-31	scaffold_37	1743809	1744005	+	30	0.684	31	12.9	2	6.44	1.36e-06	0.9
ENSGACG00000000972	scaffold_37-105	scaffold_37	1744462	1744658	+	17	0.485	19	7.3	0.5	14.6	9.4e-07	0.91
ENSGACG00000000975	scaffold_37-2	scaffold_37	1753158	1753354	+	95	0.647	96	40.8	2	20.4	1.92e-37	0.88
ENSGACG00000000975	scaffold_37-26	scaffold_37	1743236	1743432	+	37	0.522	39	15.9	1	15.89	3e-13	0.92
ENSGACG00000000975	scaffold_37-31	scaffold_37	1743809	1744005	+	30	0.684	31	12.9	2	6.44	1.36e-06	0.9
ENSGACG00000000975	scaffold_37-105	scaffold_37	1744462	1744658	+	17	0.485	19	7.3	0.5	14.6	9.4e-07	0.91
ENSGACG00000000980	scaffold_27-405	scaffold_27	2837691	2837887	+	25	0.591	26	10.7	1	10.74	1.11e-07	0.94
ENSGACG00000000981	scaffold_37-7	scaffold_37	1804121	1804317	+	62	0.693	63	26.6	4	6.66	2.4e-13	0.98
ENSGACG00000000981	scaffold_37-17	scaffold_37	1805756	1805952	+	47	0.533	50	20.6	1	20.62	1.59e-19	0.88
ENSGACG00000000981	scaffold_37-107	scaffold_37	1804672	1804868	+	19	0.857	19	8.2	0.5	16.32	5.88e-08	0.96
ENSGACG00000000987	scaffold_37-46	scaffold_37	2027245	2027441	+	25	0.657	26	10.7	1	10.74	1.11e-07	0.91
ENSGACG00000000987	scaffold_37-52	scaffold_37	1981776	1981972	+	24	0.643	25	10.3	2	5.15	4.65e-05	0.91
ENSGACG00000000991	scaffold_277-1	scaffold_277	14997	15193	+	123	0.587	123	53.3	8	6.66	6.73e-26	0.82
ENSGACG00000000999	scaffold_37-109	scaffold_37	2086948	2087144	+	18	0.586	19	7.7	1	7.73	8.32e-05	0.96
ENSGACG00000001000	scaffold_108-1	scaffold_108	254182	254378	+	64	0.606	64	27.5	1	27.49	3.5e-29	0.97
ENSGACG00000001000	scaffold_108-2	scaffold_108	244136	244332	+	34	0.829	34	14.6	0.5	29.21	4.25e-16	0.96
ENSGACG00000001000	scaffold_108-3	scaffold_108	241100	241296	+	28	0.639	31	12	1	12.03	8.32e-10	0.97
ENSGACG00000001002	scaffold_37-120	scaffold_37	2129103	2129299	+	18	0.625	18	7.7	1	7.73	8.32e-05	0.96
ENSGACG00000001005	scaffold_108-1	scaffold_108	254182	254378	+	64	0.606	64	27.5	1	27.49	3.5e-29	0.97
ENSGACG00000001005	scaffold_108-2	scaffold_108	244136	244332	+	34	0.829	34	14.6	0.5	29.21	4.25e-16	0.96
ENSGACG00000001005	scaffold_108-3	scaffold_108	241100	241296	+	28	0.639	31	12	1	12.03	8.32e-10	0.97
ENSGACG00000001006	scaffold_37-11	scaffold_37	2220047	2220243	+	61	0.685	61	26.2	2	13.1	2.43e-20	0.92
ENSGACG00000001006	scaffold_37-14	scaffold_37	2218463	2218659	+	50	0.534	52	21.9	5	4.38	8.11e-08	0.91
ENSGACG00000001006	scaffold_37-32	scaffold_37	2190973	2191169	+	29	0.558	30	12.5	2	6.23	1.36e-06	0.93
ENSGACG00000001006	scaffold_37-36	scaffold_37	2220512	2220708	+	28	0.735	29	12	2	6.01	1.36e-06	0.97
ENSGACG00000001006	scaffold_37-48	scaffold_37	2198886	2199082	+	25	0.743	26	11.2	2	5.58	8.31e-06	0.91
ENSGACG00000001006	scaffold_37-72	scaffold_37	2208630	2208826	+	24	0.583	23	10.3	2	5.15	4.65e-05	1.04
ENSGACG00000001006	scaffold_37-71	scaffold_37	2190149	2190345	+	22	0.561	23	9.4	1	9.45	1.13e-06	0.95
ENSGACG00000001006	scaffold_37-135	scaffold_37	2203683	2203879	+	15	0.63	17	6.4	0.5	12.89	1.32e-05	0.9
ENSGACG00000001007	scaffold_277-2	scaffold_277	29073	29269	+	80	0.661	81	34.8	0.5	69.58	1.2e-49	0.94
ENSGACG00000001008	scaffold_27-134	scaffold_27	2899278	2899474	+	53	0.7	56	22.8	4	5.69	3.46e-10	0.87
ENSGACG00000001008	scaffold_27-197	scaffold_27	2911238	2911434	+	44	0.629	46	18.9	5	3.78	5.42e-06	0.9
ENSGACG00000001011	scaffold_27-134	scaffold_27	2899278	2899474	+	53	0.7	56	22.8	4	5.69	3.46e-10	0.87
ENSGACG00000001011	scaffold_27-164	scaffold_27	2913977	2914173	+	50	0.576	50	21.5	7	3.07	1.45e-05	0.87
ENSGACG00000001011	scaffold_27-197	scaffold_27	2911238	2911434	+	44	0.629	46	18.9	5	3.78	5.42e-06	0.9
ENSGACG00000001011	scaffold_27-73	scaffold_27	2920496	2920692	+	72	0.593	71	30.9	3	10.31	4.28e-20	0.87
ENSGACG00000001011	scaffold_27-165	scaffold_27	2928622	2928818	+	49	0.683	50	21	1	21.05	7.54e-21	0.97
ENSGACG00000001011	scaffold_27-293	scaffold_27	2923591	2923787	+	31	0.611	33	13.3	3	4.44	1.61e-05	0.9
ENSGACG00000001011	scaffold_27-548	scaffold_27	2922813	2923009	+	20	0.576	21	8.6	1	8.59	1.02e-05	0.91
ENSGACG00000001013	scaffold_27-165	scaffold_27	2928622	2928818	+	49	0.683	50	21	1	21.05	7.54e-21	0.97
ENSGACG00000001013	scaffold_27-293	scaffold_27	2923591	2923787	+	31	0.611	33	13.3	3	4.44	1.61e-05	0.9
ENSGACG00000001013	scaffold_27-548	scaffold_27	2922813	2923009	+	20	0.576	21	8.6	1	8.59	1.02e-05	0.91
ENSGACG00000001013	scaffold_27-100	scaffold_27	2934435	2934631	+	60	0.67	63	25.8	2	12.89	3.17e-19	0.87
ENSGACG00000001018	scaffold_37-11	scaffold_37	2220047	2220243	+	61	0.685	61	26.2	2	13.1	2.43e-20	0.92
ENSGACG00000001018	scaffold_37-14	scaffold_37	2218463	2218659	+	50	0.534	52	21.9	5	4.38	8.11e-08	0.91
ENSGACG00000001018	scaffold_37-36	scaffold_37	2220512	2220708	+	28	0.735	29	12	2	6.01	1.36e-06	0.97
ENSGACG00000001021	scaffold_37-6	scaffold_37	2268738	2268934	+	62	0.586	65	26.6	6	4.44	1.34e-09	0.89
ENSGACG00000001021	scaffold_37-19	scaffold_37	2271250	2271446	+	43	0.597	45	18.5	3	6.16	3.57e-09	0.93
ENSGACG00000001022	scaffold_27-100	scaffold_27	2934435	2934631	+	60	0.67	63	25.8	2	12.89	3.17e-19	0.87
ENSGACG00000001022	scaffold_27-93	scaffold_27	2946285	2946481	+	63	0.839	65	27.1	3	9.02	3.9e-17	0.92
ENSGACG00000001022	scaffold_27-198	scaffold_27	2948852	2949048	+	45	0.613	46	19.3	2	9.66	6.48e-13	0.92
ENSGACG00000001022	scaffold_27-267	scaffold_27	2952276	2952472	+	36	0.9	36	15.5	0.5	30.92	1.42e-17	0.92
ENSGACG00000001022	scaffold_27-260	scaffold_27	2949451	2949647	+	35	0.554	37	15	1	15.03	3e-13	0.92
ENSGACG00000001022	scaffold_27-505	scaffold_27	2947432	2947628	+	21	0.639	22	9	0.5	18.04	3.26e-09	0.91
ENSGACG00000001023	scaffold_306-1	scaffold_306	46675	46871	+	45	0.679	46	19.3	1	19.33	3.18e-18	0.9
ENSGACG00000001024	scaffold_37-6	scaffold_37	2268738	2268934	+	62	0.586	65	26.6	6	4.44	1.34e-09	0.89
ENSGACG00000001024	scaffold_37-19	scaffold_37	2271250	2271446	+	43	0.597	45	18.5	3	6.16	3.57e-09	0.93
ENSGACG00000001025	scaffold_27-93	scaffold_27	2946285	2946481	+	63	0.839	65	27.1	3	9.02	3.9e-17	0.92
ENSGACG00000001025	scaffold_27-198	scaffold_27	2948852	2949048	+	45	0.613	46	19.3	2	9.66	6.48e-13	0.92
ENSGACG00000001025	scaffold_27-267	scaffold_27	2952276	2952472	+	36	0.9	36	15.5	0.5	30.92	1.42e-17	0.92
ENSGACG00000001025	scaffold_27-260	scaffold_27	2949451	2949647	+	35	0.554	37	15	1	15.03	3e-13	0.92
ENSGACG00000001025	scaffold_27-505	scaffold_27	2947432	2947628	+	21	0.639	22	9	0.5	18.04	3.26e-09	0.91
ENSGACG00000001029	scaffold_27-317	scaffold_27	2978133	2978329	+	30	0.744	31	12.9	1	12.89	8.32e-10	0.93
ENSGACG00000001035	scaffold_27-17	scaffold_27	2989412	2989608	+	114	0.631	117	49	5	9.79	2.15e-30	0.89
ENSGACG00000001041	scaffold_221-2	scaffold_221	22122	22318	+	67	0.741	68	28.8	3	9.59	4.16e-18	0.88
ENSGACG00000001041	scaffold_221-6	scaffold_221	22603	22799	+	33	0.971	33	14.2	0.5	28.35	4.25e-16	1.02
ENSGACG00000001042	scaffold_27-17	scaffold_27	2989412	2989608	+	114	0.631	117	49	5	9.79	2.15e-30	0.89
ENSGACG00000001042	scaffold_27-13	scaffold_27	3008587	3008783	+	126	0.622	125	54.1	2	27.06	1.1e-56	0.93
ENSGACG00000001049	scaffold_27-54	scaffold_27	3019370	3019566	+	81	0.856	81	34.8	1	34.79	1.28e-39	0.98
ENSGACG00000001049	scaffold_27-91	scaffold_27	3018612	3018808	+	65	0.647	66	27.9	4	6.98	3.53e-14	0.93
ENSGACG00000001049	scaffold_27-116	scaffold_27	3014433	3014629	+	60	0.695	60	25.8	3	8.59	3.07e-15	0.87
ENSGACG00000001049	scaffold_27-225	scaffold_27	3014776	3014972	+	40	0.638	42	17.2	3	5.73	2.16e-08	0.94
ENSGACG00000001051	scaffold_171-1	scaffold_171	176969	177165	+	23	0.958	23	9.9	0.5	19.76	3.26e-09	1.04
ENSGACG00000001052	scaffold_27-54	scaffold_27	3019370	3019566	+	81	0.856	81	34.8	1	34.79	1.28e-39	0.98
ENSGACG00000001052	scaffold_27-91	scaffold_27	3018612	3018808	+	65	0.647	66	27.9	4	6.98	3.53e-14	0.93
ENSGACG00000001052	scaffold_27-209	scaffold_27	3019884	3020080	+	44	0.625	44	18.9	5	3.78	5.42e-06	0.95
ENSGACG00000001055	scaffold_37-34	scaffold_37	2412287	2412483	+	30	0.714	30	12.9	1	12.89	8.32e-10	0.93
ENSGACG00000001055	scaffold_37-41	scaffold_37	2411574	2411770	+	26	0.524	27	11.2	2	5.58	8.31e-06	0.98
ENSGACG00000001055	scaffold_37-42	scaffold_37	2426177	2426373	+	25	0.595	27	10.7	1	10.74	1.11e-07	0.98
ENSGACG00000001056	scaffold_27-147	scaffold_27	3031093	3031289	+	51	0.645	53	22.3	4	5.58	3.46e-10	0.99
ENSGACG00000001056	scaffold_27-386	scaffold_27	3031568	3031764	+	25	0.75	27	10.7	1	10.74	1.11e-07	0.94
ENSGACG00000001058	scaffold_27-147	scaffold_27	3031093	3031289	+	51	0.645	53	22.3	4	5.58	3.46e-10	0.99
ENSGACG00000001058	scaffold_27-386	scaffold_27	3031568	3031764	+	25	0.75	27	10.7	1	10.74	1.11e-07	0.94
ENSGACG00000001059	scaffold_27-68	scaffold_27	3034134	3034330	+	69	0.689	73	30.1	5	6.01	2.82e-14	0.88
ENSGACG00000001061	scaffold_27-180	scaffold_27	3053185	3053381	+	47	0.656	48	20.6	5	4.12	3.45e-07	0.98
ENSGACG00000001061	scaffold_27-243	scaffold_27	3050199	3050395	+	36	0.729	39	15.5	2	7.73	3.87e-09	0.89
ENSGACG00000001061	scaffold_27-406	scaffold_27	3052640	3052836	+	25	0.714	26	11.2	2	5.58	8.31e-06	0.91
ENSGACG00000001062	scaffold_150-6	scaffold_150	15516	15712	+	75	0.752	77	32.2	6	5.37	9.15e-14	0.89
ENSGACG00000001063	scaffold_27-180	scaffold_27	3053185	3053381	+	47	0.656	48	20.6	5	4.12	3.45e-07	0.98
ENSGACG00000001063	scaffold_27-243	scaffold_27	3050199	3050395	+	36	0.729	39	15.5	2	7.73	3.87e-09	0.89
ENSGACG00000001063	scaffold_27-406	scaffold_27	3052640	3052836	+	25	0.714	26	11.2	2	5.58	8.31e-06	0.91
ENSGACG00000001064	scaffold_150-6	scaffold_150	15516	15712	+	75	0.752	77	32.2	6	5.37	9.15e-14	0.89
ENSGACG00000001064	scaffold_150-14	scaffold_150	19316	19512	+	59	0.711	60	25.3	2	12.67	3.17e-19	0.89
ENSGACG00000001065	scaffold_27-60	scaffold_27	3079591	3079787	+	77	0.696	78	33.1	2	16.54	1.42e-28	0.94
ENSGACG00000001066	scaffold_150-14	scaffold_150	19316	19512	+	59	0.711	60	25.3	2	12.67	3.17e-19	0.89
ENSGACG00000001066	scaffold_150-1	scaffold_150	24224	24420	+	122	0.571	123	52.8	3	17.61	4.23e-45	0.85
ENSGACG00000001067	scaffold_121-19	scaffold_121	12615	12811	+	19	0.708	21	8.2	1	8.16	1.02e-05	0.91
ENSGACG00000001068	scaffold_121-21	scaffold_121	104120	104316	+	18	0.7	19	7.7	1	7.73	8.32e-05	0.91
ENSGACG00000001070	scaffold_27-85	scaffold_27	3131001	3131197	+	69	0.722	69	29.6	3	9.88	4.29e-19	0.89
ENSGACG00000001072	scaffold_150-5	scaffold_150	27877	28073	+	80	0.842	80	34.4	2	17.18	8.35e-30	0.9
ENSGACG00000001072	scaffold_150-17	scaffold_150	29751	29947	+	50	0.662	51	21.5	1	21.48	7.54e-21	0.91
ENSGACG00000001072	scaffold_150-23	scaffold_150	30383	30579	+	29	0.705	31	12.5	1	12.46	8.32e-10	0.93
ENSGACG00000001076	scaffold_150-5	scaffold_150	27877	28073	+	80	0.842	80	34.4	2	17.18	8.35e-30	0.9
ENSGACG00000001076	scaffold_150-17	scaffold_150	29751	29947	+	50	0.662	51	21.5	1	21.48	7.54e-21	0.91
ENSGACG00000001076	scaffold_150-23	scaffold_150	30383	30579	+	29	0.705	31	12.5	1	12.46	8.32e-10	0.93
ENSGACG00000001078	scaffold_150-4	scaffold_150	59520	59716	+	84	0.842	82	36.1	5	7.22	3.05e-19	0.92
ENSGACG00000001078	scaffold_150-11	scaffold_150	67340	67536	+	62	0.724	64	26.6	2	13.31	2.43e-20	0.98
ENSGACG00000001078	scaffold_150-20	scaffold_150	56650	56846	+	35	0.712	38	15.5	1	15.46	3e-13	0.92
ENSGACG00000001082	scaffold_27-86	scaffold_27	3132303	3132499	+	69	0.789	69	29.6	4	7.41	6.88e-16	0.9
ENSGACG00000001087	scaffold_150-18	scaffold_150	80651	80847	+	48	0.73	50	20.6	4	5.15	1.02e-08	0.91
ENSGACG00000001088	scaffold_121-2	scaffold_121	167131	167327	+	67	0.638	73	28.8	2	14.39	1.28e-22	0.84
ENSGACG00000001088	scaffold_121-14	scaffold_121	159083	159279	+	26	0.7	28	11.2	2	5.58	8.31e-06	0.94
ENSGACG00000001089	scaffold_27-19	scaffold_27	3179135	3179331	+	107	0.635	110	46.4	5	9.28	1.95e-28	0.86
ENSGACG00000001090	scaffold_27-2	scaffold_27	3182020	3182216	+	194	0.625	186	84.6	8	10.58	8.09e-55	0.84
ENSGACG00000001091	scaffold_150-13	scaffold_150	109242	109438	+	61	0.679	62	26.2	4	6.55	2.4e-13	0.88
ENSGACG00000001091	scaffold_150-25	scaffold_150	110890	111086	+	25	0.579	26	10.7	2	5.37	4.65e-05	0.98
ENSGACG00000001092	scaffold_150-13	scaffold_150	109242	109438	+	61	0.679	62	26.2	4	6.55	2.4e-13	0.88
ENSGACG00000001092	scaffold_150-25	scaffold_150	110890	111086	+	25	0.579	26	10.7	2	5.37	4.65e-05	0.98
ENSGACG00000001092	scaffold_150-16	scaffold_150	115262	115458	+	54	0.679	57	23.2	1	23.19	1.48e-23	0.95
ENSGACG00000001092	scaffold_150-26	scaffold_150	116181	116377	+	25	0.655	26	10.7	1	10.74	1.11e-07	0.98
ENSGACG00000001093	scaffold_150-26	scaffold_150	116181	116377	+	25	0.655	26	10.7	1	10.74	1.11e-07	0.98
ENSGACG00000001093	scaffold_150-15	scaffold_150	119477	119673	+	58	0.711	59	24.9	3	8.3	2.57e-14	0.9
ENSGACG00000001095	scaffold_121-2	scaffold_121	167131	167327	+	67	0.638	73	28.8	2	14.39	1.28e-22	0.84
ENSGACG00000001096	scaffold_150-15	scaffold_150	119477	119673	+	58	0.711	59	24.9	3	8.3	2.57e-14	0.9
ENSGACG00000001097	scaffold_150-19	scaffold_150	129778	129974	+	45	0.806	49	19.3	0.5	38.66	9.51e-24	1.02
ENSGACG00000001098	scaffold_150-19	scaffold_150	129778	129974	+	45	0.806	49	19.3	0.5	38.66	9.51e-24	1.02
ENSGACG00000001098	scaffold_150-9	scaffold_150	144355	144551	+	66	0.818	66	28.3	4	7.09	5.02e-15	0.9
ENSGACG00000001098	scaffold_150-27	scaffold_150	143217	143413	+	24	0.676	25	10.3	0.5	20.62	1.63e-10	0.91
ENSGACG00000001099	scaffold_121-7	scaffold_121	198699	198895	+	35	0.61	36	15	3	5.01	6.7e-07	0.9
ENSGACG00000001099	scaffold_121-9	scaffold_121	201351	201547	+	32	0.718	32	13.7	3	4.58	1.61e-05	0.93
ENSGACG00000001099	scaffold_121-12	scaffold_121	202177	202373	+	30	0.545	31	12.9	3	4.3	7.14e-05	0.9
ENSGACG00000001100	scaffold_129-16	scaffold_129	21196	21392	+	39	0.684	40	16.8	3	5.58	1.24e-07	0.97
ENSGACG00000001100	scaffold_129-19	scaffold_129	6745	6941	+	32	0.75	33	13.7	2	6.87	2.07e-07	0.93
ENSGACG00000001100	scaffold_129-25	scaffold_129	21818	22014	+	20	0.656	22	8.6	0.5	17.18	5.88e-08	0.96
ENSGACG00000001102	scaffold_121-5	scaffold_121	245846	246042	+	45	0.677	46	19.3	0.5	38.66	9.51e-24	0.92
ENSGACG00000001102	scaffold_121-13	scaffold_121	245476	245672	+	31	0.632	31	13.3	2	6.66	2.07e-07	1
ENSGACG00000001102	scaffold_121-10	scaffold_121	247812	248008	+	31	0.69	32	13.3	1	13.31	6.36e-11	0.96
ENSGACG00000001103	scaffold_150-9	scaffold_150	144355	144551	+	66	0.818	66	28.3	4	7.09	5.02e-15	0.9
ENSGACG00000001103	scaffold_150-27	scaffold_150	143217	143413	+	24	0.676	25	10.3	0.5	20.62	1.63e-10	0.91
ENSGACG00000001103	scaffold_150-12	scaffold_150	162962	163158	+	61	0.594	64	26.2	6	4.37	1.34e-09	0.9
ENSGACG00000001103	scaffold_150-21	scaffold_150	154522	154718	+	33	0.577	35	14.2	4	3.54	7.63e-05	0.96
ENSGACG00000001105	scaffold_150-12	scaffold_150	162962	163158	+	61	0.594	64	26.2	6	4.37	1.34e-09	0.9
ENSGACG00000001105	scaffold_150-7	scaffold_150	163454	163650	+	69	0.631	70	29.6	8	3.7	7.97e-09	0.91
ENSGACG00000001106	scaffold_129-16	scaffold_129	21196	21392	+	39	0.684	40	16.8	3	5.58	1.24e-07	0.97
ENSGACG00000001106	scaffold_129-25	scaffold_129	21818	22014	+	20	0.656	22	8.6	0.5	17.18	5.88e-08	0.96
ENSGACG00000001106	scaffold_129-2	scaffold_129	32868	33064	+	100	0.708	102	43	6	7.16	9.86e-22	0.92
ENSGACG00000001108	scaffold_150-2	scaffold_150	176037	176233	+	107	0.771	106	46	5	9.19	1.8e-27	0.91
ENSGACG00000001108	scaffold_150-3	scaffold_150	176382	176578	+	103	0.63	105	44.2	2	22.12	9.37e-43	0.83
ENSGACG00000001108	scaffold_150-8	scaffold_150	177081	177277	+	66	0.733	67	28.3	2	14.17	1.28e-22	0.9
ENSGACG00000001108	scaffold_150-10	scaffold_150	187460	187656	+	63	0.698	65	27.5	5	5.5	5.6e-12	0.93
ENSGACG00000001109	scaffold_221-6	scaffold_221	22603	22799	+	33	0.971	33	14.2	0.5	28.35	4.25e-16	1.02
ENSGACG00000001109	scaffold_221-1	scaffold_221	51945	52141	+	71	0.596	71	30.5	2	15.25	5.86e-25	0.89
ENSGACG00000001109	scaffold_221-3	scaffold_221	44360	44556	+	62	0.586	67	26.6	1	26.63	9.47e-28	0.89
ENSGACG00000001111	scaffold_129-2	scaffold_129	32868	33064	+	100	0.708	102	43	6	7.16	9.86e-22	0.92
ENSGACG00000001111	scaffold_129-9	scaffold_129	36478	36674	+	59	0.773	60	25.3	7	3.62	1.07e-07	0.9
ENSGACG00000001112	scaffold_27-117	scaffold_27	3197091	3197287	+	59	0.679	60	25.3	5	5.07	1.6e-10	0.95
ENSGACG00000001112	scaffold_27-166	scaffold_27	3196484	3196680	+	50	0.602	50	21.5	1	21.48	7.54e-21	0.93
ENSGACG00000001113	scaffold_129-9	scaffold_129	36478	36674	+	59	0.773	60	25.3	7	3.62	1.07e-07	0.9
ENSGACG00000001116	scaffold_121-3	scaffold_121	283145	283341	+	50	0.815	51	21.5	4	5.37	1.92e-09	0.91
ENSGACG00000001118	scaffold_622-1	scaffold_622	534	730	+	53	0.775	52	22.8	3	7.59	1.6e-12	0.96
ENSGACG00000001118	scaffold_622-3	scaffold_622	3970	4166	+	16	0.75	17	6.9	0.5	13.74	1.32e-05	0.97
ENSGACG00000001120	scaffold_221-1	scaffold_221	51945	52141	+	71	0.596	71	30.5	2	15.25	5.86e-25	0.89
ENSGACG00000001120	scaffold_221-4	scaffold_221	72956	73152	+	43	0.732	45	18.5	1	18.47	6.06e-17	0.9
ENSGACG00000001120	scaffold_221-5	scaffold_221	72562	72758	+	35	0.865	35	15	2	7.52	3.87e-09	0.9
ENSGACG00000001122	scaffold_121-1	scaffold_121	312252	312448	+	183	0.873	173	78.6	3	26.2	7.51e-80	0.9
ENSGACG00000001123	scaffold_129-23	scaffold_129	52091	52287	+	26	0.605	27	11.2	1	11.17	1e-08	0.94
ENSGACG00000001124	scaffold_150-10	scaffold_150	187460	187656	+	63	0.698	65	27.5	5	5.5	5.6e-12	0.93
ENSGACG00000001125	scaffold_129-23	scaffold_129	52091	52287	+	26	0.605	27	11.2	1	11.17	1e-08	0.94
ENSGACG00000001125	scaffold_129-6	scaffold_129	57418	57614	+	89	0.732	87	38.2	1	38.23	7.22e-46	0.91
ENSGACG00000001126	scaffold_121-1	scaffold_121	312252	312448	+	183	0.873	173	78.6	3	26.2	7.51e-80	0.9
ENSGACG00000001126	scaffold_121-8	scaffold_121	371328	371524	+	32	0.652	33	13.7	2	6.87	2.07e-07	0.9
ENSGACG00000001126	scaffold_121-16	scaffold_121	336206	336402	+	26	0.8	26	11.2	1	11.17	1e-08	0.94
ENSGACG00000001131	scaffold_129-6	scaffold_129	57418	57614	+	89	0.732	87	38.2	1	38.23	7.22e-46	0.91
ENSGACG00000001132	scaffold_129-13	scaffold_129	59593	59789	+	44	0.768	46	18.9	3	6.3	3.57e-09	0.88
ENSGACG00000001134	scaffold_27-166	scaffold_27	3196484	3196680	+	50	0.602	50	21.5	1	21.48	7.54e-21	0.93
ENSGACG00000001138	scaffold_146-3	scaffold_146	14562	14758	+	99	0.871	100	42.5	8	5.32	2.49e-17	0.9
ENSGACG00000001138	scaffold_146-7	scaffold_146	9527	9723	+	48	0.633	49	21	1	21.05	7.54e-21	0.96
ENSGACG00000001139	scaffold_237-2	scaffold_237	1621	1817	+	74	0.714	75	31.8	3	10.59	4.13e-21	0.93
ENSGACG00000001139	scaffold_237-3	scaffold_237	112	308	+	56	0.775	57	24.1	3	8.02	2.57e-14	0.93
ENSGACG00000001142	scaffold_237-4	scaffold_237	12687	12883	+	49	0.686	51	21	2	10.52	6.11e-15	0.93
ENSGACG00000001143	scaffold_27-52	scaffold_27	3222048	3222244	+	85	0.758	84	36.5	6	6.08	8.2e-17	0.91
ENSGACG00000001143	scaffold_27-175	scaffold_27	3218849	3219045	+	49	0.653	49	21	4	5.26	1.92e-09	0.93
ENSGACG00000001143	scaffold_27-318	scaffold_27	3210006	3210202	+	29	0.588	31	12.9	3	4.3	7.14e-05	0.93
ENSGACG00000001143	scaffold_27-407	scaffold_27	3218372	3218568	+	26	0.727	26	11.2	0.5	22.33	7.42e-12	0.91
ENSGACG00000001144	scaffold_129-3	scaffold_129	86824	87020	+	91	0.624	95	39.5	4	9.88	3.01e-25	0.87
ENSGACG00000001145	scaffold_237-4	scaffold_237	12687	12883	+	49	0.686	51	21	2	10.52	6.11e-15	0.93
ENSGACG00000001145	scaffold_237-1	scaffold_237	13072	13268	+	93	0.77	105	39.9	1	39.94	1.85e-47	0.89
ENSGACG00000001145	scaffold_237-8	scaffold_237	22326	22522	+	24	0.585	25	10.3	1	10.31	1.11e-07	0.95
ENSGACG00000001145	scaffold_237-9	scaffold_237	13670	13866	+	19	0.633	22	8.2	1	8.16	1.02e-05	0.96
ENSGACG00000001147	scaffold_129-3	scaffold_129	86824	87020	+	91	0.624	95	39.5	4	9.88	3.01e-25	0.87
ENSGACG00000001147	scaffold_129-11	scaffold_129	87465	87661	+	54	0.692	55	23.2	4	5.8	5.97e-11	0.97
ENSGACG00000001148	scaffold_146-3	scaffold_146	14562	14758	+	99	0.871	100	42.5	8	5.32	2.49e-17	0.9
ENSGACG00000001148	scaffold_146-1	scaffold_146	30488	30684	+	154	0.791	152	66.6	3	22.19	2.96e-63	0.81
ENSGACG00000001148	scaffold_146-2	scaffold_146	30001	30197	+	119	0.719	119	51.1	2	25.56	2.04e-52	0.84
ENSGACG00000001149	scaffold_237-8	scaffold_237	22326	22522	+	24	0.585	25	10.3	1	10.31	1.11e-07	0.95
ENSGACG00000001150	scaffold_237-6	scaffold_237	51867	52063	+	41	0.722	42	17.6	3	5.87	2.16e-08	0.87
ENSGACG00000001151	scaffold_27-52	scaffold_27	3222048	3222244	+	85	0.758	84	36.5	6	6.08	8.2e-17	0.91
ENSGACG00000001151	scaffold_27-181	scaffold_27	3231470	3231666	+	48	0.667	48	20.6	4	5.15	1.02e-08	0.89
ENSGACG00000001151	scaffold_27-269	scaffold_27	3227405	3227601	+	34	0.661	36	14.6	3	4.87	3.4e-06	0.93
ENSGACG00000001152	scaffold_218-1	scaffold_218	24544	24740	+	108	0.867	106	46.4	5	9.28	1.95e-28	0.9
ENSGACG00000001153	scaffold_237-6	scaffold_237	51867	52063	+	41	0.722	42	17.6	3	5.87	2.16e-08	0.87
ENSGACG00000001153	scaffold_237-5	scaffold_237	64597	64793	+	49	0.681	50	21	6	3.51	1.46e-06	0.93
ENSGACG00000001156	scaffold_27-181	scaffold_27	3231470	3231666	+	48	0.667	48	20.6	4	5.15	1.02e-08	0.89
ENSGACG00000001156	scaffold_27-94	scaffold_27	3239849	3240045	+	64	0.702	65	27.5	2	13.74	1.8e-21	0.9
ENSGACG00000001156	scaffold_27-210	scaffold_27	3233665	3233861	+	43	0.712	44	18.5	2	9.23	6.19e-12	0.98
ENSGACG00000001158	scaffold_129-1	scaffold_129	106053	106249	+	116	0.853	115	49.8	5	9.96	2.19e-31	0.86
ENSGACG00000001161	scaffold_129-1	scaffold_129	106053	106249	+	116	0.853	115	49.8	5	9.96	2.19e-31	0.86
ENSGACG00000001161	scaffold_129-8	scaffold_129	120464	120660	+	72	0.712	72	31.4	4	7.84	1.17e-17	0.96
ENSGACG00000001161	scaffold_129-14	scaffold_129	121140	121336	+	42	0.755	43	18	2	9.02	6.19e-12	0.86
ENSGACG00000001161	scaffold_129-17	scaffold_129	119016	119212	+	37	0.667	38	15.9	2	7.95	3.87e-09	0.92
ENSGACG00000001162	scaffold_218-1	scaffold_218	24544	24740	+	108	0.867	106	46.4	5	9.28	1.95e-28	0.9
ENSGACG00000001163	scaffold_218-3	scaffold_218	69821	70017	+	20	0.933	23	8.6	1	8.59	1.02e-05	0.96
ENSGACG00000001164	scaffold_27-94	scaffold_27	3239849	3240045	+	64	0.702	65	27.5	2	13.74	1.8e-21	0.9
ENSGACG00000001164	scaffold_27-304	scaffold_27	3240319	3240515	+	30	0.714	32	12.9	0.5	25.77	3.09e-13	0.9
ENSGACG00000001169	scaffold_129-15	scaffold_129	157855	158051	+	41	0.909	41	17.6	1	17.61	1.09e-15	0.89
ENSGACG00000001170	scaffold_146-4	scaffold_146	198000	198196	+	86	0.62	89	36.9	5	7.39	3.05e-19	0.89
ENSGACG00000001170	scaffold_146-6	scaffold_146	191025	191221	+	48	0.709	51	20.6	5	4.12	3.45e-07	0.89
ENSGACG00000001171	scaffold_27-56	scaffold_27	3253788	3253984	+	77	0.73	79	33.1	3	11.02	3.49e-23	0.88
ENSGACG00000001172	scaffold_146-4	scaffold_146	198000	198196	+	86	0.62	89	36.9	5	7.39	3.05e-19	0.89
ENSGACG00000001173	scaffold_129-15	scaffold_129	157855	158051	+	41	0.909	41	17.6	1	17.61	1.09e-15	0.89
ENSGACG00000001173	scaffold_129-7	scaffold_129	159171	159367	+	88	0.748	86	37.8	3	12.6	1.77e-27	0.93
ENSGACG00000001173	scaffold_129-4	scaffold_129	158411	158607	+	86	0.725	89	36.9	5	7.39	3.05e-19	0.92
ENSGACG00000001173	scaffold_129-18	scaffold_129	162023	162219	+	33	0.592	34	14.2	4	3.54	7.63e-05	0.93
ENSGACG00000001174	scaffold_218-2	scaffold_218	81335	81531	+	54	0.754	55	23.2	3	7.73	2.07e-13	0.86
ENSGACG00000001175	scaffold_129-18	scaffold_129	162023	162219	+	33	0.592	34	14.2	4	3.54	7.63e-05	0.93
ENSGACG00000001175	scaffold_129-5	scaffold_129	172260	172456	+	85	0.748	89	36.5	5	7.3	3.05e-19	0.93
ENSGACG00000001175	scaffold_129-12	scaffold_129	176097	176293	+	54	0.776	54	23.2	4	5.8	5.97e-11	0.93
ENSGACG00000001176	scaffold_27-56	scaffold_27	3253788	3253984	+	77	0.73	79	33.1	3	11.02	3.49e-23	0.88
ENSGACG00000001176	scaffold_27-148	scaffold_27	3254484	3254680	+	49	0.565	53	21	1	21.05	7.54e-21	0.86
ENSGACG00000001177	scaffold_129-5	scaffold_129	172260	172456	+	85	0.748	89	36.5	5	7.3	3.05e-19	0.93
ENSGACG00000001177	scaffold_129-12	scaffold_129	176097	176293	+	54	0.776	54	23.2	4	5.8	5.97e-11	0.93
ENSGACG00000001178	scaffold_1336-1	scaffold_1336	2060	2256	+	49	0.639	49	21	4	5.26	1.92e-09	0.91
ENSGACG00000001180	scaffold_129-10	scaffold_129	193179	193375	+	54	0.778	56	23.2	5	4.64	3.91e-09	0.92
ENSGACG00000001181	scaffold_129-10	scaffold_129	193179	193375	+	54	0.778	56	23.2	5	4.64	3.91e-09	0.92
ENSGACG00000001183	scaffold_27-156	scaffold_27	3279791	3279987	+	47	0.645	51	20.2	1	20.19	1.59e-19	0.96
ENSGACG00000001184	scaffold_285-2	scaffold_285	7653	7849	+	43	0.69	46	18.5	6	3.08	5.69e-05	0.93
ENSGACG00000001184	scaffold_285-4	scaffold_285	6940	7136	+	38	0.678	38	16.3	4	4.08	4.89e-06	0.89
ENSGACG00000001185	scaffold_285-2	scaffold_285	7653	7849	+	43	0.69	46	18.5	6	3.08	5.69e-05	0.93
ENSGACG00000001187	scaffold_349-1	scaffold_349	9891	10087	+	34	0.633	35	14.6	2	7.3	2.93e-08	0.9
ENSGACG00000001187	scaffold_349-2	scaffold_349	7111	7307	+	23	0.759	25	9.9	1	9.88	1.13e-06	0.99
ENSGACG00000001188	scaffold_27-111	scaffold_27	3289354	3289550	+	58	0.64	61	24.9	4	6.23	9.88e-12	0.92
ENSGACG00000001188	scaffold_27-182	scaffold_27	3288690	3288886	+	47	0.653	48	20.2	6	3.36	5.18e-06	0.88
ENSGACG00000001189	scaffold_129-20	scaffold_129	228907	229103	+	31	0.7	31	13.3	1	13.31	6.36e-11	0.96
ENSGACG00000001190	scaffold_285-1	scaffold_285	25525	25721	+	87	0.727	85	37.8	3	12.6	1.77e-27	0.9
ENSGACG00000001193	scaffold_27-111	scaffold_27	3289354	3289550	+	58	0.64	61	24.9	4	6.23	9.88e-12	0.92
ENSGACG00000001195	scaffold_27-111	scaffold_27	3289354	3289550	+	58	0.64	61	24.9	4	6.23	9.88e-12	0.92
ENSGACG00000001204	scaffold_181-3	scaffold_181	16437	16633	+	71	0.727	71	30.5	6	5.08	2.56e-12	0.9
ENSGACG00000001206	scaffold_27-205	scaffold_27	3390442	3390638	+	45	0.648	45	19.3	5	3.87	1.4e-06	0.88
ENSGACG00000001206	scaffold_27-229	scaffold_27	3389892	3390088	+	41	0.719	41	17.6	4	4.4	1.13e-06	0.93
ENSGACG00000001206	scaffold_27-270	scaffold_27	3402804	3403000	+	34	0.717	36	14.6	4	3.65	7.63e-05	0.87
ENSGACG00000001206	scaffold_27-428	scaffold_27	3412932	3413128	+	22	0.629	25	9.4	1	9.45	1.13e-06	0.91
ENSGACG00000001206	scaffold_27-550	scaffold_27	3435814	3436010	+	20	0.688	21	8.6	1	8.59	1.02e-05	0.96
ENSGACG00000001206	scaffold_27-670	scaffold_27	3404037	3404233	+	18	0.7	18	7.7	0.5	15.46	9.4e-07	0.96
ENSGACG00000001208	scaffold_27-205	scaffold_27	3390442	3390638	+	45	0.648	45	19.3	5	3.87	1.4e-06	0.88
ENSGACG00000001208	scaffold_27-229	scaffold_27	3389892	3390088	+	41	0.719	41	17.6	4	4.4	1.13e-06	0.93
ENSGACG00000001208	scaffold_27-270	scaffold_27	3402804	3403000	+	34	0.717	36	14.6	4	3.65	7.63e-05	0.87
ENSGACG00000001208	scaffold_27-428	scaffold_27	3412932	3413128	+	22	0.629	25	9.4	1	9.45	1.13e-06	0.91
ENSGACG00000001208	scaffold_27-670	scaffold_27	3404037	3404233	+	18	0.7	18	7.7	0.5	15.46	9.4e-07	0.96
ENSGACG00000001212	scaffold_293-2	scaffold_293	48110	48306	+	74	0.581	75	31.8	7	4.54	2.23e-11	0.91
ENSGACG00000001212	scaffold_293-3	scaffold_293	45190	45386	+	41	0.8	44	17.6	1	17.61	1.09e-15	0.91
ENSGACG00000001212	scaffold_293-1	scaffold_293	48797	48993	+	161	0.619	158	69.6	7	9.94	1.21e-43	0.83
ENSGACG00000001218	scaffold_181-6	scaffold_181	34123	34319	+	23	0.697	24	9.9	0.5	19.76	3.26e-09	0.91
ENSGACG00000001219	scaffold_27-130	scaffold_27	3498990	3499186	+	55	0.598	57	24.1	1	24.05	6.18e-25	0.86
ENSGACG00000001219	scaffold_27-230	scaffold_27	3497906	3498102	+	40	0.573	41	17.2	2	8.59	5.61e-11	0.89
ENSGACG00000001219	scaffold_27-408	scaffold_27	3500889	3501085	+	24	0.657	26	10.3	0.5	20.62	1.63e-10	0.99
ENSGACG00000001222	scaffold_27-211	scaffold_27	3524548	3524744	+	43	0.587	44	18.5	2	9.23	6.19e-12	0.88
ENSGACG00000001223	scaffold_349-1	scaffold_349	9891	10087	+	34	0.633	35	14.6	2	7.3	2.93e-08	0.9
ENSGACG00000001223	scaffold_349-2	scaffold_349	7111	7307	+	23	0.759	25	9.9	1	9.88	1.13e-06	0.99
ENSGACG00000001223	scaffold_349-3	scaffold_349	20872	21068	+	23	0.667	23	9.9	0.5	19.76	3.26e-09	0.91
ENSGACG00000001223	scaffold_349-4	scaffold_349	13281	13477	+	18	0.667	18	7.7	1	7.73	8.32e-05	0.91
ENSGACG00000001224	scaffold_148-1	scaffold_148	81692	81888	+	62	0.9	62	26.6	3	8.88	3.53e-16	0.98
ENSGACG00000001224	scaffold_148-6	scaffold_148	89454	89650	+	20	0.643	22	8.6	0.5	17.18	5.88e-08	0.91
ENSGACG00000001225	scaffold_181-6	scaffold_181	34123	34319	+	23	0.697	24	9.9	0.5	19.76	3.26e-09	0.91
ENSGACG00000001225	scaffold_181-1	scaffold_181	40817	41013	+	165	0.821	157	70.9	3	23.62	1.09e-68	0.83
ENSGACG00000001225	scaffold_181-2	scaffold_181	40286	40482	+	120	0.713	118	51.5	1	51.54	2.42e-67	0.88
ENSGACG00000001229	scaffold_27-28	scaffold_27	3536296	3536492	+	105	0.711	102	45.1	5	9.02	1.8e-27	0.87
ENSGACG00000001229	scaffold_27-319	scaffold_27	3536762	3536958	+	31	0.63	31	13.3	0.5	26.63	1.19e-14	0.93
ENSGACG00000001232	scaffold_181-1	scaffold_181	40817	41013	+	165	0.821	157	70.9	3	23.62	1.09e-68	0.83
ENSGACG00000001232	scaffold_181-2	scaffold_181	40286	40482	+	120	0.713	118	51.5	1	51.54	2.42e-67	0.88
ENSGACG00000001232	scaffold_181-4	scaffold_181	59099	59295	+	32	0.649	35	14.2	4	3.54	7.63e-05	0.99
ENSGACG00000001233	scaffold_181-4	scaffold_181	59099	59295	+	32	0.649	35	14.2	4	3.54	7.63e-05	0.99
ENSGACG00000001233	scaffold_181-8	scaffold_181	62901	63097	+	20	0.857	20	8.6	0.5	17.18	5.88e-08	0.91
ENSGACG00000001233	scaffold_181-12	scaffold_181	62402	62598	+	17	0.789	17	7.3	0.5	14.6	9.4e-07	1.1
ENSGACG00000001234	scaffold_148-6	scaffold_148	89454	89650	+	20	0.643	22	8.6	0.5	17.18	5.88e-08	0.91
ENSGACG00000001234	scaffold_148-2	scaffold_148	101570	101766	+	33	0.829	33	14.2	4	3.54	7.63e-05	0.99
ENSGACG00000001237	scaffold_27-28	scaffold_27	3536296	3536492	+	105	0.711	102	45.1	5	9.02	1.8e-27	0.87
ENSGACG00000001237	scaffold_27-319	scaffold_27	3536762	3536958	+	31	0.63	31	13.3	0.5	26.63	1.19e-14	0.93
ENSGACG00000001238	scaffold_181-15	scaffold_181	108928	109124	+	16	0.56	17	6.9	0.5	13.74	1.32e-05	0.9
ENSGACG00000001238	scaffold_181-13	scaffold_181	94676	94872	+	15	0.64	17	6.4	0.5	12.89	1.32e-05	0.9
ENSGACG00000001239	scaffold_891-1	scaffold_891	4477	4673	+	25	0.667	25	10.7	2	5.37	4.65e-05	0.94
ENSGACG00000001244	scaffold_891-1	scaffold_891	4477	4673	+	25	0.667	25	10.7	2	5.37	4.65e-05	0.94
ENSGACG00000001246	scaffold_27-39	scaffold_27	3550752	3550948	+	89	0.687	92	38.7	3	12.89	1.39e-28	0.88
ENSGACG00000001247	scaffold_27-39	scaffold_27	3550752	3550948	+	89	0.687	92	38.7	3	12.89	1.39e-28	0.88
ENSGACG00000001248	scaffold_27-105	scaffold_27	3556519	3556715	+	58	0.744	62	25.3	2	12.67	3.17e-19	0.98
ENSGACG00000001254	scaffold_27-105	scaffold_27	3556519	3556715	+	58	0.744	62	25.3	2	12.67	3.17e-19	0.98
ENSGACG00000001254	scaffold_27-37	scaffold_27	3556908	3557104	+	94	0.664	93	40.4	4	10.09	3.01e-26	0.89
ENSGACG00000001257	scaffold_274-2	scaffold_274	27303	27499	+	23	0.769	24	9.9	1	9.88	1.13e-06	0.95
ENSGACG00000001258	scaffold_274-2	scaffold_274	27303	27499	+	23	0.769	24	9.9	1	9.88	1.13e-06	0.95
ENSGACG00000001258	scaffold_274-1	scaffold_274	37862	38058	+	128	0.781	126	55	5	11	1.78e-36	0.82
ENSGACG00000001276	scaffold_27-137	scaffold_27	3579485	3579681	+	51	0.646	55	21.9	1	21.9	7.54e-21	0.91
ENSGACG00000001277	scaffold_337-1	scaffold_337	3979	4175	+	63	0.677	63	27.1	5	5.41	5.6e-12	0.92
ENSGACG00000001278	scaffold_27-137	scaffold_27	3579485	3579681	+	51	0.646	55	21.9	1	21.9	7.54e-21	0.91
ENSGACG00000001280	scaffold_27-673	scaffold_27	3592510	3592706	+	18	0.87	18	7.7	1	7.73	8.32e-05	0.91
ENSGACG00000001282	scaffold_249-2	scaffold_249	11013	11209	+	29	0.551	32	12.5	0.5	24.91	3.09e-13	0.9
ENSGACG00000001282	scaffold_249-3	scaffold_249	12879	13075	+	20	0.571	21	8.6	0.5	17.18	5.88e-08	0.91
ENSGACG00000001284	scaffold_130-1	scaffold_130	39710	39906	+	122	0.82	123	52.4	7	7.49	1.15e-27	0.91
ENSGACG00000001284	scaffold_130-6	scaffold_130	28847	29043	+	36	0.674	37	15.5	4	3.87	1.99e-05	0.92
ENSGACG00000001286	scaffold_27-673	scaffold_27	3592510	3592706	+	18	0.87	18	7.7	1	7.73	8.32e-05	0.91
ENSGACG00000001286	scaffold_27-47	scaffold_27	3597220	3597416	+	88	0.682	88	38.2	3	12.74	1.39e-28	0.86
ENSGACG00000001286	scaffold_27-118	scaffold_27	3593044	3593240	+	57	0.646	60	24.5	8	3.06	3.73e-06	0.91
ENSGACG00000001289	scaffold_130-2	scaffold_130	70317	70513	+	102	0.647	102	43.8	4	10.95	2.58e-29	0.88
ENSGACG00000001289	scaffold_130-5	scaffold_130	85101	85297	+	41	0.643	41	17.6	1	17.61	1.09e-15	0.93
ENSGACG00000001291	scaffold_130-5	scaffold_130	85101	85297	+	41	0.643	41	17.6	1	17.61	1.09e-15	0.93
ENSGACG00000001292	scaffold_27-47	scaffold_27	3597220	3597416	+	88	0.682	88	38.2	3	12.74	1.39e-28	0.86
ENSGACG00000001301	scaffold_130-3	scaffold_130	192370	192566	+	70	0.728	69	30.1	4	7.52	9.13e-17	0.93
ENSGACG00000001301	scaffold_130-7	scaffold_130	186217	186413	+	31	0.652	34	13.3	0.5	26.63	1.19e-14	0.93
ENSGACG00000001304	scaffold_156-4	scaffold_156	64558	64754	+	48	0.698	50	20.6	3	6.87	8.31e-11	0.91
ENSGACG00000001305	scaffold_130-3	scaffold_130	192370	192566	+	70	0.728	69	30.1	4	7.52	9.13e-17	0.93
ENSGACG00000001305	scaffold_130-4	scaffold_130	199204	199400	+	56	0.732	60	24.5	4	6.12	9.88e-12	0.93
ENSGACG00000001312	scaffold_27-14	scaffold_27	3800719	3800915	+	124	0.841	122	53.3	1	53.26	8.77e-71	0.93
ENSGACG00000001312	scaffold_27-63	scaffold_27	3796249	3796445	+	77	0.831	77	33.1	3	11.02	3.49e-23	0.85
ENSGACG00000001314	scaffold_156-1	scaffold_156	94095	94291	+	72	0.68	72	31.4	5	6.27	4.52e-15	0.9
ENSGACG00000001314	scaffold_156-5	scaffold_156	103942	104138	+	40	0.667	41	17.6	2	8.8	5.61e-11	0.89
ENSGACG00000001316	scaffold_156-1	scaffold_156	94095	94291	+	72	0.68	72	31.4	5	6.27	4.52e-15	0.9
ENSGACG00000001316	scaffold_156-5	scaffold_156	103942	104138	+	40	0.667	41	17.6	2	8.8	5.61e-11	0.89
ENSGACG00000001317	scaffold_27-14	scaffold_27	3800719	3800915	+	124	0.841	122	53.3	1	53.26	8.77e-71	0.93
ENSGACG00000001317	scaffold_27-63	scaffold_27	3796249	3796445	+	77	0.831	77	33.1	3	11.02	3.49e-23	0.85
ENSGACG00000001317	scaffold_27-119	scaffold_27	3830943	3831139	+	60	0.879	60	25.8	1	25.77	2.47e-26	0.95
ENSGACG00000001317	scaffold_27-112	scaffold_27	3841230	3841426	+	58	0.76	61	24.9	5	4.98	8.07e-10	0.94
ENSGACG00000001317	scaffold_27-142	scaffold_27	3830241	3830437	+	53	0.5	54	22.8	1	22.76	3.42e-22	0.89
ENSGACG00000001317	scaffold_27-199	scaffold_27	3827721	3827917	+	45	0.644	46	19.3	5	3.87	1.4e-06	0.92
ENSGACG00000001317	scaffold_27-217	scaffold_27	3833392	3833588	+	41	0.695	43	17.6	2	8.8	5.61e-11	0.86
ENSGACG00000001317	scaffold_27-388	scaffold_27	3828789	3828985	+	26	0.645	27	11.6	2	5.8	8.31e-06	0.91
ENSGACG00000001317	scaffold_27-723	scaffold_27	3814998	3815194	+	16	0.64	17	6.9	0.5	13.74	1.32e-05	0.97
ENSGACG00000001333	scaffold_115-19	scaffold_115	37450	37646	+	17	0.667	18	7.3	1	7.3	8.32e-05	0.91
ENSGACG00000001336	scaffold_27-119	scaffold_27	3830943	3831139	+	60	0.879	60	25.8	1	25.77	2.47e-26	0.95
ENSGACG00000001336	scaffold_27-112	scaffold_27	3841230	3841426	+	58	0.76	61	24.9	5	4.98	8.07e-10	0.94
ENSGACG00000001336	scaffold_27-217	scaffold_27	3833392	3833588	+	41	0.695	43	17.6	2	8.8	5.61e-11	0.86
ENSGACG00000001336	scaffold_27-236	scaffold_27	3854068	3854264	+	40	0.629	40	17.2	3	5.73	2.16e-08	0.94
ENSGACG00000001336	scaffold_27-409	scaffold_27	3854553	3854749	+	26	0.824	26	11.2	1	11.17	1e-08	1.02
ENSGACG00000001336	scaffold_27-625	scaffold_27	3852804	3853000	+	19	0.567	19	8.2	1	8.16	1.02e-05	0.96
ENSGACG00000001338	scaffold_156-3	scaffold_156	122746	122942	+	52	0.8	51	22.3	4	5.58	3.46e-10	0.94
ENSGACG00000001339	scaffold_115-16	scaffold_115	81626	81822	+	20	0.857	20	8.6	1	8.59	1.02e-05	0.91
ENSGACG00000001343	scaffold_115-13	scaffold_115	145222	145418	+	21	0.733	22	9	1	9.02	1.13e-06	0.91
ENSGACG00000001351	scaffold_115-13	scaffold_115	145222	145418	+	21	0.733	22	9	1	9.02	1.13e-06	0.91
ENSGACG00000001352	scaffold_27-587	scaffold_27	3880800	3880996	+	19	0.548	20	8.2	1	8.16	1.02e-05	0.91
ENSGACG00000001354	scaffold_156-2	scaffold_156	164371	164567	+	71	0.783	70	30.9	6	5.15	2.56e-12	0.9
ENSGACG00000001355	scaffold_239-1	scaffold_239	21821	22017	+	74	0.658	77	31.8	5	6.36	4.52e-15	0.88
ENSGACG00000001360	scaffold_115-2	scaffold_115	155590	155786	+	58	0.651	60	24.9	4	6.23	9.88e-12	0.94
ENSGACG00000001360	scaffold_115-9	scaffold_115	173948	174144	+	29	0.651	29	12.9	3	4.3	7.14e-05	0.9
ENSGACG00000001363	scaffold_115-9	scaffold_115	173948	174144	+	29	0.651	29	12.9	3	4.3	7.14e-05	0.9
ENSGACG00000001365	scaffold_27-36	scaffold_27	3892927	3893123	+	94	0.587	94	40.4	2	20.19	1.92e-37	0.87
ENSGACG00000001365	scaffold_27-321	scaffold_27	3898094	3898290	+	30	0.596	31	12.9	2	6.44	1.36e-06	0.93
ENSGACG00000001366	scaffold_239-2	scaffold_239	48312	48508	+	60	0.806	61	25.8	3	8.59	3.07e-15	0.9
ENSGACG00000001366	scaffold_239-6	scaffold_239	39251	39447	+	28	0.714	28	12	0.5	24.05	3.09e-13	0.94
ENSGACG00000001366	scaffold_239-5	scaffold_239	46948	47144	+	27	0.683	29	11.6	2	5.8	8.31e-06	0.98
ENSGACG00000001366	scaffold_239-8	scaffold_239	35865	36061	+	25	0.846	25	10.7	2	5.37	4.65e-05	0.91
ENSGACG00000001371	scaffold_156-2	scaffold_156	164371	164567	+	71	0.783	70	30.9	6	5.15	2.56e-12	0.9
ENSGACG00000001371	scaffold_156-8	scaffold_156	167921	168117	+	31	0.765	31	13.3	1	13.31	6.36e-11	1
ENSGACG00000001373	scaffold_27-306	scaffold_27	4073172	4073368	+	30	0.611	32	12.9	2	6.44	1.36e-06	0.9
ENSGACG00000001373	scaffold_27-430	scaffold_27	4072708	4072904	+	24	0.684	25	10.7	1	10.74	1.11e-07	0.91
ENSGACG00000001374	scaffold_186-1	scaffold_186	83130	83326	+	94	0.867	93	40.4	1	40.37	4.62e-49	0.87
ENSGACG00000001374	scaffold_186-2	scaffold_186	60751	60947	+	88	0.772	87	37.8	1	37.8	2.75e-44	0.89
ENSGACG00000001374	scaffold_186-3	scaffold_186	58875	59071	+	61	0.626	63	26.2	4	6.55	2.4e-13	0.9
ENSGACG00000001374	scaffold_186-6	scaffold_186	60136	60332	+	49	0.603	51	21	0.5	42.09	5.66e-27	0.91
ENSGACG00000001376	scaffold_194-1	scaffold_194	469	665	+	87	0.826	89	37.8	9	4.2	2.38e-12	0.88
ENSGACG00000001377	scaffold_186-1	scaffold_186	83130	83326	+	94	0.867	93	40.4	1	40.37	4.62e-49	0.87
ENSGACG00000001379	scaffold_111-9	scaffold_111	38	234	+	52	0.828	52	22.3	1	22.33	3.42e-22	0.96
ENSGACG00000001381	scaffold_186-5	scaffold_186	90280	90476	+	58	0.747	59	24.9	6	4.15	2.48e-08	0.96
ENSGACG00000001382	scaffold_27-26	scaffold_27	4132293	4132489	+	104	0.597	103	44.7	3	14.89	1.98e-35	0.89
ENSGACG00000001382	scaffold_27-48	scaffold_27	4133198	4133394	+	87	0.726	88	37.4	3	12.46	1.77e-27	0.87
ENSGACG00000001382	scaffold_27-69	scaffold_27	4106672	4106868	+	72	0.545	73	31.4	3	10.45	4.13e-21	0.89
ENSGACG00000001382	scaffold_27-255	scaffold_27	4108877	4109073	+	34	0.547	38	15	1	15.03	3e-13	0.93
ENSGACG00000001388	scaffold_111-9	scaffold_111	38	234	+	52	0.828	52	22.3	1	22.33	3.42e-22	0.96
ENSGACG00000001389	scaffold_186-4	scaffold_186	121449	121645	+	62	0.648	63	26.6	4	6.66	2.4e-13	0.94
ENSGACG00000001392	scaffold_27-48	scaffold_27	4133198	4133394	+	87	0.726	88	37.4	3	12.46	1.77e-27	0.87
ENSGACG00000001397	scaffold_115-4	scaffold_115	257306	257502	+	37	0.702	38	15.9	3	5.3	6.7e-07	0.87
ENSGACG00000001402	scaffold_115-3	scaffold_115	282960	283156	+	47	0.725	52	20.2	5	4.04	3.45e-07	0.94
ENSGACG00000001402	scaffold_115-10	scaffold_115	283491	283687	+	24	0.96	24	10.3	1	10.31	1.11e-07	0.99
ENSGACG00000001405	scaffold_219-1	scaffold_219	54305	54501	+	319	0.898	283	137	3	45.67	2.36e-171	0.78
ENSGACG00000001405	scaffold_219-2	scaffold_219	53675	53871	+	253	0.639	239	109.1	5	21.82	7.53e-103	0.78
ENSGACG00000001405	scaffold_219-8	scaffold_219	19257	19453	+	56	0.895	56	24.1	1	24.05	6.18e-25	0.86
ENSGACG00000001405	scaffold_219-9	scaffold_219	24888	25084	+	50	0.676	51	21.5	1	21.48	7.54e-21	0.89
ENSGACG00000001405	scaffold_219-11	scaffold_219	18762	18958	+	41	0.76	41	17.6	4	4.4	1.13e-06	0.96
ENSGACG00000001405	scaffold_219-12	scaffold_219	26377	26573	+	32	0.596	33	13.7	3	4.58	1.61e-05	1.03
ENSGACG00000001405	scaffold_219-16	scaffold_219	18202	18398	+	24	0.808	25	10.3	2	5.15	4.65e-05	0.91
ENSGACG00000001405	scaffold_219-19	scaffold_219	46421	46617	+	17	0.722	17	7.3	0.5	14.6	9.4e-07	0.91
ENSGACG00000001408	scaffold_111-7	scaffold_111	43223	43419	+	53	0.672	54	22.8	4	5.69	3.46e-10	0.92
ENSGACG00000001408	scaffold_111-14	scaffold_111	24004	24200	+	41	0.767	43	17.6	4	4.4	1.13e-06	0.87
ENSGACG00000001408	scaffold_111-17	scaffold_111	39908	40104	+	34	0.81	35	14.6	1	14.6	4.52e-12	0.99
ENSGACG00000001411	scaffold_115-3	scaffold_115	282960	283156	+	47	0.725	52	20.2	5	4.04	3.45e-07	0.94
ENSGACG00000001411	scaffold_115-10	scaffold_115	283491	283687	+	24	0.96	24	10.3	1	10.31	1.11e-07	0.99
ENSGACG00000001411	scaffold_115-5	scaffold_115	309658	309854	+	31	0.721	34	13.3	3	4.44	1.61e-05	0.93
ENSGACG00000001413	scaffold_219-1	scaffold_219	54305	54501	+	319	0.898	283	137	3	45.67	2.36e-171	0.78
ENSGACG00000001413	scaffold_219-2	scaffold_219	53675	53871	+	253	0.639	239	109.1	5	21.82	7.53e-103	0.78
ENSGACG00000001413	scaffold_219-3	scaffold_219	68580	68776	+	145	0.67	143	62.3	1	62.28	1.19e-86	0.85
ENSGACG00000001413	scaffold_219-4	scaffold_219	67765	67961	+	118	0.821	118	50.7	2	25.34	5.21e-51	0.87
ENSGACG00000001413	scaffold_219-5	scaffold_219	64106	64302	+	66	0.853	66	28.3	2	14.17	1.28e-22	0.87
ENSGACG00000001413	scaffold_219-7	scaffold_219	64703	64899	+	58	0.734	57	25.3	1	25.34	2.47e-26	0.96
ENSGACG00000001413	scaffold_219-10	scaffold_219	65148	65344	+	50	0.694	50	21.5	0.5	42.95	5.66e-27	0.93
ENSGACG00000001413	scaffold_219-6	scaffold_219	74451	74647	+	55	0.687	58	23.6	3	7.87	2.07e-13	0.9
ENSGACG00000001413	scaffold_219-13	scaffold_219	75833	76029	+	29	0.61	30	12.5	3	4.15	7.14e-05	0.9
ENSGACG00000001415	scaffold_115-5	scaffold_115	309658	309854	+	31	0.721	34	13.3	3	4.44	1.61e-05	0.93
ENSGACG00000001415	scaffold_115-1	scaffold_115	314342	314538	+	101	0.631	103	43.4	4	10.84	2.58e-29	0.83
ENSGACG00000001417	groupXVI-76	groupXVI	19603	19799	+	86	0.777	87	37.4	3	12.46	1.77e-27	0.94
ENSGACG00000001422	groupXVI-503	groupXVI	45513	45709	+	34	0.689	35	14.6	4	3.65	7.63e-05	0.96
ENSGACG00000001424	groupXVI-503	groupXVI	45513	45709	+	34	0.689	35	14.6	4	3.65	7.63e-05	0.96
ENSGACG00000001427	groupXVI-577	groupXVI	78357	78553	+	32	0.97	32	13.7	1	13.74	6.36e-11	0.96
ENSGACG00000001431	groupXVI-107	groupXVI	97382	97578	+	76	0.67	76	32.6	8	4.08	1.33e-10	0.89
ENSGACG00000001437	scaffold_27-286	scaffold_27	4175380	4175576	+	32	0.787	34	13.7	3	4.58	1.61e-05	0.96
ENSGACG00000001438	groupXVI-77	groupXVI	143973	144169	+	82	0.68	86	35.2	5	7.04	2.2e-18	0.95
ENSGACG00000001440	scaffold_269-1	scaffold_269	5546	5742	+	82	0.771	83	35.2	8	4.4	1.69e-12	0.87
ENSGACG00000001443	scaffold_111-12	scaffold_111	132502	132698	+	50	0.797	51	21.5	7	3.07	1.45e-05	0.89
ENSGACG00000001443	scaffold_111-15	scaffold_111	115279	115475	+	42	0.647	42	18	5	3.61	5.42e-06	0.91
ENSGACG00000001446	groupXVI-77	groupXVI	143973	144169	+	82	0.68	86	35.2	5	7.04	2.2e-18	0.95
ENSGACG00000001450	groupXVI-528	groupXVI	177582	177778	+	33	0.64	34	14.2	4	3.54	7.63e-05	0.96
ENSGACG00000001450	groupXVI-670	groupXVI	198877	199073	+	28	0.705	29	12	1	12.03	8.32e-10	0.97
ENSGACG00000001452	scaffold_111-1	scaffold_111	147285	147481	+	82	0.771	84	35.2	3	11.74	2.63e-25	0.91
ENSGACG00000001455	groupXVI-11	groupXVI	255188	255384	+	147	0.686	142	63.6	0.5	127.13	3.32e-107	0.85
ENSGACG00000001455	groupXVI-13	groupXVI	235213	235409	+	145	0.719	141	62.3	1	62.28	1.19e-86	0.83
ENSGACG00000001455	groupXVI-12	groupXVI	255785	255981	+	145	0.536	142	62.3	5	12.46	5.04e-45	0.82
ENSGACG00000001455	groupXVI-62	groupXVI	246665	246861	+	94	0.813	93	40.8	5	8.16	8.55e-23	0.85
ENSGACG00000001455	groupXVI-127	groupXVI	254637	254833	+	68	0.658	70	29.2	4	7.3	6.88e-16	0.88
ENSGACG00000001456	groupXVI-11	groupXVI	255188	255384	+	147	0.686	142	63.6	0.5	127.13	3.32e-107	0.85
ENSGACG00000001456	groupXVI-12	groupXVI	255785	255981	+	145	0.536	142	62.3	5	12.46	5.04e-45	0.82
ENSGACG00000001456	groupXVI-62	groupXVI	246665	246861	+	94	0.813	93	40.8	5	8.16	8.55e-23	0.85
ENSGACG00000001456	groupXVI-127	groupXVI	254637	254833	+	68	0.658	70	29.2	4	7.3	6.88e-16	0.88
ENSGACG00000001458	scaffold_273-1	scaffold_273	10104	10300	+	53	0.815	53	22.8	6	3.79	3.91e-07	1.03
ENSGACG00000001460	scaffold_111-3	scaffold_111	153878	154074	+	72	0.737	72	30.9	4	7.73	9.13e-17	0.88
ENSGACG00000001460	scaffold_111-13	scaffold_111	151660	151856	+	48	0.71	45	20.6	6	3.44	5.18e-06	1.11
ENSGACG00000001461	scaffold_111-3	scaffold_111	153878	154074	+	72	0.737	72	30.9	4	7.73	9.13e-17	0.88
ENSGACG00000001461	scaffold_111-11	scaffold_111	162836	163032	+	49	0.68	52	21	4	5.26	1.92e-09	0.95
ENSGACG00000001461	scaffold_111-16	scaffold_111	162153	162349	+	37	0.586	38	15.9	2	7.95	3.87e-09	0.97
ENSGACG00000001463	groupXVI-386	groupXVI	309805	310001	+	40	0.722	40	17.2	2	8.59	5.61e-11	0.94
ENSGACG00000001463	groupXVI-483	groupXVI	308302	308498	+	35	0.821	36	15	3	5.01	6.7e-07	0.9
ENSGACG00000001464	scaffold_111-11	scaffold_111	162836	163032	+	49	0.68	52	21	4	5.26	1.92e-09	0.95
ENSGACG00000001464	scaffold_111-5	scaffold_111	185344	185540	+	58	0.653	59	25.3	4	6.34	1.57e-12	0.96
ENSGACG00000001465	scaffold_269-3	scaffold_269	17407	17603	+	61	0.774	63	26.2	0.5	52.4	2.24e-35	0.9
ENSGACG00000001466	scaffold_27-18	scaffold_27	4198050	4198246	+	115	0.677	117	49.4	8	6.17	1.17e-22	0.81
ENSGACG00000001466	scaffold_27-74	scaffold_27	4197653	4197849	+	70	0.709	71	30.9	4	7.73	9.13e-17	0.95
ENSGACG00000001468	scaffold_111-5	scaffold_111	185344	185540	+	58	0.653	59	25.3	4	6.34	1.57e-12	0.96
ENSGACG00000001468	scaffold_111-4	scaffold_111	198885	199081	+	63	0.744	64	27.1	4	6.76	3.53e-14	0.99
ENSGACG00000001469	scaffold_111-4	scaffold_111	198885	199081	+	63	0.744	64	27.1	4	6.76	3.53e-14	0.99
ENSGACG00000001470	scaffold_269-4	scaffold_269	24723	24919	+	40	0.745	40	17.2	0.5	34.36	1.3e-20	0.91
ENSGACG00000001471	scaffold_111-6	scaffold_111	201504	201700	+	59	0.884	59	25.3	8	3.17	1.17e-06	0.87
ENSGACG00000001472	scaffold_273-3	scaffold_273	33460	33656	+	48	0.712	50	20.6	5	4.12	3.45e-07	0.91
ENSGACG00000001472	scaffold_273-4	scaffold_273	34217	34413	+	29	0.705	30	12.5	3	4.15	7.14e-05	0.9
ENSGACG00000001473	scaffold_27-18	scaffold_27	4198050	4198246	+	115	0.677	117	49.4	8	6.17	1.17e-22	0.81
ENSGACG00000001473	scaffold_27-74	scaffold_27	4197653	4197849	+	70	0.709	71	30.9	4	7.73	9.13e-17	0.95
ENSGACG00000001473	scaffold_27-20	scaffold_27	4205777	4205973	+	108	0.69	110	46.4	1	46.39	6.83e-59	0.98
ENSGACG00000001473	scaffold_27-232	scaffold_27	4200653	4200849	+	41	0.569	41	17.6	0.5	35.22	1.3e-20	0.91
ENSGACG00000001473	scaffold_27-256	scaffold_27	4201249	4201445	+	38	0.755	38	16.3	0.5	32.64	4.42e-19	0.94
ENSGACG00000001473	scaffold_27-629	scaffold_27	4202576	4202772	+	18	0.577	19	7.7	1	7.73	8.32e-05	0.91
ENSGACG00000001474	scaffold_273-4	scaffold_273	34217	34413	+	29	0.705	30	12.5	3	4.15	7.14e-05	0.9
ENSGACG00000001474	scaffold_273-6	scaffold_273	37667	37863	+	17	0.533	19	7.3	1	7.3	8.32e-05	0.91
ENSGACG00000001476	scaffold_27-7	scaffold_27	4226780	4226976	+	159	0.703	154	68.7	8	8.59	3.93e-39	0.83
ENSGACG00000001477	scaffold_27-7	scaffold_27	4226780	4226976	+	159	0.703	154	68.7	8	8.59	3.93e-39	0.83
ENSGACG00000001478	scaffold_27-553	scaffold_27	4244400	4244596	+	21	0.69	21	9	1	9.02	1.13e-06	0.95
ENSGACG00000001479	scaffold_111-2	scaffold_111	237565	237761	+	78	0.704	80	33.5	2	16.75	1.42e-28	0.91
ENSGACG00000001481	scaffold_120-5	scaffold_120	6388	6584	+	82	0.798	84	35.2	0.5	70.44	1.71e-51	0.91
ENSGACG00000001483	scaffold_27-75	scaffold_27	4260740	4260936	+	71	0.677	71	30.5	5	6.1	2.82e-14	0.89
ENSGACG00000001484	scaffold_120-12	scaffold_120	16509	16705	+	41	0.771	42	17.6	2	8.8	5.61e-11	0.93
ENSGACG00000001486	scaffold_27-75	scaffold_27	4260740	4260936	+	71	0.677	71	30.5	5	6.1	2.82e-14	0.89
ENSGACG00000001486	scaffold_27-6	scaffold_27	4273345	4273541	+	164	0.856	158	70.9	5	14.17	5.13e-54	0.88
ENSGACG00000001487	scaffold_269-4	scaffold_269	24723	24919	+	40	0.745	40	17.2	0.5	34.36	1.3e-20	0.91
ENSGACG00000001487	scaffold_269-5	scaffold_269	29858	30054	+	39	0.706	39	16.8	4	4.19	4.89e-06	0.87
ENSGACG00000001487	scaffold_269-6	scaffold_269	30927	31123	+	34	0.593	36	14.6	1	14.6	4.52e-12	0.9
ENSGACG00000001487	scaffold_269-7	scaffold_269	34563	34759	+	31	0.667	33	13.3	2	6.66	2.07e-07	1.04
ENSGACG00000001488	groupXVI-386	groupXVI	309805	310001	+	40	0.722	40	17.2	2	8.59	5.61e-11	0.94
ENSGACG00000001490	scaffold_27-6	scaffold_27	4273345	4273541	+	164	0.856	158	70.9	5	14.17	5.13e-54	0.88
ENSGACG00000001491	groupXVI-504	groupXVI	318365	318561	+	34	0.691	35	14.6	2	7.3	2.93e-08	0.87
ENSGACG00000001498	scaffold_27-57	scaffold_27	4293886	4294082	+	78	0.798	79	33.5	3	11.17	3.49e-23	0.86
ENSGACG00000001499	scaffold_120-3	scaffold_120	23244	23440	+	105	0.825	105	45.1	6	7.52	2.48e-24	0.84
ENSGACG00000001500	scaffold_27-57	scaffold_27	4293886	4294082	+	78	0.798	79	33.5	3	11.17	3.49e-23	0.86
ENSGACG00000001500	scaffold_27-121	scaffold_27	4297269	4297465	+	58	0.722	59	25.3	5	5.07	1.6e-10	0.96
ENSGACG00000001500	scaffold_27-167	scaffold_27	4299836	4300032	+	49	0.789	50	21	3	7.02	1.18e-11	0.97
ENSGACG00000001501	scaffold_27-121	scaffold_27	4297269	4297465	+	58	0.722	59	25.3	5	5.07	1.6e-10	0.96
ENSGACG00000001501	scaffold_27-167	scaffold_27	4299836	4300032	+	49	0.789	50	21	3	7.02	1.18e-11	0.97
ENSGACG00000001501	scaffold_27-333	scaffold_27	4314088	4314284	+	28	0.63	30	12.5	3	4.15	7.14e-05	0.9
ENSGACG00000001502	scaffold_269-5	scaffold_269	29858	30054	+	39	0.706	39	16.8	4	4.19	4.89e-06	0.87
ENSGACG00000001502	scaffold_269-6	scaffold_269	30927	31123	+	34	0.593	36	14.6	1	14.6	4.52e-12	0.9
ENSGACG00000001502	scaffold_269-7	scaffold_269	34563	34759	+	31	0.667	33	13.3	2	6.66	2.07e-07	1.04
ENSGACG00000001502	scaffold_269-2	scaffold_269	43104	43300	+	74	0.674	74	32.2	0.5	64.43	5.37e-46	0.88
ENSGACG00000001502	scaffold_269-8	scaffold_269	43828	44024	+	31	0.775	33	13.3	2	6.66	2.07e-07	0.96
ENSGACG00000001503	scaffold_27-257	scaffold_27	4343858	4344054	+	37	0.65	38	15.9	4	3.97	1.99e-05	0.89
ENSGACG00000001504	scaffold_120-2	scaffold_120	39000	39196	+	126	0.702	126	54.5	4	13.64	2.78e-41	0.83
ENSGACG00000001505	scaffold_27-257	scaffold_27	4343858	4344054	+	37	0.65	38	15.9	4	3.97	1.99e-05	0.89
ENSGACG00000001505	scaffold_27-44	scaffold_27	4350805	4351001	+	93	0.696	90	39.9	5	7.99	6.86e-22	0.86
ENSGACG00000001508	groupXVI-601	groupXVI	395620	395816	+	31	0.969	31	13.3	1	13.31	6.36e-11	1
ENSGACG00000001509	groupXVI-601	groupXVI	395620	395816	+	31	0.969	31	13.3	1	13.31	6.36e-11	1
ENSGACG00000001510	scaffold_27-44	scaffold_27	4350805	4351001	+	93	0.696	90	39.9	5	7.99	6.86e-22	0.86
ENSGACG00000001511	scaffold_938-2	scaffold_938	566	762	+	31	0.818	35	13.7	3	4.58	1.61e-05	0.9
ENSGACG00000001512	groupXVI-237	groupXVI	416728	416924	+	53	0.75	54	22.8	4	5.69	3.46e-10	0.88
ENSGACG00000001519	groupXVI-862	groupXVI	442270	442466	+	25	0.862	25	10.7	0.5	21.48	1.63e-10	0.91
ENSGACG00000001520	scaffold_27-70	scaffold_27	4392322	4392518	+	73	0.643	73	31.4	7	4.48	2.23e-11	0.87
ENSGACG00000001521	scaffold_120-11	scaffold_120	53723	53919	+	46	0.746	47	19.8	5	3.95	1.4e-06	0.9
ENSGACG00000001523	scaffold_120-11	scaffold_120	53723	53919	+	46	0.746	47	19.8	5	3.95	1.4e-06	0.9
ENSGACG00000001523	scaffold_120-9	scaffold_120	55461	55657	+	54	0.714	54	23.2	1	23.19	1.48e-23	0.87
ENSGACG00000001523	scaffold_120-16	scaffold_120	58719	58915	+	26	0.929	27	11.2	2	5.58	8.31e-06	1.02
ENSGACG00000001524	scaffold_120-16	scaffold_120	58719	58915	+	26	0.929	27	11.2	2	5.58	8.31e-06	1.02
ENSGACG00000001529	scaffold_120-18	scaffold_120	95060	95256	+	17	0.667	18	7.3	1	7.3	8.32e-05	0.91
ENSGACG00000001530	groupXVI-335	groupXVI	448714	448910	+	41	0.635	44	17.6	1	17.61	1.09e-15	0.91
ENSGACG00000001532	groupXVI-253	groupXVI	476803	476999	+	51	0.672	52	21.9	6	3.65	1.46e-06	0.93
ENSGACG00000001533	groupXVI-253	groupXVI	476803	476999	+	51	0.672	52	21.9	6	3.65	1.46e-06	0.93
ENSGACG00000001534	scaffold_120-18	scaffold_120	95060	95256	+	17	0.667	18	7.3	1	7.3	8.32e-05	0.91
ENSGACG00000001534	scaffold_120-4	scaffold_120	115144	115340	+	85	0.777	86	36.5	3	12.17	2.19e-26	0.92
ENSGACG00000001539	groupXVI-81	groupXVI	625883	626079	+	87	0.736	85	37.4	4	9.34	2.81e-23	0.94
ENSGACG00000001539	groupXVI-118	groupXVI	625487	625683	+	72	0.796	73	30.9	2	15.46	5.86e-25	0.91
ENSGACG00000001539	groupXVI-323	groupXVI	626929	627125	+	43	0.681	45	18.5	4	4.62	2.48e-07	0.86
ENSGACG00000001540	scaffold_27-218	scaffold_27	4459926	4460122	+	38	0.727	43	16.3	2	8.16	4.8e-10	0.94
ENSGACG00000001540	scaffold_27-486	scaffold_27	4454985	4455181	+	23	0.727	23	9.9	1	9.88	1.13e-06	0.91
ENSGACG00000001540	scaffold_27-630	scaffold_27	4444892	4445088	+	18	0.792	19	7.7	0.5	15.46	9.4e-07	0.91
ENSGACG00000001544	scaffold_27-218	scaffold_27	4459926	4460122	+	38	0.727	43	16.3	2	8.16	4.8e-10	0.94
ENSGACG00000001544	scaffold_27-486	scaffold_27	4454985	4455181	+	23	0.727	23	9.9	1	9.88	1.13e-06	0.91
ENSGACG00000001544	scaffold_27-138	scaffold_27	4470056	4470252	+	55	0.602	55	23.6	1	23.62	1.48e-23	1.01
ENSGACG00000001546	groupXVI-717	groupXVI	1435359	1435555	+	28	0.609	28	12	1	12.03	8.32e-10	0.94
ENSGACG00000001548	groupXVI-195	groupXVI	1614937	1615133	+	57	0.864	58	24.5	1	24.48	6.18e-25	0.89
ENSGACG00000001548	groupXVI-772	groupXVI	1614380	1614576	+	25	0.821	27	10.7	2	5.37	4.65e-05	1.03
ENSGACG00000001549	groupXVI-195	groupXVI	1614937	1615133	+	57	0.864	58	24.5	1	24.48	6.18e-25	0.89
ENSGACG00000001549	groupXVI-772	groupXVI	1614380	1614576	+	25	0.821	27	10.7	2	5.37	4.65e-05	1.03
ENSGACG00000001549	groupXVI-1642	groupXVI	1629028	1629224	+	16	0.609	17	6.9	0.5	13.74	1.32e-05	0.9
ENSGACG00000001550	groupXVI-1642	groupXVI	1629028	1629224	+	16	0.609	17	6.9	0.5	13.74	1.32e-05	0.9
ENSGACG00000001550	groupXVI-39	groupXVI	1674617	1674813	+	114	0.827	109	49	2	24.48	3.2e-48	0.89
ENSGACG00000001550	groupXVI-863	groupXVI	1651636	1651832	+	25	0.759	25	10.7	2	5.37	4.65e-05	0.91
ENSGACG00000001551	groupXVI-39	groupXVI	1674617	1674813	+	114	0.827	109	49	2	24.48	3.2e-48	0.89
ENSGACG00000001551	groupXVI-31	groupXVI	1678048	1678244	+	118	0.789	119	50.7	6	8.45	7.46e-29	0.86
ENSGACG00000001552	scaffold_27-187	scaffold_27	4473932	4474128	+	46	0.641	47	19.8	0.5	39.51	9.51e-24	0.94
ENSGACG00000001553	scaffold_27-35	scaffold_27	4479837	4480033	+	95	0.655	95	41.2	5	8.25	1.04e-23	0.89
ENSGACG00000001554	scaffold_27-35	scaffold_27	4479837	4480033	+	95	0.655	95	41.2	5	8.25	1.04e-23	0.89
ENSGACG00000001554	scaffold_27-33	scaffold_27	4484829	4485025	+	92	0.698	96	39.5	3	13.17	1.07e-29	0.9
ENSGACG00000001555	scaffold_27-33	scaffold_27	4484829	4485025	+	92	0.698	96	39.5	3	13.17	1.07e-29	0.9
ENSGACG00000001556	groupXVI-31	groupXVI	1678048	1678244	+	118	0.789	119	50.7	6	8.45	7.46e-29	0.86
ENSGACG00000001558	scaffold_27-188	scaffold_27	4507020	4507216	+	46	0.611	47	20.2	2	10.09	6.44e-14	0.9
ENSGACG00000001560	scaffold_27-188	scaffold_27	4507020	4507216	+	46	0.611	47	20.2	2	10.09	6.44e-14	0.9
ENSGACG00000001560	scaffold_27-95	scaffold_27	4515181	4515377	+	62	0.827	65	26.6	7	3.8	2.85e-08	0.96
ENSGACG00000001560	scaffold_27-213	scaffold_27	4515750	4515946	+	44	0.714	44	18.9	4	4.72	2.48e-07	0.88
ENSGACG00000001560	scaffold_27-262	scaffold_27	4514540	4514736	+	36	0.459	37	15.5	0.5	30.92	1.42e-17	0.92
ENSGACG00000001561	scaffold_27-95	scaffold_27	4515181	4515377	+	62	0.827	65	26.6	7	3.8	2.85e-08	0.96
ENSGACG00000001561	scaffold_27-213	scaffold_27	4515750	4515946	+	44	0.714	44	18.9	4	4.72	2.48e-07	0.88
ENSGACG00000001561	scaffold_27-262	scaffold_27	4514540	4514736	+	36	0.459	37	15.5	0.5	30.92	1.42e-17	0.92
ENSGACG00000001561	scaffold_27-113	scaffold_27	4572010	4572206	+	60	0.616	61	25.8	3	8.59	3.07e-15	0.88
ENSGACG00000001561	scaffold_27-177	scaffold_27	4527019	4527215	+	48	0.587	49	21	1	21.05	7.54e-21	0.89
ENSGACG00000001561	scaffold_27-200	scaffold_27	4546160	4546356	+	45	0.638	46	19.8	1	19.76	3.18e-18	0.9
ENSGACG00000001561	scaffold_27-214	scaffold_27	4545359	4545555	+	42	0.61	44	18.9	3	6.3	3.57e-09	0.91
ENSGACG00000001561	scaffold_27-219	scaffold_27	4571195	4571391	+	42	0.774	43	18	2	9.02	6.19e-12	0.95
ENSGACG00000001561	scaffold_27-239	scaffold_27	4533785	4533981	+	40	0.627	40	17.2	4	4.3	1.13e-06	0.99
ENSGACG00000001561	scaffold_27-278	scaffold_27	4526365	4526561	+	34	0.553	35	14.6	2	7.3	2.93e-08	0.96
ENSGACG00000001561	scaffold_27-288	scaffold_27	4535854	4536050	+	33	0.623	34	14.2	2	7.09	2.93e-08	0.93
ENSGACG00000001561	scaffold_27-323	scaffold_27	4558183	4558379	+	31	0.566	31	13.3	1	13.31	6.36e-11	0.9
ENSGACG00000001561	scaffold_27-322	scaffold_27	4546658	4546854	+	30	0.587	31	12.9	3	4.3	7.14e-05	0.97
ENSGACG00000001561	scaffold_27-488	scaffold_27	4557538	4557734	+	23	0.528	23	9.9	1	9.88	1.13e-06	0.91
ENSGACG00000001561	scaffold_27-487	scaffold_27	4533160	4533356	+	22	0.606	23	9.4	1	9.45	1.13e-06	0.95
ENSGACG00000001561	scaffold_27-633	scaffold_27	4564242	4564438	+	19	0.643	19	8.2	1	8.16	1.02e-05	0.91
ENSGACG00000001561	scaffold_27-631	scaffold_27	4521914	4522110	+	18	0.545	19	7.7	1	7.73	8.32e-05	0.96
ENSGACG00000001561	scaffold_27-632	scaffold_27	4531993	4532189	+	18	0.7	19	7.7	1	7.73	8.32e-05	0.91
ENSGACG00000001565	scaffold_27-113	scaffold_27	4572010	4572206	+	60	0.616	61	25.8	3	8.59	3.07e-15	0.88
ENSGACG00000001565	scaffold_27-219	scaffold_27	4571195	4571391	+	42	0.774	43	18	2	9.02	6.19e-12	0.95
ENSGACG00000001565	scaffold_27-633	scaffold_27	4564242	4564438	+	19	0.643	19	8.2	1	8.16	1.02e-05	0.91
ENSGACG00000001565	scaffold_27-151	scaffold_27	4583773	4583969	+	50	0.61	52	21.9	2	10.95	6.11e-15	0.95
ENSGACG00000001565	scaffold_27-206	scaffold_27	4584382	4584578	+	42	0.588	45	18	0.5	36.08	3.61e-22	0.91
ENSGACG00000001565	scaffold_27-460	scaffold_27	4577531	4577727	+	23	0.561	24	9.9	1	9.88	1.13e-06	0.91
ENSGACG00000001571	scaffold_120-4	scaffold_120	115144	115340	+	85	0.777	86	36.5	3	12.17	2.19e-26	0.92
ENSGACG00000001575	scaffold_279-2	scaffold_279	8642	8838	+	77	0.793	77	33.1	2	16.54	1.42e-28	0.9
ENSGACG00000001576	scaffold_279-2	scaffold_279	8642	8838	+	77	0.793	77	33.1	2	16.54	1.42e-28	0.9
ENSGACG00000001576	scaffold_279-4	scaffold_279	12586	12782	+	33	0.821	34	14.2	3	4.72	3.4e-06	0.9
ENSGACG00000001577	groupXVI-82	groupXVI	1707058	1707254	+	83	0.699	85	35.6	1	35.65	3.66e-41	0.89
ENSGACG00000001577	groupXVI-505	groupXVI	1707641	1707837	+	34	0.627	35	14.6	2	7.3	2.93e-08	0.87
ENSGACG00000001579	scaffold_120-1	scaffold_120	126517	126713	+	165	0.766	156	70.9	5	14.17	5.13e-54	0.86
ENSGACG00000001579	scaffold_120-6	scaffold_120	130404	130600	+	76	0.773	77	32.6	5	6.53	7.02e-16	0.91
ENSGACG00000001580	scaffold_169-5	scaffold_169	56571	56767	+	22	0.684	27	9.4	1	9.45	1.13e-06	0.91
ENSGACG00000001582	scaffold_279-4	scaffold_279	12586	12782	+	33	0.821	34	14.2	3	4.72	3.4e-06	0.9
ENSGACG00000001582	scaffold_279-1	scaffold_279	13724	13920	+	78	0.812	79	33.5	7	4.79	1.02e-12	0.89
ENSGACG00000001583	scaffold_120-6	scaffold_120	130404	130600	+	76	0.773	77	32.6	5	6.53	7.02e-16	0.91
ENSGACG00000001584	scaffold_169-2	scaffold_169	126918	127114	+	121	0.718	121	52.4	2	26.2	7.85e-54	0.87
ENSGACG00000001584	scaffold_169-3	scaffold_169	109879	110075	+	54	0.654	54	23.2	4	5.8	5.97e-11	0.92
ENSGACG00000001586	scaffold_27-87	scaffold_27	4661289	4661485	+	69	0.688	69	29.6	7	4.23	4.32e-10	0.91
ENSGACG00000001586	scaffold_27-114	scaffold_27	4664396	4664592	+	58	0.686	61	24.9	7	3.56	3.89e-07	0.98
ENSGACG00000001588	scaffold_27-87	scaffold_27	4661289	4661485	+	69	0.688	69	29.6	7	4.23	4.32e-10	0.91
ENSGACG00000001588	scaffold_27-114	scaffold_27	4664396	4664592	+	58	0.686	61	24.9	7	3.56	3.89e-07	0.98
ENSGACG00000001589	scaffold_27-4	scaffold_27	4669477	4669673	+	178	0.783	178	76.9	2	38.44	5.57e-90	0.8
ENSGACG00000001589	scaffold_27-244	scaffold_27	4671705	4671901	+	39	0.692	39	16.8	4	4.19	4.89e-06	0.97
ENSGACG00000001591	scaffold_27-189	scaffold_27	4675100	4675296	+	47	0.559	47	20.2	6	3.36	5.18e-06	0.92
ENSGACG00000001591	scaffold_27-461	scaffold_27	4680852	4681048	+	22	0.538	24	9.4	0.5	18.9	3.26e-09	0.91
ENSGACG00000001593	scaffold_27-64	scaffold_27	4701913	4702109	+	75	0.591	77	32.6	3	10.88	3.86e-22	0.91
ENSGACG00000001593	scaffold_27-201	scaffold_27	4693043	4693239	+	45	0.606	46	19.3	1	19.33	3.18e-18	0.88
ENSGACG00000001593	scaffold_27-245	scaffold_27	4702616	4702812	+	37	0.677	39	15.9	3	5.3	6.7e-07	0.95
ENSGACG00000001593	scaffold_27-279	scaffold_27	4697215	4697411	+	35	0.525	35	15	3	5.01	6.7e-07	0.87
ENSGACG00000001593	scaffold_27-324	scaffold_27	4696379	4696575	+	29	0.675	31	12.5	3	4.15	7.14e-05	0.93
ENSGACG00000001593	scaffold_27-735	scaffold_27	4695848	4696044	+	16	0.8	17	6.9	0.5	13.74	1.32e-05	0.9
ENSGACG00000001596	scaffold_180-4	scaffold_180	239	435	+	43	0.768	43	18.5	0.5	36.94	3.61e-22	1.09
ENSGACG00000001596	scaffold_180-5	scaffold_180	13224	13420	+	36	0.72	37	15.5	1	15.46	3e-13	0.89
ENSGACG00000001597	scaffold_27-64	scaffold_27	4701913	4702109	+	75	0.591	77	32.6	3	10.88	3.86e-22	0.91
ENSGACG00000001597	scaffold_27-245	scaffold_27	4702616	4702812	+	37	0.677	39	15.9	3	5.3	6.7e-07	0.95
ENSGACG00000001597	scaffold_27-279	scaffold_27	4697215	4697411	+	35	0.525	35	15	3	5.01	6.7e-07	0.87
ENSGACG00000001597	scaffold_27-324	scaffold_27	4696379	4696575	+	29	0.675	31	12.5	3	4.15	7.14e-05	0.93
ENSGACG00000001597	scaffold_27-735	scaffold_27	4695848	4696044	+	16	0.8	17	6.9	0.5	13.74	1.32e-05	0.9
ENSGACG00000001597	scaffold_27-226	scaffold_27	4716395	4716591	+	42	0.649	42	18	1	18.04	6.06e-17	0.86
ENSGACG00000001597	scaffold_27-349	scaffold_27	4713729	4713925	+	28	0.636	29	12	1	12.03	8.32e-10	0.9
ENSGACG00000001597	scaffold_27-367	scaffold_27	4715820	4716016	+	27	0.568	28	11.6	2	5.8	8.31e-06	1.06
ENSGACG00000001601	scaffold_106-6	scaffold_106	53826	54022	+	35	0.536	35	15	4	3.76	1.99e-05	0.99
ENSGACG00000001608	scaffold_180-1	scaffold_180	36172	36368	+	59	0.65	62	25.3	6	4.22	5.89e-09	0.89
ENSGACG00000001614	scaffold_350-2	scaffold_350	7910	8106	+	24	0.735	26	10.3	1	10.31	1.11e-07	0.99
ENSGACG00000001614	scaffold_350-3	scaffold_350	5417	5613	+	19	0.667	20	8.2	0.5	16.32	5.88e-08	0.91
ENSGACG00000001615	scaffold_169-2	scaffold_169	126918	127114	+	121	0.718	121	52.4	2	26.2	7.85e-54	0.87
ENSGACG00000001615	scaffold_169-1	scaffold_169	130396	130592	+	319	0.684	292	137	5	27.4	8e-142	0.7
ENSGACG00000001617	scaffold_120-13	scaffold_120	173775	173971	+	38	0.87	39	16.3	3	5.44	1.24e-07	0.92
ENSGACG00000001620	groupXVI-719	groupXVI	2173503	2173699	+	26	0.632	28	11.2	2	5.58	8.31e-06	0.91
ENSGACG00000001620	groupXVI-1643	groupXVI	2202938	2203134	+	17	0.68	17	7.3	1	7.3	8.32e-05	0.91
ENSGACG00000001621	scaffold_120-13	scaffold_120	173775	173971	+	38	0.87	39	16.3	3	5.44	1.24e-07	0.92
ENSGACG00000001621	scaffold_120-14	scaffold_120	178754	178950	+	37	0.597	38	15.9	4	3.97	1.99e-05	0.89
ENSGACG00000001623	scaffold_106-7	scaffold_106	242777	242973	+	32	0.604	34	13.7	0.5	27.49	1.19e-14	0.93
ENSGACG00000001632	scaffold_180-2	scaffold_180	100008	100204	+	53	0.814	55	22.8	6	3.79	3.91e-07	0.88
ENSGACG00000001634	scaffold_120-8	scaffold_120	270909	271105	+	62	0.645	62	26.6	5	5.33	3.05e-11	0.91
ENSGACG00000001634	scaffold_120-15	scaffold_120	275100	275296	+	30	0.968	30	12.9	1	12.89	8.32e-10	1.04
ENSGACG00000001637	scaffold_106-5	scaffold_106	286721	286917	+	37	0.673	38	15.9	3	5.3	6.7e-07	0.92
ENSGACG00000001637	scaffold_106-8	scaffold_106	300746	300942	+	32	0.583	33	13.7	1	13.74	6.36e-11	0.93
ENSGACG00000001637	scaffold_106-11	scaffold_106	282997	283193	+	17	0.783	18	7.3	0.5	14.6	9.4e-07	0.91
ENSGACG00000001644	scaffold_27-65	scaffold_27	4814372	4814568	+	75	0.695	77	32.2	8	4.03	1.33e-10	0.9
ENSGACG00000001647	scaffold_120-15	scaffold_120	275100	275296	+	30	0.968	30	12.9	1	12.89	8.32e-10	1.04
ENSGACG00000001649	scaffold_27-65	scaffold_27	4814372	4814568	+	75	0.695	77	32.2	8	4.03	1.33e-10	0.9
ENSGACG00000001649	scaffold_27-80	scaffold_27	4819570	4819766	+	68	0.644	70	29.6	6	4.94	1.29e-11	0.88
ENSGACG00000001656	groupXXI-273	groupXXI	308081	308277	+	39	0.708	39	16.8	2	8.38	4.8e-10	0.87
ENSGACG00000001656	groupXXI-272	groupXXI	307632	307828	+	37	0.627	39	15.9	3	5.3	6.7e-07	0.87
ENSGACG00000001657	scaffold_27-76	scaffold_27	4828883	4829079	+	68	0.788	71	29.2	1	29.21	4.3e-32	0.87
ENSGACG00000001657	scaffold_27-310	scaffold_27	4828349	4828545	+	31	0.69	32	13.3	3	4.44	1.61e-05	1
ENSGACG00000001658	groupXXI-273	groupXXI	308081	308277	+	39	0.708	39	16.8	2	8.38	4.8e-10	0.87
ENSGACG00000001658	groupXXI-272	groupXXI	307632	307828	+	37	0.627	39	15.9	3	5.3	6.7e-07	0.87
ENSGACG00000001659	groupXVI-225	groupXVI	2237994	2238190	+	54	0.698	55	23.6	6	3.94	1.01e-07	0.96
ENSGACG00000001660	scaffold_27-76	scaffold_27	4828883	4829079	+	68	0.788	71	29.2	1	29.21	4.3e-32	0.87
ENSGACG00000001660	scaffold_27-152	scaffold_27	4829383	4829579	+	51	0.758	52	21.9	4	5.48	1.92e-09	0.93
ENSGACG00000001661	groupXVI-225	groupXVI	2237994	2238190	+	54	0.698	55	23.6	6	3.94	1.01e-07	0.96
ENSGACG00000001662	groupXXI-191	groupXXI	550533	550729	+	48	0.684	48	20.6	3	6.87	8.31e-11	0.87
ENSGACG00000001663	scaffold_27-736	scaffold_27	4851526	4851722	+	15	0.731	17	7.3	1	7.3	8.32e-05	0.9
ENSGACG00000001664	groupXVI-196	groupXVI	2257845	2258041	+	57	0.671	58	24.5	6	4.08	2.48e-08	0.92
ENSGACG00000001664	groupXVI-213	groupXVI	2258256	2258452	+	57	0.729	56	24.5	4	6.12	9.88e-12	0.96
ENSGACG00000001664	groupXVI-580	groupXVI	2256503	2256699	+	32	0.775	32	13.7	3	4.58	1.61e-05	0.9
ENSGACG00000001665	scaffold_27-736	scaffold_27	4851526	4851722	+	15	0.731	17	7.3	1	7.3	8.32e-05	0.9
ENSGACG00000001666	groupXXI-69	groupXXI	578558	578754	+	68	0.528	72	29.2	4	7.3	6.88e-16	0.91
ENSGACG00000001666	groupXXI-171	groupXXI	579403	579599	+	50	0.694	50	21.5	2	10.74	6.11e-15	0.93
ENSGACG00000001666	groupXXI-1027	groupXXI	589933	590129	+	17	0.704	18	7.3	1	7.3	8.32e-05	0.91
ENSGACG00000001667	scaffold_27-280	scaffold_27	4873454	4873650	+	35	0.761	35	15	2	7.52	3.87e-09	0.93
ENSGACG00000001668	groupXVI-196	groupXVI	2257845	2258041	+	57	0.671	58	24.5	6	4.08	2.48e-08	0.92
ENSGACG00000001668	groupXVI-213	groupXVI	2258256	2258452	+	57	0.729	56	24.5	4	6.12	9.88e-12	0.96
ENSGACG00000001668	groupXVI-580	groupXVI	2256503	2256699	+	32	0.775	32	13.7	3	4.58	1.61e-05	0.9
ENSGACG00000001670	scaffold_27-77	scaffold_27	4907322	4907518	+	66	0.651	71	28.8	1	28.78	1.25e-30	0.9
ENSGACG00000001672	scaffold_27-77	scaffold_27	4907322	4907518	+	66	0.651	71	28.8	1	28.78	1.25e-30	0.9
ENSGACG00000001672	scaffold_27-368	scaffold_27	4908401	4908597	+	28	0.524	28	12	2	6.01	1.36e-06	0.9
ENSGACG00000001675	scaffold_120-7	scaffold_120	298558	298754	+	65	0.738	65	27.9	1	27.92	3.5e-29	0.92
ENSGACG00000001676	groupXVI-812	groupXVI	2294700	2294896	+	26	0.511	26	11.2	1	11.17	1e-08	0.94
ENSGACG00000001676	groupXVI-918	groupXVI	2294025	2294221	+	23	0.639	24	9.9	1	9.88	1.13e-06	0.95
ENSGACG00000001677	scaffold_27-281	scaffold_27	4913365	4913561	+	34	0.706	35	14.6	4	3.65	7.63e-05	0.93
ENSGACG00000001678	scaffold_213-1	scaffold_213	28342	28538	+	120	0.663	123	52	2	25.99	2.04e-52	0.84
ENSGACG00000001678	scaffold_213-3	scaffold_213	33864	34060	+	82	0.641	82	35.2	3	11.74	2.63e-25	0.86
ENSGACG00000001678	scaffold_213-4	scaffold_213	26680	26876	+	59	0.779	61	25.3	4	6.34	1.57e-12	0.92
ENSGACG00000001678	scaffold_213-9	scaffold_213	27288	27484	+	32	0.733	36	13.7	1	13.74	6.36e-11	0.96
ENSGACG00000001680	groupXVI-812	groupXVI	2294700	2294896	+	26	0.511	26	11.2	1	11.17	1e-08	0.94
ENSGACG00000001680	groupXVI-918	groupXVI	2294025	2294221	+	23	0.639	24	9.9	1	9.88	1.13e-06	0.95
ENSGACG00000001680	groupXVI-49	groupXVI	2304955	2305151	+	103	0.771	102	44.2	4	11.06	2.34e-30	0.92
ENSGACG00000001680	groupXVI-167	groupXVI	2301015	2301211	+	59	0.769	62	25.3	6	4.22	5.89e-09	0.94
ENSGACG00000001681	scaffold_213-1	scaffold_213	28342	28538	+	120	0.663	123	52	2	25.99	2.04e-52	0.84
ENSGACG00000001681	scaffold_213-3	scaffold_213	33864	34060	+	82	0.641	82	35.2	3	11.74	2.63e-25	0.86
ENSGACG00000001681	scaffold_213-4	scaffold_213	26680	26876	+	59	0.779	61	25.3	4	6.34	1.57e-12	0.92
ENSGACG00000001681	scaffold_213-9	scaffold_213	27288	27484	+	32	0.733	36	13.7	1	13.74	6.36e-11	0.96
ENSGACG00000001681	scaffold_213-13	scaffold_213	34412	34608	+	24	0.676	24	10.3	1	10.31	1.11e-07	0.91
ENSGACG00000001681	scaffold_213-5	scaffold_213	39176	39372	+	56	0.722	57	24.1	1	24.05	6.18e-25	0.88
ENSGACG00000001681	scaffold_213-7	scaffold_213	38371	38567	+	46	0.766	46	19.8	5	3.95	1.4e-06	0.92
ENSGACG00000001683	scaffold_27-281	scaffold_27	4913365	4913561	+	34	0.706	35	14.6	4	3.65	7.63e-05	0.93
ENSGACG00000001684	groupXVI-49	groupXVI	2304955	2305151	+	103	0.771	102	44.2	4	11.06	2.34e-30	0.92
ENSGACG00000001684	groupXVI-167	groupXVI	2301015	2301211	+	59	0.769	62	25.3	6	4.22	5.89e-09	0.94
ENSGACG00000001684	groupXVI-294	groupXVI	2310601	2310797	+	45	0.627	47	20.2	3	6.73	8.31e-11	0.9
ENSGACG00000001686	scaffold_106-3	scaffold_106	334241	334437	+	83	0.616	82	36.1	9	4.01	9.85e-12	0.93
ENSGACG00000001686	scaffold_106-4	scaffold_106	335180	335376	+	73	0.756	74	31.4	1	31.35	4.62e-35	0.86
ENSGACG00000001689	scaffold_213-5	scaffold_213	39176	39372	+	56	0.722	57	24.1	1	24.05	6.18e-25	0.88
ENSGACG00000001689	scaffold_213-7	scaffold_213	38371	38567	+	46	0.766	46	19.8	5	3.95	1.4e-06	0.92
ENSGACG00000001689	scaffold_213-16	scaffold_213	48379	48575	+	18	0.773	18	7.7	0.5	15.46	9.4e-07	0.91
ENSGACG00000001692	scaffold_122-4	scaffold_122	13044	13240	+	82	0.664	87	35.2	7	5.03	4.14e-14	0.87
ENSGACG00000001693	scaffold_27-132	scaffold_27	5015811	5016007	+	55	0.615	57	23.6	3	7.87	2.07e-13	0.93
ENSGACG00000001693	scaffold_27-351	scaffold_27	5007554	5007750	+	28	0.426	29	12	3	4.01	7.14e-05	0.94
ENSGACG00000001693	scaffold_27-556	scaffold_27	4985406	4985602	+	21	0.667	21	9	0.5	18.04	3.26e-09	0.91
ENSGACG00000001693	scaffold_27-683	scaffold_27	4973075	4973271	+	17	0.704	18	7.3	1	7.3	8.32e-05	0.91
ENSGACG00000001693	scaffold_27-739	scaffold_27	4973820	4974016	+	16	0.95	17	6.9	0.5	13.74	1.32e-05	0.9
ENSGACG00000001694	groupXXI-126	groupXXI	793629	793825	+	58	0.682	57	24.9	6	4.15	2.48e-08	0.91
ENSGACG00000001695	scaffold_122-4	scaffold_122	13044	13240	+	82	0.664	87	35.2	7	5.03	4.14e-14	0.87
ENSGACG00000001695	scaffold_122-14	scaffold_122	28844	29040	+	26	0.55	26	11.2	0.5	22.33	7.42e-12	0.98
ENSGACG00000001696	groupXVI-226	groupXVI	2350166	2350362	+	53	0.594	55	22.8	7	3.25	4.53e-06	0.89
ENSGACG00000001696	groupXVI-311	groupXVI	2349625	2349821	+	46	0.673	46	19.8	1	19.76	3.18e-18	0.9
ENSGACG00000001696	groupXVI-438	groupXVI	2349095	2349291	+	38	0.673	38	16.3	1	16.32	1.87e-14	0.97
ENSGACG00000001696	groupXVI-813	groupXVI	2346307	2346503	+	26	0.926	26	11.2	1	11.17	1e-08	0.91
ENSGACG00000001697	scaffold_213-16	scaffold_213	48379	48575	+	18	0.773	18	7.7	0.5	15.46	9.4e-07	0.91
ENSGACG00000001699	scaffold_27-58	scaffold_27	5020639	5020835	+	78	0.673	79	33.5	6	5.58	1.65e-14	0.88
ENSGACG00000001699	scaffold_27-132	scaffold_27	5015811	5016007	+	55	0.615	57	23.6	3	7.87	2.07e-13	0.93
ENSGACG00000001699	scaffold_27-351	scaffold_27	5007554	5007750	+	28	0.426	29	12	3	4.01	7.14e-05	0.94
ENSGACG00000001699	scaffold_27-220	scaffold_27	5025765	5025961	+	40	0.589	43	17.6	5	3.52	1.99e-05	0.99
ENSGACG00000001700	groupXXI-1028	groupXXI	810918	811114	+	17	0.733	18	7.3	1	7.3	8.32e-05	0.91
ENSGACG00000001700	groupXXI-1135	groupXXI	820175	820371	+	17	0.773	17	7.3	0.5	14.6	9.4e-07	1.03
ENSGACG00000001701	groupXVI-258	groupXVI	2370525	2370721	+	49	0.61	51	21	2	10.52	6.11e-15	0.87
ENSGACG00000001701	groupXVI-919	groupXVI	2362503	2362699	+	24	0.852	24	10.3	2	5.15	4.65e-05	0.91
ENSGACG00000001701	groupXVI-254	groupXVI	2378856	2379052	+	52	0.911	52	22.3	5	4.47	1.82e-08	0.98
ENSGACG00000001702	groupXVI-254	groupXVI	2378856	2379052	+	52	0.911	52	22.3	5	4.47	1.82e-08	0.98
ENSGACG00000001702	groupXVI-20	groupXVI	2392586	2392782	+	126	0.658	127	55	7	7.85	1.95e-29	0.87
ENSGACG00000001702	groupXVI-387	groupXVI	2389591	2389787	+	35	0.549	40	15	4	3.76	1.99e-05	0.95
ENSGACG00000001702	groupXVI-549	groupXVI	2390612	2390808	+	33	0.646	33	14.2	2	7.09	2.93e-08	0.96
ENSGACG00000001702	groupXVI-637	groupXVI	2391413	2391609	+	29	0.6	30	12.5	0.5	24.91	3.09e-13	0.93
ENSGACG00000001703	scaffold_27-247	scaffold_27	5083800	5083996	+	38	0.724	39	16.3	3	5.44	1.24e-07	0.89
ENSGACG00000001703	scaffold_27-311	scaffold_27	5086729	5086925	+	28	0.56	32	12	2	6.01	1.36e-06	0.9
ENSGACG00000001703	scaffold_27-370	scaffold_27	5086108	5086304	+	27	0.711	28	11.6	0.5	23.19	7.42e-12	0.98
ENSGACG00000001703	scaffold_27-369	scaffold_27	5085579	5085775	+	26	0.55	28	11.2	2	5.58	8.31e-06	0.94
ENSGACG00000001703	scaffold_27-685	scaffold_27	5073766	5073962	+	18	0.516	18	7.7	0.5	15.46	9.4e-07	0.91
ENSGACG00000001703	scaffold_27-741	scaffold_27	5089406	5089602	+	17	0.654	17	7.3	0.5	14.6	9.4e-07	0.96
ENSGACG00000001704	scaffold_122-14	scaffold_122	28844	29040	+	26	0.55	26	11.2	0.5	22.33	7.42e-12	0.98
ENSGACG00000001704	scaffold_122-5	scaffold_122	31512	31708	+	67	0.716	71	28.8	6	4.8	6.28e-11	0.93
ENSGACG00000001704	scaffold_122-6	scaffold_122	39845	40041	+	67	0.636	71	29.6	2	14.82	8.8e-24	0.87
ENSGACG00000001704	scaffold_122-11	scaffold_122	39072	39268	+	34	0.66	34	14.6	4	3.65	7.63e-05	0.93
ENSGACG00000001706	scaffold_213-6	scaffold_213	62669	62865	+	46	0.794	47	19.8	5	3.95	1.4e-06	0.99
ENSGACG00000001709	scaffold_213-6	scaffold_213	62669	62865	+	46	0.794	47	19.8	5	3.95	1.4e-06	0.99
ENSGACG00000001709	scaffold_213-2	scaffold_213	80995	81191	+	97	0.82	96	41.7	7	5.95	1.46e-18	0.97
ENSGACG00000001711	scaffold_122-10	scaffold_122	51719	51915	+	36	0.731	37	15.9	4	3.97	1.99e-05	0.89
ENSGACG00000001712	groupXXI-1028	groupXXI	810918	811114	+	17	0.733	18	7.3	1	7.3	8.32e-05	0.91
ENSGACG00000001712	groupXXI-1135	groupXXI	820175	820371	+	17	0.773	17	7.3	0.5	14.6	9.4e-07	1.03
ENSGACG00000001712	groupXXI-113	groupXXI	875909	876105	+	60	0.692	61	25.8	5	5.15	1.6e-10	0.9
ENSGACG00000001712	groupXXI-275	groupXXI	875000	875196	+	38	0.71	39	16.8	1	16.75	1.87e-14	0.89
ENSGACG00000001712	groupXXI-338	groupXXI	873725	873921	+	32	0.632	35	13.7	3	4.58	1.61e-05	0.93
ENSGACG00000001712	groupXXI-599	groupXXI	873149	873345	+	25	0.59	25	10.7	2	5.37	4.65e-05	0.94
ENSGACG00000001712	groupXXI-1030	groupXXI	854905	855101	+	17	0.708	18	7.3	1	7.3	8.32e-05	0.91
ENSGACG00000001715	scaffold_27-741	scaffold_27	5089406	5089602	+	17	0.654	17	7.3	0.5	14.6	9.4e-07	0.96
ENSGACG00000001715	scaffold_27-135	scaffold_27	5099706	5099902	+	52	0.887	56	22.8	1	22.76	3.42e-22	0.94
ENSGACG00000001718	groupXXI-302	groupXXI	1094935	1095131	+	35	0.66	37	15	4	3.76	1.99e-05	0.98
ENSGACG00000001718	groupXXI-521	groupXXI	1144528	1144724	+	27	0.591	27	11.6	2	5.8	8.31e-06	0.94
ENSGACG00000001718	groupXXI-946	groupXXI	1014432	1014628	+	19	0.667	19	8.2	0.5	16.32	5.88e-08	0.96
ENSGACG00000001718	groupXXI-1035	groupXXI	1210767	1210963	+	18	0.538	18	7.7	1	7.73	8.32e-05	0.91
ENSGACG00000001718	groupXXI-1036	groupXXI	1214021	1214217	+	18	0.63	18	7.7	1	7.73	8.32e-05	0.96
ENSGACG00000001718	groupXXI-1143	groupXXI	1212012	1212208	+	17	0.619	17	7.3	0.5	14.6	9.4e-07	0.91
ENSGACG00000001718	groupXXI-1142	groupXXI	1211455	1211651	+	16	0.72	17	6.9	0.5	13.74	1.32e-05	0.9
ENSGACG00000001720	scaffold_122-1	scaffold_122	58007	58203	+	142	0.844	140	61	9	6.78	3.12e-29	0.8
ENSGACG00000001720	scaffold_122-2	scaffold_122	58532	58728	+	96	0.748	98	41.2	8	5.15	1.32e-16	0.87
ENSGACG00000001721	scaffold_122-2	scaffold_122	58532	58728	+	96	0.748	98	41.2	8	5.15	1.32e-16	0.87
ENSGACG00000001721	scaffold_122-8	scaffold_122	63244	63440	+	52	0.602	54	22.3	6	3.72	3.91e-07	0.92
ENSGACG00000001722	groupXXI-339	groupXXI	1293472	1293668	+	35	0.674	35	15	4	3.76	1.99e-05	0.92
ENSGACG00000001722	groupXXI-47	groupXXI	1304313	1304509	+	82	0.863	82	35.2	3	11.74	2.63e-25	0.93
ENSGACG00000001722	groupXXI-340	groupXXI	1303800	1303996	+	34	0.667	35	14.6	0.5	29.21	4.25e-16	0.96
ENSGACG00000001725	groupXVI-146	groupXVI	2403424	2403620	+	65	0.699	66	27.9	6	4.65	2.96e-10	0.9
ENSGACG00000001727	scaffold_178-1	scaffold_178	132677	132873	+	54	0.627	55	23.2	7	3.31	1.35e-06	0.92
ENSGACG00000001729	scaffold_882-1	scaffold_882	8554	8694	+	33	0.917	33	14.2	2	7.09	2.93e-08	0.99
ENSGACG00000001732	scaffold_122-8	scaffold_122	63244	63440	+	52	0.602	54	22.3	6	3.72	3.91e-07	0.92
ENSGACG00000001734	groupXVI-185	groupXVI	2407739	2407935	+	59	0.75	59	25.3	1	25.34	2.47e-26	0.94
ENSGACG00000001735	groupXVI-185	groupXVI	2407739	2407935	+	59	0.75	59	25.3	1	25.34	2.47e-26	0.94
ENSGACG00000001746	groupXVI-214	groupXVI	2431057	2431253	+	54	0.539	56	23.2	3	7.73	2.07e-13	0.9
ENSGACG00000001746	groupXVI-312	groupXVI	2437000	2437196	+	44	0.684	46	18.9	5	3.78	5.42e-06	1
ENSGACG00000001747	scaffold_739-1	scaffold_739	6302	6498	+	38	0.949	38	16.3	4	4.08	4.89e-06	0.92
ENSGACG00000001753	scaffold_132-15	scaffold_132	46645	46841	+	18	0.76	19	8.2	1	8.16	1.02e-05	0.96
ENSGACG00000001754	scaffold_122-7	scaffold_122	218143	218339	+	68	0.562	68	29.2	6	4.87	1.29e-11	0.89
ENSGACG00000001760	groupXXI-47	groupXXI	1304313	1304509	+	82	0.863	82	35.2	3	11.74	2.63e-25	0.93
ENSGACG00000001760	groupXXI-76	groupXXI	1312435	1312631	+	67	0.725	70	29.2	3	9.74	4.29e-19	0.9
ENSGACG00000001760	groupXXI-461	groupXXI	1335147	1335343	+	28	0.61	29	12	3	4.01	7.14e-05	0.9
ENSGACG00000001760	groupXXI-949	groupXXI	1320390	1320586	+	19	0.773	19	8.2	1	8.16	1.02e-05	0.91
ENSGACG00000001760	groupXXI-1039	groupXXI	1321394	1321590	+	18	0.6	18	7.7	1	7.73	8.32e-05	0.91
ENSGACG00000001768	scaffold_122-7	scaffold_122	218143	218339	+	68	0.562	68	29.2	6	4.87	1.29e-11	0.89
ENSGACG00000001778	groupXXI-127	groupXXI	1563890	1564086	+	55	0.706	57	23.6	3	7.87	2.07e-13	0.93
ENSGACG00000001786	groupXXI-84	groupXXI	1646095	1646291	+	67	0.605	68	29.2	6	4.87	1.29e-11	0.87
ENSGACG00000001786	groupXXI-164	groupXXI	1644188	1644384	+	51	0.675	51	21.9	0.5	43.81	5.66e-27	0.93
ENSGACG00000001786	groupXXI-640	groupXXI	1654980	1655176	+	22	0.676	24	9.4	1	9.45	1.13e-06	0.91
ENSGACG00000001792	groupXVI-53	groupXVI	2484792	2484988	+	99	0.74	101	42.5	8	5.32	2.49e-17	0.8
ENSGACG00000001793	scaffold_1123-1	scaffold_1123	2538	2734	+	56	0.722	56	24.1	5	4.81	8.07e-10	0.95
ENSGACG00000001796	scaffold_132-3	scaffold_132	106078	106274	+	77	0.737	77	33.1	5	6.61	1.06e-16	0.93
ENSGACG00000001803	scaffold_122-3	scaffold_122	267949	268145	+	96	0.61	97	41.2	3	13.74	5.85e-32	0.83
ENSGACG00000001807	scaffold_330-1	scaffold_330	27099	27295	+	32	0.6	32	13.7	3	4.58	1.61e-05	0.96
ENSGACG00000001809	groupXXI-11	groupXXI	1882965	1883161	+	125	0.889	123	53.7	8	6.71	6.73e-26	0.9
ENSGACG00000001809	groupXXI-93	groupXXI	1882534	1882730	+	65	0.798	65	28.3	4	7.09	5.02e-15	0.95
ENSGACG00000001814	groupXXI-11	groupXXI	1882965	1883161	+	125	0.889	123	53.7	8	6.71	6.73e-26	0.9
ENSGACG00000001814	groupXXI-93	groupXXI	1882534	1882730	+	65	0.798	65	28.3	4	7.09	5.02e-15	0.95
ENSGACG00000001814	groupXXI-140	groupXXI	1883890	1884086	+	52	0.831	54	22.3	5	4.47	1.82e-08	0.92
ENSGACG00000001819	scaffold_122-9	scaffold_122	286077	286273	+	40	0.684	41	17.2	5	3.44	1.99e-05	0.94
ENSGACG00000001828	scaffold_132-3	scaffold_132	106078	106274	+	77	0.737	77	33.1	5	6.61	1.06e-16	0.93
ENSGACG00000001828	scaffold_132-4	scaffold_132	112656	112852	+	72	0.718	72	30.9	0.5	61.85	2.13e-42	0.85
ENSGACG00000001828	scaffold_132-5	scaffold_132	112096	112292	+	60	0.633	61	25.8	4	6.44	1.57e-12	0.9
ENSGACG00000001840	scaffold_357-1	scaffold_357	11704	11900	+	77	0.883	79	33.1	9	3.67	5.95e-10	0.85
ENSGACG00000001848	groupXXI-100	groupXXI	1905948	1906144	+	59	0.91	64	25.8	5	5.15	1.6e-10	0.89
ENSGACG00000001852	groupXXI-100	groupXXI	1905948	1906144	+	59	0.91	64	25.8	5	5.15	1.6e-10	0.89
ENSGACG00000001857	scaffold_132-2	scaffold_132	119019	119215	+	99	0.719	96	42.5	4	10.63	2.78e-28	0.94
ENSGACG00000001860	groupX-124	groupX	48955	49151	+	81	0.712	82	35.2	3	11.74	2.63e-25	0.92
ENSGACG00000001862	groupXXI-30	groupXXI	1937477	1937673	+	92	0.684	92	39.5	7	5.64	4.92e-17	0.92
ENSGACG00000001865	groupX-124	groupX	48955	49151	+	81	0.712	82	35.2	3	11.74	2.63e-25	0.92
ENSGACG00000001871	groupXXI-134	groupXXI	1964149	1964345	+	55	0.705	55	23.6	6	3.94	1.01e-07	1
ENSGACG00000001878	groupXVI-227	groupXVI	2608699	2608895	+	54	0.591	55	23.2	4	5.8	5.97e-11	0.9
ENSGACG00000001878	groupXVI-461	groupXVI	2596659	2596855	+	36	0.759	37	15.5	4	3.87	1.99e-05	0.89
ENSGACG00000001878	groupXVI-462	groupXVI	2603879	2604075	+	36	0.625	37	15.5	3	5.15	6.7e-07	0.92
ENSGACG00000001878	groupXVI-551	groupXVI	2603233	2603429	+	32	0.593	33	13.7	0.5	27.49	1.19e-14	0.93
ENSGACG00000001878	groupXVI-638	groupXVI	2588296	2588492	+	29	0.643	30	12.5	3	4.15	7.14e-05	0.93
ENSGACG00000001878	groupXVI-1134	groupXVI	2592112	2592308	+	21	0.613	21	9	0.5	18.04	3.26e-09	0.95
ENSGACG00000001878	groupXVI-1237	groupXVI	2602541	2602737	+	19	0.514	20	8.2	0.5	16.32	5.88e-08	0.96
ENSGACG00000001878	groupXVI-1489	groupXVI	2601990	2602186	+	17	0.581	18	7.3	0.5	14.6	9.4e-07	0.91
ENSGACG00000001879	groupX-37	groupX	68521	68717	+	114	0.836	112	49	4	12.24	1.27e-34	0.88
ENSGACG00000001880	scaffold_132-17	scaffold_132	167409	167605	+	17	0.462	17	7.3	1	7.3	8.32e-05	0.96
ENSGACG00000001881	groupXXI-134	groupXXI	1964149	1964345	+	55	0.705	55	23.6	6	3.94	1.01e-07	1
ENSGACG00000001881	groupXXI-381	groupXXI	1974618	1974814	+	29	0.805	33	12.5	2	6.23	1.36e-06	0.93
ENSGACG00000001881	groupXXI-806	groupXXI	1973693	1973889	+	20	0.69	21	8.6	0.5	17.18	5.88e-08	1.01
ENSGACG00000001882	groupX-37	groupX	68521	68717	+	114	0.836	112	49	4	12.24	1.27e-34	0.88
ENSGACG00000001882	groupX-98	groupX	77433	77629	+	85	0.765	88	36.5	7	5.22	8.01e-15	0.92
ENSGACG00000001882	groupX-382	groupX	79036	79232	+	47	0.649	47	20.2	1	20.19	1.59e-19	0.92
ENSGACG00000001882	groupX-372	groupX	85774	85970	+	47	0.662	48	20.2	5	4.04	3.45e-07	0.94
ENSGACG00000001882	groupX-578	groupX	87268	87464	+	35	0.766	36	15	4	3.76	1.99e-05	0.9
ENSGACG00000001883	groupXVI-227	groupXVI	2608699	2608895	+	54	0.591	55	23.2	4	5.8	5.97e-11	0.9
ENSGACG00000001883	groupXVI-506	groupXVI	2617026	2617222	+	35	0.723	35	15	1	15.03	3e-13	0.95
ENSGACG00000001883	groupXVI-1490	groupXVI	2616178	2616374	+	18	0.857	18	7.7	1	7.73	8.32e-05	1.02
ENSGACG00000001883	groupXVI-581	groupXVI	2636506	2636702	+	30	0.58	32	12.9	3	4.3	7.14e-05	0.9
ENSGACG00000001883	groupXVI-639	groupXVI	2629956	2630152	+	29	0.569	30	12.5	1	12.46	8.32e-10	0.9
ENSGACG00000001883	groupXVI-924	groupXVI	2638891	2639087	+	23	0.613	24	9.9	0.5	19.76	3.26e-09	1.04
ENSGACG00000001884	groupXXI-381	groupXXI	1974618	1974814	+	29	0.805	33	12.5	2	6.23	1.36e-06	0.93
ENSGACG00000001884	groupXXI-806	groupXXI	1973693	1973889	+	20	0.69	21	8.6	0.5	17.18	5.88e-08	1.01
ENSGACG00000001885	groupXVI-295	groupXVI	2653370	2653566	+	46	0.721	47	19.8	1	19.76	3.18e-18	0.94
ENSGACG00000001886	groupXVI-1652	groupXVI	2706730	2706926	+	17	0.636	17	7.3	0.5	14.6	9.4e-07	0.91
ENSGACG00000001888	scaffold_176-3	scaffold_176	2112	2308	+	55	0.72	56	23.6	3	7.87	2.07e-13	0.91
ENSGACG00000001888	scaffold_176-8	scaffold_176	135	331	+	19	0.905	19	8.2	0.5	16.32	5.88e-08	0.96
ENSGACG00000001889	scaffold_176-1	scaffold_176	24479	24675	+	88	0.878	87	37.8	3	12.6	1.77e-27	0.88
ENSGACG00000001893	groupXVI-925	groupXVI	2786071	2786267	+	21	0.641	24	9	1	9.02	1.13e-06	0.91
ENSGACG00000001893	groupXVI-1493	groupXVI	2788288	2788484	+	17	0.607	18	7.3	1	7.3	8.32e-05	0.91
ENSGACG00000001896	groupXVI-1136	groupXVI	2823184	2823380	+	21	0.679	21	9	1	9.02	1.13e-06	1
ENSGACG00000001896	groupXVI-352	groupXVI	2855736	2855932	+	42	0.629	43	18	6	3.01	5.69e-05	0.95
ENSGACG00000001896	groupXVI-507	groupXVI	2856836	2857032	+	33	0.689	35	14.6	2	7.3	2.93e-08	0.96
ENSGACG00000001896	groupXVI-508	groupXVI	2857457	2857653	+	33	0.571	35	14.2	1	14.17	4.52e-12	0.93
ENSGACG00000001896	groupXVI-814	groupXVI	2866084	2866280	+	24	0.535	26	10.3	0.5	20.62	1.63e-10	0.91
ENSGACG00000001896	groupXVI-926	groupXVI	2850062	2850258	+	23	0.571	24	9.9	1	9.88	1.13e-06	0.95
ENSGACG00000001896	groupXVI-1654	groupXVI	2855177	2855373	+	17	0.667	17	7.3	1	7.3	8.32e-05	0.91
ENSGACG00000001897	scaffold_326-1	scaffold_326	47816	48012	+	72	0.6	73	31.4	4	7.84	1.17e-17	0.89
ENSGACG00000001900	groupXVI-352	groupXVI	2855736	2855932	+	42	0.629	43	18	6	3.01	5.69e-05	0.95
ENSGACG00000001900	groupXVI-507	groupXVI	2856836	2857032	+	33	0.689	35	14.6	2	7.3	2.93e-08	0.96
ENSGACG00000001900	groupXVI-508	groupXVI	2857457	2857653	+	33	0.571	35	14.2	1	14.17	4.52e-12	0.93
ENSGACG00000001900	groupXVI-814	groupXVI	2866084	2866280	+	24	0.535	26	10.3	0.5	20.62	1.63e-10	0.91
ENSGACG00000001900	groupXVI-1654	groupXVI	2855177	2855373	+	17	0.667	17	7.3	1	7.3	8.32e-05	0.91
ENSGACG00000001900	groupXVI-215	groupXVI	2868709	2868905	+	55	0.525	56	23.6	6	3.94	1.01e-07	0.95
ENSGACG00000001900	groupXVI-372	groupXVI	2871747	2871943	+	40	0.685	41	17.2	3	5.73	2.16e-08	1.08
ENSGACG00000001900	groupXVI-463	groupXVI	2869678	2869874	+	37	0.733	37	15.9	2	7.95	3.87e-09	0.89
ENSGACG00000001900	groupXVI-529	groupXVI	2870445	2870641	+	31	0.667	34	13.3	0.5	26.63	1.19e-14	0.96
ENSGACG00000001901	groupXVI-372	groupXVI	2871747	2871943	+	40	0.685	41	17.2	3	5.73	2.16e-08	1.08
ENSGACG00000001901	groupXVI-463	groupXVI	2869678	2869874	+	37	0.733	37	15.9	2	7.95	3.87e-09	0.89
ENSGACG00000001901	groupXVI-529	groupXVI	2870445	2870641	+	31	0.667	34	13.3	0.5	26.63	1.19e-14	0.96
ENSGACG00000001901	groupXVI-245	groupXVI	2874957	2875153	+	50	0.688	53	21.5	6	3.58	1.46e-06	0.89
ENSGACG00000001901	groupXVI-608	groupXVI	2881424	2881620	+	29	0.769	31	12.5	2	6.23	1.36e-06	0.9
ENSGACG00000001901	groupXVI-675	groupXVI	2879055	2879251	+	28	0.56	29	12	2	6.01	1.36e-06	0.94
ENSGACG00000001901	groupXVI-1242	groupXVI	2877738	2877934	+	20	0.559	20	8.6	1	8.59	1.02e-05	0.91
ENSGACG00000001904	groupXVI-1370	groupXVI	2977101	2977297	+	18	0.654	19	7.7	1	7.73	8.32e-05	0.96
ENSGACG00000001906	scaffold_326-2	scaffold_326	48510	48706	+	39	0.704	39	16.8	3	5.58	1.24e-07	0.97
ENSGACG00000001914	scaffold_176-4	scaffold_176	102898	103094	+	52	0.87	53	22.3	3	7.44	1.6e-12	0.92
ENSGACG00000001916	scaffold_132-6	scaffold_132	198007	198203	+	58	0.678	61	24.9	2	12.46	3.98e-18	0.91
ENSGACG00000001917	groupXXI-641	groupXXI	1985695	1985891	+	22	0.647	24	9.4	1	9.45	1.13e-06	0.91
ENSGACG00000001918	scaffold_132-11	scaffold_132	200960	201156	+	28	0.69	31	12.5	1	12.46	8.32e-10	0.94
ENSGACG00000001920	scaffold_176-4	scaffold_176	102898	103094	+	52	0.87	53	22.3	3	7.44	1.6e-12	0.92
ENSGACG00000001926	groupXVI-109	groupXVI	3066344	3066540	+	74	0.588	75	31.8	5	6.36	4.52e-15	0.93
ENSGACG00000001926	groupXVI-1498	groupXVI	3044760	3044956	+	17	0.652	18	7.3	1	7.3	8.32e-05	0.91
ENSGACG00000001927	scaffold_132-1	scaffold_132	220278	220474	+	133	0.747	134	57.1	4	14.28	1.01e-44	0.87
ENSGACG00000001927	scaffold_132-16	scaffold_132	216820	217016	+	18	0.704	19	7.7	1	7.73	8.32e-05	1.02
ENSGACG00000001930	groupXXI-276	groupXXI	2060316	2060512	+	37	0.717	39	15.9	2	7.95	3.87e-09	0.89
ENSGACG00000001931	scaffold_132-1	scaffold_132	220278	220474	+	133	0.747	134	57.1	4	14.28	1.01e-44	0.87
ENSGACG00000001931	scaffold_132-16	scaffold_132	216820	217016	+	18	0.704	19	7.7	1	7.73	8.32e-05	1.02
ENSGACG00000001936	scaffold_132-7	scaffold_132	228941	229137	+	55	0.753	56	23.6	5	4.72	3.91e-09	0.9
ENSGACG00000001938	scaffold_176-2	scaffold_176	135721	135917	+	72	0.758	72	31.4	2	15.68	3.77e-26	0.94
ENSGACG00000001938	scaffold_176-5	scaffold_176	128520	128716	+	43	0.797	43	18.5	5	3.69	5.42e-06	0.9
ENSGACG00000001940	groupXXI-276	groupXXI	2060316	2060512	+	37	0.717	39	15.9	2	7.95	3.87e-09	0.89
ENSGACG00000001942	scaffold_132-9	scaffold_132	249484	249680	+	45	0.738	46	19.3	3	6.44	5.59e-10	0.97
ENSGACG00000001943	groupXVI-109	groupXVI	3066344	3066540	+	74	0.588	75	31.8	5	6.36	4.52e-15	0.93
ENSGACG00000001943	groupXVI-871	groupXVI	3078937	3079133	+	25	0.55	25	10.7	1	10.74	1.11e-07	0.91
ENSGACG00000001945	scaffold_354-2	scaffold_354	9653	9849	+	23	0.846	23	9.9	0.5	19.76	3.26e-09	0.91
ENSGACG00000001946	scaffold_128-1	scaffold_128	91526	91722	+	166	0.751	162	71.3	5	14.26	3.61e-55	0.87
ENSGACG00000001950	scaffold_354-1	scaffold_354	19514	19710	+	33	0.674	36	14.2	4	3.54	7.63e-05	0.96
ENSGACG00000001952	scaffold_354-1	scaffold_354	19514	19710	+	33	0.674	36	14.2	4	3.54	7.63e-05	0.96
ENSGACG00000001954	scaffold_128-3	scaffold_128	100812	101008	+	114	0.816	115	49.4	5	9.88	2.19e-31	0.88
ENSGACG00000001955	groupXVI-83	groupXVI	3201404	3201600	+	88	0.776	85	37.8	3	12.6	1.77e-27	0.89
ENSGACG00000001956	groupXXI-192	groupXXI	2073603	2073799	+	47	0.656	48	20.2	2	10.09	6.44e-14	0.9
ENSGACG00000001958	groupXXI-192	groupXXI	2073603	2073799	+	47	0.656	48	20.2	2	10.09	6.44e-14	0.9
ENSGACG00000001959	groupX-67	groupX	946006	946202	+	99	0.675	102	42.5	4	10.63	2.78e-28	0.94
ENSGACG00000001959	groupX-314	groupX	946542	946738	+	54	0.662	53	23.2	3	7.73	2.07e-13	0.97
ENSGACG00000001961	groupXXI-304	groupXXI	2077457	2077653	+	37	0.627	37	15.9	1	15.89	3e-13	0.89
ENSGACG00000001961	groupXXI-442	groupXXI	2085248	2085444	+	28	0.784	30	12	3	4.01	7.14e-05	0.94
ENSGACG00000001961	groupXXI-527	groupXXI	2078094	2078290	+	26	0.649	27	11.2	1	11.17	1e-08	0.94
ENSGACG00000001966	groupXXI-304	groupXXI	2077457	2077653	+	37	0.627	37	15.9	1	15.89	3e-13	0.89
ENSGACG00000001966	groupXXI-442	groupXXI	2085248	2085444	+	28	0.784	30	12	3	4.01	7.14e-05	0.94
ENSGACG00000001966	groupXXI-527	groupXXI	2078094	2078290	+	26	0.649	27	11.2	1	11.17	1e-08	0.94
ENSGACG00000001969	groupXXI-442	groupXXI	2085248	2085444	+	28	0.784	30	12	3	4.01	7.14e-05	0.94
ENSGACG00000001975	groupXVI-816	groupXVI	3212606	3212802	+	24	0.833	26	10.7	2	5.37	4.65e-05	0.99
ENSGACG00000001977	scaffold_149-2	scaffold_149	3258	3454	+	67	0.781	70	28.8	5	5.76	9.93e-13	0.95
ENSGACG00000001977	scaffold_149-18	scaffold_149	14047	14243	+	19	0.562	19	8.2	1	8.16	1.02e-05	0.96
ENSGACG00000001979	groupX-624	groupX	1165808	1166004	+	34	0.615	34	14.6	4	3.65	7.63e-05	0.87
ENSGACG00000001981	groupX-159	groupX	1179728	1179924	+	73	0.608	73	31.4	8	3.92	5.37e-10	0.9
ENSGACG00000001981	groupX-624	groupX	1165808	1166004	+	34	0.615	34	14.6	4	3.65	7.63e-05	0.87
ENSGACG00000001981	groupX-52	groupX	1202371	1202567	+	105	0.773	108	45.1	4	11.27	2.08e-31	0.84
ENSGACG00000001981	groupX-240	groupX	1203004	1203200	+	60	0.75	60	25.8	3	8.59	3.07e-15	0.92
ENSGACG00000001981	groupX-989	groupX	1206654	1206850	+	24	0.667	25	10.7	0.5	21.48	1.63e-10	0.95
ENSGACG00000001984	groupX-989	groupX	1206654	1206850	+	24	0.667	25	10.7	0.5	21.48	1.63e-10	0.95
ENSGACG00000001984	groupX-990	groupX	1212799	1212995	+	24	0.632	25	10.3	1	10.31	1.11e-07	0.95
ENSGACG00000001984	groupX-167	groupX	1233352	1233548	+	71	0.694	72	30.5	5	6.1	2.82e-14	0.85
ENSGACG00000001985	groupXVI-816	groupXVI	3212606	3212802	+	24	0.833	26	10.7	2	5.37	4.65e-05	0.99
ENSGACG00000001985	groupXVI-726	groupXVI	3218463	3218659	+	25	0.659	28	10.7	2	5.37	4.65e-05	0.91
ENSGACG00000001986	scaffold_128-5	scaffold_128	139204	139400	+	76	0.755	77	32.6	2	16.32	2.35e-27	0.86
ENSGACG00000001987	groupX-167	groupX	1233352	1233548	+	71	0.694	72	30.5	5	6.1	2.82e-14	0.85
ENSGACG00000001988	scaffold_128-2	scaffold_128	149636	149832	+	141	0.779	138	61	5	12.2	7.65e-43	0.82
ENSGACG00000001988	scaffold_128-8	scaffold_128	150880	151076	+	59	0.76	63	25.3	2	12.67	3.17e-19	0.9
ENSGACG00000001992	scaffold_149-4	scaffold_149	62340	62536	+	63	0.922	63	27.1	4	6.76	3.53e-14	0.91
ENSGACG00000001993	groupX-285	groupX	1368711	1368907	+	53	0.552	55	22.8	2	11.38	5.53e-16	0.94
ENSGACG00000001993	groupX-1372	groupX	1351106	1351302	+	20	0.652	20	9	1	9.02	1.13e-06	0.91
ENSGACG00000001993	groupX-1755	groupX	1318319	1318515	+	16	0.636	17	7.3	1	7.3	8.32e-05	0.97
ENSGACG00000001994	scaffold_149-4	scaffold_149	62340	62536	+	63	0.922	63	27.1	4	6.76	3.53e-14	0.91
ENSGACG00000001994	scaffold_149-1	scaffold_149	74183	74379	+	109	0.677	112	47.2	9	5.25	4.15e-19	0.87
ENSGACG00000001994	scaffold_149-3	scaffold_149	74777	74973	+	61	0.667	64	26.2	3	8.73	3.53e-16	0.95
ENSGACG00000001994	scaffold_149-9	scaffold_149	76447	76643	+	36	0.829	37	15.9	2	7.95	3.87e-09	1.01
ENSGACG00000001995	scaffold_128-8	scaffold_128	150880	151076	+	59	0.76	63	25.3	2	12.67	3.17e-19	0.9
ENSGACG00000001996	scaffold_128-4	scaffold_128	181738	181934	+	79	0.634	81	33.9	5	6.79	1.06e-16	0.89
ENSGACG00000001996	scaffold_128-23	scaffold_128	181112	181308	+	20	0.905	20	8.6	0.5	17.18	5.88e-08	1.01
ENSGACG00000001997	groupXXI-172	groupXXI	2148992	2149188	+	49	0.761	50	21.5	5	4.3	8.11e-08	0.91
ENSGACG00000001999	groupXVI-336	groupXVI	3394325	3394521	+	42	0.588	44	18	5	3.61	5.42e-06	0.93
ENSGACG00000001999	groupXVI-640	groupXVI	3395005	3395201	+	29	0.479	30	12.5	3	4.15	7.14e-05	0.9
ENSGACG00000002001	scaffold_128-4	scaffold_128	181738	181934	+	79	0.634	81	33.9	5	6.79	1.06e-16	0.89
ENSGACG00000002001	scaffold_128-23	scaffold_128	181112	181308	+	20	0.905	20	8.6	0.5	17.18	5.88e-08	1.01
ENSGACG00000002001	scaffold_128-6	scaffold_128	197334	197530	+	64	0.704	66	27.5	2	13.74	1.8e-21	0.94
ENSGACG00000002001	scaffold_128-9	scaffold_128	196617	196813	+	48	0.59	49	20.6	6	3.44	5.18e-06	1.03
ENSGACG00000002001	scaffold_128-17	scaffold_128	199394	199590	+	23	0.531	23	9.9	0.5	19.76	3.26e-09	0.95
ENSGACG00000002002	groupX-223	groupX	1419351	1419547	+	61	0.643	62	26.2	6	4.37	1.34e-09	0.9
ENSGACG00000002002	groupX-271	groupX	1406449	1406645	+	55	0.676	57	23.6	3	7.87	2.07e-13	0.9
ENSGACG00000002002	groupX-722	groupX	1409500	1409696	+	31	0.652	31	13.3	2	6.66	2.07e-07	0.9
ENSGACG00000002002	groupX-840	groupX	1408953	1409149	+	27	0.625	28	11.6	1	11.6	1e-08	0.9
ENSGACG00000002002	groupX-1373	groupX	1410739	1410935	+	20	0.576	20	8.6	1	8.59	1.02e-05	0.91
ENSGACG00000002002	groupX-1374	groupX	1416450	1416646	+	20	0.5	20	8.6	0.5	17.18	5.88e-08	0.91
ENSGACG00000002002	groupX-299	groupX	1425445	1425641	+	53	0.845	54	22.8	5	4.55	1.82e-08	0.87
ENSGACG00000002003	groupX-299	groupX	1425445	1425641	+	53	0.845	54	22.8	5	4.55	1.82e-08	0.87
ENSGACG00000002003	groupX-58	groupX	1448161	1448357	+	100	0.676	104	43	3	14.32	4.17e-33	0.89
ENSGACG00000002003	groupX-400	groupX	1436716	1436912	+	47	0.543	46	20.2	6	3.36	5.18e-06	0.92
ENSGACG00000002003	groupX-535	groupX	1447045	1447241	+	37	0.755	38	15.9	3	5.3	6.7e-07	0.92
ENSGACG00000002003	groupX-991	groupX	1445317	1445513	+	23	0.885	25	9.9	0.5	19.76	3.26e-09	0.95
ENSGACG00000002003	groupX-1114	groupX	1444362	1444558	+	20	0.526	23	8.6	1	8.59	1.02e-05	0.91
ENSGACG00000002004	scaffold_56-10	scaffold_56	13121	13317	+	60	0.637	60	25.8	8	3.22	1.17e-06	0.9
ENSGACG00000002005	scaffold_149-1	scaffold_149	74183	74379	+	109	0.677	112	47.2	9	5.25	4.15e-19	0.87
ENSGACG00000002005	scaffold_149-3	scaffold_149	74777	74973	+	61	0.667	64	26.2	3	8.73	3.53e-16	0.95
ENSGACG00000002005	scaffold_149-9	scaffold_149	76447	76643	+	36	0.829	37	15.9	2	7.95	3.87e-09	1.01
ENSGACG00000002006	scaffold_56-10	scaffold_56	13121	13317	+	60	0.637	60	25.8	8	3.22	1.17e-06	0.9
ENSGACG00000002006	scaffold_56-16	scaffold_56	46774	46970	+	48	0.708	50	20.6	4	5.15	1.02e-08	0.89
ENSGACG00000002006	scaffold_56-22	scaffold_56	48484	48680	+	37	0.949	37	15.9	3	5.3	6.7e-07	0.95
ENSGACG00000002008	scaffold_149-26	scaffold_149	99102	99298	+	17	0.833	17	7.3	1	7.3	8.32e-05	0.96
ENSGACG00000002009	groupXVI-33	groupXVI	3415274	3415470	+	117	0.745	116	50.3	3	16.75	1.25e-42	0.91
ENSGACG00000002010	groupX-58	groupX	1448161	1448357	+	100	0.676	104	43	3	14.32	4.17e-33	0.89
ENSGACG00000002010	groupX-535	groupX	1447045	1447241	+	37	0.755	38	15.9	3	5.3	6.7e-07	0.92
ENSGACG00000002010	groupX-991	groupX	1445317	1445513	+	23	0.885	25	9.9	0.5	19.76	3.26e-09	0.95
ENSGACG00000002010	groupX-1114	groupX	1444362	1444558	+	20	0.526	23	8.6	1	8.59	1.02e-05	0.91
ENSGACG00000002011	groupXVI-33	groupXVI	3415274	3415470	+	117	0.745	116	50.3	3	16.75	1.25e-42	0.91
ENSGACG00000002011	groupXVI-108	groupXVI	3419194	3419390	+	76	0.632	76	32.6	6	5.44	9.15e-14	0.88
ENSGACG00000002013	scaffold_56-10	scaffold_56	13121	13317	+	60	0.637	60	25.8	8	3.22	1.17e-06	0.9
ENSGACG00000002014	scaffold_149-5	scaffold_149	118241	118437	+	51	0.655	52	22.3	3	7.44	1.6e-12	0.91
ENSGACG00000002014	scaffold_149-6	scaffold_149	117716	117912	+	47	0.738	51	20.2	2	10.09	6.44e-14	0.94
ENSGACG00000002014	scaffold_149-8	scaffold_149	116636	116832	+	37	0.673	38	15.9	3	5.3	6.7e-07	0.92
ENSGACG00000002014	scaffold_149-11	scaffold_149	122564	122760	+	33	0.75	33	14.2	2	7.09	2.93e-08	0.96
ENSGACG00000002014	scaffold_149-20	scaffold_149	116037	116233	+	19	0.95	19	8.2	1	8.16	1.02e-05	0.96
ENSGACG00000002014	scaffold_149-19	scaffold_149	115236	115432	+	18	0.81	19	7.7	1	7.73	8.32e-05	0.91
ENSGACG00000002015	groupXVI-108	groupXVI	3419194	3419390	+	76	0.632	76	32.6	6	5.44	9.15e-14	0.88
ENSGACG00000002015	groupXVI-113	groupXVI	3438107	3438303	+	72	0.651	74	30.9	4	7.73	9.13e-17	0.88
ENSGACG00000002015	groupXVI-151	groupXVI	3434899	3435095	+	65	0.647	65	27.9	6	4.65	2.96e-10	0.87
ENSGACG00000002015	groupXVI-314	groupXVI	3438996	3439192	+	46	0.541	46	19.8	2	9.88	6.48e-13	0.92
ENSGACG00000002016	scaffold_56-22	scaffold_56	48484	48680	+	37	0.949	37	15.9	3	5.3	6.7e-07	0.95
ENSGACG00000002016	scaffold_56-37	scaffold_56	54371	54567	+	17	0.5	17	7.3	0.5	14.6	9.4e-07	0.91
ENSGACG00000002017	scaffold_128-19	scaffold_128	214470	214666	+	20	0.568	22	8.6	0.5	17.18	5.88e-08	0.91
ENSGACG00000002017	scaffold_128-13	scaffold_128	225048	225244	+	26	0.658	27	11.2	2	5.58	8.31e-06	0.91
ENSGACG00000002018	scaffold_149-5	scaffold_149	118241	118437	+	51	0.655	52	22.3	3	7.44	1.6e-12	0.91
ENSGACG00000002018	scaffold_149-6	scaffold_149	117716	117912	+	47	0.738	51	20.2	2	10.09	6.44e-14	0.94
ENSGACG00000002018	scaffold_149-8	scaffold_149	116636	116832	+	37	0.673	38	15.9	3	5.3	6.7e-07	0.92
ENSGACG00000002018	scaffold_149-11	scaffold_149	122564	122760	+	33	0.75	33	14.2	2	7.09	2.93e-08	0.96
ENSGACG00000002018	scaffold_149-20	scaffold_149	116037	116233	+	19	0.95	19	8.2	1	8.16	1.02e-05	0.96
ENSGACG00000002018	scaffold_149-19	scaffold_149	115236	115432	+	18	0.81	19	7.7	1	7.73	8.32e-05	0.91
ENSGACG00000002018	scaffold_149-10	scaffold_149	143205	143401	+	35	0.577	35	15	4	3.76	1.99e-05	0.98
ENSGACG00000002019	groupXIX-93	groupXIX	6991	7187	+	79	0.717	78	33.9	3	11.31	3.49e-23	0.89
ENSGACG00000002021	scaffold_56-37	scaffold_56	54371	54567	+	17	0.5	17	7.3	0.5	14.6	9.4e-07	0.91
ENSGACG00000002022	scaffold_149-10	scaffold_149	143205	143401	+	35	0.577	35	15	4	3.76	1.99e-05	0.98
ENSGACG00000002024	groupXXI-742	groupXXI	2265846	2266042	+	22	0.562	22	9.4	1	9.45	1.13e-06	0.95
ENSGACG00000002025	groupXVI-113	groupXVI	3438107	3438303	+	72	0.651	74	30.9	4	7.73	9.13e-17	0.88
ENSGACG00000002025	groupXVI-151	groupXVI	3434899	3435095	+	65	0.647	65	27.9	6	4.65	2.96e-10	0.87
ENSGACG00000002025	groupXVI-314	groupXVI	3438996	3439192	+	46	0.541	46	19.8	2	9.88	6.48e-13	0.92
ENSGACG00000002025	groupXVI-583	groupXVI	3442838	3443034	+	32	0.592	32	13.7	3	4.58	1.61e-05	0.93
ENSGACG00000002025	groupXVI-817	groupXVI	3443368	3443564	+	26	0.614	26	11.6	2	5.8	8.31e-06	0.91
ENSGACG00000002028	scaffold_56-6	scaffold_56	149730	149926	+	63	0.608	64	27.1	1	27.06	3.5e-29	0.92
ENSGACG00000002028	scaffold_56-20	scaffold_56	146960	147156	+	39	0.446	41	16.8	1	16.75	1.87e-14	0.91
ENSGACG00000002029	groupX-800	groupX	1472798	1472994	+	26	0.644	29	11.2	2	5.58	8.31e-06	0.94
ENSGACG00000002031	groupXXI-742	groupXXI	2265846	2266042	+	22	0.562	22	9.4	1	9.45	1.13e-06	0.95
ENSGACG00000002033	groupXIX-139	groupXIX	319617	319813	+	65	0.661	67	27.9	4	6.98	3.53e-14	0.9
ENSGACG00000002033	groupXIX-656	groupXIX	267040	267236	+	27	0.667	28	12	1	12.03	8.32e-10	0.98
ENSGACG00000002034	groupX-23	groupX	1504800	1504996	+	114	0.703	122	49	1	48.96	3.03e-62	0.89
ENSGACG00000002034	groupX-228	groupX	1503747	1503943	+	61	0.756	61	26.2	4	6.55	2.4e-13	0.9
ENSGACG00000002035	groupXVI-553	groupXVI	3475097	3475293	+	31	0.62	33	13.3	2	6.66	2.07e-07	0.93
ENSGACG00000002035	groupXVI-1373	groupXVI	3488816	3489012	+	18	0.533	19	7.7	0.5	15.46	9.4e-07	0.91
ENSGACG00000002036	scaffold_214-1	scaffold_214	40255	40451	+	145	0.832	138	62.3	1	62.28	1.19e-86	0.92
ENSGACG00000002036	scaffold_214-2	scaffold_214	24580	24776	+	82	0.713	83	35.2	3	11.74	2.63e-25	0.86
ENSGACG00000002036	scaffold_214-3	scaffold_214	25249	25445	+	80	0.694	80	34.4	4	8.59	2.07e-20	0.93
ENSGACG00000002036	scaffold_214-5	scaffold_214	32330	32526	+	40	0.93	40	17.2	3	5.73	2.16e-08	0.96
ENSGACG00000002036	scaffold_214-6	scaffold_214	8075	8271	+	30	0.553	30	12.9	3	4.3	7.14e-05	0.97
ENSGACG00000002039	scaffold_56-3	scaffold_56	172402	172598	+	73	0.82	73	31.4	3	10.45	4.13e-21	0.95
ENSGACG00000002040	scaffold_214-1	scaffold_214	40255	40451	+	145	0.832	138	62.3	1	62.28	1.19e-86	0.92
ENSGACG00000002041	scaffold_472-1	scaffold_472	6973	7169	+	77	0.667	81	33.1	7	4.72	1.02e-12	0.92
ENSGACG00000002042	scaffold_214-4	scaffold_214	50903	51099	+	53	0.797	55	22.8	2	11.38	5.53e-16	0.96
ENSGACG00000002042	scaffold_214-7	scaffold_214	61241	61437	+	30	0.619	30	12.9	2	6.44	1.36e-06	0.9
ENSGACG00000002044	scaffold_214-4	scaffold_214	50903	51099	+	53	0.797	55	22.8	2	11.38	5.53e-16	0.96
ENSGACG00000002044	scaffold_214-7	scaffold_214	61241	61437	+	30	0.619	30	12.9	2	6.44	1.36e-06	0.9
ENSGACG00000002044	scaffold_214-10	scaffold_214	79626	79822	+	18	0.762	19	7.7	1	7.73	8.32e-05	0.96
ENSGACG00000002045	scaffold_56-13	scaffold_56	200441	200637	+	53	0.767	56	22.8	4	5.69	3.46e-10	0.94
ENSGACG00000002045	scaffold_56-17	scaffold_56	195123	195319	+	51	0.671	50	21.9	1	21.9	7.54e-21	0.93
ENSGACG00000002048	groupXXI-224	groupXXI	2362111	2362307	+	44	0.792	44	18.9	1	18.9	6.06e-17	0.9
ENSGACG00000002048	groupXXI-1044	groupXXI	2365066	2365262	+	17	0.6	18	7.3	0.5	14.6	9.4e-07	0.91
ENSGACG00000002049	scaffold_214-10	scaffold_214	79626	79822	+	18	0.762	19	7.7	1	7.73	8.32e-05	0.96
ENSGACG00000002050	groupX-23	groupX	1504800	1504996	+	114	0.703	122	49	1	48.96	3.03e-62	0.89
ENSGACG00000002050	groupX-494	groupX	1516803	1516999	+	40	0.661	40	17.2	3	5.73	2.16e-08	0.94
ENSGACG00000002050	groupX-495	groupX	1517574	1517770	+	40	0.725	40	17.2	2	8.59	5.61e-11	0.87
ENSGACG00000002050	groupX-953	groupX	1511179	1511375	+	25	0.684	26	10.7	2	5.37	4.65e-05	0.91
ENSGACG00000002050	groupX-1378	groupX	1509287	1509483	+	19	0.643	20	8.2	1	8.16	1.02e-05	0.91
ENSGACG00000002051	groupXVI-1373	groupXVI	3488816	3489012	+	18	0.533	19	7.7	0.5	15.46	9.4e-07	0.91
ENSGACG00000002053	scaffold_56-13	scaffold_56	200441	200637	+	53	0.767	56	22.8	4	5.69	3.46e-10	0.94
ENSGACG00000002056	groupXXI-165	groupXXI	2493527	2493723	+	50	0.679	51	21.5	6	3.58	1.46e-06	0.89
ENSGACG00000002057	groupXXI-642	groupXXI	2502336	2502532	+	24	0.529	24	10.3	1	10.31	1.11e-07	0.91
ENSGACG00000002060	groupXXI-166	groupXXI	2667530	2667726	+	50	0.758	51	21.5	2	10.74	6.11e-15	0.95
ENSGACG00000002060	groupXXI-875	groupXXI	2662418	2662614	+	20	0.562	20	8.6	0.5	17.18	5.88e-08	0.91
ENSGACG00000002069	groupXXI-166	groupXXI	2667530	2667726	+	50	0.758	51	21.5	2	10.74	6.11e-15	0.95
ENSGACG00000002071	groupXVI-776	groupXVI	3579243	3579439	+	26	0.703	27	11.2	2	5.58	8.31e-06	0.94
ENSGACG00000002071	groupXVI-993	groupXVI	3595776	3595972	+	22	0.533	23	9.4	1	9.45	1.13e-06	0.91
ENSGACG00000002072	scaffold_56-15	scaffold_56	881644	881840	+	51	0.625	53	23.2	1	23.19	1.48e-23	0.91
ENSGACG00000002073	groupXXI-359	groupXXI	2679502	2679698	+	34	0.698	34	14.6	2	7.3	2.93e-08	0.96
ENSGACG00000002074	groupX-495	groupX	1517574	1517770	+	40	0.725	40	17.2	2	8.59	5.61e-11	0.87
ENSGACG00000002074	groupX-154	groupX	1520296	1520492	+	74	0.784	74	31.8	6	5.3	4.91e-13	0.89
ENSGACG00000002075	groupXVI-510	groupXVI	3609716	3609912	+	34	0.686	35	14.6	3	4.87	3.4e-06	0.93
ENSGACG00000002075	groupXVI-993	groupXVI	3595776	3595972	+	22	0.533	23	9.4	1	9.45	1.13e-06	0.91
ENSGACG00000002080	scaffold_56-15	scaffold_56	881644	881840	+	51	0.625	53	23.2	1	23.19	1.48e-23	0.91
ENSGACG00000002085	groupX-127	groupX	1532966	1533162	+	81	0.726	81	34.8	9	3.87	1.56e-10	0.9
ENSGACG00000002088	scaffold_56-11	scaffold_56	911862	912058	+	59	0.648	60	25.8	6	4.3	5.89e-09	0.87
ENSGACG00000002091	groupXVI-464	groupXVI	3648613	3648809	+	36	0.618	37	15.5	4	3.87	1.99e-05	0.92
ENSGACG00000002091	groupXVI-680	groupXVI	3644143	3644339	+	29	0.829	29	12.5	0.5	24.91	3.09e-13	1.05
ENSGACG00000002091	groupXVI-731	groupXVI	3651783	3651979	+	28	0.641	28	12	1	12.03	8.32e-10	0.94
ENSGACG00000002095	groupXXI-22	groupXXI	2702128	2702324	+	103	0.602	105	44.2	2	22.12	9.37e-43	0.88
ENSGACG00000002098	groupV-655	groupV	82408	82604	+	28	0.622	28	12	1	12.03	8.32e-10	0.9
ENSGACG00000002098	groupV-578	groupV	120134	120330	+	27	0.56	31	11.6	0.5	23.19	7.42e-12	0.98
ENSGACG00000002098	groupV-1055	groupV	98041	98237	+	19	0.556	20	8.2	0.5	16.32	5.88e-08	1.08
ENSGACG00000002100	groupXIX-50	groupXIX	509710	509906	+	91	0.74	94	39.1	6	6.51	3.18e-19	0.88
ENSGACG00000002101	groupXXI-39	groupXXI	2703783	2703979	+	88	0.636	87	37.8	4	9.45	2.81e-23	0.91
ENSGACG00000002102	groupXIX-50	groupXIX	509710	509906	+	91	0.74	94	39.1	6	6.51	3.18e-19	0.88
ENSGACG00000002102	groupXIX-159	groupXIX	518043	518239	+	63	0.789	63	27.1	2	13.53	1.8e-21	0.91
ENSGACG00000002103	groupV-325	groupV	120666	120862	+	43	0.639	48	18.5	4	4.62	2.48e-07	0.95
ENSGACG00000002104	groupXIX-159	groupXIX	518043	518239	+	63	0.789	63	27.1	2	13.53	1.8e-21	0.91
ENSGACG00000002106	groupXXI-961	groupXXI	2717876	2718072	+	19	0.909	19	8.2	1	8.16	1.02e-05	0.91
ENSGACG00000002107	groupXVI-260	groupXVI	3666451	3666647	+	51	0.694	51	21.9	2	10.95	6.11e-15	0.93
ENSGACG00000002107	groupXVI-324	groupXVI	3661618	3661814	+	44	0.683	45	18.9	3	6.3	3.57e-09	0.92
ENSGACG00000002109	groupXIX-769	groupXIX	556718	556914	+	24	0.719	25	10.3	2	5.15	4.65e-05	0.95
ENSGACG00000002110	groupXVI-260	groupXVI	3666451	3666647	+	51	0.694	51	21.9	2	10.95	6.11e-15	0.93
ENSGACG00000002112	groupXIX-769	groupXIX	556718	556914	+	24	0.719	25	10.3	2	5.15	4.65e-05	0.95
ENSGACG00000002112	groupXIX-65	groupXIX	569677	569873	+	86	0.724	86	36.9	6	6.16	8.2e-17	0.97
ENSGACG00000002112	groupXIX-160	groupXIX	559987	560183	+	59	0.896	63	25.3	4	6.34	1.57e-12	0.94
ENSGACG00000002112	groupXIX-400	groupXIX	561184	561380	+	36	0.795	38	15.5	4	3.87	1.99e-05	0.98
ENSGACG00000002113	groupXVI-187	groupXVI	3718380	3718576	+	58	0.803	59	24.9	4	6.23	9.88e-12	0.92
ENSGACG00000002114	groupXIX-65	groupXIX	569677	569873	+	86	0.724	86	36.9	6	6.16	8.2e-17	0.97
ENSGACG00000002114	groupXIX-160	groupXIX	559987	560183	+	59	0.896	63	25.3	4	6.34	1.57e-12	0.94
ENSGACG00000002114	groupXIX-400	groupXIX	561184	561380	+	36	0.795	38	15.5	4	3.87	1.99e-05	0.98
ENSGACG00000002115	groupV-142	groupV	126620	126816	+	72	0.667	72	31.4	1	31.35	4.62e-35	1.01
ENSGACG00000002116	groupXXI-961	groupXXI	2717876	2718072	+	19	0.909	19	8.2	1	8.16	1.02e-05	0.91
ENSGACG00000002117	scaffold_56-19	scaffold_56	919576	919772	+	44	0.894	45	18.9	2	9.45	6.19e-12	0.9
ENSGACG00000002122	groupXVI-187	groupXVI	3718380	3718576	+	58	0.803	59	24.9	4	6.23	9.88e-12	0.92
ENSGACG00000002122	groupXVI-70	groupXVI	3726716	3726912	+	89	0.73	89	38.2	5	7.65	5.37e-21	0.9
ENSGACG00000002122	groupXVI-216	groupXVI	3728342	3728538	+	56	0.688	56	24.1	3	8.02	2.57e-14	0.93
ENSGACG00000002123	groupV-68	groupV	143927	144123	+	91	0.787	91	39.1	3	13.03	1.07e-29	0.85
ENSGACG00000002125	groupV-68	groupV	143927	144123	+	91	0.787	91	39.1	3	13.03	1.07e-29	0.85
ENSGACG00000002125	groupV-43	groupV	146711	146907	+	108	0.667	110	46.4	1	46.39	6.83e-59	0.85
ENSGACG00000002126	scaffold_56-12	scaffold_56	947505	947701	+	57	0.652	59	24.5	3	8.16	2.57e-14	0.91
ENSGACG00000002128	groupXXI-1047	groupXXI	2760934	2761130	+	18	0.68	18	7.7	0.5	15.46	9.4e-07	0.91
ENSGACG00000002129	groupV-43	groupV	146711	146907	+	108	0.667	110	46.4	1	46.39	6.83e-59	0.85
ENSGACG00000002130	groupXVI-364	groupXVI	3919726	3919922	+	43	0.662	42	18.5	5	3.69	5.42e-06	0.95
ENSGACG00000002130	groupXVI-440	groupXVI	3913215	3913411	+	36	0.529	38	16.8	4	4.19	4.89e-06	0.89
ENSGACG00000002132	scaffold_56-2	scaffold_56	961977	962173	+	73	0.852	75	31.4	5	6.27	4.52e-15	0.91
ENSGACG00000002134	groupXIX-227	groupXIX	596110	596306	+	53	0.684	54	22.8	6	3.79	3.91e-07	0.94
ENSGACG00000002135	groupXXI-24	groupXXI	2881416	2881612	+	100	0.895	101	43	4	10.74	2.78e-28	0.95
ENSGACG00000002135	groupXXI-72	groupXXI	2880985	2881181	+	71	0.722	71	30.5	3	10.16	4.28e-20	0.89
ENSGACG00000002135	groupXXI-420	groupXXI	2859674	2859870	+	30	0.737	31	13.3	2	6.66	2.07e-07	0.97
ENSGACG00000002135	groupXXI-645	groupXXI	2857452	2857648	+	21	0.655	24	9	1	9.02	1.13e-06	0.91
ENSGACG00000002135	groupXXI-810	groupXXI	2900467	2900663	+	21	0.636	21	9	0.5	18.04	3.26e-09	0.95
ENSGACG00000002135	groupXXI-963	groupXXI	2849318	2849514	+	17	0.643	19	7.3	1	7.3	8.32e-05	0.91
ENSGACG00000002136	scaffold_56-5	scaffold_56	963941	964137	+	71	0.786	70	30.5	5	6.1	2.82e-14	0.94
ENSGACG00000002142	groupV-8	groupV	183510	183706	+	164	0.714	158	71.3	3	23.77	4.59e-70	0.82
ENSGACG00000002142	groupV-603	groupV	178263	178459	+	29	0.65	30	12.5	3	4.15	7.14e-05	0.93
ENSGACG00000002144	groupXVI-364	groupXVI	3919726	3919922	+	43	0.662	42	18.5	5	3.69	5.42e-06	0.95
ENSGACG00000002145	groupXXI-360	groupXXI	2925153	2925349	+	35	0.85	34	15	0.5	30.07	1.42e-17	0.98
ENSGACG00000002146	scaffold_54-2	scaffold_54	477744	477940	+	203	0.679	201	87.2	5	17.44	2.19e-74	0.76
ENSGACG00000002147	groupXIX-216	groupXIX	619605	619801	+	51	0.797	55	21.9	2	10.95	6.11e-15	0.91
ENSGACG00000002149	groupXVI-531	groupXVI	3957292	3957488	+	34	0.659	34	14.6	1	14.6	4.52e-12	0.9
ENSGACG00000002150	scaffold_56-8	scaffold_56	1000837	1001033	+	59	0.57	63	25.8	3	8.59	3.07e-15	0.9
ENSGACG00000002154	groupXIX-75	groupXIX	642505	642701	+	82	0.739	84	35.2	3	11.74	2.63e-25	0.89
ENSGACG00000002154	groupXIX-817	groupXIX	646904	647100	+	23	0.76	24	9.9	0.5	19.76	3.26e-09	0.95
ENSGACG00000002157	groupXXI-4	groupXXI	3023932	3024128	+	150	0.868	147	64.4	3	21.48	1.41e-60	0.89
ENSGACG00000002157	groupXXI-1164	groupXXI	3019977	3020173	+	16	0.63	17	6.9	0.5	13.74	1.32e-05	0.9
[truncated: 29,002 more rows]

## Sheet: baseline_120
ensembl_gene_id	X.PeakID	chr	start	end	strand	Normalized.Tag.Count	focus.ratio	findPeaks.Score	Total.Tags..normalized.to.Control.Experiment.	Control.Tags	Fold.Change.vs.Control	p.value.vs.Control	Clonal.Fold.Change
ENSGACG00000000009	scaffold_89-16	scaffold_89	36485	36701	+	31.4	0.657	25	7.5	0.5	15.09	9.4e-07	0.91
ENSGACG00000000010	scaffold_89-6	scaffold_89	61698	61914	+	56.5	0.662	42	13.6	1	13.58	6.36e-11	0.95
ENSGACG00000000011	scaffold_89-7	scaffold_89	64557	64773	+	45.2	0.774	37	10.9	2	5.43	4.65e-05	0.93
ENSGACG00000000012	scaffold_89-17	scaffold_89	93767	93983	+	27.6	0.759	23	6.6	0.5	13.28	1.32e-05	0.96
ENSGACG00000000013	scaffold_89-17	scaffold_89	93767	93983	+	27.6	0.759	23	6.6	0.5	13.28	1.32e-05	0.96
ENSGACG00000000013	scaffold_89-10	scaffold_89	105993	106209	+	37.7	0.69	30	9.1	1	9.06	1.13e-06	0.91
ENSGACG00000000013	scaffold_89-14	scaffold_89	121767	121983	+	33.9	0.639	27	8.2	0.5	16.3	5.88e-08	0.91
ENSGACG00000000014	scaffold_89-14	scaffold_89	121767	121983	+	33.9	0.639	27	8.2	0.5	16.3	5.88e-08	0.91
ENSGACG00000000015	scaffold_89-12	scaffold_89	188376	188592	+	36.4	0.689	30	8.8	0.5	17.51	5.88e-08	0.97
ENSGACG00000000016	scaffold_89-12	scaffold_89	188376	188592	+	36.4	0.689	30	8.8	0.5	17.51	5.88e-08	0.97
ENSGACG00000000016	scaffold_89-4	scaffold_89	191810	192026	+	67.8	0.653	53	16.3	0.5	32.6	4.42e-19	0.89
ENSGACG00000000017	scaffold_89-4	scaffold_89	191810	192026	+	67.8	0.653	53	16.3	0.5	32.6	4.42e-19	0.89
ENSGACG00000000024	scaffold_89-1	scaffold_89	262782	262998	+	138.2	0.729	96	33.2	1	33.21	4.36e-38	0.88
ENSGACG00000000025	scaffold_89-9	scaffold_89	277052	277268	+	46.5	0.733	34	11.2	2	5.58	8.31e-06	0.98
ENSGACG00000000027	scaffold_89-8	scaffold_89	290838	291054	+	45.2	0.745	35	10.9	1	10.87	1.11e-07	0.99
ENSGACG00000000028	scaffold_204-1	scaffold_204	19227	19443	+	115.6	0.83	80	27.8	1	27.77	3.5e-29	0.93
ENSGACG00000000028	scaffold_204-3	scaffold_204	18459	18675	+	70.3	0.649	49	16.9	2	8.45	4.8e-10	0.98
ENSGACG00000000029	scaffold_204-1	scaffold_204	19227	19443	+	115.6	0.83	80	27.8	1	27.77	3.5e-29	0.93
ENSGACG00000000029	scaffold_204-3	scaffold_204	18459	18675	+	70.3	0.649	49	16.9	2	8.45	4.8e-10	0.98
ENSGACG00000000030	scaffold_89-8	scaffold_89	290838	291054	+	45.2	0.745	35	10.9	1	10.87	1.11e-07	0.99
ENSGACG00000000031	scaffold_89-2	scaffold_89	299134	299350	+	116.8	0.819	87	28.1	1	28.08	1.25e-30	0.9
ENSGACG00000000033	scaffold_89-2	scaffold_89	299134	299350	+	116.8	0.819	87	28.1	1	28.08	1.25e-30	0.9
ENSGACG00000000034	scaffold_204-4	scaffold_204	83066	83282	+	47.7	0.673	39	11.5	1	11.47	1e-08	0.9
ENSGACG00000000035	scaffold_89-3	scaffold_89	323239	323455	+	67.8	0.69	55	16.3	0.5	32.6	4.42e-19	0.93
ENSGACG00000000035	scaffold_89-5	scaffold_89	331376	331592	+	50.2	0.662	43	12.1	1	12.08	8.32e-10	0.87
ENSGACG00000000035	scaffold_89-13	scaffold_89	322299	322515	+	36.4	0.659	30	8.8	0.5	17.51	5.88e-08	0.91
ENSGACG00000000037	scaffold_89-3	scaffold_89	323239	323455	+	67.8	0.69	55	16.3	0.5	32.6	4.42e-19	0.93
ENSGACG00000000037	scaffold_89-5	scaffold_89	331376	331592	+	50.2	0.662	43	12.1	1	12.08	8.32e-10	0.87
ENSGACG00000000037	scaffold_89-13	scaffold_89	322299	322515	+	36.4	0.659	30	8.8	0.5	17.51	5.88e-08	0.91
ENSGACG00000000038	scaffold_204-4	scaffold_204	83066	83282	+	47.7	0.673	39	11.5	1	11.47	1e-08	0.9
ENSGACG00000000038	scaffold_204-2	scaffold_204	90776	90992	+	67.8	0.779	52	16.3	0.5	32.6	4.42e-19	0.93
ENSGACG00000000043	scaffold_243-1	scaffold_243	46238	46454	+	57.8	0.717	44	13.9	1	13.89	6.36e-11	0.95
ENSGACG00000000057	scaffold_422-1	scaffold_422	10230	10446	+	142	0.687	100	34.1	0.5	68.23	1.2e-49	0.87
ENSGACG00000000057	scaffold_422-2	scaffold_422	7772	7988	+	60.3	0.716	45	14.5	0.5	28.98	4.25e-16	0.94
ENSGACG00000000057	scaffold_422-3	scaffold_422	18107	18323	+	47.7	0.791	38	11.5	0.5	22.94	7.42e-12	0.92
ENSGACG00000000057	scaffold_422-5	scaffold_422	11432	11648	+	33.9	0.727	26	8.2	1	8.15	1.02e-05	0.98
ENSGACG00000000057	scaffold_422-4	scaffold_422	17270	17486	+	33.9	0.821	27	8.2	0.5	16.3	5.88e-08	0.91
ENSGACG00000000057	scaffold_422-7	scaffold_422	6109	6325	+	31.4	0.786	23	7.5	1	7.55	8.32e-05	0.99
ENSGACG00000000059	scaffold_99-1	scaffold_99	14406	14622	+	158.3	0.659	112	38	0.5	76.07	4.22e-57	0.84
ENSGACG00000000059	scaffold_99-14	scaffold_99	27452	27668	+	66.6	0.727	50	16	1	16	3e-13	0.91
ENSGACG00000000059	scaffold_99-34	scaffold_99	19288	19504	+	30.1	0.781	24	7.2	0.5	14.49	9.4e-07	0.95
ENSGACG00000000060	scaffold_99-14	scaffold_99	27452	27668	+	66.6	0.727	50	16	1	16	3e-13	0.91
ENSGACG00000000060	scaffold_99-29	scaffold_99	39367	39583	+	30.1	0.676	26	7.2	1	7.25	8.32e-05	0.91
ENSGACG00000000061	scaffold_99-29	scaffold_99	39367	39583	+	30.1	0.676	26	7.2	1	7.25	8.32e-05	0.91
ENSGACG00000000061	scaffold_99-4	scaffold_99	45631	45847	+	110.5	0.825	75	26.6	0.5	53.13	2.24e-35	0.95
ENSGACG00000000061	scaffold_99-8	scaffold_99	41799	42015	+	86.7	0.612	66	20.8	2	10.41	6.44e-14	0.92
ENSGACG00000000062	scaffold_99-4	scaffold_99	45631	45847	+	110.5	0.825	75	26.6	0.5	53.13	2.24e-35	0.95
ENSGACG00000000062	scaffold_99-3	scaffold_99	46085	46301	+	118.1	0.89	79	28.4	3	9.46	4.16e-18	0.94
ENSGACG00000000063	scaffold_99-6	scaffold_99	84091	84307	+	87.9	0.791	68	21.1	0.5	42.26	5.66e-27	0.89
ENSGACG00000000063	scaffold_99-20	scaffold_99	90333	90549	+	41.5	0.627	33	10	1	9.96	1.13e-06	0.96
ENSGACG00000000063	scaffold_99-23	scaffold_99	89540	89756	+	38.9	0.553	31	9.4	1	9.36	1.13e-06	0.94
ENSGACG00000000063	scaffold_99-28	scaffold_99	91371	91587	+	32.7	0.585	28	7.8	1	7.85	8.32e-05	0.91
ENSGACG00000000063	scaffold_99-43	scaffold_99	92172	92388	+	27.6	0.8	22	6.6	0.5	13.28	1.32e-05	0.91
ENSGACG00000000063	scaffold_99-48	scaffold_99	88645	88861	+	26.4	0.615	21	6.3	0.5	12.68	1.32e-05	0.96
ENSGACG00000000064	scaffold_99-18	scaffold_99	140744	140960	+	42.7	0.6	34	10.3	1	10.26	1.11e-07	0.93
ENSGACG00000000065	scaffold_99-18	scaffold_99	140744	140960	+	42.7	0.6	34	10.3	1	10.26	1.11e-07	0.93
ENSGACG00000000068	scaffold_99-21	scaffold_99	192091	192307	+	38.9	0.756	33	9.4	1	9.36	1.13e-06	0.94
ENSGACG00000000069	scaffold_99-21	scaffold_99	192091	192307	+	38.9	0.756	33	9.4	1	9.36	1.13e-06	0.94
ENSGACG00000000069	scaffold_99-13	scaffold_99	201288	201504	+	60.3	0.644	51	14.5	2	7.25	2.93e-08	0.88
ENSGACG00000000070	scaffold_99-21	scaffold_99	192091	192307	+	38.9	0.756	33	9.4	1	9.36	1.13e-06	0.94
ENSGACG00000000070	scaffold_99-13	scaffold_99	201288	201504	+	60.3	0.644	51	14.5	2	7.25	2.93e-08	0.88
ENSGACG00000000075	scaffold_99-13	scaffold_99	201288	201504	+	60.3	0.644	51	14.5	2	7.25	2.93e-08	0.88
ENSGACG00000000075	scaffold_99-22	scaffold_99	244541	244757	+	42.7	0.7	33	10.3	2	5.13	4.65e-05	0.93
ENSGACG00000000075	scaffold_99-26	scaffold_99	243257	243473	+	36.4	0.771	30	8.8	0.5	17.51	5.88e-08	0.91
ENSGACG00000000078	scaffold_95-8	scaffold_95	170526	170742	+	56.5	0.729	45	13.6	1	13.58	6.36e-11	0.89
ENSGACG00000000079	scaffold_99-9	scaffold_99	249813	250029	+	85.4	0.787	64	20.5	1	20.53	1.59e-19	0.93
ENSGACG00000000079	scaffold_99-22	scaffold_99	244541	244757	+	42.7	0.7	33	10.3	2	5.13	4.65e-05	0.93
ENSGACG00000000079	scaffold_99-26	scaffold_99	243257	243473	+	36.4	0.771	30	8.8	0.5	17.51	5.88e-08	0.91
ENSGACG00000000079	scaffold_99-33	scaffold_99	250683	250899	+	31.4	0.667	25	7.5	1	7.55	8.32e-05	0.91
ENSGACG00000000079	scaffold_99-27	scaffold_99	273101	273317	+	37.7	0.692	30	9.1	0.5	18.11	3.26e-09	0.94
ENSGACG00000000080	scaffold_58-6	scaffold_58	487681	487897	+	94.2	0.598	71	22.6	0.5	45.28	1.29e-28	0.88
ENSGACG00000000080	scaffold_58-7	scaffold_58	488875	489091	+	84.2	0.727	65	20.2	3	6.74	8.31e-11	0.88
ENSGACG00000000081	scaffold_99-5	scaffold_99	301370	301586	+	99.2	0.718	71	23.8	0.5	47.7	2.8e-30	0.9
ENSGACG00000000081	scaffold_99-16	scaffold_99	300545	300761	+	51.5	0.764	38	12.4	2	6.19	1.36e-06	0.94
ENSGACG00000000083	scaffold_58-10	scaffold_58	498157	498373	+	76.6	0.734	52	18.4	2	9.21	6.19e-12	0.99
ENSGACG00000000084	scaffold_99-5	scaffold_99	301370	301586	+	99.2	0.718	71	23.8	0.5	47.7	2.8e-30	0.9
ENSGACG00000000084	scaffold_99-16	scaffold_99	300545	300761	+	51.5	0.764	38	12.4	2	6.19	1.36e-06	0.94
ENSGACG00000000084	scaffold_99-7	scaffold_99	338909	339125	+	87.9	0.653	67	21.1	2	10.57	6.11e-15	0.89
ENSGACG00000000084	scaffold_99-12	scaffold_99	338359	338575	+	70.3	0.586	52	16.9	1	16.91	1.87e-14	0.94
ENSGACG00000000084	scaffold_99-19	scaffold_99	305081	305297	+	47.7	0.698	34	11.5	2	5.74	8.31e-06	0.98
ENSGACG00000000084	scaffold_99-17	scaffold_99	327671	327887	+	46.5	0.696	37	11.2	1	11.17	1e-08	0.9
ENSGACG00000000085	scaffold_58-10	scaffold_58	498157	498373	+	76.6	0.734	52	18.4	2	9.21	6.19e-12	0.99
ENSGACG00000000086	scaffold_99-7	scaffold_99	338909	339125	+	87.9	0.653	67	21.1	2	10.57	6.11e-15	0.89
ENSGACG00000000086	scaffold_99-12	scaffold_99	338359	338575	+	70.3	0.586	52	16.9	1	16.91	1.87e-14	0.94
ENSGACG00000000086	scaffold_99-10	scaffold_99	348954	349170	+	75.4	0.728	53	18.1	1	18.11	6.06e-17	0.98
ENSGACG00000000087	scaffold_95-7	scaffold_95	206623	206839	+	59	0.85	46	14.2	0.5	28.38	4.25e-16	0.95
ENSGACG00000000089	scaffold_99-10	scaffold_99	348954	349170	+	75.4	0.728	53	18.1	1	18.11	6.06e-17	0.98
ENSGACG00000000092	scaffold_58-3	scaffold_58	551235	551451	+	126.9	0.748	94	30.5	5	6.1	2.82e-14	0.84
ENSGACG00000000096	scaffold_58-4	scaffold_58	628397	628613	+	111.8	0.679	80	26.9	1	26.87	9.47e-28	0.91
ENSGACG00000000096	scaffold_58-8	scaffold_58	628978	629194	+	79.1	0.594	61	19	2	9.51	6.48e-13	0.87
ENSGACG00000000098	scaffold_95-6	scaffold_95	240388	240604	+	71.6	0.671	56	17.2	2	8.6	5.61e-11	0.9
ENSGACG00000000100	scaffold_95-6	scaffold_95	240388	240604	+	71.6	0.671	56	17.2	2	8.6	5.61e-11	0.9
ENSGACG00000000101	scaffold_165-1	scaffold_165	48570	48786	+	51.5	0.673	40	12.4	0.5	24.75	3.09e-13	0.92
ENSGACG00000000101	scaffold_165-3	scaffold_165	49105	49321	+	50.2	0.684	39	12.1	1	12.08	8.32e-10	0.94
ENSGACG00000000102	scaffold_95-1	scaffold_95	265631	265847	+	118.1	0.88	81	28.4	6	4.73	6.28e-11	0.94
ENSGACG00000000103	scaffold_58-1	scaffold_58	714421	714637	+	408.3	0.594	241	98.1	0.5	196.22	2.03e-184	0.7
ENSGACG00000000103	scaffold_58-2	scaffold_58	715581	715797	+	187.2	0.727	127	45	2	22.49	9.37e-43	0.83
ENSGACG00000000103	scaffold_58-11	scaffold_58	716700	716916	+	55.3	0.833	41	13.3	3	4.43	1.61e-05	0.96
ENSGACG00000000103	scaffold_58-13	scaffold_58	713604	713820	+	46.5	0.632	39	11.2	0.5	22.34	7.42e-12	0.88
ENSGACG00000000104	scaffold_95-1	scaffold_95	265631	265847	+	118.1	0.88	81	28.4	6	4.73	6.28e-11	0.94
ENSGACG00000000104	scaffold_95-5	scaffold_95	283456	283672	+	79.1	0.684	61	19	1	19.02	3.18e-18	0.87
ENSGACG00000000105	scaffold_95-5	scaffold_95	283456	283672	+	79.1	0.684	61	19	1	19.02	3.18e-18	0.87
ENSGACG00000000105	scaffold_95-4	scaffold_95	295890	296106	+	85.4	0.745	63	20.5	2	10.26	6.44e-14	0.93
ENSGACG00000000105	scaffold_95-9	scaffold_95	322495	322711	+	52.8	0.833	40	12.7	0.5	25.36	3.09e-13	0.94
ENSGACG00000000105	scaffold_95-12	scaffold_95	299195	299411	+	37.7	0.708	31	9.1	1	9.06	1.13e-06	0.97
ENSGACG00000000106	scaffold_343-1	scaffold_343	11595	11811	+	38.9	0.812	31	9.4	0.5	18.72	3.26e-09	0.97
ENSGACG00000000108	scaffold_95-2	scaffold_95	334550	334766	+	90.4	0.609	69	21.7	2	10.87	6.11e-15	0.88
ENSGACG00000000108	scaffold_95-3	scaffold_95	333967	334183	+	84.2	0.6	65	20.2	1	20.23	1.59e-19	0.88
ENSGACG00000000111	scaffold_95-18	scaffold_95	378706	378922	+	32.7	0.667	25	7.8	0.5	15.7	9.4e-07	0.95
ENSGACG00000000116	scaffold_58-16	scaffold_58	798163	798379	+	33.9	0.964	24	8.2	0.5	16.3	5.88e-08	1.02
ENSGACG00000000159	scaffold_216-6	scaffold_216	33492	33708	+	35.2	0.625	28	8.5	1	8.45	1.02e-05	0.91
ENSGACG00000000159	scaffold_216-7	scaffold_216	18818	19034	+	25.1	0.562	21	6	0.5	12.08	1.32e-05	0.91
ENSGACG00000000160	scaffold_216-6	scaffold_216	33492	33708	+	35.2	0.625	28	8.5	1	8.45	1.02e-05	0.91
ENSGACG00000000160	scaffold_216-3	scaffold_216	36396	36612	+	77.9	0.761	62	18.7	0.5	37.43	3.61e-22	0.94
ENSGACG00000000160	scaffold_216-4	scaffold_216	40108	40324	+	51.5	0.594	40	12.4	1	12.38	8.32e-10	0.89
ENSGACG00000000161	scaffold_216-4	scaffold_216	40108	40324	+	51.5	0.594	40	12.4	1	12.38	8.32e-10	0.89
ENSGACG00000000161	scaffold_216-2	scaffold_216	43749	43965	+	98	0.748	70	23.5	1	23.55	1.48e-23	0.91
ENSGACG00000000161	scaffold_216-1	scaffold_216	48138	48354	+	98	0.651	72	23.5	4	5.89	5.97e-11	0.89
ENSGACG00000000162	scaffold_216-1	scaffold_216	48138	48354	+	98	0.651	72	23.5	4	5.89	5.97e-11	0.89
ENSGACG00000000164	scaffold_324-3	scaffold_324	915	1131	+	47.7	0.854	38	11.5	0.5	22.94	7.42e-12	0.92
ENSGACG00000000165	scaffold_324-1	scaffold_324	10336	10552	+	82.9	0.89	60	19.9	0.5	39.85	9.51e-24	0.94
ENSGACG00000000167	scaffold_324-4	scaffold_324	19097	19313	+	33.9	0.816	28	8.2	0.5	16.3	5.88e-08	0.94
ENSGACG00000000168	scaffold_324-2	scaffold_324	23793	24009	+	52.8	0.655	40	12.7	0.5	25.36	3.09e-13	0.94
ENSGACG00000000191	scaffold_195-3	scaffold_195	27988	28204	+	52.8	0.882	41	12.7	0.5	25.36	3.09e-13	0.89
ENSGACG00000000195	scaffold_195-8	scaffold_195	89924	90140	+	31.4	0.697	24	7.5	0.5	15.09	9.4e-07	0.99
ENSGACG00000000195	scaffold_195-6	scaffold_195	76604	76820	+	30.1	0.714	25	7.2	1	7.25	8.32e-05	0.95
ENSGACG00000000196	scaffold_198-1	scaffold_198	100005	100221	+	139.4	0.746	97	33.5	2	16.75	1.42e-28	0.89
ENSGACG00000000196	scaffold_198-2	scaffold_198	101412	101628	+	54	0.702	41	13	1	12.98	8.32e-10	0.96
ENSGACG00000000196	scaffold_198-5	scaffold_198	103451	103667	+	33.9	0.732	26	8.2	1	8.15	1.02e-05	0.98
ENSGACG00000000196	scaffold_198-3	scaffold_198	105660	105876	+	47.7	0.902	35	11.5	0.5	22.94	7.42e-12	0.95
ENSGACG00000000198	scaffold_195-10	scaffold_195	126273	126489	+	25.1	0.741	21	6	0.5	12.08	1.32e-05	0.91
ENSGACG00000000198	scaffold_195-2	scaffold_195	141418	141634	+	59	0.78	43	14.2	1	14.19	4.52e-12	0.97
ENSGACG00000000209	scaffold_175-5	scaffold_175	45737	45953	+	49	0.66	41	11.8	1	11.77	1e-08	0.9
ENSGACG00000000209	scaffold_175-8	scaffold_175	82923	83139	+	37.7	0.643	29	9.1	0.5	18.11	3.26e-09	0.94
ENSGACG00000000216	scaffold_524-1	scaffold_524	7529	7745	+	50.2	0.586	40	12.1	0.5	24.15	3.09e-13	0.87
ENSGACG00000000225	scaffold_175-3	scaffold_175	114471	114687	+	84.2	0.64	65	20.2	1	20.23	1.59e-19	0.87
ENSGACG00000000225	scaffold_175-9	scaffold_175	108554	108770	+	36.4	0.551	27	8.8	0.5	17.51	5.88e-08	0.97
ENSGACG00000000227	scaffold_238-2	scaffold_238	10613	10829	+	35.2	0.75	28	8.5	0.5	16.91	5.88e-08	0.94
ENSGACG00000000232	scaffold_238-1	scaffold_238	41580	41796	+	74.1	0.591	58	17.8	1	17.81	1.09e-15	0.9
ENSGACG00000000232	scaffold_238-3	scaffold_238	43231	43447	+	28.9	0.613	25	6.9	0.5	13.89	1.32e-05	0.91
ENSGACG00000000235	scaffold_69-2	scaffold_69	10327	10543	+	140.7	0.566	103	33.8	1	33.81	4.36e-38	0.84
ENSGACG00000000235	scaffold_69-17	scaffold_69	1503	1719	+	36.4	0.722	30	8.8	1	8.75	1.02e-05	0.91
ENSGACG00000000235	scaffold_69-15	scaffold_69	19215	19431	+	36.4	0.73	31	8.8	1	8.75	1.02e-05	0.97
ENSGACG00000000236	scaffold_402-1	scaffold_402	8809	9025	+	91.7	0.719	70	22	0.5	44.08	1.29e-28	0.86
ENSGACG00000000237	scaffold_402-1	scaffold_402	8809	9025	+	91.7	0.719	70	22	0.5	44.08	1.29e-28	0.86
ENSGACG00000000245	scaffold_369-2	scaffold_369	10023	10239	+	59	0.746	42	14.2	0.5	28.38	4.25e-16	0.97
ENSGACG00000000245	scaffold_369-1	scaffold_369	7165	7381	+	55.3	0.633	42	13.3	1	13.28	6.36e-11	0.93
ENSGACG00000000245	scaffold_369-3	scaffold_369	10912	11128	+	41.5	0.6	32	10	1	9.96	1.13e-06	0.96
ENSGACG00000000246	scaffold_175-1	scaffold_175	144065	144281	+	100.5	0.729	70	24.2	1	24.15	6.18e-25	0.93
ENSGACG00000000246	scaffold_175-6	scaffold_175	136126	136342	+	47.7	0.717	37	11.5	1	11.47	1e-08	0.9
ENSGACG00000000250	scaffold_69-7	scaffold_69	44132	44348	+	84.2	0.639	65	20.2	0.5	40.45	2.38e-25	0.94
ENSGACG00000000250	scaffold_69-11	scaffold_69	45130	45346	+	65.3	0.761	51	15.7	1	15.7	3e-13	0.89
ENSGACG00000000251	scaffold_175-1	scaffold_175	144065	144281	+	100.5	0.729	70	24.2	1	24.15	6.18e-25	0.93
ENSGACG00000000251	scaffold_175-6	scaffold_175	136126	136342	+	47.7	0.717	37	11.5	1	11.47	1e-08	0.9
ENSGACG00000000251	scaffold_175-2	scaffold_175	144753	144969	+	93	0.611	66	22.3	2	11.17	5.53e-16	0.93
ENSGACG00000000252	scaffold_175-7	scaffold_175	162065	162281	+	40.2	0.625	31	9.7	0.5	19.32	3.26e-09	0.96
ENSGACG00000000254	scaffold_369-4	scaffold_369	21932	22148	+	38.9	0.667	32	9.4	0.5	18.72	3.26e-09	0.91
ENSGACG00000000255	scaffold_69-11	scaffold_69	45130	45346	+	65.3	0.761	51	15.7	1	15.7	3e-13	0.89
ENSGACG00000000255	scaffold_69-6	scaffold_69	47561	47777	+	101.8	0.734	75	24.5	1	24.45	6.18e-25	0.87
ENSGACG00000000257	scaffold_69-1	scaffold_69	58319	58535	+	203.5	0.821	131	48.9	1	48.91	3.03e-62	0.86
ENSGACG00000000260	scaffold_69-5	scaffold_69	83831	84047	+	123.1	0.815	91	29.6	0.5	59.17	1.28e-40	0.86
ENSGACG00000000260	scaffold_69-14	scaffold_69	113182	113398	+	44	0.786	34	10.6	0.5	21.13	1.63e-10	0.93
ENSGACG00000000261	scaffold_175-7	scaffold_175	162065	162281	+	40.2	0.625	31	9.7	0.5	19.32	3.26e-09	0.96
ENSGACG00000000261	scaffold_175-4	scaffold_175	164839	165055	+	66.6	0.76	50	16	2	8	3.87e-09	0.91
ENSGACG00000000262	scaffold_114-5	scaffold_114	115624	115840	+	72.9	0.615	54	17.5	0.5	35.02	1.3e-20	0.95
ENSGACG00000000264	scaffold_69-14	scaffold_69	113182	113398	+	44	0.786	34	10.6	0.5	21.13	1.63e-10	0.93
ENSGACG00000000265	scaffold_69-23	scaffold_69	125395	125611	+	33.9	0.659	26	8.2	0.5	16.3	5.88e-08	0.94
ENSGACG00000000269	scaffold_69-3	scaffold_69	141383	141599	+	138.2	0.664	103	33.2	3	11.07	3.49e-23	0.83
ENSGACG00000000269	scaffold_69-18	scaffold_69	148029	148245	+	41.5	0.971	30	10	1	9.96	1.13e-06	0.99
ENSGACG00000000269	scaffold_69-21	scaffold_69	144351	144567	+	33.9	0.722	28	8.2	0.5	16.3	5.88e-08	0.91
ENSGACG00000000269	scaffold_69-25	scaffold_69	139385	139601	+	31.4	0.893	20	7.5	1	7.55	8.32e-05	1.14
ENSGACG00000000271	scaffold_69-16	scaffold_69	186843	187059	+	37.7	0.644	31	9.1	0.5	18.11	3.26e-09	0.97
ENSGACG00000000273	scaffold_114-13	scaffold_114	196598	196814	+	27.6	0.692	22	6.6	0.5	13.28	1.32e-05	0.91
ENSGACG00000000278	scaffold_114-13	scaffold_114	196598	196814	+	27.6	0.692	22	6.6	0.5	13.28	1.32e-05	0.91
ENSGACG00000000280	scaffold_114-3	scaffold_114	227117	227333	+	81.7	0.625	61	19.6	1	19.62	3.18e-18	0.91
ENSGACG00000000280	scaffold_114-14	scaffold_114	226017	226233	+	28.9	0.958	21	6.9	0.5	13.89	1.32e-05	1
ENSGACG00000000280	scaffold_114-2	scaffold_114	276468	276684	+	87.9	0.788	63	21.1	3	7.04	1.18e-11	0.96
ENSGACG00000000281	scaffold_114-2	scaffold_114	276468	276684	+	87.9	0.788	63	21.1	3	7.04	1.18e-11	0.96
ENSGACG00000000281	scaffold_114-1	scaffold_114	277404	277620	+	111.8	0.717	79	26.9	3	8.96	3.53e-16	0.9
ENSGACG00000000286	scaffold_114-4	scaffold_114	306090	306306	+	80.4	0.853	61	19.3	3	6.44	5.59e-10	0.89
ENSGACG00000000286	scaffold_114-6	scaffold_114	314132	314348	+	42.7	0.745	33	10.3	1	10.26	1.11e-07	0.93
ENSGACG00000000288	scaffold_114-6	scaffold_114	314132	314348	+	42.7	0.745	33	10.3	1	10.26	1.11e-07	0.93
ENSGACG00000000289	scaffold_69-19	scaffold_69	396564	396780	+	36.4	0.725	30	8.8	0.5	17.51	5.88e-08	0.91
ENSGACG00000000291	scaffold_69-10	scaffold_69	416204	416420	+	70.3	0.646	54	16.9	1	16.91	1.87e-14	0.9
ENSGACG00000000294	scaffold_69-12	scaffold_69	446149	446365	+	54	0.722	42	13	2	6.49	1.36e-06	0.91
ENSGACG00000000299	scaffold_69-12	scaffold_69	446149	446365	+	54	0.722	42	13	2	6.49	1.36e-06	0.91
ENSGACG00000000302	scaffold_27-140	scaffold_27	36069	36285	+	59	0.603	42	14.2	0.5	28.38	4.25e-16	0.97
ENSGACG00000000306	scaffold_69-13	scaffold_69	672177	672393	+	41.5	0.6	36	10	0.5	19.92	3.26e-09	0.9
ENSGACG00000000309	scaffold_27-213	scaffold_27	84674	84890	+	41.5	0.712	33	10	1	9.96	1.13e-06	0.93
ENSGACG00000000310	scaffold_69-13	scaffold_69	672177	672393	+	41.5	0.6	36	10	0.5	19.92	3.26e-09	0.9
ENSGACG00000000311	scaffold_69-9	scaffold_69	756412	756628	+	72.9	0.843	58	17.5	0.5	35.02	1.3e-20	0.88
ENSGACG00000000311	scaffold_69-4	scaffold_69	762599	762815	+	157	0.632	101	37.7	0.5	75.47	3.21e-55	0.94
ENSGACG00000000311	scaffold_69-8	scaffold_69	780886	781102	+	89.2	0.75	65	21.4	2	10.72	6.11e-15	0.9
ENSGACG00000000312	scaffold_27-4	scaffold_27	94187	94403	+	194.7	0.75	132	46.8	2	23.4	1.81e-45	0.83
ENSGACG00000000313	scaffold_27-4	scaffold_27	94187	94403	+	194.7	0.75	132	46.8	2	23.4	1.81e-45	0.83
ENSGACG00000000314	scaffold_131-4	scaffold_131	23271	23487	+	61.6	0.729	49	14.8	1	14.79	4.52e-12	0.88
ENSGACG00000000314	scaffold_131-6	scaffold_131	24309	24525	+	45.2	0.8	36	10.9	2	5.43	4.65e-05	0.93
ENSGACG00000000316	scaffold_27-4	scaffold_27	94187	94403	+	194.7	0.75	132	46.8	2	23.4	1.81e-45	0.83
ENSGACG00000000316	scaffold_27-351	scaffold_27	102150	102366	+	27.6	0.676	24	6.6	0.5	13.28	1.32e-05	0.96
ENSGACG00000000317	scaffold_69-8	scaffold_69	780886	781102	+	89.2	0.75	65	21.4	2	10.72	6.11e-15	0.9
ENSGACG00000000318	scaffold_131-4	scaffold_131	23271	23487	+	61.6	0.729	49	14.8	1	14.79	4.52e-12	0.88
ENSGACG00000000318	scaffold_131-6	scaffold_131	24309	24525	+	45.2	0.8	36	10.9	2	5.43	4.65e-05	0.93
ENSGACG00000000319	scaffold_27-351	scaffold_27	102150	102366	+	27.6	0.676	24	6.6	0.5	13.28	1.32e-05	0.96
ENSGACG00000000319	scaffold_27-178	scaffold_27	105510	105726	+	47.7	0.784	37	11.5	2	5.74	8.31e-06	0.9
ENSGACG00000000319	scaffold_27-245	scaffold_27	114518	114734	+	35.2	0.683	30	8.5	0.5	16.91	5.88e-08	0.91
ENSGACG00000000319	scaffold_27-373	scaffold_27	122613	122829	+	27.6	0.636	23	6.6	0.5	13.28	1.32e-05	0.91
ENSGACG00000000321	scaffold_168-4	scaffold_168	27829	28045	+	51.5	0.507	43	12.4	1	12.38	8.32e-10	0.87
ENSGACG00000000321	scaffold_168-7	scaffold_168	39861	40077	+	45.2	0.679	36	10.9	1	10.87	1.11e-07	0.93
ENSGACG00000000325	scaffold_131-1	scaffold_131	40560	40776	+	90.4	0.682	66	21.7	0.5	43.47	5.66e-27	0.91
ENSGACG00000000325	scaffold_131-2	scaffold_131	39904	40120	+	87.9	0.69	63	21.1	1	21.13	7.54e-21	0.94
ENSGACG00000000325	scaffold_131-3	scaffold_131	39343	39559	+	70.3	0.685	50	16.9	1	16.91	1.87e-14	0.96
ENSGACG00000000325	scaffold_131-5	scaffold_131	38900	39116	+	50.2	0.72	39	12.1	1	12.08	8.32e-10	0.9
ENSGACG00000000327	scaffold_27-281	scaffold_27	164334	164550	+	33.9	0.737	28	8.2	1	8.15	1.02e-05	0.91
ENSGACG00000000329	scaffold_27-281	scaffold_27	164334	164550	+	33.9	0.737	28	8.2	1	8.15	1.02e-05	0.91
ENSGACG00000000330	scaffold_131-1	scaffold_131	40560	40776	+	90.4	0.682	66	21.7	0.5	43.47	5.66e-27	0.91
ENSGACG00000000330	scaffold_131-2	scaffold_131	39904	40120	+	87.9	0.69	63	21.1	1	21.13	7.54e-21	0.94
ENSGACG00000000332	scaffold_27-235	scaffold_27	195767	195983	+	42.7	0.611	31	10.3	0.5	20.53	1.63e-10	0.99
ENSGACG00000000332	scaffold_27-337	scaffold_27	199674	199890	+	31.4	0.564	25	7.5	0.5	15.09	9.4e-07	0.95
ENSGACG00000000334	scaffold_168-7	scaffold_168	39861	40077	+	45.2	0.679	36	10.9	1	10.87	1.11e-07	0.93
ENSGACG00000000340	scaffold_27-337	scaffold_27	199674	199890	+	31.4	0.564	25	7.5	0.5	15.09	9.4e-07	0.95
ENSGACG00000000342	scaffold_168-1	scaffold_168	70184	70400	+	91.7	0.727	68	22	5	4.41	1.82e-08	0.88
ENSGACG00000000342	scaffold_168-3	scaffold_168	71030	71246	+	71.6	0.809	57	17.2	2	8.6	5.61e-11	0.88
ENSGACG00000000347	scaffold_27-150	scaffold_27	219662	219878	+	50.2	0.684	41	12.1	0.5	24.15	3.09e-13	0.92
ENSGACG00000000351	scaffold_168-3	scaffold_168	71030	71246	+	71.6	0.809	57	17.2	2	8.6	5.61e-11	0.88
ENSGACG00000000351	scaffold_168-8	scaffold_168	77656	77872	+	36.4	0.605	28	8.8	0.5	17.51	5.88e-08	0.94
ENSGACG00000000353	scaffold_27-68	scaffold_27	289163	289379	+	77.9	0.51	59	18.7	2	9.36	6.19e-12	0.94
ENSGACG00000000353	scaffold_27-292	scaffold_27	248284	248500	+	32.7	0.561	27	7.8	0.5	15.7	9.4e-07	0.91
[truncated: 24,745 more rows]
