# Supplementary material for: Temporal dynamics of neurogenomic plasticity in response to social interactions in male threespined sticklebacks
Source: PLoS Genet. 2017 Jul 13;13(7):e1006840. doi: 10.1371/journal.pgen.1006840 (PMC5509087; doi:10.1371/journal.pgen.1006840)
Supplement: S9 Table — There are separate tabs for biological processes and molecular function. (XLSX) [file pgen.1006840.s011.xlsx]

## Sheet: BP
GO.ID	Desc	AccDAPDEGx	!AccDAPDEGx
GO:0002253	activation of immune response	1	0.0035
GO:0002682	regulation of immune system process	1	0.0035
GO:0002684	positive regulation of immune system process	1	0.0035
GO:0006955	immune response	0.0018	0.0023
GO:0006956	complement activation	1	0.0035
GO:0006959	humoral immune response	1	0.0035
GO:0007154	cell communication	0.0065	1
GO:0007605	sensory perception of sound	0.0088	0.0086
GO:0009653	anatomical structure morphogenesis	0.0028	1
GO:0048518	positive regulation of biological process	1	0.0035
GO:0048583	regulation of response to stimulus	1	0.0035
GO:0048584	positive regulation of response to stimulus	1	0.0035
GO:0050776	regulation of immune response	1	0.0035
GO:0050778	positive regulation of immune response	1	0.0035
GO:0050896	response to stimulus	0.0014	1
GO:0050954	sensory perception of mechanical stimulus	0.0088	0.0086
GO:0072376	protein activation cascade	1	0.0035

## Sheet: MF
GO.ID	Desc	AccDAPDEGx	!AccDAPDEGx
GO:0004930	G-protein coupled receptor activity	0.0033	1
GO:0030234	enzyme regulator activity	1	0.0058
